# Supplementary material for: Optimization and blends study of heterogeneous acid catalyst-assisted esterification of palm oil industry by-product for biodiesel production
Source: R Soc Open Sci. 2020 Jan 15;7(1):191592. doi: 10.1098/rsos.191592 (PMC7029908; doi:10.1098/rsos.191592)
Supplement: RSOS-Supplementary Data [file rsos191592supp1.xlsx]

## Sheet: B0
Title	20.08.2018	12:46:00
________________________________________________________________________________
Title
Evaluation	Categories:
Curve	Name:
	!B_100%-25..600C	10K	N2	50ML	AL100	BL	20.08.2018	12:46:03
Curve	Values:
	Index	t	Ts	Tr	x	value	y	value
	[s]	[°C]	[°C]	[s]	[%]
	0	0	25.4081	25	0	99.9998	25
	1	1	25.3975	25.1667	1	99.9996	25.1667
	2	2	25.4124	25.3333	2	99.9989	25.3333
	3	3	25.4812	25.5	3	99.9972	25.5
	4	4	25.5445	25.6667	4	99.9901	25.6667
	5	5	25.6351	25.8333	5	99.9757	25.8333
	6	6	25.7217	26	6	99.9604	26
	7	7	25.8129	26.1667	7	99.946	26.1667
	8	8	25.9267	26.3333	8	99.9382	26.3333
	9	9	26.0406	26.5	9	99.9316	26.5
	10	10	26.1533	26.6667	10	99.9258	26.6667
	11	11	26.2735	26.8333	11	99.9213	26.8333
	12	12	26.3961	27	12	99.9151	27
	13	13	26.5251	27.1667	13	99.9061	27.1667
	14	14	26.6615	27.3333	14	99.9059	27.3333
	15	15	26.7917	27.5	15	99.9123	27.5
	16	16	26.9258	27.6667	16	99.9109	27.6667
	17	17	27.057	27.8333	17	99.9107	27.8333
	18	18	27.1869	28	18	99.9114	28
	19	19	27.3134	28.1667	19	99.9123	28.1667
	20	20	27.4602	28.3333	20	99.9129	28.3333
	21	21	27.5988	28.5	21	99.9138	28.5
	22	22	27.7386	28.6667	22	99.9146	28.6667
	23	23	27.8687	28.8333	23	99.9154	28.8333
	24	24	28.0086	29	24	99.9162	29
	25	25	28.1427	29.1667	25	99.9169	29.1667
	26	26	28.2856	29.3333	26	99.9176	29.3333
	27	27	28.4242	29.5	27	99.9182	29.5
	28	28	28.5604	29.6667	28	99.9188	29.6667
	29	29	28.6845	29.8333	29	99.9194	29.8333
	30	30	28.8345	30	30	99.9199	30
	31	31	28.9743	30.1667	31	99.9204	30.1667
	32	32	29.1129	30.3333	32	99.9209	30.3333
	33	33	29.2542	30.5	33	99.9215	30.5
	34	34	29.3856	30.6667	34	99.9222	30.6667
	35	35	29.5348	30.8333	35	99.9229	30.8333
	36	36	29.6713	31	36	99.9233	31
	37	37	29.8075	31.1667	37	99.9239	31.1667
	38	38	29.9559	31.3333	38	99.9243	31.3333
	39	39	30.0852	31.5	39	99.9247	31.5
	40	40	30.2156	31.6667	40	99.9253	31.6667
	41	41	30.3484	31.8333	41	99.926	31.8333
	42	42	30.4943	32	42	99.9265	32
	43	43	30.6338	32.1667	43	99.9269	32.1667
	44	44	30.7655	32.3333	44	99.9278	32.3333
	45	45	30.8998	32.5	45	99.9281	32.5
	46	46	31.0295	32.6667	46	99.9282	32.6667
	47	47	31.1626	32.8333	47	99.9283	32.8333
	48	48	31.3085	33	48	99.9279	33
	49	49	31.4392	33.1667	49	99.9276	33.1667
	50	50	31.5725	33.3333	50	99.9272	33.3333
	51	51	31.7081	33.5	51	99.9268	33.5
	52	52	31.8463	33.6667	52	99.926	33.6667
	53	53	31.9789	33.8333	53	99.9253	33.8333
	54	54	32.1023	34	54	99.9246	34
	55	55	32.2258	34.1667	55	99.9239	34.1667
	56	56	32.3792	34.3333	56	99.923	34.3333
	57	57	32.5113	34.5	57	99.9223	34.5
	58	58	32.6463	34.6667	58	99.9215	34.6667
	59	59	32.7797	34.8333	59	99.9207	34.8333
	60	60	32.9087	35	60	99.9198	35
	61	61	33.046	35.1667	61	99.9187	35.1667
	62	62	33.1854	35.3333	62	99.9174	35.3333
	63	63	33.3149	35.5	63	99.9163	35.5
	64	64	33.4528	35.6667	64	99.915	35.6667
	65	65	33.5788	35.8333	65	99.9138	35.8333
	66	66	33.7085	36	66	99.9126	36
	67	67	33.8539	36.1667	67	99.9113	36.1667
	68	68	33.9822	36.3333	68	99.9103	36.3333
	69	69	34.1108	36.5	69	99.9093	36.5
	70	70	34.2481	36.6667	70	99.9083	36.6667
	71	71	34.3886	36.8333	71	99.9073	36.8333
	72	72	34.5147	37	72	99.9068	37
	73	73	34.6485	37.1667	73	99.9059	37.1667
	74	74	34.7802	37.3333	74	99.9051	37.3333
	75	75	34.9164	37.5	75	99.9042	37.5
	76	76	35.0613	37.6667	76	99.9031	37.6667
	77	77	35.1875	37.8333	77	99.9021	37.8333
	78	78	35.3261	38	78	99.9011	38
	79	79	35.4601	38.1667	79	99.9001	38.1667
	80	80	35.5894	38.3333	80	99.8989	38.3333
	81	81	35.723	38.5	81	99.898	38.5
	82	82	35.8629	38.6667	82	99.8972	38.6667
	83	83	36.0007	38.8333	83	99.8963	38.8333
	84	84	36.1333	39	84	99.8953	39
	85	85	36.2814	39.1667	85	99.8944	39.1667
	86	86	36.4027	39.3333	86	99.8934	39.3333
	87	87	36.5457	39.5	87	99.8924	39.5
	88	88	36.6796	39.6667	88	99.8914	39.6667
	89	89	36.8319	39.8333	89	99.8904	39.8333
	90	90	36.9482	40	90	99.8894	40
	91	91	37.0911	40.1667	91	99.8886	40.1667
	92	92	37.2342	40.3333	92	99.8881	40.3333
	93	93	37.3648	40.5	93	99.8875	40.5
	94	94	37.498	40.6667	94	99.8869	40.6667
	95	95	37.6422	40.8333	95	99.8864	40.8333
	96	96	37.7796	41	96	99.886	41
	97	97	37.9149	41.1667	97	99.8857	41.1667
	98	98	38.0532	41.3333	98	99.8853	41.3333
	99	99	38.1866	41.5	99	99.885	41.5
	100	100	38.3356	41.6667	100	99.8845	41.6667
	101	101	38.461	41.8333	101	99.8841	41.8333
	102	102	38.6028	42	102	99.8838	42
	103	103	38.7449	42.1667	103	99.8834	42.1667
	104	104	38.8801	42.3333	104	99.8831	42.3333
	105	105	39.0119	42.5	105	99.8828	42.5
	106	106	39.1425	42.6667	106	99.8825	42.6667
	107	107	39.3003	42.8333	107	99.8821	42.8333
	108	108	39.4466	43	108	99.8815	43
	109	109	39.5775	43.1667	109	99.8809	43.1667
	110	110	39.7168	43.3333	110	99.8802	43.3333
	111	111	39.8588	43.5	111	99.8797	43.5
	112	112	39.9931	43.6667	112	99.8793	43.6667
	113	113	40.1326	43.8333	113	99.879	43.8333
	114	114	40.2724	44	114	99.8787	44
	115	115	40.4265	44.1667	115	99.8785	44.1667
	116	116	40.5559	44.3333	116	99.8783	44.3333
	117	117	40.6944	44.5	117	99.8784	44.5
	118	118	40.8519	44.6667	118	99.8783	44.6667
	119	119	40.9835	44.8333	119	99.8783	44.8333
	120	120	41.127	45	120	99.8783	45
	121	121	41.2679	45.1667	121	99.8782	45.1667
	122	122	41.4064	45.3333	122	99.8781	45.3333
	123	123	41.5461	45.5	123	99.878	45.5
	124	124	41.6848	45.6667	124	99.878	45.6667
	125	125	41.8293	45.8333	125	99.878	45.8333
	126	126	41.9854	46	126	99.878	46
	127	127	42.1251	46.1667	127	99.8779	46.1667
	128	128	42.26	46.3333	128	99.8777	46.3333
	129	129	42.4033	46.5	129	99.8775	46.5
	130	130	42.5418	46.6667	130	99.8774	46.6667
	131	131	42.6814	46.8333	131	99.8773	46.8333
	132	132	42.8113	47	132	99.8773	47
	133	133	42.9715	47.1667	133	99.8771	47.1667
	134	134	43.1167	47.3333	134	99.8769	47.3333
	135	135	43.2664	47.5	135	99.8769	47.5
	136	136	43.404	47.6667	136	99.8766	47.6667
	137	137	43.5517	47.8333	137	99.8763	47.8333
	138	138	43.6882	48	138	99.8762	48
	139	139	43.8401	48.1667	139	99.8762	48.1667
	140	140	43.9898	48.3333	140	99.8762	48.3333
	141	141	44.1356	48.5	141	99.8764	48.5
	142	142	44.2729	48.6667	142	99.8765	48.6667
	143	143	44.4215	48.8333	143	99.8765	48.8333
	144	144	44.578	49	144	99.8767	49
	145	145	44.7231	49.1667	145	99.8772	49.1667
	146	146	44.8603	49.3333	146	99.8775	49.3333
	147	147	45.0034	49.5	147	99.8778	49.5
	148	148	45.1439	49.6667	148	99.8783	49.6667
	149	149	45.2956	49.8333	149	99.8788	49.8333
	150	150	45.4305	50	150	99.8791	50
	151	151	45.5784	50.1667	151	99.8792	50.1667
	152	152	45.7252	50.3333	152	99.8792	50.3333
	153	153	45.8797	50.5	153	99.879	50.5
	154	154	46.0213	50.6667	154	99.8788	50.6667
	155	155	46.1601	50.8333	155	99.8786	50.8333
	156	156	46.308	51	156	99.8783	51
	157	157	46.4661	51.1667	157	99.8777	51.1667
	158	158	46.6101	51.3333	158	99.8773	51.3333
	159	159	46.7536	51.5	159	99.8771	51.5
	160	160	46.9142	51.6667	160	99.8769	51.6667
	161	161	47.0523	51.8333	161	99.8767	51.8333
	162	162	47.1979	52	162	99.8766	52
	163	163	47.3478	52.1667	163	99.8764	52.1667
	164	164	47.4994	52.3333	164	99.8761	52.3333
	165	165	47.6514	52.5	165	99.876	52.5
	166	166	47.7972	52.6667	166	99.8761	52.6667
	167	167	47.9441	52.8333	167	99.8759	52.8333
	168	168	48.0906	53	168	99.8759	53
	169	169	48.2453	53.1667	169	99.8759	53.1667
	170	170	48.3915	53.3333	170	99.8757	53.3333
	171	171	48.5362	53.5	171	99.8757	53.5
	172	172	48.6911	53.6667	172	99.8757	53.6667
	173	173	48.8383	53.8333	173	99.8756	53.8333
	174	174	48.9943	54	174	99.8756	54
	175	175	49.1424	54.1667	175	99.8757	54.1667
	176	176	49.3004	54.3333	176	99.8756	54.3333
	177	177	49.4408	54.5	177	99.8755	54.5
	178	178	49.6019	54.6667	178	99.8756	54.6667
	179	179	49.7542	54.8333	179	99.8756	54.8333
	180	180	49.8998	55	180	99.8752	55
	181	181	50.0418	55.1667	181	99.875	55.1667
	182	182	50.1979	55.3333	182	99.8751	55.3333
	183	183	50.3485	55.5	183	99.8749	55.5
	184	184	50.4871	55.6667	184	99.8747	55.6667
	185	185	50.641	55.8333	185	99.8747	55.8333
	186	186	50.7917	56	186	99.8747	56
	187	187	50.9494	56.1667	187	99.8745	56.1667
	188	188	51.1026	56.3333	188	99.8744	56.3333
	189	189	51.2504	56.5	189	99.8746	56.5
	190	190	51.4018	56.6667	190	99.8742	56.6667
	191	191	51.5633	56.8333	191	99.874	56.8333
	192	192	51.7159	57	192	99.874	57
	193	193	51.8661	57.1667	193	99.8739	57.1667
	194	194	52.0053	57.3333	194	99.8735	57.3333
	195	195	52.1677	57.5	195	99.8734	57.5
	196	196	52.3138	57.6667	196	99.8733	57.6667
	197	197	52.4692	57.8333	197	99.8729	57.8333
	198	198	52.6243	58	198	99.8725	58
	199	199	52.7723	58.1667	199	99.8725	58.1667
	200	200	52.9298	58.3333	200	99.8724	58.3333
	201	201	53.0804	58.5	201	99.872	58.5
	202	202	53.2271	58.6667	202	99.8721	58.6667
	203	203	53.3802	58.8333	203	99.8722	58.8333
	204	204	53.5315	59	204	99.8721	59
	205	205	53.6918	59.1667	205	99.8721	59.1667
	206	206	53.8422	59.3333	206	99.8726	59.3333
	207	207	54.0066	59.5	207	99.8728	59.5
	208	208	54.1585	59.6667	208	99.8728	59.6667
	209	209	54.3084	59.8333	209	99.8727	59.8333
	210	210	54.4551	60	210	99.8732	60
	211	211	54.6179	60.1667	211	99.8732	60.1667
	212	212	54.7699	60.3333	212	99.8729	60.3333
	213	213	54.9176	60.5	213	99.8727	60.5
	214	214	55.0868	60.6667	214	99.8724	60.6667
	215	215	55.2396	60.8333	215	99.872	60.8333
	216	216	55.3806	61	216	99.8716	61
	217	217	55.5441	61.1667	217	99.8714	61.1667
	218	218	55.7001	61.3333	218	99.8711	61.3333
	219	219	55.8581	61.5	219	99.8708	61.5
	220	220	56.0058	61.6667	220	99.8706	61.6667
	221	221	56.1686	61.8333	221	99.8707	61.8333
	222	222	56.3167	62	222	99.8709	62
	223	223	56.4815	62.1667	223	99.8708	62.1667
	224	224	56.6337	62.3333	224	99.8705	62.3333
	225	225	56.7931	62.5	225	99.8703	62.5
	226	226	56.9429	62.6667	226	99.87	62.6667
	227	227	57.1057	62.8333	227	99.8697	62.8333
	228	228	57.2561	63	228	99.8693	63
	229	229	57.4189	63.1667	229	99.8688	63.1667
	230	230	57.5787	63.3333	230	99.8684	63.3333
	231	231	57.7193	63.5	231	99.8682	63.5
	232	232	57.8842	63.6667	232	99.8678	63.6667
	233	233	58.0405	63.8333	233	99.8673	63.8333
	234	234	58.1937	64	234	99.8671	64
	235	235	58.3553	64.1667	235	99.867	64.1667
	236	236	58.5104	64.3333	236	99.8665	64.3333
	237	237	58.6605	64.5	237	99.8657	64.5
	238	238	58.8156	64.6667	238	99.8652	64.6667
	239	239	58.9808	64.8333	239	99.865	64.8333
	240	240	59.1318	65	240	99.8645	65
	241	241	59.2852	65.1667	241	99.8638	65.1667
	242	242	59.4627	65.3333	242	99.8635	65.3333
	243	243	59.606	65.5	243	99.8635	65.5
	244	244	59.7601	65.6667	244	99.8632	65.6667
	245	245	59.9162	65.8333	245	99.8627	65.8333
	246	246	60.0763	66	246	99.8623	66
	247	247	60.2367	66.1667	247	99.8619	66.1667
	248	248	60.3835	66.3333	248	99.8614	66.3333
	249	249	60.5648	66.5	249	99.8609	66.5
	250	250	60.7217	66.6667	250	99.8606	66.6667
	251	251	60.8662	66.8333	251	99.8598	66.8333
	252	252	61.0264	67	252	99.8591	67
	253	253	61.1892	67.1667	253	99.8586	67.1667
	254	254	61.3434	67.3333	254	99.858	67.3333
	255	255	61.4966	67.5	255	99.8569	67.5
	256	256	61.6747	67.6667	256	99.8559	67.6667
	257	257	61.8199	67.8333	257	99.855	67.8333
	258	258	61.9783	68	258	99.8542	68
	259	259	62.1334	68.1667	259	99.853	68.1667
	260	260	62.3133	68.3333	260	99.8522	68.3333
	261	261	62.4597	68.5	261	99.8516	68.5
	262	262	62.6141	68.6667	262	99.8511	68.6667
	263	263	62.7797	68.8333	263	99.851	68.8333
	264	264	62.9364	69	264	99.8508	69
	265	265	63.1017	69.1667	265	99.8508	69.1667
	266	266	63.2594	69.3333	266	99.8508	69.3333
	267	267	63.4198	69.5	267	99.851	69.5
	268	268	63.5841	69.6667	268	99.8513	69.6667
	269	269	63.7341	69.8333	269	99.8516	69.8333
	270	270	63.8897	70	270	99.8517	70
	271	271	64.0637	70.1667	271	99.8523	70.1667
	272	272	64.2229	70.3333	272	99.8529	70.3333
	273	273	64.3959	70.5	273	99.8532	70.5
	274	274	64.5486	70.6667	274	99.8535	70.6667
	275	275	64.7134	70.8333	275	99.8543	70.8333
	276	276	64.8757	71	276	99.8549	71
	277	277	65.0366	71.1667	277	99.8554	71.1667
	278	278	65.1989	71.3333	278	99.856	71.3333
	279	279	65.3695	71.5	279	99.8566	71.5
	280	280	65.5265	71.6667	280	99.857	71.6667
	281	281	65.6918	71.8333	281	99.8573	71.8333
	282	282	65.8745	72	282	99.8577	72
	283	283	66.0306	72.1667	283	99.8576	72.1667
	284	284	66.1941	72.3333	284	99.8576	72.3333
	285	285	66.3634	72.5	285	99.8577	72.5
	286	286	66.5243	72.6667	286	99.8579	72.6667
	287	287	66.689	72.8333	287	99.858	72.8333
	288	288	66.8587	73	288	99.8582	73
	289	289	67.0307	73.1667	289	99.8584	73.1667
	290	290	67.1925	73.3333	290	99.8585	73.3333
	291	291	67.369	73.5	291	99.8586	73.5
	292	292	67.5384	73.6667	292	99.8587	73.6667
	293	293	67.6972	73.8333	293	99.8587	73.8333
	294	294	67.8615	74	294	99.8588	74
	295	295	68.0358	74.1667	295	99.8587	74.1667
	296	296	68.1985	74.3333	296	99.8587	74.3333
	297	297	68.3771	74.5	297	99.8588	74.5
	298	298	68.5468	74.6667	298	99.8589	74.6667
	299	299	68.7067	74.8333	299	99.8588	74.8333
	300	300	68.8799	75	300	99.8585	75
	301	301	69.0411	75.1667	301	99.8583	75.1667
	302	302	69.2211	75.3333	302	99.8582	75.3333
	303	303	69.3881	75.5	303	99.8571	75.5
	304	304	69.56	75.6667	304	99.8564	75.6667
	305	305	69.7362	75.8333	305	99.8562	75.8333
	306	306	69.8993	76	306	99.8561	76
	307	307	70.0722	76.1667	307	99.8558	76.1667
	308	308	70.2444	76.3333	308	99.8553	76.3333
	309	309	70.4238	76.5	309	99.855	76.5
	310	310	70.5912	76.6667	310	99.8549	76.6667
	311	311	70.7559	76.8333	311	99.855	76.8333
	312	312	70.9314	77	312	99.8544	77
	313	313	71.103	77.1667	313	99.8538	77.1667
	314	314	71.277	77.3333	314	99.8532	77.3333
	315	315	71.4457	77.5	315	99.8531	77.5
	316	316	71.6138	77.6667	316	99.8532	77.6667
	317	317	71.7817	77.8333	317	99.8532	77.8333
	318	318	71.9607	78	318	99.8529	78
	319	319	72.1336	78.1667	319	99.8529	78.1667
	320	320	72.2968	78.3333	320	99.8522	78.3333
	321	321	72.4716	78.5	321	99.851	78.5
	322	322	72.6367	78.6667	322	99.8499	78.6667
	323	323	72.8061	78.8333	323	99.8483	78.8333
	324	324	72.9736	79	324	99.8465	79
	325	325	73.1506	79.1667	325	99.8451	79.1667
	326	326	73.3254	79.3333	326	99.8439	79.3333
	327	327	73.4957	79.5	327	99.8428	79.5
	328	328	73.6777	79.6667	328	99.8423	79.6667
	329	329	73.8482	79.8333	329	99.8414	79.8333
	330	330	74.0021	80	330	99.8405	80
	331	331	74.1842	80.1667	331	99.84	80.1667
	332	332	74.3576	80.3333	332	99.8395	80.3333
	333	333	74.5285	80.5	333	99.8386	80.5
	334	334	74.6977	80.6667	334	99.8375	80.6667
	335	335	74.8706	80.8333	335	99.8364	80.8333
	336	336	75.0378	81	336	99.8352	81
	337	337	75.2129	81.1667	337	99.8339	81.1667
	338	338	75.3829	81.3333	338	99.8327	81.3333
	339	339	75.5674	81.5	339	99.8316	81.5
	340	340	75.7383	81.6667	340	99.8308	81.6667
	341	341	75.9035	81.8333	341	99.8297	81.8333
	342	342	76.0745	82	342	99.8284	82
	343	343	76.2553	82.1667	343	99.8268	82.1667
	344	344	76.4264	82.3333	344	99.8248	82.3333
	345	345	76.5916	82.5	345	99.8227	82.5
	346	346	76.7581	82.6667	346	99.8207	82.6667
	347	347	76.9327	82.8333	347	99.8188	82.8333
	348	348	77.1035	83	348	99.8164	83
	349	349	77.2779	83.1667	349	99.8148	83.1667
	350	350	77.4507	83.3333	350	99.8136	83.3333
	351	351	77.6289	83.5	351	99.8125	83.5
	352	352	77.7879	83.6667	352	99.8127	83.6667
	353	353	77.9662	83.8333	353	99.812	83.8333
	354	354	78.1526	84	354	99.8109	84
	355	355	78.3207	84.1667	355	99.8097	84.1667
	356	356	78.4867	84.3333	356	99.8084	84.3333
	357	357	78.6609	84.5	357	99.807	84.5
	358	358	78.8311	84.6667	358	99.8053	84.6667
	359	359	79.0007	84.8333	359	99.8035	84.8333
	360	360	79.181	85	360	99.8015	85
	361	361	79.354	85.1667	361	99.7997	85.1667
	362	362	79.5309	85.3333	362	99.7978	85.3333
	363	363	79.6928	85.5	363	99.7958	85.5
	364	364	79.862	85.6667	364	99.7945	85.6667
	365	365	80.0374	85.8333	365	99.7935	85.8333
	366	366	80.2131	86	366	99.7925	86
	367	367	80.3849	86.1667	367	99.7913	86.1667
	368	368	80.5605	86.3333	368	99.7907	86.3333
	369	369	80.7335	86.5	369	99.7897	86.5
	370	370	80.9029	86.6667	370	99.7885	86.6667
	371	371	81.0721	86.8333	371	99.787	86.8333
	372	372	81.248	87	372	99.7846	87
	373	373	81.4274	87.1667	373	99.7828	87.1667
	374	374	81.5906	87.3333	374	99.781	87.3333
	375	375	81.7643	87.5	375	99.7791	87.5
	376	376	81.9384	87.6667	376	99.7766	87.6667
	377	377	82.1162	87.8333	377	99.7744	87.8333
	378	378	82.2795	88	378	99.7724	88
	379	379	82.4573	88.1667	379	99.7704	88.1667
	380	380	82.6292	88.3333	380	99.7679	88.3333
	381	381	82.8074	88.5	381	99.7657	88.5
	382	382	82.9727	88.6667	382	99.7636	88.6667
	383	383	83.1557	88.8333	383	99.7617	88.8333
	384	384	83.3263	89	384	99.7594	89
	385	385	83.4962	89.1667	385	99.7571	89.1667
	386	386	83.6633	89.3333	386	99.755	89.3333
	387	387	83.8362	89.5	387	99.753	89.5
	388	388	84.0119	89.6667	388	99.7507	89.6667
	389	389	84.1906	89.8333	389	99.7485	89.8333
	390	390	84.3486	90	390	99.7463	90
	391	391	84.5323	90.1667	391	99.7444	90.1667
	392	392	84.6977	90.3333	392	99.7428	90.3333
	393	393	84.8669	90.5	393	99.741	90.5
	394	394	85.041	90.6667	394	99.7393	90.6667
	395	395	85.2144	90.8333	395	99.7379	90.8333
	396	396	85.3878	91	396	99.7372	91
	397	397	85.5615	91.1667	397	99.7362	91.1667
	398	398	85.7295	91.3333	398	99.7349	91.3333
	399	399	85.9014	91.5	399	99.7336	91.5
	400	400	86.0725	91.6667	400	99.7323	91.6667
	401	401	86.2447	91.8333	401	99.731	91.8333
	402	402	86.414	92	402	99.7294	92
	403	403	86.5799	92.1667	403	99.7274	92.1667
	404	404	86.7528	92.3333	404	99.7253	92.3333
	405	405	86.924	92.5	405	99.7223	92.5
	406	406	87.1073	92.6667	406	99.7196	92.6667
	407	407	87.2821	92.8333	407	99.7171	92.8333
	408	408	87.4495	93	408	99.7149	93
	409	409	87.631	93.1667	409	99.7127	93.1667
	410	410	87.7962	93.3333	410	99.711	93.3333
	411	411	87.9706	93.5	411	99.7092	93.5
	412	412	88.1419	93.6667	412	99.7073	93.6667
	413	413	88.3198	93.8333	413	99.7058	93.8333
	414	414	88.4865	94	414	99.7036	94
	415	415	88.6524	94.1667	415	99.7013	94.1667
	416	416	88.8178	94.3333	416	99.6987	94.3333
	417	417	88.9915	94.5	417	99.6949	94.5
	418	418	89.17	94.6667	418	99.6919	94.6667
	419	419	89.3389	94.8333	419	99.6888	94.8333
	420	420	89.5176	95	420	99.6857	95
	421	421	89.6939	95.1667	421	99.6827	95.1667
	422	422	89.8659	95.3333	422	99.6799	95.3333
	423	423	90.0369	95.5	423	99.6771	95.5
	424	424	90.2048	95.6667	424	99.6742	95.6667
	425	425	90.3915	95.8333	425	99.6719	95.8333
	426	426	90.5544	96	426	99.6694	96
	427	427	90.7279	96.1667	427	99.6668	96.1667
	428	428	90.8927	96.3333	428	99.6641	96.3333
	429	429	91.0685	96.5	429	99.6618	96.5
	430	430	91.2363	96.6667	430	99.6597	96.6667
	431	431	91.4145	96.8333	431	99.6579	96.8333
	432	432	91.5881	97	432	99.6562	97
	433	433	91.7449	97.1667	433	99.6547	97.1667
	434	434	91.9326	97.3333	434	99.6528	97.3333
	435	435	92.0979	97.5	435	99.651	97.5
	436	436	92.2755	97.6667	436	99.6493	97.6667
	437	437	92.4481	97.8333	437	99.647	97.8333
	438	438	92.6187	98	438	99.6447	98
	439	439	92.7877	98.1667	439	99.6426	98.1667
	440	440	92.9667	98.3333	440	99.6405	98.3333
	441	441	93.1296	98.5	441	99.6376	98.5
	442	442	93.2975	98.6667	442	99.6344	98.6667
	443	443	93.4618	98.8333	443	99.6311	98.8333
	444	444	93.6414	99	444	99.628	99
	445	445	93.8137	99.1667	445	99.6245	99.1667
	446	446	93.9833	99.3333	446	99.6214	99.3333
	447	447	94.1591	99.5	447	99.6183	99.5
	448	448	94.3345	99.6667	448	99.6154	99.6667
	449	449	94.4989	99.8333	449	99.6136	99.8333
	450	450	94.6854	100	450	99.6115	100
	451	451	94.8533	100.167	451	99.6094	100.167
	452	452	95.018	100.333	452	99.6071	100.333
	453	453	95.1952	100.5	453	99.6054	100.5
	454	454	95.3532	100.667	454	99.6035	100.667
	455	455	95.5373	100.833	455	99.6017	100.833
	456	456	95.7103	101	456	99.5996	101
	457	457	95.8791	101.167	457	99.5964	101.167
	458	458	96.0525	101.333	458	99.5933	101.333
	459	459	96.2271	101.5	459	99.5902	101.5
	460	460	96.4042	101.667	460	99.5872	101.667
	461	461	96.5729	101.833	461	99.5829	101.833
	462	462	96.7318	102	462	99.5795	102
	463	463	96.9121	102.167	463	99.5766	102.167
	464	464	97.0849	102.333	464	99.5739	102.333
	465	465	97.2584	102.5	465	99.5717	102.5
	466	466	97.4347	102.667	466	99.5693	102.667
	467	467	97.6073	102.833	467	99.5668	102.833
	468	468	97.7693	103	468	99.5642	103
	469	469	97.9465	103.167	469	99.5614	103.167
	470	470	98.1127	103.333	470	99.5582	103.333
	471	471	98.2856	103.5	471	99.555	103.5
	472	472	98.4637	103.667	472	99.552	103.667
	473	473	98.6241	103.833	473	99.5492	103.833
	474	474	98.8014	104	474	99.5461	104
	475	475	98.9726	104.167	475	99.5431	104.167
	476	476	99.1466	104.333	476	99.5399	104.333
	477	477	99.3246	104.5	477	99.5368	104.5
	478	478	99.4874	104.667	478	99.5339	104.667
	479	479	99.6604	104.833	479	99.5307	104.833
	480	480	99.8304	105	480	99.5273	105
	481	481	100.004	105.167	481	99.5244	105.167
	482	482	100.188	105.333	482	99.5213	105.333
	483	483	100.356	105.5	483	99.5185	105.5
	484	484	100.531	105.667	484	99.5155	105.667
	485	485	100.696	105.833	485	99.5121	105.833
	486	486	100.868	106	486	99.509	106
	487	487	101.041	106.167	487	99.5059	106.167
	488	488	101.22	106.333	488	99.5029	106.333
	489	489	101.387	106.5	489	99.4999	106.5
	490	490	101.556	106.667	490	99.4964	106.667
	491	491	101.736	106.833	491	99.493	106.833
	492	492	101.903	107	492	99.4893	107
	493	493	102.068	107.167	493	99.4853	107.167
	494	494	102.245	107.333	494	99.4813	107.333
	495	495	102.415	107.5	495	99.4777	107.5
	496	496	102.596	107.667	496	99.4745	107.667
	497	497	102.752	107.833	497	99.4712	107.833
	498	498	102.936	108	498	99.4677	108
	499	499	103.1	108.167	499	99.464	108.167
	500	500	103.277	108.333	500	99.4606	108.333
	501	501	103.446	108.5	501	99.4575	108.5
	502	502	103.613	108.667	502	99.4539	108.667
	503	503	103.789	108.833	503	99.4502	108.833
	504	504	103.959	109	504	99.4464	109
	505	505	104.138	109.167	505	99.4426	109.167
	506	506	104.305	109.333	506	99.4393	109.333
	507	507	104.476	109.5	507	99.4359	109.5
	508	508	104.646	109.667	508	99.4323	109.667
	509	509	104.826	109.833	509	99.4284	109.833
	510	510	104.994	110	510	99.4249	110
	511	511	105.162	110.167	511	99.4214	110.167
	512	512	105.339	110.333	512	99.4178	110.333
	513	513	105.506	110.5	513	99.414	110.5
	514	514	105.687	110.667	514	99.4099	110.667
	515	515	105.859	110.833	515	99.406	110.833
	516	516	106.03	111	516	99.4025	111
	517	517	106.199	111.167	517	99.3989	111.167
	518	518	106.374	111.333	518	99.395	111.333
	519	519	106.547	111.5	519	99.391	111.5
	520	520	106.714	111.667	520	99.3871	111.667
	521	521	106.881	111.833	521	99.3834	111.833
	522	522	107.054	112	522	99.3796	112
	523	523	107.227	112.167	523	99.3754	112.167
	524	524	107.403	112.333	524	99.3712	112.333
	525	525	107.571	112.5	525	99.3672	112.5
	526	526	107.734	112.667	526	99.3637	112.667
	527	527	107.909	112.833	527	99.36	112.833
	528	528	108.081	113	528	99.3559	113
	529	529	108.26	113.167	529	99.3518	113.167
	530	530	108.433	113.333	530	99.3485	113.333
	531	531	108.597	113.5	531	99.3448	113.5
	532	532	108.775	113.667	532	99.3407	113.667
	533	533	108.944	113.833	533	99.3363	113.833
	534	534	109.113	114	534	99.3322	114
	535	535	109.289	114.167	535	99.3282	114.167
	536	536	109.455	114.333	536	99.3238	114.333
	537	537	109.632	114.5	537	99.319	114.5
	538	538	109.801	114.667	538	99.3144	114.667
	539	539	109.988	114.833	539	99.31	114.833
	540	540	110.155	115	540	99.3057	115
	541	541	110.309	115.167	541	99.3012	115.167
	542	542	110.494	115.333	542	99.2968	115.333
	543	543	110.661	115.5	543	99.2926	115.5
	544	544	110.835	115.667	544	99.2884	115.667
	545	545	111.003	115.833	545	99.2842	115.833
	546	546	111.175	116	546	99.2802	116
	547	547	111.359	116.167	547	99.2758	116.167
	548	548	111.522	116.333	548	99.2713	116.333
	549	549	111.696	116.5	549	99.2667	116.5
	550	550	111.878	116.667	550	99.2626	116.667
	551	551	112.04	116.833	551	99.2585	116.833
	552	552	112.204	117	552	99.2546	117
	553	553	112.38	117.167	553	99.2509	117.167
	554	554	112.544	117.333	554	99.2474	117.333
	555	555	112.713	117.5	555	99.2432	117.5
	556	556	112.894	117.667	556	99.2391	117.667
	557	557	113.063	117.833	557	99.2351	117.833
	558	558	113.244	118	558	99.231	118
	559	559	113.415	118.167	559	99.2265	118.167
	560	560	113.588	118.333	560	99.2222	118.333
	561	561	113.752	118.5	561	99.2176	118.5
	562	562	113.929	118.667	562	99.213	118.667
	563	563	114.096	118.833	563	99.2086	118.833
	564	564	114.274	119	564	99.2038	119
	565	565	114.439	119.167	565	99.1987	119.167
	566	566	114.608	119.333	566	99.1937	119.333
	567	567	114.783	119.5	567	99.1883	119.5
	568	568	114.948	119.667	568	99.1827	119.667
	569	569	115.12	119.833	569	99.1773	119.833
	570	570	115.305	120	570	99.172	120
	571	571	115.471	120.167	571	99.1666	120.167
	572	572	115.639	120.333	572	99.1613	120.333
	573	573	115.807	120.5	573	99.1558	120.5
	574	574	115.974	120.667	574	99.1504	120.667
	575	575	116.143	120.833	575	99.1457	120.833
	576	576	116.307	121	576	99.1406	121
	577	577	116.484	121.167	577	99.1352	121.167
	578	578	116.662	121.333	578	99.1299	121.333
	579	579	116.837	121.5	579	99.1248	121.5
	580	580	117.003	121.667	580	99.1197	121.667
	581	581	117.177	121.833	581	99.1146	121.833
	582	582	117.35	122	582	99.1092	122
	583	583	117.526	122.167	583	99.1037	122.167
	584	584	117.691	122.333	584	99.0984	122.333
	585	585	117.862	122.5	585	99.093	122.5
	586	586	118.03	122.667	586	99.0877	122.667
	587	587	118.208	122.833	587	99.0817	122.833
	588	588	118.378	123	588	99.076	123
	589	589	118.552	123.167	589	99.0704	123.167
	590	590	118.733	123.333	590	99.0648	123.333
	591	591	118.904	123.5	591	99.0587	123.5
	592	592	119.071	123.667	592	99.0528	123.667
	593	593	119.241	123.833	593	99.047	123.833
	594	594	119.407	124	594	99.0414	124
	595	595	119.58	124.167	595	99.036	124.167
	596	596	119.747	124.333	596	99.0309	124.333
	597	597	119.924	124.5	597	99.0256	124.5
	598	598	120.096	124.667	598	99.02	124.667
	599	599	120.265	124.833	599	99.0148	124.833
	600	600	120.439	125	600	99.0094	125
	601	601	120.616	125.167	601	99.0037	125.167
	602	602	120.782	125.333	602	98.9978	125.333
	603	603	120.945	125.5	603	98.9914	125.5
	604	604	121.128	125.667	604	98.9854	125.667
	605	605	121.303	125.833	605	98.9796	125.833
	606	606	121.474	126	606	98.9737	126
	607	607	121.645	126.167	607	98.9676	126.167
	608	608	121.819	126.333	608	98.9615	126.333
	609	609	121.984	126.5	609	98.9554	126.5
	610	610	122.156	126.667	610	98.9494	126.667
	611	611	122.327	126.833	611	98.9427	126.833
	612	612	122.507	127	612	98.9362	127
	613	613	122.675	127.167	613	98.9299	127.167
	614	614	122.847	127.333	614	98.9239	127.333
	615	615	123.015	127.5	615	98.9188	127.5
	616	616	123.174	127.667	616	98.914	127.667
	617	617	123.35	127.833	617	98.9094	127.833
	618	618	123.521	128	618	98.9046	128
	619	619	123.693	128.167	619	98.9008	128.167
	620	620	123.869	128.333	620	98.896	128.333
	621	621	124.043	128.5	621	98.8907	128.5
	622	622	124.216	128.667	622	98.885	128.667
	623	623	124.393	128.833	623	98.8779	128.833
	624	624	124.558	129	624	98.8715	129
	625	625	124.729	129.167	625	98.8649	129.167
	626	626	124.901	129.333	626	98.858	129.333
	627	627	125.067	129.5	627	98.8508	129.5
	628	628	125.238	129.667	628	98.8438	129.667
	629	629	125.412	129.833	629	98.8366	129.833
	630	630	125.583	130	630	98.8293	130
	631	631	125.759	130.167	631	98.8221	130.167
	632	632	125.938	130.333	632	98.8148	130.333
	633	633	126.111	130.5	633	98.8073	130.5
	634	634	126.262	130.667	634	98.7999	130.667
	635	635	126.436	130.833	635	98.7927	130.833
	636	636	126.614	131	636	98.7853	131
	637	637	126.784	131.167	637	98.7778	131.167
	638	638	126.956	131.333	638	98.7704	131.333
	639	639	127.125	131.5	639	98.7634	131.5
	640	640	127.302	131.667	640	98.7562	131.667
	641	641	127.483	131.833	641	98.7489	131.833
	642	642	127.641	132	642	98.7413	132
	643	643	127.817	132.167	643	98.7341	132.167
	644	644	127.978	132.333	644	98.7267	132.333
	645	645	128.163	132.5	645	98.7194	132.5
	646	646	128.328	132.667	646	98.7121	132.667
	647	647	128.495	132.833	647	98.7048	132.833
	648	648	128.676	133	648	98.6976	133
	649	649	128.84	133.167	649	98.6905	133.167
	650	650	129.018	133.333	650	98.6835	133.333
	651	651	129.197	133.5	651	98.6765	133.5
	652	652	129.355	133.667	652	98.6693	133.667
	653	653	129.526	133.833	653	98.6619	133.833
	654	654	129.7	134	654	98.6546	134
	655	655	129.87	134.167	655	98.6475	134.167
	656	656	130.039	134.333	656	98.6397	134.333
	657	657	130.219	134.5	657	98.6319	134.5
	658	658	130.391	134.667	658	98.6242	134.667
	659	659	130.552	134.833	659	98.6166	134.833
	660	660	130.733	135	660	98.6091	135
	661	661	130.907	135.167	661	98.6018	135.167
	662	662	131.071	135.333	662	98.5942	135.333
	663	663	131.249	135.5	663	98.5865	135.5
	664	664	131.412	135.667	664	98.5791	135.667
	665	665	131.588	135.833	665	98.5716	135.833
	666	666	131.761	136	666	98.5641	136
	667	667	131.933	136.167	667	98.5564	136.167
	668	668	132.101	136.333	668	98.5484	136.333
	669	669	132.264	136.5	669	98.5405	136.5
	670	670	132.445	136.667	670	98.5328	136.667
	671	671	132.614	136.833	671	98.5251	136.833
	672	672	132.791	137	672	98.5172	137
	673	673	132.959	137.167	673	98.5092	137.167
	674	674	133.135	137.333	674	98.5011	137.333
	675	675	133.296	137.5	675	98.4932	137.5
	676	676	133.471	137.667	676	98.4854	137.667
	677	677	133.646	137.833	677	98.4774	137.833
	678	678	133.814	138	678	98.4693	138
	679	679	133.995	138.167	679	98.461	138.167
	680	680	134.179	138.333	680	98.4529	138.333
	681	681	134.331	138.5	681	98.4449	138.5
	682	682	134.508	138.667	682	98.4368	138.667
	683	683	134.674	138.833	683	98.4283	138.833
	684	684	134.845	139	684	98.4198	139
	685	685	135.013	139.167	685	98.4115	139.167
	686	686	135.192	139.333	686	98.4032	139.333
	687	687	135.358	139.5	687	98.395	139.5
	688	688	135.532	139.667	688	98.3865	139.667
	689	689	135.711	139.833	689	98.378	139.833
	690	690	135.877	140	690	98.3694	140
	691	691	136.048	140.167	691	98.361	140.167
	692	692	136.219	140.333	692	98.3526	140.333
	693	693	136.392	140.5	693	98.3441	140.5
	694	694	136.566	140.667	694	98.3354	140.667
	695	695	136.741	140.833	695	98.3266	140.833
	696	696	136.904	141	696	98.3181	141
	697	697	137.079	141.167	697	98.3096	141.167
	698	698	137.255	141.333	698	98.3011	141.333
	699	699	137.424	141.5	699	98.2927	141.5
	700	700	137.587	141.667	700	98.2842	141.667
	701	701	137.772	141.833	701	98.2753	141.833
	702	702	137.93	142	702	98.2664	142
	703	703	138.11	142.167	703	98.2576	142.167
	704	704	138.28	142.333	704	98.2487	142.333
	705	705	138.45	142.5	705	98.2402	142.5
	706	706	138.624	142.667	706	98.2314	142.667
	707	707	138.803	142.833	707	98.2222	142.833
	708	708	138.969	143	708	98.2127	143
	709	709	139.131	143.167	709	98.2029	143.167
	710	710	139.311	143.333	710	98.1931	143.333
	711	711	139.484	143.5	711	98.1833	143.5
	712	712	139.654	143.667	712	98.1724	143.667
	713	713	139.827	143.833	713	98.1618	143.833
	714	714	139.998	144	714	98.1522	144
	715	715	140.164	144.167	715	98.1434	144.167
	716	716	140.325	144.333	716	98.1364	144.333
	717	717	140.509	144.5	717	98.129	144.5
	718	718	140.689	144.667	718	98.1213	144.667
	719	719	140.856	144.833	719	98.1133	144.833
	720	720	141.029	145	720	98.1051	145
	721	721	141.207	145.167	721	98.0969	145.167
	722	722	141.366	145.333	722	98.0879	145.333
	723	723	141.53	145.5	723	98.0785	145.5
	724	724	141.71	145.667	724	98.0689	145.667
	725	725	141.886	145.833	725	98.0572	145.833
	726	726	142.056	146	726	98.0464	146
	727	727	142.231	146.167	727	98.036	146.167
	728	728	142.404	146.333	728	98.0256	146.333
	729	729	142.572	146.5	729	98.0154	146.5
	730	730	142.742	146.667	730	98.0053	146.667
	731	731	142.918	146.833	731	97.995	146.833
	732	732	143.094	147	732	97.9847	147
	733	733	143.263	147.167	733	97.9749	147.167
	734	734	143.431	147.333	734	97.9647	147.333
	735	735	143.603	147.5	735	97.9542	147.5
	736	736	143.778	147.667	736	97.9436	147.667
	737	737	143.95	147.833	737	97.9334	147.833
	738	738	144.12	148	738	97.9233	148
	739	739	144.288	148.167	739	97.913	148.167
	740	740	144.459	148.333	740	97.9028	148.333
	741	741	144.636	148.5	741	97.8933	148.5
	742	742	144.803	148.667	742	97.8835	148.667
	743	743	144.976	148.833	743	97.8737	148.833
	744	744	145.137	149	744	97.864	149
	745	745	145.314	149.167	745	97.8544	149.167
	746	746	145.494	149.333	746	97.8446	149.333
	747	747	145.663	149.5	747	97.8343	149.5
	748	748	145.832	149.667	748	97.8239	149.667
	749	749	146.001	149.833	749	97.8126	149.833
	750	750	146.182	150	750	97.801	150
	751	751	146.352	150.167	751	97.7891	150.167
	752	752	146.518	150.333	752	97.777	150.333
	753	753	146.691	150.5	753	97.7633	150.5
	754	754	146.86	150.667	754	97.7501	150.667
	755	755	147.03	150.833	755	97.737	150.833
	756	756	147.205	151	756	97.724	151
	757	757	147.375	151.167	757	97.7111	151.167
	758	758	147.545	151.333	758	97.6985	151.333
	759	759	147.731	151.5	759	97.6858	151.5
	760	760	147.897	151.667	760	97.6731	151.667
	761	761	148.065	151.833	761	97.6613	151.833
	762	762	148.237	152	762	97.6494	152
	763	763	148.398	152.167	763	97.6376	152.167
	764	764	148.59	152.333	764	97.6258	152.333
	765	765	148.754	152.5	765	97.6139	152.5
	766	766	148.918	152.667	766	97.6019	152.667
	767	767	149.094	152.833	767	97.59	152.833
	768	768	149.267	153	768	97.5782	153
	769	769	149.438	153.167	769	97.566	153.167
	770	770	149.614	153.333	770	97.5537	153.333
	771	771	149.782	153.5	771	97.5414	153.5
	772	772	149.954	153.667	772	97.5292	153.667
	773	773	150.121	153.833	773	97.517	153.833
	774	774	150.29	154	774	97.5048	154
	775	775	150.456	154.167	775	97.4926	154.167
	776	776	150.63	154.333	776	97.4803	154.333
	777	777	150.808	154.5	777	97.4678	154.5
	778	778	150.981	154.667	778	97.4554	154.667
	779	779	151.148	154.833	779	97.4429	154.833
	780	780	151.322	155	780	97.4304	155
	781	781	151.505	155.167	781	97.4171	155.167
	782	782	151.676	155.333	782	97.404	155.333
	783	783	151.852	155.5	783	97.391	155.5
	784	784	152.008	155.667	784	97.3781	155.667
	785	785	152.183	155.833	785	97.365	155.833
	786	786	152.36	156	786	97.3521	156
	787	787	152.534	156.167	787	97.339	156.167
	788	788	152.704	156.333	788	97.3259	156.333
	789	789	152.87	156.5	789	97.3127	156.5
	790	790	153.036	156.667	790	97.2998	156.667
	791	791	153.217	156.833	791	97.2865	156.833
	792	792	153.393	157	792	97.2729	157
	793	793	153.558	157.167	793	97.2592	157.167
	794	794	153.736	157.333	794	97.2455	157.333
	795	795	153.902	157.5	795	97.2321	157.5
	796	796	154.071	157.667	796	97.2187	157.667
	797	797	154.241	157.833	797	97.2051	157.833
	798	798	154.413	158	798	97.1914	158
	799	799	154.585	158.167	799	97.1777	158.167
	800	800	154.765	158.333	800	97.1639	158.333
	801	801	154.937	158.5	801	97.1502	158.5
	802	802	155.101	158.667	802	97.1362	158.667
	803	803	155.27	158.833	803	97.1222	158.833
	804	804	155.452	159	804	97.108	159
	805	805	155.617	159.167	805	97.0938	159.167
	806	806	155.789	159.333	806	97.0798	159.333
	807	807	155.967	159.5	807	97.0659	159.5
	808	808	156.136	159.667	808	97.052	159.667
	809	809	156.305	159.833	809	97.0378	159.833
	810	810	156.477	160	810	97.0232	160
	811	811	156.654	160.167	811	97.0086	160.167
	812	812	156.826	160.333	812	96.9941	160.333
	813	813	156.992	160.5	813	96.9797	160.5
	814	814	157.167	160.667	814	96.9644	160.667
	815	815	157.336	160.833	815	96.9494	160.833
	816	816	157.512	161	816	96.9344	161
	817	817	157.683	161.167	817	96.9194	161.167
	818	818	157.851	161.333	818	96.9046	161.333
	819	819	158.023	161.5	819	96.8898	161.5
	820	820	158.202	161.667	820	96.8747	161.667
	821	821	158.368	161.833	821	96.8594	161.833
	822	822	158.54	162	822	96.8443	162
	823	823	158.701	162.167	823	96.8292	162.167
	824	824	158.889	162.333	824	96.8142	162.333
	825	825	159.055	162.5	825	96.7993	162.5
	826	826	159.236	162.667	826	96.7842	162.667
	827	827	159.399	162.833	827	96.7688	162.833
	828	828	159.579	163	828	96.7532	163
	829	829	159.744	163.167	829	96.7375	163.167
	830	830	159.922	163.333	830	96.7217	163.333
	831	831	160.098	163.5	831	96.706	163.5
	832	832	160.26	163.667	832	96.6903	163.667
	833	833	160.428	163.833	833	96.6744	163.833
	834	834	160.605	164	834	96.6583	164
	835	835	160.766	164.167	835	96.6422	164.167
	836	836	160.942	164.333	836	96.6262	164.333
	837	837	161.129	164.5	837	96.6102	164.5
	838	838	161.295	164.667	838	96.5934	164.667
	839	839	161.461	164.833	839	96.5768	164.833
	840	840	161.637	165	840	96.5603	165
	841	841	161.813	165.167	841	96.5438	165.167
	842	842	161.986	165.333	842	96.5273	165.333
	843	843	162.15	165.5	843	96.5111	165.5
	844	844	162.334	165.667	844	96.4948	165.667
	845	845	162.502	165.833	845	96.4784	165.833
	846	846	162.667	166	846	96.4618	166
	847	847	162.841	166.167	847	96.4451	166.167
	848	848	163.017	166.333	848	96.4283	166.333
	849	849	163.191	166.5	849	96.4115	166.5
	850	850	163.358	166.667	850	96.3937	166.667
	851	851	163.532	166.833	851	96.3762	166.833
	852	852	163.705	167	852	96.3588	167
	853	853	163.869	167.167	853	96.3416	167.167
	854	854	164.037	167.333	854	96.3244	167.333
	855	855	164.213	167.5	855	96.3073	167.5
	856	856	164.385	167.667	856	96.2904	167.667
	857	857	164.569	167.833	857	96.2737	167.833
	858	858	164.736	168	858	96.2574	168
	859	859	164.904	168.167	859	96.2409	168.167
	860	860	165.073	168.333	860	96.2239	168.333
	861	861	165.25	168.5	861	96.2067	168.5
	862	862	165.419	168.667	862	96.1892	168.667
	863	863	165.584	168.833	863	96.1717	168.833
	864	864	165.762	169	864	96.1541	169
	865	865	165.932	169.167	865	96.1363	169.167
	866	866	166.107	169.333	866	96.1177	169.333
	867	867	166.282	169.5	867	96.0991	169.5
	868	868	166.449	169.667	868	96.0807	169.667
	869	869	166.624	169.833	869	96.0623	169.833
	870	870	166.785	170	870	96.0432	170
	871	871	166.951	170.167	871	96.024	170.167
	872	872	167.127	170.333	872	96.005	170.333
	873	873	167.307	170.5	873	95.9859	170.5
	874	874	167.487	170.667	874	95.967	170.667
	875	875	167.654	170.833	875	95.9476	170.833
	876	876	167.82	171	876	95.9282	171
	877	877	168.001	171.167	877	95.9088	171.167
	878	878	168.166	171.333	878	95.89	171.333
	879	879	168.335	171.5	879	95.8709	171.5
	880	880	168.499	171.667	880	95.8517	171.667
	881	881	168.678	171.833	881	95.8323	171.833
	882	882	168.857	172	882	95.8127	172
	883	883	169.03	172.167	883	95.7931	172.167
	884	884	169.195	172.333	884	95.7736	172.333
	885	885	169.369	172.5	885	95.7539	172.5
	886	886	169.543	172.667	886	95.7341	172.667
	887	887	169.714	172.833	887	95.7137	172.833
	888	888	169.886	173	888	95.6934	173
	889	889	170.062	173.167	889	95.6733	173.167
	890	890	170.231	173.333	890	95.6531	173.333
	891	891	170.401	173.5	891	95.6325	173.5
	892	892	170.574	173.667	892	95.6118	173.667
	893	893	170.737	173.833	893	95.5911	173.833
	894	894	170.911	174	894	95.5704	174
	895	895	171.083	174.167	895	95.5498	174.167
	896	896	171.246	174.333	896	95.5292	174.333
	897	897	171.427	174.5	897	95.5083	174.5
	898	898	171.6	174.667	898	95.4873	174.667
	899	899	171.762	174.833	899	95.4663	174.833
	900	900	171.935	175	900	95.4453	175
	901	901	172.117	175.167	901	95.4245	175.167
	902	902	172.289	175.333	902	95.4037	175.333
	903	903	172.462	175.5	903	95.3826	175.5
	904	904	172.639	175.667	904	95.3613	175.667
	905	905	172.803	175.833	905	95.3399	175.833
	906	906	172.983	176	906	95.3185	176
	907	907	173.148	176.167	907	95.2969	176.167
	908	908	173.325	176.333	908	95.2754	176.333
	909	909	173.507	176.5	909	95.2537	176.5
	910	910	173.682	176.667	910	95.2317	176.667
	911	911	173.842	176.833	911	95.2098	176.833
	912	912	174.017	177	912	95.188	177
	913	913	174.195	177.167	913	95.1662	177.167
	914	914	174.359	177.333	914	95.1443	177.333
	915	915	174.528	177.5	915	95.1222	177.5
	916	916	174.698	177.667	916	95.0998	177.667
	917	917	174.873	177.833	917	95.0771	177.833
	918	918	175.046	178	918	95.0543	178
	919	919	175.224	178.167	919	95.0314	178.167
	920	920	175.399	178.333	920	95.0087	178.333
	921	921	175.559	178.5	921	94.9861	178.5
	922	922	175.726	178.667	922	94.9633	178.667
	923	923	175.903	178.833	923	94.9402	178.833
	924	924	176.071	179	924	94.9169	179
	925	925	176.242	179.167	925	94.8937	179.167
	926	926	176.411	179.333	926	94.8703	179.333
	927	927	176.587	179.5	927	94.8461	179.5
	928	928	176.765	179.667	928	94.8222	179.667
	929	929	176.937	179.833	929	94.7983	179.833
	930	930	177.101	180	930	94.7744	180
	931	931	177.282	180.167	931	94.7505	180.167
	932	932	177.439	180.333	932	94.7265	180.333
	933	933	177.619	180.5	933	94.7023	180.5
	934	934	177.79	180.667	934	94.6779	180.667
	935	935	177.95	180.833	935	94.6535	180.833
	936	936	178.128	181	936	94.6291	181
	937	937	178.303	181.167	937	94.6049	181.167
	938	938	178.48	181.333	938	94.5806	181.333
	939	939	178.646	181.5	939	94.5559	181.5
	940	940	178.826	181.667	940	94.5312	181.667
	941	941	178.997	181.833	941	94.5065	181.833
	942	942	179.16	182	942	94.4817	182
	943	943	179.331	182.167	943	94.4568	182.167
	944	944	179.503	182.333	944	94.4321	182.333
	945	945	179.682	182.5	945	94.4071	182.5
	946	946	179.846	182.667	946	94.3819	182.667
	947	947	180.013	182.833	947	94.3564	182.833
	948	948	180.19	183	948	94.3309	183
	949	949	180.358	183.167	949	94.3054	183.167
	950	950	180.538	183.333	950	94.28	183.333
	951	951	180.708	183.5	951	94.2539	183.5
	952	952	180.89	183.667	952	94.2275	183.667
	953	953	181.055	183.833	953	94.2012	183.833
	954	954	181.232	184	954	94.175	184
	955	955	181.4	184.167	955	94.1489	184.167
	956	956	181.568	184.333	956	94.1225	184.333
	957	957	181.747	184.5	957	94.0961	184.5
	958	958	181.919	184.667	958	94.0695	184.667
	959	959	182.085	184.833	959	94.0428	184.833
	960	960	182.259	185	960	94.0162	185
	961	961	182.43	185.167	961	93.9896	185.167
	962	962	182.6	185.333	962	93.9628	185.333
	963	963	182.773	185.5	963	93.9357	185.5
	964	964	182.94	185.667	964	93.908	185.667
	965	965	183.118	185.833	965	93.8805	185.833
	966	966	183.291	186	966	93.8532	186
	967	967	183.462	186.167	967	93.8259	186.167
	968	968	183.638	186.333	968	93.7982	186.333
	969	969	183.807	186.5	969	93.7704	186.5
	970	970	183.974	186.667	970	93.7423	186.667
	971	971	184.146	186.833	971	93.7141	186.833
	972	972	184.326	187	972	93.6859	187
	973	973	184.492	187.167	973	93.6577	187.167
	974	974	184.668	187.333	974	93.6296	187.333
	975	975	184.84	187.5	975	93.6013	187.5
	976	976	185.012	187.667	976	93.5725	187.667
	977	977	185.184	187.833	977	93.5437	187.833
	978	978	185.354	188	978	93.5149	188
	979	979	185.52	188.167	979	93.4861	188.167
	980	980	185.699	188.333	980	93.4568	188.333
	981	981	185.867	188.5	981	93.4277	188.5
	982	982	186.03	188.667	982	93.3984	188.667
	983	983	186.202	188.833	983	93.3689	188.833
	984	984	186.379	189	984	93.3394	189
	985	985	186.55	189.167	985	93.3098	189.167
	986	986	186.727	189.333	986	93.2803	189.333
	987	987	186.895	189.5	987	93.2508	189.5
	988	988	187.072	189.667	988	93.2207	189.667
	989	989	187.246	189.833	989	93.1904	189.833
	990	990	187.417	190	990	93.16	190
	991	991	187.587	190.167	991	93.1296	190.167
	992	992	187.752	190.333	992	93.099	190.333
	993	993	187.932	190.5	993	93.0688	190.5
	994	994	188.102	190.667	994	93.0386	190.667
	995	995	188.271	190.833	995	93.0082	190.833
	996	996	188.446	191	996	92.9775	191
	997	997	188.62	191.167	997	92.9465	191.167
	998	998	188.787	191.333	998	92.9154	191.333
	999	999	188.952	191.5	999	92.8842	191.5
	1000	1000	189.12	191.667	1000	92.852	191.667
	1001	1001	189.302	191.833	1001	92.8199	191.833
	1002	1002	189.475	192	1002	92.7878	192
	1003	1003	189.644	192.167	1003	92.7556	192.167
	1004	1004	189.824	192.333	1004	92.7234	192.333
	1005	1005	189.997	192.5	1005	92.6913	192.5
	1006	1006	190.163	192.667	1006	92.6595	192.667
	1007	1007	190.338	192.833	1007	92.6277	192.833
	1008	1008	190.504	193	1008	92.5957	193
	1009	1009	190.681	193.167	1009	92.5633	193.167
	1010	1010	190.852	193.333	1010	92.5307	193.333
	1011	1011	191.025	193.5	1011	92.498	193.5
	1012	1012	191.201	193.667	1012	92.4649	193.667
	1013	1013	191.368	193.833	1013	92.4319	193.833
	1014	1014	191.536	194	1014	92.3986	194
	1015	1015	191.715	194.167	1015	92.3651	194.167
	1016	1016	191.885	194.333	1016	92.3313	194.333
	1017	1017	192.061	194.5	1017	92.2975	194.5
	1018	1018	192.228	194.667	1018	92.2638	194.667
	1019	1019	192.395	194.833	1019	92.2302	194.833
	1020	1020	192.559	195	1020	92.1956	195
	1021	1021	192.742	195.167	1021	92.1611	195.167
	1022	1022	192.922	195.333	1022	92.1266	195.333
	1023	1023	193.085	195.5	1023	92.0919	195.5
	1024	1024	193.249	195.667	1024	92.0572	195.667
	1025	1025	193.428	195.833	1025	92.0223	195.833
	1026	1026	193.595	196	1026	91.9873	196
	1027	1027	193.768	196.167	1027	91.952	196.167
	1028	1028	193.946	196.333	1028	91.917	196.333
	1029	1029	194.111	196.5	1029	91.8815	196.5
	1030	1030	194.286	196.667	1030	91.846	196.667
	1031	1031	194.455	196.833	1031	91.8106	196.833
	1032	1032	194.632	197	1032	91.775	197
	1033	1033	194.801	197.167	1033	91.7388	197.167
	1034	1034	194.971	197.333	1034	91.7025	197.333
	1035	1035	195.142	197.5	1035	91.666	197.5
	1036	1036	195.307	197.667	1036	91.6297	197.667
	1037	1037	195.488	197.833	1037	91.5927	197.833
	1038	1038	195.652	198	1038	91.5556	198
	1039	1039	195.834	198.167	1039	91.5181	198.167
	1040	1040	196	198.333	1040	91.4806	198.333
	1041	1041	196.177	198.5	1041	91.4423	198.5
	1042	1042	196.344	198.667	1042	91.4044	198.667
	1043	1043	196.51	198.833	1043	91.3666	198.833
	1044	1044	196.681	199	1044	91.3288	199
	1045	1045	196.862	199.167	1045	91.291	199.167
	1046	1046	197.034	199.333	1046	91.2534	199.333
	1047	1047	197.201	199.5	1047	91.2157	199.5
	1048	1048	197.373	199.667	1048	91.1777	199.667
	1049	1049	197.543	199.833	1049	91.1394	199.833
	1050	1050	197.713	200	1050	91.1007	200
	1051	1051	197.89	200.167	1051	91.0619	200.167
	1052	1052	198.053	200.333	1052	91.0232	200.333
	1053	1053	198.228	200.5	1053	90.9829	200.5
	1054	1054	198.396	200.667	1054	90.943	200.667
	1055	1055	198.569	200.833	1055	90.9032	200.833
	1056	1056	198.735	201	1056	90.8633	201
	1057	1057	198.913	201.167	1057	90.8233	201.167
	1058	1058	199.09	201.333	1058	90.7833	201.333
	1059	1059	199.251	201.5	1059	90.7429	201.5
	1060	1060	199.424	201.667	1060	90.7023	201.667
	1061	1061	199.608	201.833	1061	90.6614	201.833
	1062	1062	199.778	202	1062	90.6206	202
	1063	1063	199.946	202.167	1063	90.5797	202.167
	1064	1064	200.117	202.333	1064	90.5389	202.333
	1065	1065	200.286	202.5	1065	90.4977	202.5
	1066	1066	200.463	202.667	1066	90.4563	202.667
	1067	1067	200.629	202.833	1067	90.4147	202.833
	1068	1068	200.804	203	1068	90.3731	203
	1069	1069	200.977	203.167	1069	90.3311	203.167
	1070	1070	201.145	203.333	1070	90.2892	203.333
	1071	1071	201.318	203.5	1071	90.2473	203.5
	1072	1072	201.486	203.667	1072	90.2054	203.667
	1073	1073	201.654	203.833	1073	90.1627	203.833
	1074	1074	201.823	204	1074	90.1198	204
	1075	1075	201.999	204.167	1075	90.0768	204.167
	1076	1076	202.173	204.333	1076	90.0339	204.333
	1077	1077	202.344	204.5	1077	89.9903	204.5
	1078	1078	202.526	204.667	1078	89.9469	204.667
	1079	1079	202.699	204.833	1079	89.9032	204.833
	1080	1080	202.86	205	1080	89.8592	205
	1081	1081	203.029	205.167	1081	89.815	205.167
	1082	1082	203.206	205.333	1082	89.7707	205.333
	1083	1083	203.381	205.5	1083	89.7264	205.5
	1084	1084	203.545	205.667	1084	89.682	205.667
	1085	1085	203.714	205.833	1085	89.6373	205.833
	1086	1086	203.888	206	1086	89.5926	206
	1087	1087	204.056	206.167	1087	89.5477	206.167
	1088	1088	204.232	206.333	1088	89.5027	206.333
	1089	1089	204.404	206.5	1089	89.4576	206.5
	1090	1090	204.575	206.667	1090	89.4124	206.667
	1091	1091	204.748	206.833	1091	89.367	206.833
	1092	1092	204.918	207	1092	89.3215	207
	1093	1093	205.084	207.167	1093	89.2757	207.167
	1094	1094	205.258	207.333	1094	89.2286	207.333
	1095	1095	205.418	207.5	1095	89.182	207.5
	1096	1096	205.603	207.667	1096	89.1353	207.667
	1097	1097	205.78	207.833	1097	89.0883	207.833
	1098	1098	205.947	208	1098	89.0406	208
	1099	1099	206.113	208.167	1099	88.9928	208.167
	1100	1100	206.29	208.333	1100	88.9449	208.333
	1101	1101	206.464	208.5	1101	88.8973	208.5
	1102	1102	206.624	208.667	1102	88.849	208.667
	1103	1103	206.799	208.833	1103	88.8008	208.833
	1104	1104	206.979	209	1104	88.7524	209
	1105	1105	207.143	209.167	1105	88.7038	209.167
	1106	1106	207.316	209.333	1106	88.6549	209.333
	1107	1107	207.489	209.5	1107	88.606	209.5
	1108	1108	207.664	209.667	1108	88.5572	209.667
	1109	1109	207.838	209.833	1109	88.5082	209.833
	1110	1110	208.006	210	1110	88.4592	210
	1111	1111	208.178	210.167	1111	88.4103	210.167
	1112	1112	208.347	210.333	1112	88.3614	210.333
	1113	1113	208.522	210.5	1113	88.3122	210.5
	1114	1114	208.685	210.667	1114	88.2625	210.667
	1115	1115	208.861	210.833	1115	88.2125	210.833
	1116	1116	209.033	211	1116	88.1623	211
	1117	1117	209.207	211.167	1117	88.112	211.167
	1118	1118	209.37	211.333	1118	88.0606	211.333
	1119	1119	209.545	211.5	1119	88.0099	211.5
	1120	1120	209.721	211.667	1120	87.959	211.667
	1121	1121	209.897	211.833	1121	87.9078	211.833
	1122	1122	210.07	212	1122	87.8561	212
	1123	1123	210.236	212.167	1123	87.8039	212.167
	1124	1124	210.414	212.333	1124	87.7514	212.333
	1125	1125	210.583	212.5	1125	87.699	212.5
	1126	1126	210.754	212.667	1126	87.6456	212.667
	1127	1127	210.917	212.833	1127	87.5925	212.833
	1128	1128	211.088	213	1128	87.5395	213
	1129	1129	211.267	213.167	1129	87.4865	213.167
	1130	1130	211.442	213.333	1130	87.4337	213.333
	1131	1131	211.619	213.5	1131	87.3806	213.5
	1132	1132	211.784	213.667	1132	87.3271	213.667
	1133	1133	211.948	213.833	1133	87.2732	213.833
	1134	1134	212.118	214	1134	87.2186	214
	1135	1135	212.288	214.167	1135	87.1642	214.167
	1136	1136	212.466	214.333	1136	87.1099	214.333
	1137	1137	212.638	214.5	1137	87.0555	214.5
	1138	1138	212.813	214.667	1138	87.0006	214.667
	1139	1139	212.984	214.833	1139	86.9459	214.833
	1140	1140	213.155	215	1140	86.8909	215
	1141	1141	213.33	215.167	1141	86.8357	215.167
	1142	1142	213.495	215.333	1142	86.7803	215.333
	1143	1143	213.673	215.5	1143	86.7249	215.5
	1144	1144	213.849	215.667	1144	86.6694	215.667
	1145	1145	214.026	215.833	1145	86.6139	215.833
	1146	1146	214.18	216	1146	86.5573	216
	1147	1147	214.363	216.167	1147	86.5006	216.167
	1148	1148	214.521	216.333	1148	86.4438	216.333
	1149	1149	214.699	216.5	1149	86.3869	216.5
	1150	1150	214.865	216.667	1150	86.3291	216.667
	1151	1151	215.032	216.833	1151	86.2719	216.833
	1152	1152	215.208	217	1152	86.2146	217
	1153	1153	215.377	217.167	1153	86.1572	217.167
	1154	1154	215.558	217.333	1154	86.0992	217.333
	1155	1155	215.723	217.5	1155	86.0413	217.5
	1156	1156	215.899	217.667	1156	85.9832	217.667
	1157	1157	216.063	217.833	1157	85.9249	217.833
	1158	1158	216.233	218	1158	85.8653	218
	1159	1159	216.408	218.167	1159	85.8061	218.167
	1160	1160	216.582	218.333	1160	85.7469	218.333
	1161	1161	216.749	218.5	1161	85.6875	218.5
	1162	1162	216.921	218.667	1162	85.6279	218.667
	1163	1163	217.096	218.833	1163	85.5685	218.833
	1164	1164	217.266	219	1164	85.5091	219
	1165	1165	217.435	219.167	1165	85.4494	219.167
	1166	1166	217.604	219.333	1166	85.3892	219.333
	1167	1167	217.783	219.5	1167	85.3288	219.5
	1168	1168	217.96	219.667	1168	85.2683	219.667
	1169	1169	218.119	219.833	1169	85.2078	219.833
	1170	1170	218.297	220	1170	85.1464	220
	1171	1171	218.47	220.167	1171	85.0855	220.167
	1172	1172	218.643	220.333	1172	85.0246	220.333
	1173	1173	218.807	220.5	1173	84.9635	220.5
	1174	1174	218.975	220.667	1174	84.902	220.667
	1175	1175	219.152	220.833	1175	84.8403	220.833
	1176	1176	219.322	221	1176	84.7785	221
	1177	1177	219.488	221.167	1177	84.7165	221.167
	1178	1178	219.658	221.333	1178	84.6537	221.333
	1179	1179	219.832	221.5	1179	84.591	221.5
	1180	1180	220.012	221.667	1180	84.528	221.667
	1181	1181	220.174	221.833	1181	84.4649	221.833
	1182	1182	220.346	222	1182	84.4012	222
	1183	1183	220.517	222.167	1183	84.3377	222.167
	1184	1184	220.693	222.333	1184	84.2742	222.333
	1185	1185	220.863	222.5	1185	84.2108	222.5
	1186	1186	221.028	222.667	1186	84.1472	222.667
	1187	1187	221.201	222.833	1187	84.0828	222.833
	1188	1188	221.376	223	1188	84.018	223
	1189	1189	221.548	223.167	1189	83.9532	223.167
	1190	1190	221.722	223.333	1190	83.8883	223.333
	1191	1191	221.891	223.5	1191	83.8223	223.5
	1192	1192	222.064	223.667	1192	83.7566	223.667
	1193	1193	222.231	223.833	1193	83.6907	223.833
	1194	1194	222.41	224	1194	83.6248	224
	1195	1195	222.58	224.167	1195	83.5589	224.167
	1196	1196	222.747	224.333	1196	83.4928	224.333
	1197	1197	222.916	224.5	1197	83.4266	224.5
	1198	1198	223.087	224.667	1198	83.3603	224.667
	1199	1199	223.258	224.833	1199	83.2932	224.833
	1200	1200	223.428	225	1200	83.226	225
	1201	1201	223.604	225.167	1201	83.1588	225.167
	1202	1202	223.773	225.333	1202	83.0917	225.333
	1203	1203	223.943	225.5	1203	83.0238	225.5
	1204	1204	224.107	225.667	1204	82.9563	225.667
	1205	1205	224.284	225.833	1205	82.8887	225.833
	1206	1206	224.458	226	1206	82.821	226
	1207	1207	224.627	226.167	1207	82.7527	226.167
	1208	1208	224.803	226.333	1208	82.684	226.333
	1209	1209	224.97	226.5	1209	82.615	226.5
	1210	1210	225.148	226.667	1210	82.546	226.667
	1211	1211	225.309	226.833	1211	82.4758	226.833
	1212	1212	225.484	227	1212	82.4063	227
	1213	1213	225.652	227.167	1213	82.3369	227.167
	1214	1214	225.82	227.333	1214	82.2673	227.333
	1215	1215	225.996	227.5	1215	82.1971	227.5
	1216	1216	226.164	227.667	1216	82.1266	227.667
	1217	1217	226.337	227.833	1217	82.0561	227.833
	1218	1218	226.501	228	1218	81.9855	228
	1219	1219	226.673	228.167	1219	81.9139	228.167
	1220	1220	226.846	228.333	1220	81.8428	228.333
	1221	1221	227.015	228.5	1221	81.7715	228.5
	1222	1222	227.186	228.667	1222	81.6999	228.667
	1223	1223	227.357	228.833	1223	81.628	228.833
	1224	1224	227.532	229	1224	81.5561	229
	1225	1225	227.699	229.167	1225	81.4842	229.167
	1226	1226	227.87	229.333	1226	81.4122	229.333
	1227	1227	228.042	229.5	1227	81.3395	229.5
	1228	1228	228.207	229.667	1228	81.2669	229.667
	1229	1229	228.378	229.833	1229	81.1939	229.833
	1230	1230	228.554	230	1230	81.1205	230
	1231	1231	228.718	230.167	1231	81.0465	230.167
	1232	1232	228.895	230.333	1232	80.9726	230.333
	1233	1233	229.066	230.5	1233	80.8988	230.5
	1234	1234	229.238	230.667	1234	80.8248	230.667
	1235	1235	229.403	230.833	1235	80.7503	230.833
	1236	1236	229.571	231	1236	80.6765	231
	1237	1237	229.745	231.167	1237	80.603	231.167
	1238	1238	229.924	231.333	1238	80.5297	231.333
	1239	1239	230.088	231.5	1239	80.4568	231.5
	1240	1240	230.258	231.667	1240	80.3833	231.667
	1241	1241	230.429	231.833	1241	80.3092	231.833
	1242	1242	230.605	232	1242	80.2346	232
	1243	1243	230.775	232.167	1243	80.1588	232.167
	1244	1244	230.946	232.333	1244	80.0829	232.333
	1245	1245	231.125	232.5	1245	80.0064	232.5
	1246	1246	231.289	232.667	1246	79.9295	232.667
	1247	1247	231.46	232.833	1247	79.8507	232.833
	1248	1248	231.624	233	1248	79.7728	233
	1249	1249	231.804	233.167	1249	79.6947	233.167
	1250	1250	231.968	233.333	1250	79.6163	233.333
	1251	1251	232.141	233.5	1251	79.5371	233.5
	1252	1252	232.315	233.667	1252	79.4582	233.667
	1253	1253	232.492	233.833	1253	79.3792	233.833
	1254	1254	232.653	234	1254	79.2999	234
	1255	1255	232.823	234.167	1255	79.22	234.167
	1256	1256	232.995	234.333	1256	79.1394	234.333
	1257	1257	233.17	234.5	1257	79.0591	234.5
	1258	1258	233.339	234.667	1258	78.9788	234.667
	1259	1259	233.508	234.833	1259	78.8984	234.833
	1260	1260	233.675	235	1260	78.8172	235
	1261	1261	233.839	235.167	1261	78.7361	235.167
	1262	1262	234.023	235.333	1262	78.6548	235.333
	1263	1263	234.188	235.5	1263	78.5739	235.5
	1264	1264	234.365	235.667	1264	78.4923	235.667
	1265	1265	234.537	235.833	1265	78.4109	235.833
	1266	1266	234.71	236	1266	78.3293	236
	1267	1267	234.874	236.167	1267	78.2473	236.167
	1268	1268	235.047	236.333	1268	78.1645	236.333
	1269	1269	235.214	236.5	1269	78.0817	236.5
	1270	1270	235.387	236.667	1270	77.999	236.667
	1271	1271	235.555	236.833	1271	77.9162	236.833
	1272	1272	235.723	237	1272	77.8328	237
	1273	1273	235.897	237.167	1273	77.7498	237.167
	1274	1274	236.073	237.333	1274	77.6667	237.333
	1275	1275	236.244	237.5	1275	77.5837	237.5
	1276	1276	236.407	237.667	1276	77.5	237.667
	1277	1277	236.58	237.833	1277	77.4157	237.833
	1278	1278	236.755	238	1278	77.331	238
	1279	1279	236.924	238.167	1279	77.2462	238.167
	1280	1280	237.093	238.333	1280	77.1598	238.333
	1281	1281	237.258	238.5	1281	77.074	238.5
	1282	1282	237.437	238.667	1282	76.988	238.667
	1283	1283	237.611	238.833	1283	76.9017	238.833
	1284	1284	237.776	239	1284	76.8151	239
	1285	1285	237.948	239.167	1285	76.7285	239.167
	1286	1286	238.119	239.333	1286	76.6417	239.333
	1287	1287	238.284	239.5	1287	76.5545	239.5
	1288	1288	238.454	239.667	1288	76.4664	239.667
	1289	1289	238.631	239.833	1289	76.3785	239.833
	1290	1290	238.806	240	1290	76.2905	240
	1291	1291	238.967	240.167	1291	76.2026	240.167
	1292	1292	239.142	240.333	1292	76.1143	240.333
	1293	1293	239.311	240.5	1293	76.0263	240.5
	1294	1294	239.479	240.667	1294	75.9378	240.667
	1295	1295	239.657	240.833	1295	75.8489	240.833
	1296	1296	239.823	241	1296	75.7596	241
	1297	1297	239.999	241.167	1297	75.67	241.167
	1298	1298	240.163	241.333	1298	75.5802	241.333
	1299	1299	240.338	241.5	1299	75.4903	241.5
	1300	1300	240.513	241.667	1300	75.3991	241.667
	1301	1301	240.672	241.833	1301	75.309	241.833
	1302	1302	240.837	242	1302	75.2195	242
	1303	1303	241.017	242.167	1303	75.1305	242.167
	1304	1304	241.187	242.333	1304	75.0416	242.333
	1305	1305	241.366	242.5	1305	74.9515	242.5
	1306	1306	241.53	242.667	1306	74.8605	242.667
	1307	1307	241.706	242.833	1307	74.769	242.833
	1308	1308	241.879	243	1308	74.676	243
	1309	1309	242.051	243.167	1309	74.5829	243.167
	1310	1310	242.21	243.333	1310	74.4893	243.333
	1311	1311	242.388	243.5	1311	74.3956	243.5
	1312	1312	242.562	243.667	1312	74.3003	243.667
	1313	1313	242.725	243.833	1313	74.2059	243.833
	1314	1314	242.901	244	1314	74.1116	244
	1315	1315	243.071	244.167	1315	74.0174	244.167
	1316	1316	243.246	244.333	1316	73.9231	244.333
	1317	1317	243.409	244.5	1317	73.8286	244.5
	1318	1318	243.584	244.667	1318	73.7335	244.667
	1319	1319	243.755	244.833	1319	73.6381	244.833
	1320	1320	243.922	245	1320	73.5422	245
	1321	1321	244.084	245.167	1321	73.4464	245.167
	1322	1322	244.254	245.333	1322	73.3504	245.333
	1323	1323	244.431	245.5	1323	73.2545	245.5
	1324	1324	244.604	245.667	1324	73.1579	245.667
	1325	1325	244.782	245.833	1325	73.0616	245.833
	1326	1326	244.951	246	1326	72.965	246
	1327	1327	245.118	246.167	1327	72.868	246.167
	1328	1328	245.281	246.333	1328	72.7704	246.333
	1329	1329	245.458	246.5	1329	72.6728	246.5
	1330	1330	245.628	246.667	1330	72.575	246.667
	1331	1331	245.79	246.833	1331	72.4771	246.833
	1332	1332	245.961	247	1332	72.3777	247
	1333	1333	246.135	247.167	1333	72.2786	247.167
	1334	1334	246.308	247.333	1334	72.1792	247.333
	1335	1335	246.473	247.5	1335	72.0799	247.5
	1336	1336	246.639	247.667	1336	71.9797	247.667
	1337	1337	246.818	247.833	1337	71.8798	247.833
	1338	1338	246.988	248	1338	71.7798	248
	1339	1339	247.157	248.167	1339	71.6798	248.167
	1340	1340	247.331	248.333	1340	71.5795	248.333
	1341	1341	247.499	248.5	1341	71.479	248.5
	1342	1342	247.667	248.667	1342	71.3779	248.667
	1343	1343	247.831	248.833	1343	71.2763	248.833
	1344	1344	248.008	249	1344	71.1739	249
	1345	1345	248.176	249.167	1345	71.0712	249.167
	1346	1346	248.346	249.333	1346	70.9682	249.333
	1347	1347	248.516	249.5	1347	70.8649	249.5
	1348	1348	248.687	249.667	1348	70.7613	249.667
	1349	1349	248.859	249.833	1349	70.657	249.833
	1350	1350	249.029	250	1350	70.5532	250
	1351	1351	249.202	250.167	1351	70.4495	250.167
	1352	1352	249.375	250.333	1352	70.3457	250.333
	1353	1353	249.54	250.5	1353	70.2418	250.5
	1354	1354	249.708	250.667	1354	70.1374	250.667
	1355	1355	249.88	250.833	1355	70.0326	250.833
	1356	1356	250.059	251	1356	69.9276	251
	1357	1357	250.233	251.167	1357	69.8217	251.167
	1358	1358	250.403	251.333	1358	69.7162	251.333
	1359	1359	250.569	251.5	1359	69.6106	251.5
	1360	1360	250.734	251.667	1360	69.5049	251.667
	1361	1361	250.905	251.833	1361	69.398	251.833
	1362	1362	251.074	252	1362	69.291	252
	1363	1363	251.248	252.167	1363	69.1839	252.167
	1364	1364	251.419	252.333	1364	69.0766	252.333
	1365	1365	251.59	252.5	1365	68.9681	252.5
	1366	1366	251.762	252.667	1366	68.8603	252.667
	1367	1367	251.929	252.833	1367	68.7523	252.833
	1368	1368	252.098	253	1368	68.644	253
	1369	1369	252.269	253.167	1369	68.5351	253.167
	1370	1370	252.441	253.333	1370	68.426	253.333
	1371	1371	252.612	253.5	1371	68.3168	253.5
	1372	1372	252.786	253.667	1372	68.2075	253.667
	1373	1373	252.95	253.833	1373	68.0972	253.833
	1374	1374	253.126	254	1374	67.9874	254
	1375	1375	253.288	254.167	1375	67.8776	254.167
	1376	1376	253.456	254.333	1376	67.7677	254.333
	1377	1377	253.632	254.5	1377	67.6572	254.5
	1378	1378	253.804	254.667	1378	67.5464	254.667
	1379	1379	253.967	254.833	1379	67.4354	254.833
	1380	1380	254.142	255	1380	67.3241	255
	1381	1381	254.315	255.167	1381	67.2117	255.167
	1382	1382	254.483	255.333	1382	67.0997	255.333
	1383	1383	254.654	255.5	1383	66.9878	255.5
	1384	1384	254.826	255.667	1384	66.8757	255.667
	1385	1385	254.99	255.833	1385	66.7626	255.833
	1386	1386	255.159	256	1386	66.6492	256
	1387	1387	255.332	256.167	1387	66.5356	256.167
	1388	1388	255.508	256.333	1388	66.4218	256.333
	1389	1389	255.672	256.5	1389	66.3064	256.5
	1390	1390	255.846	256.667	1390	66.1917	256.667
	1391	1391	256.01	256.833	1391	66.0771	256.833
	1392	1392	256.181	257	1392	65.9626	257
	1393	1393	256.348	257.167	1393	65.8471	257.167
	1394	1394	256.53	257.333	1394	65.7313	257.333
	1395	1395	256.696	257.5	1395	65.6154	257.5
	1396	1396	256.875	257.667	1396	65.4992	257.667
	1397	1397	257.044	257.833	1397	65.382	257.833
	1398	1398	257.207	258	1398	65.2655	258
	1399	1399	257.37	258.167	1399	65.1489	258.167
	1400	1400	257.543	258.333	1400	65.0321	258.333
	1401	1401	257.716	258.5	1401	64.9146	258.5
	1402	1402	257.887	258.667	1402	64.7968	258.667
	1403	1403	258.059	258.833	1403	64.6789	258.833
	1404	1404	258.239	259	1404	64.561	259
	1405	1405	258.404	259.167	1405	64.4418	259.167
	1406	1406	258.575	259.333	1406	64.3231	259.333
	1407	1407	258.746	259.5	1407	64.2045	259.5
	1408	1408	258.919	259.667	1408	64.0857	259.667
	1409	1409	259.089	259.833	1409	63.9665	259.833
	1410	1410	259.259	260	1410	63.8468	260
	1411	1411	259.426	260.167	1411	63.7266	260.167
	1412	1412	259.597	260.333	1412	63.6061	260.333
	1413	1413	259.766	260.5	1413	63.4845	260.5
	1414	1414	259.932	260.667	1414	63.3633	260.667
	1415	1415	260.096	260.833	1415	63.2422	260.833
	1416	1416	260.269	261	1416	63.1209	261
	1417	1417	260.446	261.167	1417	62.9993	261.167
	1418	1418	260.614	261.333	1418	62.8765	261.333
	1419	1419	260.784	261.5	1419	62.7539	261.5
	1420	1420	260.952	261.667	1420	62.6311	261.667
	1421	1421	261.128	261.833	1421	62.5079	261.833
	1422	1422	261.298	262	1422	62.3841	262
	1423	1423	261.466	262.167	1423	62.2607	262.167
	1424	1424	261.633	262.333	1424	62.1372	262.333
	1425	1425	261.807	262.5	1425	62.0143	262.5
	1426	1426	261.98	262.667	1426	61.8899	262.667
	1427	1427	262.143	262.833	1427	61.7654	262.833
	1428	1428	262.313	263	1428	61.6408	263
	1429	1429	262.487	263.167	1429	61.5159	263.167
	1430	1430	262.655	263.333	1430	61.3904	263.333
	1431	1431	262.824	263.5	1431	61.2647	263.5
	1432	1432	263.003	263.667	1432	61.1387	263.667
	1433	1433	263.167	263.833	1433	61.0119	263.833
	1434	1434	263.332	264	1434	60.8843	264
	1435	1435	263.508	264.167	1435	60.757	264.167
	1436	1436	263.68	264.333	1436	60.6298	264.333
	1437	1437	263.851	264.5	1437	60.5026	264.5
	1438	1438	264.015	264.667	1438	60.3748	264.667
	1439	1439	264.187	264.833	1439	60.2471	264.833
	1440	1440	264.365	265	1440	60.119	265
	1441	1441	264.536	265.167	1441	59.9905	265.167
	1442	1442	264.708	265.333	1442	59.8615	265.333
	1443	1443	264.873	265.5	1443	59.7324	265.5
	1444	1444	265.047	265.667	1444	59.6031	265.667
	1445	1445	265.22	265.833	1445	59.4739	265.833
	1446	1446	265.386	266	1446	59.3436	266
	1447	1447	265.552	266.167	1447	59.2135	266.167
	1448	1448	265.721	266.333	1448	59.083	266.333
	1449	1449	265.896	266.5	1449	58.9523	266.5
	1450	1450	266.066	266.667	1450	58.8211	266.667
	1451	1451	266.231	266.833	1451	58.6899	266.833
	1452	1452	266.404	267	1452	58.5587	267
	1453	1453	266.571	267.167	1453	58.4274	267.167
	1454	1454	266.739	267.333	1454	58.2957	267.333
	1455	1455	266.914	267.5	1455	58.1639	267.5
	1456	1456	267.084	267.667	1456	58.0316	267.667
	1457	1457	267.254	267.833	1457	57.899	267.833
	1458	1458	267.419	268	1458	57.7658	268
	1459	1459	267.589	268.167	1459	57.6326	268.167
	1460	1460	267.762	268.333	1460	57.4992	268.333
	1461	1461	267.932	268.5	1461	57.3657	268.5
	1462	1462	268.103	268.667	1462	57.2314	268.667
	1463	1463

## Sheet: B3
Title	20.08.2018	12:26:00
________________________________________________________________________________
Title
Evaluation	Categories:
Curve	Name:
	!3%-25..600C	10K	N2	50ML	AL100	BLANK	20.08.2018	12:25:16
Curve	Values:
	Index	t	Ts	Tr	x	value	y	value
	[s]	[°C]	[°C]	[s]	[%]
	0	0	24.46	25	0	100.003
	1	1	24.4517	25.1667	1	100.006
	2	2	24.4931	25.3333	2	100.009
	3	3	24.5608	25.5	3	100.012
	4	4	24.6139	25.6667	4	100.01
	5	5	24.7242	25.8333	5	99.9995
	6	6	24.8231	26	6	99.9867
	7	7	24.9099	26.1667	7	99.9738
	8	8	25.0047	26.3333	8	99.9672
	9	9	25.1304	26.5	9	99.962
	10	10	25.2717	26.6667	10	99.9576
	11	11	25.3922	26.8333	11	99.9544
	12	12	25.509	27	12	99.9523
	13	13	25.6535	27.1667	13	99.9479
	14	14	25.7887	27.3333	14	99.9437
	15	15	25.9211	27.5	15	99.9492
	16	16	26.0746	27.6667	16	99.9491
	17	17	26.2044	27.8333	17	99.9493
	18	18	26.3353	28	18	99.95
	19	19	26.4772	28.1667	19	99.951
	20	20	26.611	28.3333	20	99.952
	21	21	26.7638	28.5	21	99.9532
	22	22	26.9106	28.6667	22	99.9541
	23	23	27.0809	28.8333	23	99.9546
	24	24	27.1796	29	24	99.955
	25	25	27.3306	29.1667	25	99.9556
	26	26	27.4939	29.3333	26	99.9563
	27	27	27.6203	29.5	27	99.9569
	28	28	27.783	29.6667	28	99.9572
	29	29	27.9191	29.8333	29	99.9577
	30	30	28.0484	30	30	99.9582
	31	31	28.2142	30.1667	31	99.9588
	32	32	28.3462	30.3333	32	99.9594
	33	33	28.5207	30.5	33	99.9601
	34	34	28.6578	30.6667	34	99.9609
	35	35	28.7933	30.8333	35	99.9615
	36	36	28.9402	31	36	99.9621
	37	37	29.0783	31.1667	37	99.9626
	38	38	29.2043	31.3333	38	99.963
	39	39	29.3544	31.5	39	99.9634
	40	40	29.5053	31.6667	40	99.9638
	41	41	29.6414	31.8333	41	99.9645
	42	42	29.7787	32	42	99.9651
	43	43	29.9049	32.1667	43	99.9657
	44	44	30.0393	32.3333	44	99.9669
	45	45	30.1638	32.5	45	99.9677
	46	46	30.2967	32.6667	46	99.9683
	47	47	30.4662	32.8333	47	99.9689
	48	48	30.5981	33	48	99.9691
	49	49	30.7353	33.1667	49	99.9694
	50	50	30.8797	33.3333	50	99.9695
	51	51	31.0155	33.5	51	99.9695
	52	52	31.1542	33.6667	52	99.969
	53	53	31.2955	33.8333	53	99.9687
	54	54	31.4513	34	54	99.9683
	55	55	31.5513	34.1667	55	99.9679
	56	56	31.7054	34.3333	56	99.9675
	57	57	31.8212	34.5	57	99.9671
	58	58	31.96	34.6667	58	99.9668
	59	59	32.133	34.8333	59	99.9664
	60	60	32.2637	35	60	99.9657
	61	61	32.3993	35.1667	61	99.9649
	62	62	32.5137	35.3333	62	99.9642
	63	63	32.6511	35.5	63	99.9635
	64	64	32.8088	35.6667	64	99.9626
	65	65	32.9681	35.8333	65	99.9619
	66	66	33.0416	36	66	99.9613
	67	67	33.2127	36.1667	67	99.9606
	68	68	33.3536	36.3333	68	99.9601
	69	69	33.5066	36.5	69	99.9595
	70	70	33.6115	36.6667	70	99.9589
	71	71	33.7603	36.8333	71	99.9583
	72	72	33.9053	37	72	99.9578
	73	73	34.04	37.1667	73	99.9573
	74	74	34.1724	37.3333	74	99.9567
	75	75	34.2915	37.5	75	99.9561
	76	76	34.4402	37.6667	76	99.9557
	77	77	34.5858	37.8333	77	99.9552
	78	78	34.7318	38	78	99.9546
	79	79	34.8535	38.1667	79	99.954
	80	80	34.9966	38.3333	80	99.9532
	81	81	35.135	38.5	81	99.9526
	82	82	35.2779	38.6667	82	99.9519
	83	83	35.4108	38.8333	83	99.9512
	84	84	35.5572	39	84	99.9505
	85	85	35.6923	39.1667	85	99.9499
	86	86	35.862	39.3333	86	99.9492
	87	87	36.0079	39.5	87	99.9485
	88	88	36.125	39.6667	88	99.948
	89	89	36.235	39.8333	89	99.9474
	90	90	36.4014	40	90	99.9469
	91	91	36.5512	40.1667	91	99.9466
	92	92	36.6771	40.3333	92	99.9464
	93	93	36.8533	40.5	93	99.9461
	94	94	36.9265	40.6667	94	99.9459
	95	95	37.0861	40.8333	95	99.9458
	96	96	37.2182	41	96	99.9458
	97	97	37.3651	41.1667	97	99.946
	98	98	37.4838	41.3333	98	99.9461
	99	99	37.6271	41.5	99	99.9462
	100	100	37.7813	41.6667	100	99.9464
	101	101	37.9402	41.8333	101	99.9467
	102	102	38.0598	42	102	99.947
	103	103	38.2095	42.1667	103	99.9473
	104	104	38.3414	42.3333	104	99.9475
	105	105	38.5271	42.5	105	99.9478
	106	106	38.6763	42.6667	106	99.948
	107	107	38.7899	42.8333	107	99.9482
	108	108	38.9176	43	108	99.9483
	109	109	39.0721	43.1667	109	99.9482
	110	110	39.2001	43.3333	110	99.9482
	111	111	39.3651	43.5	111	99.9484
	112	112	39.4949	43.6667	112	99.9486
	113	113	39.6364	43.8333	113	99.9487
	114	114	39.7599	44	114	99.9488
	115	115	39.9408	44.1667	115	99.9489
	116	116	40.0352	44.3333	116	99.9491
	117	117	40.1588	44.5	117	99.9492
	118	118	40.348	44.6667	118	99.9493
	119	119	40.4948	44.8333	119	99.9494
	120	120	40.6545	45	120	99.9496
	121	121	40.8004	45.1667	121	99.95
	122	122	40.9217	45.3333	122	99.9502
	123	123	41.0677	45.5	123	99.9503
	124	124	41.2047	45.6667	124	99.9506
	125	125	41.3518	45.8333	125	99.951
	126	126	41.512	46	126	99.9514
	127	127	41.6314	46.1667	127	99.9519
	128	128	41.7741	46.3333	128	99.9523
	129	129	41.9328	46.5	129	99.9529
	130	130	42.0534	46.6667	130	99.9536
	131	131	42.2332	46.8333	131	99.9541
	132	132	42.382	47	132	99.9546
	133	133	42.5158	47.1667	133	99.955
	134	134	42.649	47.3333	134	99.9555
	135	135	42.8216	47.5	135	99.9559
	136	136	42.954	47.6667	136	99.9563
	137	137	43.1297	47.8333	137	99.9565
	138	138	43.2662	48	138	99.9568
	139	139	43.3906	48.1667	139	99.9573
	140	140	43.5208	48.3333	140	99.9577
	141	141	43.6702	48.5	141	99.9582
	142	142	43.8344	48.6667	142	99.9586
	143	143	43.9895	48.8333	143	99.9591
	144	144	44.1143	49	144	99.9597
	145	145	44.2522	49.1667	145	99.9606
	146	146	44.4237	49.3333	146	99.9613
	147	147	44.5638	49.5	147	99.9621
	148	148	44.717	49.6667	148	99.9629
	149	149	44.8685	49.8333	149	99.9638
	150	150	45.0282	50	150	99.9646
	151	151	45.182	50.1667	151	99.9652
	152	152	45.3095	50.3333	152	99.9658
	153	153	45.4672	50.5	153	99.9661
	154	154	45.6035	50.6667	154	99.9666
	155	155	45.7531	50.8333	155	99.967
	156	156	45.8964	51	156	99.9674
	157	157	46.0547	51.1667	157	99.9678
	158	158	46.2003	51.3333	158	99.9681
	159	159	46.3325	51.5	159	99.9686
	160	160	46.4817	51.6667	160	99.9691
	161	161	46.6254	51.8333	161	99.9693
	162	162	46.7777	52	162	99.9697
	163	163	46.9465	52.1667	163	99.97
	164	164	47.0931	52.3333	164	99.9702
	165	165	47.264	52.5	165	99.9703
	166	166	47.3976	52.6667	166	99.9707
	167	167	47.5378	52.8333	167	99.9711
	168	168	47.6938	53	168	99.9715
	169	169	47.8435	53.1667	169	99.972
	170	170	48.0201	53.3333	170	99.9724
	171	171	48.1595	53.5	171	99.9728
	172	172	48.2991	53.6667	172	99.9732
	173	173	48.4554	53.8333	173	99.9735
	174	174	48.6107	54	174	99.9737
	175	175	48.7569	54.1667	175	99.9741
	176	176	48.9103	54.3333	176	99.9746
	177	177	49.0586	54.5	177	99.9751
	178	178	49.2099	54.6667	178	99.9758
	179	179	49.3715	54.8333	179	99.9764
	180	180	49.5157	55	180	99.977
	181	181	49.667	55.1667	181	99.9775
	182	182	49.8243	55.3333	182	99.9784
	183	183	49.9784	55.5	183	99.979
	184	184	50.1165	55.6667	184	99.9794
	185	185	50.2888	55.8333	185	99.9801
	186	186	50.4334	56	186	99.9805
	187	187	50.5857	56.1667	187	99.9809
	188	188	50.7432	56.3333	188	99.9813
	189	189	50.9176	56.5	189	99.9819
	190	190	51.0387	56.6667	190	99.982
	191	191	51.188	56.8333	191	99.9823
	192	192	51.3444	57	192	99.9826
	193	193	51.4875	57.1667	193	99.9829
	194	194	51.645	57.3333	194	99.9832
	195	195	51.7984	57.5	195	99.9835
	196	196	51.9312	57.6667	196	99.9838
	197	197	52.1094	57.8333	197	99.9841
	198	198	52.2767	58	198	99.9845
	199	199	52.4138	58.1667	199	99.9851
	200	200	52.5759	58.3333	200	99.9856
	201	201	52.7296	58.5	201	99.986
	202	202	52.8893	58.6667	202	99.9866
	203	203	53.0429	58.8333	203	99.9872
	204	204	53.1819	59	204	99.9876
	205	205	53.3465	59.1667	205	99.988
	206	206	53.5	59.3333	206	99.9887
	207	207	53.6592	59.5	207	99.9892
	208	208	53.7997	59.6667	208	99.9897
	209	209	53.9565	59.8333	209	99.9902
	210	210	54.1189	60	210	99.991
	211	211	54.2784	60.1667	211	99.9915
	212	212	54.4266	60.3333	212	99.9919
	213	213	54.5961	60.5	213	99.9923
	214	214	54.7564	60.6667	214	99.9926
	215	215	54.8976	60.8333	215	99.9929
	216	216	55.0466	61	216	99.9932
	217	217	55.206	61.1667	217	99.9937
	218	218	55.3592	61.3333	218	99.9941
	219	219	55.5279	61.5	219	99.9945
	220	220	55.6948	61.6667	220	99.995
	221	221	55.836	61.8333	221	99.9958
	222	222	55.9917	62	222	99.9964
	223	223	56.1401	62.1667	223	99.9969
	224	224	56.3023	62.3333	224	99.9976
	225	225	56.4529	62.5	225	99.9982
	226	226	56.6162	62.6667	226	99.9982
	227	227	56.7839	62.8333	227	99.9986
	228	228	56.9334	63	228	99.9991
	229	229	57.093	63.1667	229	99.9993
	230	230	57.252	63.3333	230	99.9994
	231	231	57.4125	63.5	231	99.9999
	232	232	57.5677	63.6667	232	100
	233	233	57.7295	63.8333	233	100.001
	234	234	57.8861	64	234	100.001
	235	235	58.0411	64.1667	235	100.002
	236	236	58.1932	64.3333	236	100.002
	237	237	58.3539	64.5	237	100.002
	238	238	58.5084	64.6667	238	100.002
	239	239	58.6687	64.8333	239	100.002
	240	240	58.8243	65	240	100.003
	241	241	58.988	65.1667	241	100.003
	242	242	59.1447	65.3333	242	100.003
	243	243	59.2831	65.5	243	100.003
	244	244	59.4598	65.6667	244	100.004
	245	245	59.6446	65.8333	245	100.004
	246	246	59.7849	66	246	100.004
	247	247	59.9782	66.1667	247	100.004
	248	248	60.1159	66.3333	248	100.004
	249	249	60.2521	66.5	249	100.004
	250	250	60.4303	66.6667	250	100.005
	251	251	60.5752	66.8333	251	100.006
	252	252	60.7349	67	252	100.007
	253	253	60.9002	67.1667	253	100.007
	254	254	61.0588	67.3333	254	100.008
	255	255	61.2202	67.5	255	100.009
	256	256	61.384	67.6667	256	100.01
	257	257	61.5256	67.8333	257	100.011
	258	258	61.6958	68	258	100.012
	259	259	61.8689	68.1667	259	100.013
	260	260	62.0179	68.3333	260	100.014
	261	261	62.1758	68.5	261	100.015
	262	262	62.3558	68.6667	262	100.016
	263	263	62.5093	68.8333	263	100.017
	264	264	62.657	69	264	100.019
	265	265	62.8363	69.1667	265	100.02
	266	266	63.0137	69.3333	266	100.021
	267	267	63.1663	69.5	267	100.023
	268	268	63.3318	69.6667	268	100.025
	269	269	63.5041	69.8333	269	100.026
	270	270	63.6683	70	270	100.027
	271	271	63.8373	70.1667	271	100.028
	272	272	64.0042	70.3333	272	100.029
	273	273	64.1622	70.5	273	100.031
	274	274	64.3321	70.6667	274	100.031
	275	275	64.4898	70.8333	275	100.033
	276	276	64.6655	71	276	100.034
	277	277	64.8294	71.1667	277	100.035
	278	278	64.983	71.3333	278	100.035
	279	279	65.1509	71.5	279	100.036
	280	280	65.33	71.6667	280	100.037
	281	281	65.5009	71.8333	281	100.038
	282	282	65.6507	72	282	100.038
	283	283	65.8243	72.1667	283	100.039
	284	284	65.995	72.3333	284	100.039
	285	285	66.1652	72.5	285	100.04
	286	286	66.3432	72.6667	286	100.041
	287	287	66.509	72.8333	287	100.042
	288	288	66.6718	73	288	100.042
	289	289	66.8458	73.1667	289	100.043
	290	290	67.0097	73.3333	290	100.044
	291	291	67.1738	73.5	291	100.044
	292	292	67.3521	73.6667	292	100.045
	293	293	67.5302	73.8333	293	100.045
	294	294	67.6945	74	294	100.046
	295	295	67.8666	74.1667	295	100.046
	296	296	68.04	74.3333	296	100.046
	297	297	68.2005	74.5	297	100.046
	298	298	68.3777	74.6667	298	100.047
	299	299	68.5351	74.8333	299	100.047
	300	300	68.7104	75	300	100.047
	301	301	68.8743	75.1667	301	100.048
	302	302	69.063	75.3333	302	100.048
	303	303	69.2284	75.5	303	100.048
	304	304	69.4093	75.6667	304	100.048
	305	305	69.582	75.8333	305	100.048
	306	306	69.754	76	306	100.049
	307	307	69.9284	76.1667	307	100.049
	308	308	70.0871	76.3333	308	100.049
	309	309	70.2604	76.5	309	100.049
	310	310	70.4357	76.6667	310	100.049
	311	311	70.6045	76.8333	311	100.048
	312	312	70.7763	77	312	100.048
	313	313	70.949	77.1667	313	100.048
	314	314	71.1217	77.3333	314	100.048
	315	315	71.2885	77.5	315	100.048
	316	316	71.4501	77.6667	316	100.049
	317	317	71.6395	77.8333	317	100.049
	318	318	71.8132	78	318	100.049
	319	319	71.9769	78.1667	319	100.05
	320	320	72.1566	78.3333	320	100.05
	321	321	72.3284	78.5	321	100.05
	322	322	72.4946	78.6667	322	100.05
	323	323	72.6628	78.8333	323	100.049
	324	324	72.8413	79	324	100.048
	325	325	73.0255	79.1667	325	100.047
	326	326	73.1741	79.3333	326	100.047
	327	327	73.346	79.5	327	100.046
	328	328	73.5075	79.6667	328	100.047
	329	329	73.6761	79.8333	329	100.046
	330	330	73.8574	80	330	100.046
	331	331	74.0183	80.1667	331	100.046
	332	332	74.2065	80.3333	332	100.046
	333	333	74.3827	80.5	333	100.046
	334	334	74.5485	80.6667	334	100.046
	335	335	74.7262	80.8333	335	100.045
	336	336	74.9028	81	336	100.045
	337	337	75.0787	81.1667	337	100.044
	338	338	75.2391	81.3333	338	100.044
	339	339	75.4139	81.5	339	100.043
	340	340	75.5762	81.6667	340	100.043
	341	341	75.7544	81.8333	341	100.043
	342	342	75.9198	82	342	100.042
	343	343	76.0981	82.1667	343	100.041
	344	344	76.2744	82.3333	344	100.04
	345	345	76.4295	82.5	345	100.039
	346	346	76.6113	82.6667	346	100.038
	347	347	76.7831	82.8333	347	100.038
	348	348	76.9461	83	348	100.037
	349	349	77.1352	83.1667	349	100.037
	350	350	77.301	83.3333	350	100.037
	351	351	77.4758	83.5	351	100.036
	352	352	77.6423	83.6667	352	100.036
	353	353	77.822	83.8333	353	100.036
	354	354	77.9868	84	354	100.035
	355	355	78.1542	84.1667	355	100.035
	356	356	78.3328	84.3333	356	100.034
	357	357	78.508	84.5	357	100.033
	358	358	78.6788	84.6667	358	100.032
	359	359	78.8624	84.8333	359	100.032
	360	360	79.0213	85	360	100.031
	361	361	79.1943	85.1667	361	100.031
	362	362	79.3686	85.3333	362	100.03
	363	363	79.5441	85.5	363	100.03
	364	364	79.7242	85.6667	364	100.029
	365	365	79.8977	85.8333	365	100.029
	366	366	80.0683	86	366	100.028
	367	367	80.2296	86.1667	367	100.028
	368	368	80.396	86.3333	368	100.027
	369	369	80.5701	86.5	369	100.026
	370	370	80.7373	86.6667	370	100.025
	371	371	80.9276	86.8333	371	100.024
	372	372	81.0988	87	372	100.023
	373	373	81.2744	87.1667	373	100.023
	374	374	81.4427	87.3333	374	100.022
	375	375	81.6081	87.5	375	100.022
	376	376	81.7831	87.6667	376	100.021
	377	377	81.9599	87.8333	377	100.02
	378	378	82.1276	88	378	100.019
	379	379	82.298	88.1667	379	100.018
	380	380	82.4697	88.3333	380	100.017
	381	381	82.6426	88.5	381	100.016
	382	382	82.8017	88.6667	382	100.015
	383	383	82.9812	88.8333	383	100.014
	384	384	83.1578	89	384	100.013
	385	385	83.3228	89.1667	385	100.012
	386	386	83.4972	89.3333	386	100.011
	387	387	83.6701	89.5	387	100.011
	388	388	83.8409	89.6667	388	100.009
	389	389	84.0087	89.8333	389	100.008
	390	390	84.1763	90	390	100.008
	391	391	84.3502	90.1667	391	100.007
	392	392	84.5254	90.3333	392	100.006
	393	393	84.7031	90.5	393	100.005
	394	394	84.8788	90.6667	394	100.004
	395	395	85.0472	90.8333	395	100.004
	396	396	85.2196	91	396	100.003
	397	397	85.3867	91.1667	397	100.002
	398	398	85.5593	91.3333	398	100.002
	399	399	85.7302	91.5	399	100.001
	400	400	85.9051	91.6667	400	99.9996
	401	401	86.0716	91.8333	401	99.9986
	402	402	86.2438	92	402	99.9972
	403	403	86.4045	92.1667	403	99.9955
	404	404	86.5833	92.3333	404	99.9937
	405	405	86.7629	92.5	405	99.9927
	406	406	86.9281	92.6667	406	99.9917
	407	407	87.0965	92.8333	407	99.9906
	408	408	87.2724	93	408	99.9895
	409	409	87.4446	93.1667	409	99.9891
	410	410	87.6139	93.3333	410	99.9883
	411	411	87.7853	93.5	411	99.9871
	412	412	87.9617	93.6667	412	99.9858
	413	413	88.1318	93.8333	413	99.9847
	414	414	88.3084	94	414	99.9841
	415	415	88.4784	94.1667	415	99.9836
	416	416	88.6519	94.3333	416	99.983
	417	417	88.8188	94.5	417	99.9826
	418	418	88.9945	94.6667	418	99.9816
	419	419	89.1586	94.8333	419	99.9803
	420	420	89.3347	95	420	99.9787
	421	421	89.4942	95.1667	421	99.9761
	422	422	89.6805	95.3333	422	99.974
	423	423	89.8538	95.5	423	99.9718
	424	424	90.0191	95.6667	424	99.9696
	425	425	90.192	95.8333	425	99.9679
	426	426	90.3632	96	426	99.9666
	427	427	90.5383	96.1667	427	99.9651
	428	428	90.7107	96.3333	428	99.9636
	429	429	90.8894	96.5	429	99.963
	430	430	91.0692	96.6667	430	99.962
	431	431	91.2294	96.8333	431	99.961
	432	432	91.3998	97	432	99.9602
	433	433	91.5591	97.1667	433	99.9588
	434	434	91.7344	97.3333	434	99.9572
	435	435	91.9042	97.5	435	99.9558
	436	436	92.0739	97.6667	436	99.9544
	437	437	92.252	97.8333	437	99.9529
	438	438	92.4291	98	438	99.9517
	439	439	92.5929	98.1667	439	99.9507
	440	440	92.7677	98.3333	440	99.9499
	441	441	92.9335	98.5	441	99.9494
	442	442	93.0954	98.6667	442	99.9483
	443	443	93.2791	98.8333	443	99.9469
	444	444	93.4514	99	444	99.9456
	445	445	93.6302	99.1667	445	99.9439
	446	446	93.8058	99.3333	446	99.9422
	447	447	93.9704	99.5	447	99.9403
	448	448	94.149	99.6667	448	99.9384
	449	449	94.3095	99.8333	449	99.9366
	450	450	94.4782	100	450	99.9349
	451	451	94.6485	100.167	451	99.9332
	452	452	94.8311	100.333	452	99.9312
	453	453	94.9842	100.5	453	99.9301
	454	454	95.1527	100.667	454	99.9293
	455	455	95.3275	100.833	455	99.9287
	456	456	95.4982	101	456	99.928
	457	457	95.6712	101.167	457	99.9276
	458	458	95.8514	101.333	458	99.9267
	459	459	96.0212	101.5	459	99.9257
	460	460	96.1845	101.667	460	99.9246
	461	461	96.3651	101.833	461	99.9224
	462	462	96.5425	102	462	99.9205
	463	463	96.7148	102.167	463	99.9188
	464	464	96.8794	102.333	464	99.9171
	465	465	97.0453	102.5	465	99.9149
	466	466	97.2203	102.667	466	99.9128
	467	467	97.4049	102.833	467	99.9108
	468	468	97.559	103	468	99.9089
	469	469	97.7371	103.167	469	99.9071
	470	470	97.9002	103.333	470	99.905
	471	471	98.0746	103.5	471	99.9029
	472	472	98.2446	103.667	472	99.9008
	473	473	98.4225	103.833	473	99.899
	474	474	98.5919	104	474	99.8969
	475	475	98.7692	104.167	475	99.8947
	476	476	98.9337	104.333	476	99.8925
	477	477	99.1078	104.5	477	99.8907
	478	478	99.28	104.667	478	99.8889
	479	479	99.4526	104.833	479	99.8869
	480	480	99.6191	105	480	99.8847
	481	481	99.7915	105.167	481	99.8829
	482	482	99.9605	105.333	482	99.8811
	483	483	100.134	105.5	483	99.8794
	484	484	100.301	105.667	484	99.8777
	485	485	100.47	105.833	485	99.8756
	486	486	100.649	106	486	99.8737
	487	487	100.817	106.167	487	99.8719
	488	488	100.991	106.333	488	99.8701
	489	489	101.168	106.5	489	99.8683
	490	490	101.33	106.667	490	99.8662
	491	491	101.511	106.833	491	99.8641
	492	492	101.678	107	492	99.862
	493	493	101.846	107.167	493	99.8597
	494	494	102.023	107.333	494	99.8571
	495	495	102.19	107.5	495	99.8548
	496	496	102.361	107.667	496	99.8528
	497	497	102.537	107.833	497	99.8509
	498	498	102.697	108	498	99.8489
	499	499	102.888	108.167	499	99.8469
	500	500	103.052	108.333	500	99.8451
	501	501	103.223	108.5	501	99.8434
	502	502	103.399	108.667	502	99.8416
	503	503	103.56	108.833	503	99.8395
	504	504	103.739	109	504	99.8375
	505	505	103.902	109.167	505	99.8355
	506	506	104.079	109.333	506	99.8336
	507	507	104.252	109.5	507	99.8317
	508	508	104.423	109.667	508	99.8296
	509	509	104.588	109.833	509	99.8275
	510	510	104.771	110	510	99.8258
	511	511	104.922	110.167	511	99.8238
	512	512	105.101	110.333	512	99.8213
	513	513	105.275	110.5	513	99.8184
	514	514	105.45	110.667	514	99.8152
	515	515	105.613	110.833	515	99.8124
	516	516	105.789	111	516	99.8097
	517	517	105.964	111.167	517	99.8071
	518	518	106.129	111.333	518	99.8041
	519	519	106.293	111.5	519	99.8014
	520	520	106.472	111.667	520	99.799
	521	521	106.643	111.833	521	99.7968
	522	522	106.816	112	522	99.7947
	523	523	106.983	112.167	523	99.7925
	524	524	107.155	112.333	524	99.7904
	525	525	107.333	112.5	525	99.7884
	526	526	107.516	112.667	526	99.7862
	527	527	107.679	112.833	527	99.7835
	528	528	107.848	113	528	99.7806
	529	529	108.018	113.167	529	99.7777
	530	530	108.194	113.333	530	99.7745
	531	531	108.35	113.5	531	99.7718
	532	532	108.527	113.667	532	99.769
	533	533	108.697	113.833	533	99.7662
	534	534	108.87	114	534	99.764
	535	535	109.045	114.167	535	99.7617
	536	536	109.224	114.333	536	99.7592
	537	537	109.387	114.5	537	99.7563
	538	538	109.553	114.667	538	99.7529
	539	539	109.734	114.833	539	99.7497
	540	540	109.905	115	540	99.7467
	541	541	110.079	115.167	541	99.7437
	542	542	110.248	115.333	542	99.7401
	543	543	110.42	115.5	543	99.7371
	544	544	110.594	115.667	544	99.7346
	545	545	110.756	115.833	545	99.7323
	546	546	110.929	116	546	99.7301
	547	547	111.1	116.167	547	99.7271
	548	548	111.277	116.333	548	99.7239
	549	549	111.449	116.5	549	99.7207
	550	550	111.619	116.667	550	99.7174
	551	551	111.787	116.833	551	99.7147
	552	552	111.957	117	552	99.7124
	553	553	112.123	117.167	553	99.7103
	554	554	112.297	117.333	554	99.7084
	555	555	112.463	117.5	555	99.7057
	556	556	112.637	117.667	556	99.7029
	557	557	112.81	117.833	557	99.7003
	558	558	112.976	118	558	99.6975
	559	559	113.148	118.167	559	99.6948
	560	560	113.319	118.333	560	99.6922
	561	561	113.494	118.5	561	99.6895
	562	562	113.671	118.667	562	99.6869
	563	563	113.843	118.833	563	99.684
	564	564	114.007	119	564	99.6808
	565	565	114.176	119.167	565	99.6775
	566	566	114.355	119.333	566	99.6737
	567	567	114.521	119.5	567	99.6691
	568	568	114.696	119.667	568	99.6646
	569	569	114.868	119.833	569	99.6604
	570	570	115.042	120	570	99.6564
	571	571	115.21	120.167	571	99.6524
	572	572	115.379	120.333	572	99.6483
	573	573	115.548	120.5	573	99.6441
	574	574	115.714	120.667	574	99.6401
	575	575	115.903	120.833	575	99.6372
	576	576	116.065	121	576	99.634
	577	577	116.237	121.167	577	99.6306
	578	578	116.399	121.333	578	99.627
	579	579	116.575	121.5	579	99.6235
	580	580	116.763	121.667	580	99.6202
	581	581	116.921	121.833	581	99.6169
	582	582	117.091	122	582	99.6135
	583	583	117.265	122.167	583	99.6092
	584	584	117.441	122.333	584	99.6051
	585	585	117.609	122.5	585	99.6014
	586	586	117.784	122.667	586	99.5977
	587	587	117.957	122.833	587	99.5933
	588	588	118.129	123	588	99.589
	589	589	118.3	123.167	589	99.585
	590	590	118.469	123.333	590	99.5811
	591	591	118.641	123.5	591	99.577
	592	592	118.81	123.667	592	99.5727
	593	593	118.977	123.833	593	99.5685
	594	594	119.159	124	594	99.5645
	595	595	119.325	124.167	595	99.5609
	596	596	119.483	124.333	596	99.5571
	597	597	119.658	124.5	597	99.5532
	598	598	119.833	124.667	598	99.5493
	599	599	120.012	124.833	599	99.546
	600	600	120.183	125	600	99.5422
	601	601	120.343	125.167	601	99.538
	602	602	120.527	125.333	602	99.5337
	603	603	120.698	125.5	603	99.5295
	604	604	120.868	125.667	604	99.5253
	605	605	121.034	125.833	605	99.5211
	606	606	121.208	126	606	99.517
	607	607	121.376	126.167	607	99.5127
	608	608	121.55	126.333	608	99.5083
	609	609	121.72	126.5	609	99.504
	610	610	121.893	126.667	610	99.4998
	611	611	122.058	126.833	611	99.4949
	612	612	122.234	127	612	99.4901
	613	613	122.413	127.167	613	99.4856
	614	614	122.579	127.333	614	99.4815
	615	615	122.747	127.5	615	99.478
	616	616	122.921	127.667	616	99.4749
	617	617	123.09	127.833	617	99.4721
	618	618	123.256	128	618	99.4691
	619	619	123.415	128.167	619	99.4668
	620	620	123.592	128.333	620	99.4635
	621	621	123.767	128.5	621	99.4597
	622	622	123.937	128.667	622	99.4554
	623	623	124.112	128.833	623	99.4497
	624	624	124.292	129	624	99.4447
	625	625	124.454	129.167	625	99.4396
	626	626	124.635	129.333	626	99.4344
	627	627	124.805	129.5	627	99.4291
	628	628	124.978	129.667	628	99.4238
	629	629	125.154	129.833	629	99.4185
	630	630	125.315	130	630	99.4131
	631	631	125.479	130.167	631	99.4077
	632	632	125.654	130.333	632	99.4022
	633	633	125.832	130.5	633	99.3967
	634	634	126.003	130.667	634	99.391
	635	635	126.174	130.833	635	99.3856
	636	636	126.338	131	636	99.38
	637	637	126.515	131.167	637	99.3742
	638	638	126.692	131.333	638	99.3685
	639	639	126.857	131.5	639	99.3632
	640	640	127.03	131.667	640	99.3576
	641	641	127.198	131.833	641	99.3519
	642	642	127.369	132	642	99.3461
	643	643	127.537	132.167	643	99.3408
	644	644	127.709	132.333	644	99.3353
	645	645	127.879	132.5	645	99.3299
	646	646	128.053	132.667	646	99.3244
	647	647	128.22	132.833	647	99.3189
	648	648	128.404	133	648	99.3133
	649	649	128.575	133.167	649	99.3081
	650	650	128.746	133.333	650	99.3029
	651	651	128.923	133.5	651	99.2977
	652	652	129.088	133.667	652	99.2924
	653	653	129.259	133.833	653	99.2869
	654	654	129.425	134	654	99.2814
	655	655	129.597	134.167	655	99.276
	656	656	129.771	134.333	656	99.27
	657	657	129.938	134.5	657	99.2641
	658	658	130.112	134.667	658	99.2583
	659	659	130.286	134.833	659	99.2526
	660	660	130.46	135	660	99.2471
	661	661	130.624	135.167	661	99.2417
	662	662	130.799	135.333	662	99.236
	663	663	130.974	135.5	663	99.2302
	664	664	131.141	135.667	664	99.2245
	665	665	131.307	135.833	665	99.2188
	666	666	131.477	136	666	99.2129
	667	667	131.652	136.167	667	99.207
	668	668	131.832	136.333	668	99.2005
	669	669	131.995	136.5	669	99.1943
	670	670	132.167	136.667	670	99.1883
	671	671	132.33	136.833	671	99.1825
	672	672	132.503	137	672	99.1764
	673	673	132.683	137.167	673	99.1702
	674	674	132.849	137.333	674	99.164
	675	675	133.018	137.5	675	99.1578
	676	676	133.192	137.667	676	99.1517
	677	677	133.371	137.833	677	99.1456
	678	678	133.529	138	678	99.1393
	679	679	133.708	138.167	679	99.1329
	680	680	133.876	138.333	680	99.1266
	681	681	134.049	138.5	681	99.1204
	682	682	134.224	138.667	682	99.1139
	683	683	134.396	138.833	683	99.1073
	684	684	134.559	139	684	99.1005
	685	685	134.738	139.167	685	99.0938
	686	686	134.912	139.333	686	99.0872
	687	687	135.079	139.5	687	99.0806
	688	688	135.251	139.667	688	99.0736
	689	689	135.43	139.833	689	99.0665
	690	690	135.596	140	690	99.0596
	691	691	135.771	140.167	691	99.0527
	692	692	135.948	140.333	692	99.0459
	693	693	136.109	140.5	693	99.0391
	694	694	136.285	140.667	694	99.0321
	695	695	136.453	140.833	695	99.0251
	696	696	136.63	141	696	99.0183
	697	697	136.797	141.167	697	99.0117
	698	698	136.968	141.333	698	99.0053
	699	699	137.139	141.5	699	98.999
	700	700	137.316	141.667	700	98.9925
	701	701	137.486	141.833	701	98.9857
	702	702	137.653	142	702	98.9789
	703	703	137.828	142.167	703	98.972
	704	704	138.007	142.333	704	98.9649
	705	705	138.181	142.5	705	98.958
	706	706	138.345	142.667	706	98.9508
	707	707	138.514	142.833	707	98.9434
	708	708	138.685	143	708	98.9353
	709	709	138.86	143.167	709	98.9271
	710	710	139.03	143.333	710	98.9191
	711	711	139.201	143.5	711	98.9111
	712	712	139.376	143.667	712	98.9021
	713	713	139.534	143.833	713	98.8937
	714	714	139.709	144	714	98.8861
	715	715	139.888	144.167	715	98.8791
	716	716	140.056	144.333	716	98.8738
	717	717	140.225	144.5	717	98.8681
	718	718	140.408	144.667	718	98.8622
	719	719	140.583	144.833	719	98.8562
	720	720	140.739	145	720	98.8497
	721	721	140.918	145.167	721	98.8432
	722	722	141.088	145.333	722	98.8361
	723	723	141.268	145.5	723	98.8286
	724	724	141.431	145.667	724	98.8205
	725	725	141.598	145.833	725	98.8107
	726	726	141.777	146	726	98.8018
	727	727	141.948	146.167	727	98.7933
	728	728	142.122	146.333	728	98.7848
	729	729	142.303	146.5	729	98.7767
	730	730	142.465	146.667	730	98.7685
	731	731	142.637	146.833	731	98.7601
	732	732	142.806	147	732	98.7516
	733	733	142.967	147.167	733	98.7437
	734	734	143.142	147.333	734	98.7353
	735	735	143.326	147.5	735	98.7267
	736	736	143.49	147.667	736	98.718
	737	737	143.66	147.833	737	98.7098
	738	738	143.836	148	738	98.7015
	739	739	144.006	148.167	739	98.6931
	740	740	144.176	148.333	740	98.6847
	741	741	144.348	148.5	741	98.677
	742	742	144.521	148.667	742	98.669
	743	743	144.687	148.833	743	98.6609
	744	744	144.856	149	744	98.653
	745	745	145.038	149.167	745	98.6451
	746	746	145.211	149.333	746	98.637
	747	747	145.38	149.5	747	98.6286
	748	748	145.541	149.667	748	98.62
	749	749	145.722	149.833	749	98.6106
	750	750	145.894	150	750	98.6009
	751	751	146.065	150.167	751	98.591
	752	752	146.23	150.333	752	98.5808
	753	753	146.408	150.5	753	98.5692
	754	754	146.582	150.667	754	98.5581
	755	755	146.756	150.833	755	98.547
	756	756	146.919	151	756	98.536
	757	757	147.09	151.167	757	98.525
	758	758	147.267	151.333	758	98.5143
	759	759	147.431	151.5	759	98.5035
	760	760	147.606	151.667	760	98.4927
	761	761	147.781	151.833	761	98.4828
	762	762	147.959	152	762	98.4728
	763	763	148.126	152.167	763	98.4629
	764	764	148.287	152.333	764	98.453
	765	765	148.466	152.5	765	98.4431
	766	766	148.638	152.667	766	98.4331
	767	767	148.802	152.833	767	98.4232
	768	768	148.973	153	768	98.4133
	769	769	149.144	153.167	769	98.4031
	770	770	149.319	153.333	770	98.3928
	771	771	149.49	153.5	771	98.3824
	772	772	149.662	153.667	772	98.3722
	773	773	149.839	153.833	773	98.3621
	774	774	150.005	154	774	98.3521
	775	775	150.172	154.167	775	98.3421
	776	776	150.346	154.333	776	98.3318
	777	777	150.511	154.5	777	98.3215
	778	778	150.691	154.667	778	98.3112
	779	779	150.859	154.833	779	98.3009
	780	780	151.024	155	780	98.2906
	781	781	151.201	155.167	781	98.2794
	782	782	151.377	155.333	782	98.2684
	783	783	151.553	155.5	783	98.2574
	784	784	151.715	155.667	784	98.2466
	785	785	151.895	155.833	785	98.2355
	786	786	152.069	156	786	98.2246
	787	787	152.235	156.167	787	98.2135
	788	788	152.406	156.333	788	98.2023
	789	789	152.577	156.5	789	98.1909
	790	790	152.742	156.667	790	98.1798
	791	791	152.92	156.833	791	98.1684
	792	792	153.091	157	792	98.1568
	793	793	153.266	157.167	793	98.1451
	794	794	153.44	157.333	794	98.1336
	795	795	153.617	157.5	795	98.1224
	796	796	153.792	157.667	796	98.1112
	797	797	153.963	157.833	797	98.1001
	798	798	154.131	158	798	98.0888
	799	799	154.294	158.167	799	98.0773
	800	800	154.467	158.333	800	98.0659
	801	801	154.644	158.5	801	98.0545
	802	802	154.806	158.667	802	98.0428
	803	803	154.977	158.833	803	98.0309
	804	804	155.149	159	804	98.0189
	805	805	155.329	159.167	805	98.0069
	806	806	155.501	159.333	806	97.995
	807	807	155.668	159.5	807	97.9832
	808	808	155.842	159.667	808	97.9714
	809	809	156.012	159.833	809	97.9594
	810	810	156.182	160	810	97.9469
	811	811	156.357	160.167	811	97.9344
	812	812	156.52	160.333	812	97.9221
	813	813	156.699	160.5	813	97.9098
	814	814	156.868	160.667	814	97.8968
	815	815	157.04	160.833	815	97.8839
	816	816	157.213	161	816	97.8711
	817	817	157.387	161.167	817	97.8585
	818	818	157.558	161.333	818	97.8459
	819	819	157.738	161.5	819	97.8332
	820	820	157.898	161.667	820	97.8202
	821	821	158.064	161.833	821	97.8071
	822	822	158.241	162	822	97.7941
	823	823	158.411	162.167	823	97.7811
	824	824	158.574	162.333	824	97.7683
	825	825	158.758	162.5	825	97.7557
	826	826	158.92	162.667	826	97.7431
	827	827	159.099	162.833	827	97.7302
	828	828	159.281	163	828	97.7169
	829	829	159.442	163.167	829	97.7035
	830	830	159.624	163.333	830	97.6901
	831	831	159.787	163.5	831	97.6769
	832	832	159.96	163.667	832	97.6635
	833	833	160.128	163.833	833	97.6498
	834	834	160.307	164	834	97.6359
	835	835	160.48	164.167	835	97.6221
	836	836	160.645	164.333	836	97.6083
	837	837	160.821	164.5	837	97.5946
	838	838	160.985	164.667	838	97.58
	839	839	161.159	164.833	839	97.5656
	840	840	161.333	165	840	97.5514
	841	841	161.512	165.167	841	97.5372
	842	842	161.673	165.333	842	97.5229
	843	843	161.845	165.5	843	97.5089
	844	844	162.026	165.667	844	97.495
	845	845	162.194	165.833	845	97.481
	846	846	162.359	166	846	97.4669
	847	847	162.538	166.167	847	97.4526
	848	848	162.708	166.333	848	97.4383
	849	849	162.886	166.5	849	97.424
	850	850	163.051	166.667	850	97.4086
	851	851	163.222	166.833	851	97.3934
	852	852	163.395	167	852	97.3784
	853	853	163.568	167.167	853	97.3633
	854	854	163.728	167.333	854	97.3483
	855	855	163.901	167.5	855	97.3336
	856	856	164.078	167.667	856	97.3191
	857	857	164.255	167.833	857	97.3047
	858	858	164.42	168	858	97.291
	859	859	164.603	168.167	859	97.2768
	860	860	164.77	168.333	860	97.2622
	861	861	164.942	168.5	861	97.2474
	862	862	165.115	168.667	862	97.2321
	863	863	165.287	168.833	863	97.217
	864	864	165.447	169	864	97.2017
	865	865	165.628	169.167	865	97.1863
	866	866	165.793	169.333	866	97.1698
	867	867	165.965	169.5	867	97.1535
	868	868	166.144	169.667	868	97.1374
	869	869	166.308	169.833	869	97.1212
	870	870	166.477	170	870	97.1042
	871	871	166.657	170.167	871	97.0873
	872	872	166.828	170.333	872	97.0706
	873	873	167	170.5	873	97.0539
	874	874	167.169	170.667	874	97.0372
	875	875	167.332	170.833	875	97.0205
	876	876	167.51	171	876	97.0037
	877	877	167.681	171.167	877	96.9868
	878	878	167.861	171.333	878	96.9702
	879	879	168.027	171.5	879	96.9536
	880	880	168.201	171.667	880	96.9369
	881	881	168.374	171.833	881	96.92
	882	882	168.538	172	882	96.9025
	883	883	168.715	172.167	883	96.8854
	884	884	168.879	172.333	884	96.8683
	885	885	169.052	172.5	885	96.8511
	886	886	169.228	172.667	886	96.8335
	887	887	169.403	172.833	887	96.8155
	888	888	169.567	173	888	96.7976
	889	889	169.751	173.167	889	96.78
	890	890	169.925	173.333	890	96.7621
	891	891	170.091	173.5	891	96.7441
	892	892	170.257	173.667	892	96.7259
	893	893	170.433	173.833	893	96.7077
	894	894	170.604	174	894	96.6895
	895	895	170.769	174.167	895	96.6713
	896	896	170.94	174.333	896	96.6532
	897	897	171.111	174.5	897	96.6349
	898	898	171.29	174.667	898	96.6164
	899	899	171.462	174.833	899	96.5979
	900	900	171.628	175	900	96.5795
	901	901	171.806	175.167	901	96.5612
	902	902	171.981	175.333	902	96.5429
	903	903	172.143	175.5	903	96.5242
	904	904	172.316	175.667	904	96.5052
	905	905	172.483	175.833	905	96.4862
	906	906	172.659	176	906	96.4671
	907	907	172.833	176.167	907	96.4477
	908	908	173.005	176.333	908	96.4286
	909	909	173.166	176.5	909	96.4093
	910	910	173.336	176.667	910	96.3897
	911	911	173.511	176.833	911	96.3702
	912	912	173.691	177	912	96.3507
	913	913	173.868	177.167	913	96.3313
	914	914	174.035	177.333	914	96.312
	915	915	174.197	177.5	915	96.2925
	916	916	174.368	177.667	916	96.2729
	917	917	174.543	177.833	917	96.2531
	918	918	174.715	178	918	96.2333
	919	919	174.889	178.167	919	96.2134
	920	920	175.069	178.333	920	96.1937
	921	921	175.239	178.5	921	96.1739
	922	922	175.406	178.667	922	96.1538
	923	923	175.585	178.833	923	96.133
	924	924	175.76	179	924	96.1124
	925	925	175.925	179.167	925	96.0918
	926	926	176.093	179.333	926	96.071
	927	927	176.257	179.5	927	96.0492
	928	928	176.432	179.667	928	96.0277
	929	929	176.605	179.833	929	96.0065
	930	930	176.771	180	930	95.9852
	931	931	176.936	180.167	931	95.9639
	932	932	177.113	180.333	932	95.9429
	933	933	177.297	180.5	933	95.9217
	934	934	177.465	180.667	934	95.9003
	935	935	177.633	180.833	935	95.8791
	936	936	177.806	181	936	95.858
	937	937	177.98	181.167	937	95.8369
	938	938	178.151	181.333	938	95.8158
	939	939	178.322	181.5	939	95.7939
	940	940	178.497	181.667	940	95.772
	941	941	178.653	181.833	941	95.75
	942	942	178.838	182	942	95.7281
	943	943	179.007	182.167	943	95.7058
	944	944	179.175	182.333	944	95.6838
	945	945	179.351	182.5	945	95.6615
	946	946	179.523	182.667	946	95.6388
	947	947	179.699	182.833	947	95.6162
	948	948	179.866	183	948	95.5935
	949	949	180.04	183.167	949	95.5708
	950	950	180.206	183.333	950	95.548
	951	951	180.384	183.5	951	95.5248
	952	952	180.549	183.667	952	95.5013
	953	953	180.735	183.833	953	95.4779
	954	954	180.9	184	954	95.4547
	955	955	181.068	184.167	955	95.4315
	956	956	181.237	184.333	956	95.4082
	957	957	181.412	184.5	957	95.3847
	958	958	181.587	184.667	958	95.361
	959	959	181.752	184.833	959	95.3368
	960	960	181.922	185	960	95.3132
	961	961	182.091	185.167	961	95.2896
	962	962	182.264	185.333	962	95.2659
	963	963	182.434	185.5	963	95.2421
	964	964	182.608	185.667	964	95.2176
	965	965	182.786	185.833	965	95.1932
	966	966	182.952	186	966	95.1688
	967	967	183.121	186.167	967	95.1443
	968	968	183.294	186.333	968	95.1195
	969	969	183.468	186.5	969	95.0948
	970	970	183.643	186.667	970	95.0698
	971	971	183.819	186.833	971	95.0446
	972	972	183.987	187	972	95.0196
	973	973	184.157	187.167	973	94.9946
	974	974	184.327	187.333	974	94.9697
	975	975	184.501	187.5	975	94.9445
	976	976	184.67	187.667	976	94.9186
	977	977	184.846	187.833	977	94.8929
	978	978	185.017	188	978	94.8674
	979	979	185.181	188.167	979	94.8418
	980	980	185.348	188.333	980	94.8159
	981	981	185.536	188.5	981	94.7902
	982	982	185.702	188.667	982	94.7642
	983	983	185.866	188.833	983	94.7379
	984	984	186.04	189	984	94.712
	985	985	186.216	189.167	985	94.686
	986	986	186.387	189.333	986	94.6599
	987	987	186.56	189.5	987	94.6339
	988	988	186.733	189.667	988	94.607
	989	989	186.902	189.833	989	94.5801
	990	990	187.069	190	990	94.5531
	991	991	187.25	190.167	991	94.526
	992	992	187.424	190.333	992	94.4984
	993	993	187.591	190.5	993	94.4714
	994	994	187.749	190.667	994	94.4444
	995	995	187.93	190.833	995	94.4172
	996	996	188.105	191	996	94.3899
	997	997	188.267	191.167	997	94.3623
	998	998	188.446	191.333	998	94.3348
	999	999	188.625	191.5	999	94.3072
	1000	1000	188.782	191.667	1000	94.2787
	1001	1001	188.954	191.833	1001	94.2503
	1002	1002	189.139	192	1002	94.2219
	1003	1003	189.296	192.167	1003	94.1934
	1004	1004	189.47	192.333	1004	94.1649
	1005	1005	189.642	192.5	1005	94.1366
	1006	1006	189.816	192.667	1006	94.1084
	1007	1007	189.988	192.833	1007	94.0803
	1008	1008	190.161	193	1008	94.0519
	1009	1009	190.33	193.167	1009	94.023
	1010	1010	190.5	193.333	1010	93.994
	1011	1011	190.68	193.5	1011	93.965
	1012	1012	190.845	193.667	1012	93.9352
	1013	1013	191.012	193.833	1013	93.9058
	1014	1014	191.183	194	1014	93.876
	1015	1015	191.352	194.167	1015	93.846
	1016	1016	191.52	194.333	1016	93.816
	1017	1017	191.7	194.5	1017	93.7859
	1018	1018	191.876	194.667	1018	93.756
	1019	1019	192.05	194.833	1019	93.7259
	1020	1020	192.213	195	1020	93.6951
	1021	1021	192.384	195.167	1021	93.6642
	1022	1022	192.555	195.333	1022	93.6335
	1023	1023	192.725	195.5	1023	93.6027
	1024	1024	192.897	195.667	1024	93.5716
	1025	1025	193.075	195.833	1025	93.5408
	1026	1026	193.251	196	1026	93.5098
	1027	1027	193.415	196.167	1027	93.4784
	1028	1028	193.589	196.333	1028	93.4472
	1029	1029	193.761	196.5	1029	93.4157
	1030	1030	193.932	196.667	1030	93.3842
	1031	1031	194.101	196.833	1031	93.3527
	1032	1032	194.269	197	1032	93.321
	1033	1033	194.448	197.167	1033	93.2888
	1034	1034	194.62	197.333	1034	93.2565
	1035	1035	194.781	197.5	1035	93.2242
	1036	1036	194.956	197.667	1036	93.1922
	1037	1037	195.132	197.833	1037	93.1599
	1038	1038	195.302	198	1038	93.1274
	1039	1039	195.476	198.167	1039	93.0947
	1040	1040	195.646	198.333	1040	93.0619
	1041	1041	195.823	198.5	1041	93.0288
	1042	1042	195.995	198.667	1042	92.9958
	1043	1043	196.164	198.833	1043	92.9629
	1044	1044	196.331	199	1044	92.9301
	1045	1045	196.498	199.167	1045	92.8972
	1046	1046	196.675	199.333	1046	92.8643
	1047	1047	196.842	199.5	1047	92.8313
	1048	1048	197.014	199.667	1048	92.7981
	1049	1049	197.185	199.833	1049	92.7642
	1050	1050	197.364	200	1050	92.7303
	1051	1051	197.531	200.167	1051	92.6962
	1052	1052	197.698	200.333	1052	92.6622
	1053	1053	197.879	200.5	1053	92.627
	1054	1054	198.05	200.667	1054	92.592
	1055	1055	198.217	200.833	1055	92.557
	1056	1056	198.384	201	1056	92.522
	1057	1057	198.555	201.167	1057	92.4869
	1058	1058	198.737	201.333	1058	92.4519
	1059	1059	198.9	201.5	1059	92.4165
	1060	1060	199.08	201.667	1060	92.3807
	1061	1061	199.245	201.833	1061	92.3449
	1062	1062	199.421	202	1062	92.3092
	1063	1063	199.594	202.167	1063	92.2734
	1064	1064	199.761	202.333	1064	92.2377
	1065	1065	199.934	202.5	1065	92.2018
	1066	1066	200.11	202.667	1066	92.1658
	1067	1067	200.275	202.833	1067	92.1294
	1068	1068	200.446	203	1068	92.0929
	1069	1069	200.613	203.167	1069	92.0563
	1070	1070	200.784	203.333	1070	92.0198
	1071	1071	200.954	203.5	1071	91.9833
	1072	1072	201.128	203.667	1072	91.9467
	1073	1073	201.303	203.833	1073	91.9094
	1074	1074	201.471	204	1074	91.8719
	1075	1075	201.647	204.167	1075	91.8344
	1076	1076	201.818	204.333	1076	91.7968
	1077	1077	201.985	204.5	1077	91.7587
	1078	1078	202.166	204.667	1078	91.7209
	1079	1079	202.327	204.833	1079	91.6828
	1080	1080	202.496	205	1080	91.6444
	1081	1081	202.678	205.167	1081	91.606
	1082	1082	202.838	205.333	1082	91.5675
	1083	1083	203.023	205.5	1083	91.529
	1084	1084	203.185	205.667	1084	91.4904
	1085	1085	203.353	205.833	1085	91.4515
	1086	1086	203.525	206	1086	91.4125
	1087	1087	203.698	206.167	1087	91.3731
	1088	1088	203.865	206.333	1088	91.3337
	1089	1089	204.032	206.5	1089	91.294
	1090	1090	204.202	206.667	1090	91.2544
	1091	1091	204.38	206.833	1091	91.2149
	1092	1092	204.552	207	1092	91.1752
	1093	1093	204.721	207.167	1093	91.1349
	1094	1094	204.906	207.333	1094	91.0945
	1095	1095	205.072	207.5	1095	91.0541
	1096	1096	205.246	207.667	1096	91.0136
	1097	1097	205.416	207.833	1097	90.9726
	1098	1098	205.585	208	1098	90.9315
	1099	1099	205.754	208.167	1099	90.8902
	1100	1100	205.921	208.333	1100	90.8488
	1101	1101	206.088	208.5	1101	90.8071
	1102	1102	206.269	208.667	1102	90.7654
	1103	1103	206.435	208.833	1103	90.7238
	1104	1104	206.614	209	1104	90.6819
	1105	1105	206.784	209.167	1105	90.6393
	1106	1106	206.957	209.333	1106	90.5969
	1107	1107	207.126	209.5	1107	90.5545
	1108	1108	207.304	209.667	1108	90.5123
	1109	1109	207.471	209.833	1109	90.4696
	1110	1110	207.637	210	1110	90.4274
	1111	1111	207.807	210.167	1111	90.3853
	1112	1112	207.98	210.333	1112	90.3431
	1113	1113	208.151	210.5	1113	90.3003
	1114	1114	208.328	210.667	1114	90.2577
	1115	1115	208.504	210.833	1115	90.2145
	1116	1116	208.672	211	1116	90.1713
	1117	1117	208.848	211.167	1117	90.1274
	1118	1118	209.013	211.333	1118	90.0832
	1119	1119	209.18	211.5	1119	90.0393
	1120	1120	209.362	211.667	1120	89.9953
	1121	1121	209.527	211.833	1121	89.9507
	1122	1122	209.701	212	1122	89.9064
	1123	1123	209.881	212.167	1123	89.8617
	1124	1124	210.044	212.333	1124	89.8167
	1125	1125	210.214	212.5	1125	89.7719
	1126	1126	210.382	212.667	1126	89.7264
	1127	1127	210.557	212.833	1127	89.6811
	1128	1128	210.729	213	1128	89.6355
	1129	1129	210.905	213.167	1129	89.5899
	1130	1130	211.076	213.333	1130	89.5445
	1131	1131	211.252	213.5	1131	89.4989
	1132	1132	211.417	213.667	1132	89.4529
	1133	1133	211.583	213.833	1133	89.4065
	1134	1134	211.753	214	1134	89.3595
	1135	1135	211.923	214.167	1135	89.3126
	1136	1136	212.095	214.333	1136	89.2658
	1137	1137	212.262	214.5	1137	89.219
	1138	1138	212.438	214.667	1138	89.1715
	1139	1139	212.61	214.833	1139	89.1243
	1140	1140	212.782	215	1140	89.0767
	1141	1141	212.958	215.167	1141	89.029
	1142	1142	213.128	215.333	1142	88.9811
	1143	1143	213.294	215.5	1143	88.9332
	1144	1144	213.464	215.667	1144	88.8853
	1145	1145	213.636	215.833	1145	88.8374
	1146	1146	213.815	216	1146	88.7887
	1147	1147	213.985	216.167	1147	88.74
	1148	1148	214.156	216.333	1148	88.6911
	1149	1149	214.326	216.5	1149	88.6422
	1150	1150	214.487	216.667	1150	88.5928
	1151	1151	214.66	216.833	1151	88.5436
	1152	1152	214.844	217	1152	88.4943
	1153	1153	215.009	217.167	1153	88.4448
	1154	1154	215.179	217.333	1154	88.3945
	1155	1155	215.352	217.5	1155	88.3444
	1156	1156	215.526	217.667	1156	88.2942
	1157	1157	215.695	217.833	1157	88.2438
	1158	1158	215.875	218	1158	88.192
	1159	1159	216.046	218.167	1159	88.1406
	1160	1160	216.213	218.333	1160	88.0894
	1161	1161	216.382	218.5	1161	88.0382
	1162	1162	216.554	218.667	1162	87.9865
	1163	1163	216.727	218.833	1163	87.9352
	1164	1164	216.9	219	1164	87.8838
	1165	1165	217.063	219.167	1165	87.8322
	1166	1166	217.235	219.333	1166	87.7801
	1167	1167	217.411	219.5	1167	87.7279
	1168	1168	217.586	219.667	1168	87.6756
	1169	1169	217.755	219.833	1169	87.6233
	1170	1170	217.92	220	1170	87.5701
	1171	1171	218.095	220.167	1171	87.5175
	1172	1172	218.267	220.333	1172	87.4648
	1173	1173	218.437	220.5	1173	87.4118
	1174	1174	218.605	220.667	1174	87.3586
	1175	1175	218.774	220.833	1175	87.3051
	1176	1176	218.955	221	1176	87.2515
	1177	1177	219.114	221.167	1177	87.1979
	1178	1178	219.29	221.333	1178	87.1434
	1179	1179	219.464	221.5	1179	87.089
	1180	1180	219.636	221.667	1180	87.0342
	1181	1181	219.813	221.833	1181	86.9793
	1182	1182	219.977	222	1182	86.924
	1183	1183	220.141	222.167	1183	86.8688
	1184	1184	220.32	222.333	1184	86.8138
	1185	1185	220.497	222.5	1185	86.7588
	1186	1186	220.664	222.667	1186	86.7032
	1187	1187	220.832	222.833	1187	86.6476
	1188	1188	220.999	223	1188	86.5916
	1189	1189	221.178	223.167	1189	86.5355
	1190	1190	221.346	223.333	1190	86.4788
	1191	1191	221.517	223.5	1191	86.4218
	1192	1192	221.7	223.667	1192	86.3647
	1193	1193	221.858	223.833	1193	86.3073
	1194	1194	222.032	224	1194	86.2497
	1195	1195	222.206	224.167	1195	86.1918
	1196	1196	222.376	224.333	1196	86.134
	1197	1197	222.546	224.5	1197	86.0764
	1198	1198	222.716	224.667	1198	86.0189
	1199	1199	222.881	224.833	1199	85.9605
	1200	1200	223.058	225	1200	85.902
	1201	1201	223.228	225.167	1201	85.8432
	1202	1202	223.412	225.333	1202	85.7844
	1203	1203	223.581	225.5	1203	85.7248
	1204	1204	223.743	225.667	1204	85.6656
	1205	1205	223.918	225.833	1205	85.6065
	1206	1206	224.088	226	1206	85.5473
	1207	1207	224.259	226.167	1207	85.4875
	1208	1208	224.429	226.333	1208	85.4275
	1209	1209	224.595	226.5	1209	85.3673
	1210	1210	224.771	226.667	1210	85.307
	1211	1211	224.949	226.833	1211	85.246
	1212	1212	225.115	227	1212	85.1855
	1213	1213	225.286	227.167	1213	85.1249
	1214	1214	225.45	227.333	1214	85.0641
	1215	1215	225.625	227.5	1215	85.0027
	1216	1216	225.792	227.667	1216	84.9412
	1217	1217	225.967	227.833	1217	84.8794
	1218	1218	226.133	228	1218	84.8176
	1219	1219	226.304	228.167	1219	84.7548
	1220	1220	226.476	228.333	1220	84.6926
	1221	1221	226.649	228.5	1221	84.6301
	1222	1222	226.818	228.667	1222	84.5674
	1223	1223	226.987	228.833	1223	84.5043
	1224	1224	227.158	229	1224	84.4411
	1225	1225	227.339	229.167	1225	84.3778
	1226	1226	227.512	229.333	1226	84.3144
	1227	1227	227.683	229.5	1227	84.2503
	1228	1228	227.855	229.667	1228	84.1866
	1229	1229	228.023	229.833	1229	84.1224
	1230	1230	228.19	230	1230	84.0579
	1231	1231	228.365	230.167	1231	83.9931
	1232	1232	228.536	230.333	1232	83.9284
	1233	1233	228.707	230.5	1233	83.8635
	1234	1234	228.88	230.667	1234	83.7986
	1235	1235	229.055	230.833	1235	83.7328
	1236	1236	229.222	231	1236	83.6677
	1237	1237	229.392	231.167	1237	83.603
	1238	1238	229.558	231.333	1238	83.5385
	1239	1239	229.731	231.5	1239	83.4742
	1240	1240	229.897	231.667	1240	83.4094
	1241	1241	230.073	231.833	1241	83.344
	1242	1242	230.246	232	1242	83.2782
	1243	1243	230.415	232.167	1243	83.2113
	1244	1244	230.58	232.333	1244	83.1442
	1245	1245	230.751	232.5	1245	83.0764
	1246	1246	230.929	232.667	1246	83.008
	1247	1247	231.099	232.833	1247	82.9376
	1248	1248	231.265	233	1248	82.8679
	1249	1249	231.443	233.167	1249	82.7981
	1250	1250	231.619	233.333	1250	82.728
	1251	1251	231.784	233.5	1251	82.6568
	1252	1252	231.949	233.667	1252	82.586
	1253	1253	232.132	233.833	1253	82.5153
	1254	1254	232.311	234	1254	82.4445
	1255	1255	232.472	234.167	1255	82.3727
	1256	1256	232.64	234.333	1256	82.301
	1257	1257	232.81	234.5	1257	82.2295
	1258	1258	232.98	234.667	1258	82.158
	1259	1259	233.158	234.833	1259	82.0861
	1260	1260	233.326	235	1260	82.014
	1261	1261	233.499	235.167	1261	81.9418
	1262	1262	233.668	235.333	1262	81.8695
	1263	1263	233.839	235.5	1263	81.7971
	1264	1264	234.003	235.667	1264	81.7247
	1265	1265	234.177	235.833	1265	81.6522
	1266	1266	234.349	236	1266	81.5794
	1267	1267	234.522	236.167	1267	81.5057
	1268	1268	234.689	236.333	1268	81.4321
	1269	1269	234.867	236.5	1269	81.3584
	1270	1270	235.035	236.667	1270	81.2847
	1271	1271	235.2	236.833	1271	81.2101
	1272	1272	235.37	237	1272	81.1359
	1273	1273	235.544	237.167	1273	81.0619
	1274	1274	235.715	237.333	1274	80.9878
	1275	1275	235.882	237.5	1275	80.9131
	1276	1276	236.051	237.667	1276	80.8385
	1277	1277	236.218	237.833	1277	80.7631
	1278	1278	236.393	238	1278	80.6874
	1279	1279	236.57	238.167	1279	80.6111
	1280	1280	236.748	238.333	1280	80.5341
	1281	1281	236.909	238.5	1281	80.4574
	1282	1282	237.08	238.667	1282	80.3804
	1283	1283	237.259	238.833	1283	80.3026
	1284	1284	237.434	239	1284	80.2252
	1285	1285	237.594	239.167	1285	80.1477
	1286	1286	237.764	239.333	1286	80.0701
	1287	1287	237.939	239.5	1287	79.9921
	1288	1288	238.109	239.667	1288	79.913
	1289	1289	238.275	239.833	1289	79.8342
	1290	1290	238.45	240	1290	79.7553
	1291	1291	238.618	240.167	1291	79.6763
	1292	1292	238.789	240.333	1292	79.5966
	1293	1293	238.959	240.5	1293	79.5173
	1294	1294	239.133	240.667	1294	79.4377
	1295	1295	239.299	240.833	1295	79.3579
	1296	1296	239.476	241	1296	79.2775
	1297	1297	239.65	241.167	1297	79.197
	1298	1298	239.818	241.333	1298	79.1164
	1299	1299	239.979	241.5	1299	79.0357
	1300	1300	240.148	241.667	1300	78.9538
	1301	1301	240.33	241.833	1301	78.8726
	1302	1302	240.503	242	1302	78.7919
	1303	1303	240.672	242.167	1303	78.7115
	1304	1304	240.84	242.333	1304	78.6306
	1305	1305	241.015	242.5	1305	78.549
	1306	1306	241.181	242.667	1306	78.4666
	1307	1307	241.355	242.833	1307	78.3837
	1308	1308	241.525	243	1308	78.2993
	1309	1309	241.688	243.167	1309	78.215
	1310	1310	241.853	243.333	1310	78.1304
	1311	1311	242.033	243.5	1311	78.0455
	1312	1312	242.201	243.667	1312	77.9594
	1313	1313	242.375	243.833	1313	77.8739
	1314	1314	242.545	244	1314	77.7887
	1315	1315	242.715	244.167	1315	77.7035
	1316	1316	242.88	244.333	1316	77.6183
	1317	1317	243.055	244.5	1317	77.5328
	1318	1318	243.225	244.667	1318	77.4468
	1319	1319	243.393	244.833	1319	77.3607
	1320	1320	243.573	245	1320	77.2741
	1321	1321	243.741	245.167	1321	77.1874
	1322	1322	243.908	245.333	1322	77.1006
	1323	1323	244.077	245.5	1323	77.0137
	1324	1324	244.257	245.667	1324	76.9265
	1325	1325	244.424	245.833	1325	76.8396
	1326	1326	244.595	246	1326	76.7524
	1327	1327	244.763	246.167	1327	76.6649
	1328	1328	244.934	246.333	1328	76.5771
	1329	1329	245.101	246.5	1329	76.489
	1330	1330	245.272	246.667	1330	76.4006
	1331	1331	245.446	246.833	1331	76.3122
	1332	1332	245.618	247	1332	76.2222
	1333	1333	245.785	247.167	1333	76.132
	1334	1334	245.958	247.333	1334	76.0414
	1335	1335	246.129	247.5	1335	75.9508
	1336	1336	246.293	247.667	1336	75.8593
	1337	1337	246.467	247.833	1337	75.7684
	1338	1338	246.639	248	1338	75.6775
	1339	1339	246.806	248.167	1339	75.5865
	1340	1340	246.975	248.333	1340	75.4956
	1341	1341	247.144	248.5	1341	75.4043
	1342	1342	247.312	248.667	1342	75.3126
	1343	1343	247.48	248.833	1343	75.2203
	1344	1344	247.649	249	1344	75.1269
	1345	1345	247.827	249.167	1345	75.0332
	1346	1346	247.991	249.333	1346	74.9392
	1347	1347	248.172	249.5	1347	74.845
	1348	1348	248.35	249.667	1348	74.7499
	1349	1349	248.522	249.833	1349	74.6548
	1350	1350	248.687	250	1350	74.56
	1351	1351	248.859	250.167	1351	74.4652
	1352	1352	249.026	250.333	1352	74.3699
	1353	1353	249.199	250.5	1353	74.2754
	1354	1354	249.369	250.667	1354	74.1802
	1355	1355	249.535	250.833	1355	74.0846
	1356	1356	249.704	251	1356	73.9888
	1357	1357	249.879	251.167	1357	73.8921
	1358	1358	250.042	251.333	1358	73.7956
	1359	1359	250.224	251.5	1359	73.6991
	1360	1360	250.382	251.667	1360	73.6023
	1361	1361	250.564	251.833	1361	73.5043
	1362	1362	250.732	252	1362	73.4064
	1363	1363	250.902	252.167	1363	73.3083
	1364	1364	251.073	252.333	1364	73.2101
	1365	1365	251.236	252.5	1365	73.111
	1366	1366	251.404	252.667	1366	73.0123
	1367	1367	251.579	252.833	1367	72.9135
	1368	1368	251.748	253	1368	72.8143
	1369	1369	251.928	253.167	1369	72.7144
	1370	1370	252.099	253.333	1370	72.6144
	1371	1371	252.267	253.5	1371	72.5142
	1372	1372	252.438	253.667	1372	72.414
	1373	1373	252.601	253.833	1373	72.3125
	1374	1374	252.779	254	1374	72.2116
	1375	1375	252.948	254.167	1375	72.1106
	1376	1376	253.125	254.333	1376	72.0094
	1377	1377	253.288	254.5	1377	71.9076
	1378	1378	253.462	254.667	1378	71.8055
	1379	1379	253.627	254.833	1379	71.7032
	1380	1380	253.805	255	1380	71.6007
	1381	1381	253.974	255.167	1381	71.497
	1382	1382	254.144	255.333	1382	71.3938
	1383	1383	254.309	255.5	1383	71.2907
	1384	1384	254.485	255.667	1384	71.1875
	1385	1385	254.654	255.833	1385	71.0835
	1386	1386	254.82	256	1386	70.9789
	1387	1387	254.992	256.167	1387	70.8741
	1388	1388	255.167	256.333	1388	70.7692
	1389	1389	255.333	256.5	1389	70.6628
	1390	1390	255.509	256.667	1390	70.5571
	1391	1391	255.68	256.833	1391	70.4514
	1392	1392	255.85	257	1392	70.3456
	1393	1393	256.021	257.167	1393	70.2389
	1394	1394	256.188	257.333	1394	70.1319
	1395	1395	256.353	257.5	1395	70.0247
	1396	1396	256.524	257.667	1396	69.9174
	1397	1397	256.708	257.833	1397	69.8088
	1398	1398	256.866	258	1398	69.7008
	1399	1399	257.04	258.167	1399	69.5928
	1400	1400	257.208	258.333	1400	69.4847
	1401	1401	257.371	258.5	1401	69.3756
	1402	1402	257.543	258.667	1402	69.2664
	1403	1403	257.716	258.833	1403	69.1569
	1404	1404	257.885	259	1404	69.0472
	1405	1405	258.064	259.167	1405	68.9363
	1406	1406	258.233	259.333	1406	68.826
	1407	1407	258.398	259.5	1407	68.7158
	1408	1408	258.577	259.667	1408	68.6055
	1409	1409	258.752	259.833	1409	68.4948
	1410	1410	258.92	260	1410	68.3835
	1411	1411	259.082	260.167	1411	68.2718
	1412	1412	259.256	260.333	1412	68.1598
	1413	1413	259.417	260.5	1413	68.0467
	1414	1414	259.595	260.667	1414	67.9341
	1415	1415	259.761	260.833	1415	67.8213
	1416	1416	259.936	261	1416	67.7083
	1417	1417	260.107	261.167	1417	67.5942
	1418	1418	260.274	261.333	1418	67.4799
	1419	1419	260.451	261.5	1419	67.3656
	1420	1420	260.625	261.667	1420	67.2512
	1421	1421	260.795	261.833	1421	67.1354
	1422	1422	260.966	262	1422	67.0202
	1423	1423	261.133	262.167	1423	66.905
	1424	1424	261.308	262.333	1424	66.7898
	1425	1425	261.465	262.5	1425	66.675
	1426	1426	261.642	262.667	1426	66.5588
	1427	1427	261.817	262.833	1427	66.4424
	1428	1428	261.981	263	1428	66.3258
	1429	1429	262.148	263.167	1429	66.209
	1430	1430	262.315	263.333	1430	66.0918
	1431	1431	262.493	263.5	1431	65.9744
	1432	1432	262.665	263.667	1432	65.8566
	1433	1433	262.832	263.833	1433	65.738
	1434	1434	262.997	264	1434	65.6187
	1435	1435	263.168	264.167	1435	65.4995
	1436	1436	263.343	264.333	1436	65.3804
	1437	1437	263.507	264.5	1437	65.2611
	1438	1438	263.677	264.667	1438	65.1409
	1439	1439	263.852	264.833	1439	65.0209
	1440	1440	264.014	265	1440	64.9005
	1441	1441	264.195	265.167	1441	64.7799
	1442	1442	264.362	265.333	1442	64.6585
	1443	1443	264.529	265.5	1443	64.5372
	1444	1444	264.704	265.667	1444	64.4157
	1445	1445	264.874	265.833	1445	64.2942
	1446	1446	265.045	266	1446	64.1717
	1447	1447	265.224	266.167	1447	64.0494
	1448	1448	265.38	266.333	1448	63.9267
	1449	1449	265.55	266.5	1449	63.8039
	1450	1450	265.728	266.667	1450	63.6805
	1451	1451	265.901	266.833	1451	63.5572
	1452	1452	266.067	267	1452	63.4339
	1453	1453	266.234	267.167	1453	63.3105
	1454	1454	266.402	267.333	1454	63.1865
	1455	1455	266.577	267.5	1455	63.0624
	1456	1456	266.745	267.667	1456	62.9378
	1457	1457	266.915	267.833	1457	62.8129
	1458	1458	267.089	268	1458	62.6871
	1459	1459	267.251	268.167	1459	62.5615
	1460	1460	267.42	268.333	1460	62.4358
	1461	1461	267.588	268.5	1461	62.3101
	1462	1462	267.757	268.667	1462	62.1834
	1463	1463	267.935	268.833	1463	62.0567
	1464	1464	268.101	269	1464	61.9296
	1465	1465	268.271	269.167	1465	61.8024
	1466	1466	268.439	269.333	1466	61.6743
	1467	1467	268.602	269.5	1467	61.5465
	1468	1468	268.773	269.667	1468	61.4186
	1469	1469	268.948	269.833	1469	61.2907
	1470	1470	269.12	270	1470	61.162
	1471	1471	269.286	270.167	1471	61.0332
	1472	1472	269.457	270.333	1472	60.904
	1473	1473	269.627	270.5	1473	60.7747
	1474	1474	269.803	270.667	1474	60.6446
	1475	1475	269.98	270.833	1475	60.5148
	1476	1476	270.142	271	1476	60.3849
	1477	1477	270.31	271.167	1477	60.2548
	1478	1478	270.476	271.333	1478	60.1238
	1479	1479	270.64	271.5	1479	59.9928
	1480	1480	270.816	271.667	1480	59.8618
	1481	1481	270.989	271.833	1481	59.7308
	1482	1482	271.161	272	1482	59.5991
	1483	1483	271.324	272.167	1483	59.4677
	1484	1484	271.501	272.333	1484	59.3362
	1485	1485	271.672	272.5	1485	59.2046
	1486	1486	271.838	272.667	1486	59.0728
	1487	1487	272.009	272.833	1487	58.9403
	1488	1488	272.18	273	1488	58.8073
	1489	1489	272.347	273.167	1489	58.6739
	1490	1490	272.516	273.333	1490	58.5393
	1491	1491	272.685	273.5	1491	58.4051
	1492	1492	272.859	273.667	1492	58.2708
	1493	1493	273.027	273.833	1493	58.1363
	1494	1494	273.199	274	1494	58.001
	1495	1495	273.367	274.167	1495	57.8656
	1496	1496	273.533	274.333	1496	57.73
	1497	1497	273.705	274.5	1497	57.5941
	1498	1498	273.883	274.667	1498	57.4574
	1499	1499	274.051	274.833	1499	57.321
	1500	1500	274.222	275	1500	57.1847
	1501	1501	274.394	275.167	1501	57.0484
	1502	1502	274.556	275.333	1502	56.9116
	1503	1503	274.733	275.5	1503	56.7745
	1504	1504	274.894	275.667	1504	56.6371
	1505	1505	275.066	275.833	1505	56.4996
	1506	1506	275.228	276	1506	56.3616
	1507	1507	275.407	276.167	1507	56.2231
	1508	1508	275.581	276.333	1508	56.0848
	1509	1509	275.752	276.5	1509	55.9466
	1510	1510	275.928	276.667	1510	55.8073
	1511	1511	276.096	276.833	1511	55.6688
	1512	1512	276.266	277	1512	55.5297
	1513	1513	276.44	277.167	1513	55.3901
	1514	1514	276.608	277.333	1514	55.2494
	1515	1515	276.773	277.5	1515	55.1089
	1516	1516	276.942	277.667	1516	54.9685
	1517	1517	277.101	277.833	1517	54.828
	1518	1518	277.278	278	1518	54.6875
	1519	1519	277.447	278.167	1519	54.5468
	1520	1520	277.62	278.333	1520	54.4057
	1521	1521	277.792	278.5	1521	54.2642
	1522	1522	277.963	278.667	1522	54.1222
	1523	1523	278.127	278.833	1523	53.9797
	1524	1524	278.295	279	1524	53.8372
	1525	1525	278.467	279.167	1525	53.6947
	1526	1526	278.64	279.333	1526	53.5521
	1527	1527	278.801	279.5	1527	53.4082
	1528	1528	278.976	279.667	1528	53.2644
	1529	1529	279.146	279.833	1529	53.1206
	1530	1530	279.318	280	1530	52.9766
	1531	1531	279.491	280.167	1531	52.8318
	1532	1532	279.659	280.333	1532	52.6875
	1533	1533	279.826	280.5	1533	52.5432
	1534	1534	279.994	280.667	1534	52.3989
	1535	1535	280.167	280.833	1535	52.2542
	1536	1536	280.335	281	1536	52.109
	1537	1537	280.498	281.167	1537	51.9635
	1538	1538	280.667	281.333	1538	51.8177
	1539	1539	280.837	281.5	1539	51.671
	1540	1540	281.008	281.667	1540	51.5248
	1541	1541	281.17	281.833	1541	51.3787
	1542	1542	281.352	282	1542	51.2325
	1543	1543	281.527	282.167	1543	51.086
	1544	1544	281.697	282.333	1544	50.9395
	1545	1545	281.858	282.5	1545	50.793
	1546	1546	282.031	282.667	1546	50.6464
	1547	1547	282.205	282.833	1547	50.4987
	1548	1548	282.362	283	1548	50.3509
	1549	1549	282.535	283.167	1549	50.2029
	1550	1550	282.705	283.333	1550	50.0548
	1551	1551	282.878	283.5	1551	49.9058
	1552	1552	283.045	283.667	1552	49.7575
	1553	1553	283.216	283.833	1553	49.6091
	1554	1554	283.386	284	1554	49.4605
	1555	1555	283.554	284.167	1555	49.3114
	1556	1556	283.723	284.333	1556	49.1617
	1557	1557	283.886	284.5	1557	49.0118
	1558	1558	284.059	284.667	1558	48.8617
	1559	1559	284.235	284.833	1559	48.7103
	1560	1560	284.396	285	1560	48.5596
	1561	1561	284.567	285.167	1561	48.4086
	1562	1562	284.734	285.333	1562	48.2574
	1563	1563	284.907	285.5	1563	48.1061
	1564	1564	285.078	285.667	1564	47.9546
	1565	1565	285.25	285.833	1565	47.803
	1566	1566	285.42	286	1566	47.6513
	1567	1567	285.591	286.167	1567	47.4992
	1568	1568	285.761	286.333	1568	47.3475
	1569	1569	285.931	286.5	1569	47.1957
	1570	1570	286.099	286.667	1570	47.0437
	1571	1571	286.259	286.833	1571	46.891
	1572	1572	286.434	287	1572	46.738
	1573	1573	286.598	287.167	1573	46.5848
	1574	1574	286.768	287.333	1574	46.4316
	1575	1575	286.945	287.5	1575	46.2777
	1576	1576	287.111	287.667	1576	46.1237
	1577	1577	287.287	287.833	1577	45.9698
	1578	1578	287.449	288	1578	45.8157
	1579	1579	287.623	288.167	1579	45.661
	1580	1580	287.795	288.333	1580	45.5065
	1581	1581	287.969	288.5	1581	45.3519
	1582	1582	288.131	288.667	1582	45.1976
	1583	1583	288.301	288.833	1583	45.0432
	1584	1584	288.476	289	1584	44.8891
	1585	1585	288.636	289.167	1585	44.7348
	1586	1586	288.807	289.333	1586	44.5802
	1587	1587	288.98	289.5	1587	44.4256
	1588	1588	289.147	289.667	1588	44.2709
	1589	1589	289.317	289.833	1589	44.1157
	1590	1590	289.49	290	1590	43.9598
	1591	1591	289.657	290.167	1591	43.8035
	1592	1592	289.827	290.333	1592	43.646
	1593	1593	289.994	290.5	1593	43.489
	1594	1594	290.173	290.667	1594	43.3321
	1595	1595	290.336	290.833	1595	43.1752
	1596	1596	290.502	291	1596	43.0174
	1597	1597	290.674	291.167	1597	42.8596
	1598	1598	290.842	291.333	1598	42.7017
	1599	1599	291.007	291.5	1599	42.5437
	1600	1600	291.173	291.667	1600	42.3854
	1601	1601	291.349	291.833	1601	42.2274
	1602	1602	291.514	292	1602	42.0695
	1603	1603	291.687	292.167	1603	41.9118
	1604	1604	291.861	292.333	1604	41.7541
	1605	1605	292.028	292.5	1605	41.5957
	1606	1606	292.202	292.667	1606	41.437
	1607	1607	292.366	292.833	1607	41.2782
	1608	1608	292.527	293	1608	41.1188
	1609	1609	292.707	293.167	1609	40.9598
	1610	1610	292.877	293.333	1610	40.8009
	1611	1611	293.043	293.5	1611	40.6421
	1612	1612	293.209	293.667	1612	40.4833
	1613	1613	293.38	293.833	1613	40.3239
	1614	1614	293.548	294	1614	40.1642
	1615	1615	293.722	294.167	1615	40.0045
	1616	1616	293.889	294.333	1616	39.8442
	1617	1617	294.064	294.5	1617	39.6842
	1618	1618	294.229	294.667	1618	39.5243
	1619	1619	294.402	294.833	1619	39.3644
	1620	1620	294.571	295	1620	39.204
	1621	1621	294.738	295.167	1621	39.0432
	1622	1622	294.906	295.333	1622	38.8824
	1623	1623	295.076	295.5	1623	38.7216
	1624	1624	295.247	295.667	1624	38.5601
	1625	1625	295.413	295.833	1625	38.399
	1626	1626	295.583	296	1626	38.2381
	1627	1627	295.753	296.167	1627	38.0773
	1628	1628	295.923	296.333	1628	37.9168
	1629	1629	296.087	296.5	1629	37.756
	1630	1630	296.256	296.667	1630	37.5952
	1631	1631	296.43	296.833	1631	37.4341
	1632	1632	296.594	297	1632	37.2724
	1633	1633	296.769	297.167	1633	37.1109
	1634	1634	296.935	297.333	1634	36.9493
	1635	1635	297.107	297.5	1635	36.7877
	1636	1636	297.273	297.667	1636	36.6254
	1637	1637	297.446	297.833	1637	36.4636
	1638	1638	297.618	298	1638	36.3018
	1639	1639	297.788	298.167	1639	36.1399
	1640	1640	297.961	298.333	1640	35.9777
	1641	1641	298.134	298.5	1641	35.8152
	1642	1642	298.288	298.667	1642	35.6526
	1643	1643	298.461	298.833	1643	35.49
	1644	1644	298.631	299	1644	35.3268
	1645	1645	298.801	299.167	1645	35.1641
	1646	1646	298.964	299.333	1646	35.0015
	1647	1647	299.139	299.5	1647	34.839
	1648	1648	299.316	299.667	1648	34.6769
	1649	1649	299.483	299.833	1649	34.5141
	1650	1650	299.652	300	1650	34.3511
	1651	1651	299.818	300.167	1651	34.1879
	1652	1652	299.984	300.333	1652	34.0242
	1653	1653	300.15	300.5	1653	33.8606
	1654	1654	300.324	300.667	1654	33.6971
	1655	1655	300.488	300.833	1655	33.5336
	1656	1656	300.658	301	1656	33.3694
	1657	1657	300.826	301.167	1657	33.2054
	1658	1658	300.994	301.333	1658	33.0416
	1659	1659	301.167	301.5	1659	32.8778
	1660	1660	301.338	301.667	1660	32.7139
	1661	1661	301.507	301.833	1661	32.5504
	1662	1662	301.684	302	1662	32.387
	1663	1663	301.845	302.167	1663	32.2237
	1664	1664	302.015	302.333	1664	32.061
	1665	1665	302.181	302.5	1665	31.8978
	1666	1666	302.353	302.667	1666	31.7343
	1667	1667	302.519	302.833	1667	31.5705
	1668	1668	302.682	303	1668	31.4067
	1669	1669	302.855	303.167	1669	31.2425
	1670	1670	303.025	303.333	1670	31.0786
	1671	1671	303.195	303.5	1671	30.9148
	1672	1672	303.371	303.667	1672	30.7513
	1673	1673	303.536	303.833	1673	30.5881
	1674	1674	303.706	304	1674	30.4245
	1675	1675	303.869	304.167	1675	30.2606
	1676	1676	304.037	304.333	1676	30.0965
	1677	1677	304.209	304.5	1677	29.9325
	1678	1678	304.378	304.667	1678	29.7686
	1679	1679	304.546	304.833	1679	29.6047
	1680	1680	304.725	305	1680	29.441
	1681	1681	304.894	305.167	1681	29.2775
	1682	1682	305.059	305.333	1682	29.1142
	1683	1683	305.222	305.5	1683	28.9508
	1684	1684	305.394	305.667	1684	28.7873
	1685	1685	305.572	305.833	1685	28.6238
	1686	1686	305.732	306	1686	28.4601
	1687	1687	305.901	306.167	1687	28.2964
	1688	1688	306.074	306.333	1688	28.1327
	1689	1689	306.243	306.5	1689	27.9687
	1690	1690	306.407	306.667	1690	27.805
	1691	1691	306.581	306.833	1691	27.6417
	1692	1692	306.748	307	1692	27.4785
	1693	1693	306.917	307.167	1693	27.3159
	1694	1694	307.087	307.333	1694	27.1526
	1695	1695	307.26	307.5	1695	26.9889
	1696	1696	307.426	307.667	1696	26.8253
	1697	1697	307.591	307.833	1697	26.6616
	1698	1698	307.759	308	1698	26.4981
	1699	1699	307.93	308.167	1699	26.3349
	1700	1700	308.101	308.333	1700	26.1717
	1701	1701	308.266	308.5	1701	26.0089
	1702	1702	308.438	308.667	1702	25.8461
	1703	1703	308.61	308.833	1703	25.683
	1704	1704	308.772	309	1704	25.5197
	1705	1705	308.94	309.167	1705	25.3566
	1706	1706	309.119	309.333	1706	25.1934
	1707	1707	309.294	309.5	1707	25.0306
	1708	1708	309.455	309.667	1708	24.8678
	1709	1709	309.623	309.833	1709	24.7053
	1710	1710	309.793	310	1710	24.5432
	1711	1711	309.955	310.167	1711	24.3809
	1712	1712	310.125	310.333	1712	24.2184
	1713	1713	310.298	310.5	1713	24.0566
	1714	1714	310.469	310.667	1714	23.8945
	1715	1715	310.64	310.833	1715	23.7326
	1716	1716	310.806	311	1716	23.571
	1717	1717	310.973	311.167	1717	23.4093
	1718	1718	311.145	311.333	1718	23.2479
	1719	1719	311.319	311.5	1719	23.0867
	1720	1720	311.488	311.667	1720	22.9255
	1721	1721	311.656	311.833	1721	22.7647
	1722	1722	311.824	312	1722	22.6037
	1723	1723	311.992	312.167	1723	22.4428
	1724	1724	312.161	312.333	1724	22.2821
	1725	1725	312.328	312.5	1725	22.1216
	1726	1726	312.496	312.667	1726	21.9614
	1727	1727	312.666	312.833	1727	21.8013
	1728	1728	312.834	313	1728	21.6413
	1729	1729	313.002	313.167	1729	21.4823
	1730	1730	313.18	313.333	1730	21.3227
	1731	1731	313.344	313.5	1731	21.1629
	1732	1732	313.512	313.667	1732	21.0032
	1733	1733	313.678	313.833	1733	20.8438
	1734	1734	313.854	314	1734	20.6847
	1735	1735	314.022	314.167	1735	20.5259
	1736	1736	314.191	314.333	1736	20.3674
	1737	1737	314.359	314.5	1737	20.2098
	1738	1738	314.53	314.667	1738	20.0525
	1739	1739	314.695	314.833	1739	19.8951
	1740	1740	314.871	315	1740	19.7376
	1741	1741	315.033	315.167	1741	19.5804
	1742	1742	315.202	315.333	1742	19.4229
	1743	1743	315.37	315.5	1743	19.2656
	1744	1744	315.555	315.667	1744	19.1085
	1745	1745	315.71	315.833	1745	18.9521
	1746	1746	315.884	316	1746	18.7957
	1747	1747	316.045	316.167	1747	18.6397
	1748	1748	316.226	316.333	1748	18.4837
	1749	1749	316.394	316.5	1749	18.3276
	1750	1750	316.564	316.667	1750	18.1725
	1751	1751	316.727	316.833	1751	18.0172
	1752	1752	316.895	317	1752	17.862
	1753	1753	317.065	317.167	1753	17.707
	1754	1754	317.232	317.333	1754	17.5527
	1755	1755	317.397	317.5	1755	17.3988
	1756	1756	317.574	317.667	1756	17.2454
	1757	1757	317.744	317.833	1757	17.0921
	1758	1758	317.912	318	1758	16.9404
	1759	1759	318.079	318.167	1759	16.7878
	1760	1760	318.252	318.333	1760	16.6352
	1761	1761	318.416	318.5	1761	16.4827
	1762	1762	318.588	318.667	1762	16.3306
	1763	1763	318.759	318.833	1763	16.1789
	1764	1764	318.921	319	1764	16.0274
	1765	1765	319.093	319.167	1765	15.876
	1766	1766	319.27	319.333	1766	15.7253
	1767	1767	319.43	319.5	1767	15.5747
	1768	1768	319.598	319.667	1768	15.4243
	1769	1769	319.773	319.833	1769	15.2742
	1770	1770	319.945	320	1770	15.1253
	1771	1771	320.11	320.167	1771	14.9766
	1772	1772	320.285	320.333	1772	14.8284
	1773	1773	320.451	320.5	1773	14.6804
	1774	1774	320.624	320.667	1774	14.5346
	1775	1775	320.797	320.833	1775	14.3882
	1776	1776	320.956	321	1776	14.2418
	1777	1777	321.126	321.167	1777	14.0954
	1778	1778	321.291	321.333	1778	13.9502
	1779	1779	321.463	321.5	1779	13.8049
	1780	1780	321.64	321.667	1780	13.66
	1781	1781	321.805	321.833	1781	13.5153
	1782	1782	321.975	322	1782	13.3721
	1783	1783	322.142	322.167	1783	13.2291
	1784	1784	322.306	322.333	1784	13.0864
	1785	1785	322.478	322.5	1785	12.9438
	1786	1786	322.643	322.667	1786	12.8026
	1787	1787	322.816	322.833	1787	12.661
	1788	1788	322.985	323	1788	12.5198
	1789	1789	323.151	323.167	1789	12.3788
	1790	1790	323.318	323.333	1790	12.239
	1791	1791	323.489	323.5	1791	12.0996
	1792	1792	323.668	323.667	1792	11.9608
	1793	1793	323.833	323.833	1793	11.8223
	1794	1794	323.995	324	1794	11.6858
	1795	1795	324.171	324.167	1795	11.5484
	1796	1796	324.339	324.333	1796	11.411
	1797	1797	324.507	324.5	1797	11.274
	1798	1798	324.681	324.667	1798	11.1382
	1799	1799	324.855	324.833	1799	11.0027
	1800	1800	325.014	325	1800	10.8681
	1801	1801	325.181	325.167	1801	10.734
	1802	1802	325.363	325.333	1802	10.6023
	1803	1803	325.524	325.5	1803	10.4701
	1804	1804	325.691	325.667	1804	10.338
	1805	1805	325.857	325.833	1805	10.2061
	1806	1806	326.026	326	1806	10.0764
	1807	1807	326.197	326.167	1807	9.9464
	1808	1808	326.37	326.333	1808	9.81684
	1809	1809	326.539	326.5	1809	9.68779
	1810	1810	326.705	326.667	1810	9.56107
	1811	1811	326.862	326.833	1811	9.43408
	1812	1812	327.039	327	1812	9.30731
	1813	1813	327.206	327.167	1813	9.18063
	1814	1814	327.379	327.333	1814	9.0562
	1815	1815	327.553	327.5	1815	8.93151
	1816	1816	327.715	327.667	1816	8.80731
	1817	1817	327.888	327.833	1817	8.68381
	1818	1818	328.056	328	1818	8.56067
	1819	1819	328.224	328.167	1819	8.44053
	1820	1820	328.399	328.333	1820	8.32024
	1821	1821	328.562	328.5	1821	8.20049
	1822	1822	328.736	328.667	1822	8.08125
	1823	1823	328.901	328.833	1823	7.96408
	1824	1824	329.073	329	1824	7.84649
	1825	1825	329.239	329.167	1825	7.72952
	1826	1826	329.414	329.333	1826	7.6126
	1827	1827	329.587	329.5	1827	7.49865
	1828	1828	329.757	329.667	1828	7.38466
	1829	1829	329.926	329.833	1829	7.27149
	1830	1830	330.084	330	1830	7.15899
	1831	1831	330.257	330.167	1831	7.05006
	1832	1832	330.424	330.333	1832	6.94009
	1833	1833	330.6	330.5	1833	6.83032
	1834	1834	330.757	330.667	1834	6.721
	1835	1835	330.931	330.833	1835	6.61443
	1836	1836	331.096	331	1836	6.50765
	1837	1837	331.267	331.167	1837	6.40155
	1838	1838	331.433	331.333	1838	6.29607
	1839	1839	331.609	331.5	1839	6.19368
	1840	1840	331.778	331.667	1840	6.09103
	1841	1841	331.941	331.833	1841	5.98914
	1842	1842	332.116	332	1842	5.88794
	1843	1843	332.29	332.167	1843	5.79005
	1844	1844	332.459	332.333	1844	5.6913
	1845	1845	332.624	332.5	1845	5.59311
	1846	1846	332.787	332.667	1846	5.49566
	1847	1847	332.959	332.833	1847	5.40101
	1848	1848	333.131	333	1848	5.30605
	1849	1849	333.297	333.167	1849	5.21185
	1850	1850	333.458	333.333	1850	5.11841
	1851	1851	333.635	333.5	1851	5.02809
	1852	1852	333.81	333.667	1852	4.93728
	1853	1853	333.974	333.833	1853	4.84738
	1854	1854	334.139	334	1854	4.7583
	1855	1855	334.316	334.167	1855	4.67287
	1856	1856	334.484	334.333	1856	4.58722
	1857	1857	334.654	334.5	1857	4.50251
	1858	1858	334.823	334.667	1858	4.41863
	1859	1859	334.98	334.833	1859	4.33932
	1860	1860	335.156	335	1860	4.25927
	1861	1861	335.324	335.167	1861	4.17986
	1862	1862	335.496	335.333	1862	4.10102
	1863	1863	335.67	335.5	1863	4.0257
	1864	1864	335.842	335.667	1864	3.94987
	1865	1865	336.004	335.833	1865	3.87502
	1866	1866	336.166	336	1866	3.80102
	1867	1867	336.342	336.167	1867	3.7306
	1868	1868	336.513	336.333	1868	3.66031
	1869	1869	336.674	336.5	1869	3.59111
	1870	1870	336.845	336.667	1870	3.52273
	1871	1871	337.019	336.833	1871	3.4588
	1872	1872	337.19	337	1872	3.39393
	1873	1873	337.347	337.167	1873	3.33001
	1874	1874	337.515	337.333	1874	3.26697
	1875	1875	337.693	337.5	1875	3.20793
	1876	1876	337.858	337.667	1876	3.14885
	1877	1877	338.028	337.833	1877	3.09088
	1878	1878	338.198	338	1878	3.03382
	1879	1879	338.372	338.167	1879	2.98202
	1880	1880	338.53	338.333	1880	2.92937
	1881	1881	338.701	338.5	1881	2.87733
	1882	1882	338.88	338.667	1882	2.82576
	1883	1883	339.039	338.833	1883	2.7783
	1884	1884	339.212	339	1884	2.73011
	1885	1885	339.381	339.167	1885	2.68269
	1886	1886	339.554	339.333	1886	2.63606
	1887	1887	339.726	339.5	1887	2.5932
	1888	1888	339.895	339.667	1888	2.55029
	1889	1889	340.063	339.833	1889	2.50826
	1890	1890	340.231	340	1890	2.46685
	1891	1891	340.404	340.167	1891	2.42944
	1892	1892	340.567	340.333	1892	2.39107
	1893	1893	340.738	340.5	1893	2.35343
	1894	1894	340.91	340.667	1894	2.31656
	1895	1895	341.073	340.833	1895	2.2828
	1896	1896	341.246	341	1896	2.24892
	1897	1897	341.419	341.167	1897	2.21586
	1898	1898	341.586	341.333	1898	2.18346
	1899	1899	341.751	341.5	1899	2.15408
	1900	1900	341.926	341.667	1900	2.12436
	1901	1901	342.096	341.833	1901	2.09482
	1902	1902	342.26	342	1902	2.06578
	1903	1903	342.431	342.167	1903	2.03954
	1904	1904	342.596	342.333	1904	2.01241
	1905	1905	342.764	342.5	1905	1.98637
	1906	1906	342.928	342.667	1906	1.96102
	1907	1907	343.098	342.833	1907	1.93828
	1908	1908	343.267	343	1908	1.91523
	1909	1909	343.44	343.167	1909	1.89212
	1910	1910	343.611	343.333	1910	1.86963
	1911	1911	343.78	343.5	1911	1.84769
	1912	1912	343.948	343.667	1912	1.82755
	1913	1913	344.112	343.833	1913	1.80744
	1914	1914	344.278	344	1914	1.78798
	1915	1915	344.448	344.167	1915	1.769
	1916	1916	344.614	344.333	1916	1.75248
	1917	1917	344.783	344.5	1917	1.73541
	1918	1918	344.961	344.667	1918	1.7185
	1919	1919	345.126	344.833	1919	1.70168
	1920	1920	345.291	345	1920	1.68624
	1921	1921	345.46	345.167	1921	1.67052
	1922	1922	345.621	345.333	1922	1.65512
	1923	1923	345.8	345.5	1923	1.6401
	1924	1924	345.962	345.667	1924	1.62644
	1925	1925	346.13	345.833	1925	1.61306
	1926	1926	346.301	346	1926	1.60019
	1927	1927	346.469	346.167	1927	1.58766
	1928	1928	346.638	346.333	1928	1.57674
	1929	1929	346.811	346.5	1929	1.56488
	1930	1930	346.974	346.667	1930	1.55316
	1931	1931	347.136	346.833	1931	1.54164
	1932	1932	347.315	347	1932	1.53059
	1933	1933	347.474	347.167	1933	1.51999
	1934	1934	347.64	347.333	1934	1.50985
	1935	1935	347.81	347.5	1935	1.49997
	1936	1936	347.981	347.667	1936	1.49139
	1937	1937	348.144	347.833	1937	1.48202
	1938	1938	348.316	348	1938	1.47255
	1939	1939	348.486	348.167	1939	1.46324
	1940	1940	348.655	348.333	1940	1.45454
	1941	1941	348.823	348.5	1941	1.44608
	1942	1942	348.985	348.667	1942	1.43801
	1943	1943	349.16	348.833	1943	1.4302
	1944	1944	349.321	349	1944	1.4236
	1945	1945	349.492	349.167	1945	1.41681
	1946	1946	349.661	349.333	1946	1.41022
	1947	1947	349.829	349.5	1947	1.40376
	1948	1948	349.992	349.667	1948	1.39759
	1949	1949	350.168	349.833	1949	1.39106
	1950	1950	350.329	350	1950	1.38462
	1951	1951	350.501	350.167	1951	1.37829
	1952	1952	350.669	350.333	1952	1.37203
	1953	1953	350.836	350.5	1953	1.36621
	1954	1954	351.002	350.667	1954	1.36082
	1955	1955	351.161	350.833	1955	1.3556
	1956	1956	351.329	351	1956	1.35167
	1957	1957	351.506	351.167	1957	1.3474
	1958	1958	351.669	351.333	1958	1.34293
	1959	1959	351.842	351.5	1959	1.33834
	1960	1960	352.011	351.667	1960	1.33384
	1961	1961	352.183	351.833	1961	1.32916
	1962	1962	352.348	352	1962	1.32471
	1963	1963	352.511	352.167	1963	1.32041
	1964	1964	352.678	352.333	1964	1.31583
	1965	1965	352.845	352.5	1965	1.31179
	1966	1966	353.015	352.667	1966	1.30806
	1967	1967	353.178	352.833	1967	1.30444
	1968	1968	353.348	353	1968	1.30111
	1969	1969	353.514	353.167	1969	1.29816
	1970	1970	353.682	353.333	1970	1.29468
	1971	1971	353.842	353.5	1971	1.29097
	1972	1972	354.016	353.667	1972	1.2874
	1973	1973	354.188	353.833	1973	1.28347
	1974	1974	354.353	354	1974	1.28026
	1975	1975	354.523	354.167	1975	1.2774
	1976	1976	354.693	354.333	1976	1.2746
	1977	1977	354.854	354.5	1977	1.2722
	1978	1978	355.02	354.667	1978	1.26973
	1979	1979	355.18	354.833	1979	1.2672
	1980	1980	355.356	355	1980	1.26458
	1981	1981	355.523	355.167	1981	1.26169
	1982	1982	355.688	355.333	1982	1.25866
	1983	1983	355.861	355.5	1983	1.25573
	1984	1984	356.022	355.667	1984	1.25294
	1985	1985	356.191	355.833	1985	1.25022
	1986	1986	356.358	356	1986	1.24805
	1987	1987	356.527	356.167	1987	1.24613
	1988	1988	356.698	356.333	1988	1.24419
	1989	1989	356.866	356.5	1989	1.2424
	1990	1990	357.029	356.667	1990	1.23987
[truncated: 4,964 more rows]

## Sheet: B5
Title	20.08.2018	12:30:00
________________________________________________________________________________
Title
Evaluation	Categories:
Curve	Name:
	!5%-25..600C	10K	N2	50ML	AL100	BLANK	20.08.2018	12:30:09
Curve	Values:
	Index	t	Ts	Tr	x	value	y	value
	[s]	[°C]	[°C]	[s]	[%]
	0	0	24.5965	25	0	99.9996
	1	1	24.5917	25.1667	1	99.9993
	2	2	24.6213	25.3333	2	99.9982
	3	3	24.6827	25.5	3	100.008
	4	4	24.7598	25.6667	4	99.952
	5	5	24.8379	25.8333	5	99.9606
	6	6	24.9385	26	6	99.9478
	7	7	25.0403	26.1667	7	99.9135
	8	8	25.1425	26.3333	8	99.9166
	9	9	25.2542	26.5	9	99.9064
	10	10	25.3664	26.6667	10	99.9005
	11	11	25.4846	26.8333	11	99.8952
	12	12	25.6278	27	12	99.904
	13	13	25.763	27.1667	13	99.8835
	14	14	25.8857	27.3333	14	99.8807
	15	15	26.0187	27.5	15	99.8852
	16	16	26.1545	27.6667	16	99.8957
	17	17	26.2967	27.8333	17	99.8884
	18	18	26.4252	28	18	99.8876
	19	19	26.5763	28.1667	19	99.8875
	20	20	26.7009	28.3333	20	99.8959
	21	21	26.8485	28.5	21	99.8928
	22	22	26.9682	28.6667	22	99.8928
	23	23	27.1067	28.8333	23	99.8931
	24	24	27.2533	29	24	99.898
	25	25	27.3956	29.1667	25	99.8965
	26	26	27.5267	29.3333	26	99.8968
	27	27	27.6575	29.5	27	99.8972
	28	28	27.798	29.6667	28	99.9001
	29	29	27.9339	29.8333	29	99.8998
	30	30	28.076	30	30	99.9003
	31	31	28.226	30.1667	31	99.901
	32	32	28.3785	30.3333	32	99.9032
	33	33	28.4993	30.5	33	99.9035
	34	34	28.6426	30.6667	34	99.9045
	35	35	28.7765	30.8333	35	99.9054
	36	36	28.9137	31	36	99.9068
	37	37	29.0568	31.1667	37	99.9074
	38	38	29.1915	31.3333	38	99.9081
	39	39	29.3258	31.5	39	99.9087
	40	40	29.4747	31.6667	40	99.9099
	41	41	29.6049	31.8333	41	99.9104
	42	42	29.7413	32	42	99.911
	43	43	29.8834	32.1667	43	99.9116
	44	44	30.0124	32.3333	44	99.9126
	45	45	30.1462	32.5	45	99.9129
	46	46	30.2896	32.6667	46	99.9133
	47	47	30.4207	32.8333	47	99.9137
	48	48	30.5496	33	48	99.9138
	49	49	30.6915	33.1667	49	99.9141
	50	50	30.825	33.3333	50	99.914
	51	51	30.9726	33.5	51	99.9138
	52	52	31.1056	33.6667	52	99.9134
	53	53	31.2407	33.8333	53	99.9126
	54	54	31.3821	34	54	99.9121
	55	55	31.5101	34.1667	55	99.9116
	56	56	31.6344	34.3333	56	99.9109
	57	57	31.7789	34.5	57	99.9103
	58	58	31.9011	34.6667	58	99.9097
	59	59	32.0462	34.8333	59	99.909
	60	60	32.184	35	60	99.9081
	61	61	32.3132	35.1667	61	99.9073
	62	62	32.4437	35.3333	62	99.9065
	63	63	32.5767	35.5	63	99.9058
	64	64	32.7193	35.6667	64	99.9048
	65	65	32.8607	35.8333	65	99.904
	66	66	32.9938	36	66	99.9032
	67	67	33.13	36.1667	67	99.9023
	68	68	33.2648	36.3333	68	99.9016
	69	69	33.4018	36.5	69	99.9009
	70	70	33.5288	36.6667	70	99.9002
	71	71	33.6667	36.8333	71	99.8994
	72	72	33.8039	37	72	99.8987
	73	73	33.9279	37.1667	73	99.8979
	74	74	34.062	37.3333	74	99.8972
	75	75	34.2126	37.5	75	99.8965
	76	76	34.3386	37.6667	76	99.8956
	77	77	34.4686	37.8333	77	99.8948
	78	78	34.6196	38	78	99.8943
	79	79	34.7591	38.1667	79	99.8936
	80	80	34.8732	38.3333	80	99.8927
	81	81	35.0155	38.5	81	99.892
	82	82	35.143	38.6667	82	99.8912
	83	83	35.2852	38.8333	83	99.8904
	84	84	35.4065	39	84	99.8895
	85	85	35.5671	39.1667	85	99.8885
	86	86	35.6955	39.3333	86	99.8874
	87	87	35.8346	39.5	87	99.8865
	88	88	35.9678	39.6667	88	99.8857
	89	89	36.1015	39.8333	89	99.885
	90	90	36.2386	40	90	99.8845
	91	91	36.3863	40.1667	91	99.884
	92	92	36.5388	40.3333	92	99.8838
	93	93	36.6732	40.5	93	99.8835
	94	94	36.8084	40.6667	94	99.8832
	95	95	36.9325	40.8333	95	99.883
	96	96	37.0774	41	96	99.8828
	97	97	37.2175	41.1667	97	99.8828
	98	98	37.3676	41.3333	98	99.8826
	99	99	37.4953	41.5	99	99.8824
	100	100	37.6373	41.6667	100	99.8821
	101	101	37.7728	41.8333	101	99.882
	102	102	37.9138	42	102	99.8818
	103	103	38.0635	42.1667	103	99.8817
	104	104	38.1892	42.3333	104	99.8817
	105	105	38.3298	42.5	105	99.8817
	106	106	38.4749	42.6667	106	99.8818
	107	107	38.6163	42.8333	107	99.8817
	108	108	38.7549	43	108	99.8816
	109	109	38.8882	43.1667	109	99.8815
	110	110	39.0302	43.3333	110	99.8812
	111	111	39.1676	43.5	111	99.8811
	112	112	39.3163	43.6667	112	99.8809
	113	113	39.461	43.8333	113	99.8808
	114	114	39.5937	44	114	99.8807
	115	115	39.7272	44.1667	115	99.8806
	116	116	39.8841	44.3333	116	99.8807
	117	117	40.0192	44.5	117	99.8807
	118	118	40.1689	44.6667	118	99.8808
	119	119	40.3047	44.8333	119	99.881
	120	120	40.445	45	120	99.8811
	121	121	40.5829	45.1667	121	99.8813
	122	122	40.7314	45.3333	122	99.8814
	123	123	40.8839	45.5	123	99.8814
	124	124	41.0218	45.6667	124	99.8815
	125	125	41.164	45.8333	125	99.8818
	126	126	41.3032	46	126	99.882
	127	127	41.433	46.1667	127	99.8823
	128	128	41.5786	46.3333	128	99.8824
	129	129	41.728	46.5	129	99.8827
	130	130	41.875	46.6667	130	99.8831
	131	131	42.0078	46.8333	131	99.8834
	132	132	42.1494	47	132	99.8836
	133	133	42.2927	47.1667	133	99.8837
	134	134	42.4452	47.3333	134	99.8839
	135	135	42.5987	47.5	135	99.884
	136	136	42.7373	47.6667	136	99.884
	137	137	42.8759	47.8333	137	99.884
	138	138	43.0234	48	138	99.8841
	139	139	43.1599	48.1667	139	99.8843
	140	140	43.3085	48.3333	140	99.8844
	141	141	43.4557	48.5	141	99.8847
	142	142	43.5964	48.6667	142	99.885
	143	143	43.7432	48.8333	143	99.8853
	144	144	43.8979	49	144	99.8856
	145	145	44.0402	49.1667	145	99.8861
	146	146	44.1842	49.3333	146	99.8864
	147	147	44.3326	49.5	147	99.8867
	148	148	44.4783	49.6667	148	99.8872
	149	149	44.6275	49.8333	149	99.8879
	150	150	44.7743	50	150	99.8884
	151	151	44.9202	50.1667	151	99.8889
	152	152	45.0656	50.3333	152	99.8893
	153	153	45.2085	50.5	153	99.8896
	154	154	45.3626	50.6667	154	99.8901
	155	155	45.5093	50.8333	155	99.8903
	156	156	45.6491	51	156	99.8906
	157	157	45.793	51.1667	157	99.8907
	158	158	45.9454	51.3333	158	99.8905
	159	159	46.1166	51.5	159	99.8905
	160	160	46.2618	51.6667	160	99.8906
	161	161	46.3998	51.8333	161	99.8905
	162	162	46.546	52	162	99.8903
	163	163	46.6913	52.1667	163	99.8903
	164	164	46.8452	52.3333	164	99.8903
	165	165	46.996	52.5	165	99.8905
	166	166	47.1487	52.6667	166	99.891
	167	167	47.2855	52.8333	167	99.8913
	168	168	47.4385	53	168	99.8916
	169	169	47.5987	53.1667	169	99.892
	170	170	47.7388	53.3333	170	99.8922
	171	171	47.8866	53.5	171	99.8923
	172	172	48.0448	53.6667	172	99.8926
	173	173	48.1974	53.8333	173	99.8928
	174	174	48.3495	54	174	99.8928
	175	175	48.4917	54.1667	175	99.8932
	176	176	48.6491	54.3333	176	99.8935
	177	177	48.8008	54.5	177	99.8937
	178	178	48.9423	54.6667	178	99.8941
	179	179	49.0898	54.8333	179	99.8943
	180	180	49.2482	55	180	99.8946
	181	181	49.3938	55.1667	181	99.8948
	182	182	49.5444	55.3333	182	99.8952
	183	183	49.7076	55.5	183	99.8955
	184	184	49.8612	55.6667	184	99.8957
	185	185	50.0068	55.8333	185	99.896
	186	186	50.1581	56	186	99.8964
	187	187	50.3135	56.1667	187	99.8967
	188	188	50.4677	56.3333	188	99.8969
	189	189	50.6195	56.5	189	99.8973
	190	190	50.7712	56.6667	190	99.8976
	191	191	50.916	56.8333	191	99.8976
	192	192	51.0645	57	192	99.8978
	193	193	51.2235	57.1667	193	99.8981
	194	194	51.3908	57.3333	194	99.898
	195	195	51.5334	57.5	195	99.8981
	196	196	51.6924	57.6667	196	99.8983
	197	197	51.8386	57.8333	197	99.8983
	198	198	51.991	58	198	99.8985
	199	199	52.1489	58.1667	199	99.8992
	200	200	52.2935	58.3333	200	99.8995
	201	201	52.4535	58.5	201	99.8996
	202	202	52.6083	58.6667	202	99.9001
	203	203	52.7541	58.8333	203	99.9004
	204	204	52.914	59	204	99.9003
	205	205	53.0754	59.1667	205	99.9004
	206	206	53.2255	59.3333	206	99.9008
	207	207	53.3772	59.5	207	99.9009
	208	208	53.5232	59.6667	208	99.901
	209	209	53.6883	59.8333	209	99.9013
	210	210	53.8382	60	210	99.9018
	211	211	54.0006	60.1667	211	99.902
	212	212	54.1589	60.3333	212	99.9022
	213	213	54.3077	60.5	213	99.9025
	214	214	54.4657	60.6667	214	99.9026
	215	215	54.6233	60.8333	215	99.9024
	216	216	54.7616	61	216	99.9025
	217	217	54.9195	61.1667	217	99.9025
	218	218	55.0697	61.3333	218	99.9022
	219	219	55.2281	61.5	219	99.9022
	220	220	55.3955	61.6667	220	99.9024
	221	221	55.5438	61.8333	221	99.9027
	222	222	55.6974	62	222	99.903
	223	223	55.851	62.1667	223	99.9033
	224	224	56.0075	62.3333	224	99.9036
	225	225	56.1708	62.5	225	99.9037
	226	226	56.3258	62.6667	226	99.9037
	227	227	56.4908	62.8333	227	99.9038
	228	228	56.6506	63	228	99.9039
	229	229	56.7882	63.1667	229	99.9039
	230	230	56.9497	63.3333	230	99.9038
	231	231	57.1053	63.5	231	99.9039
	232	232	57.2589	63.6667	232	99.9039
	233	233	57.4208	63.8333	233	99.9039
	234	234	57.5609	64	234	99.9041
	235	235	57.7426	64.1667	235	99.9042
	236	236	57.8963	64.3333	236	99.904
	237	237	58.0539	64.5	237	99.9039
	238	238	58.2061	64.6667	238	99.904
	239	239	58.3642	64.8333	239	99.9041
	240	240	58.5253	65	240	99.9041
	241	241	58.6789	65.1667	241	99.9041
	242	242	58.8445	65.3333	242	99.9043
	243	243	59.0001	65.5	243	99.9043
	244	244	59.1546	65.6667	244	99.9044
	245	245	59.312	65.8333	245	99.9044
	246	246	59.4707	66	246	99.9045
	247	247	59.6286	66.1667	247	99.9044
	248	248	59.7893	66.3333	248	99.9042
	249	249	59.9433	66.5	249	99.9041
	250	250	60.1158	66.6667	250	99.904
	251	251	60.2589	66.8333	251	99.9036
	252	252	60.4252	67	252	99.9034
	253	253	60.584	67.1667	253	99.9033
	254	254	60.7401	67.3333	254	99.903
	255	255	60.906	67.5	255	99.9024
	256	256	61.0683	67.6667	256	99.9022
	257	257	61.2169	67.8333	257	99.9021
	258	258	61.374	68	258	99.9016
	259	259	61.54	68.1667	259	99.9008
	260	260	61.6969	68.3333	260	99.9001
	261	261	61.8594	68.5	261	99.8997
	262	262	62.012	68.6667	262	99.8992
	263	263	62.1694	68.8333	263	99.8988
	264	264	62.3268	69	264	99.8984
	265	265	62.4938	69.1667	265	99.8983
	266	266	62.652	69.3333	266	99.8981
	267	267	62.8171	69.5	267	99.8979
	268	268	62.9788	69.6667	268	99.8983
	269	269	63.123	69.8333	269	99.8984
	270	270	63.2912	70	270	99.8982
	271	271	63.4552	70.1667	271	99.898
	272	272	63.611	70.3333	272	99.8976
	273	273	63.7677	70.5	273	99.8972
	274	274	63.9279	70.6667	274	99.8969
	275	275	64.0953	70.8333	275	99.8967
	276	276	64.2615	71	276	99.8963
	277	277	64.408	71.1667	277	99.8962
	278	278	64.5664	71.3333	278	99.896
	279	279	64.7307	71.5	279	99.896
	280	280	64.8945	71.6667	280	99.8957
	281	281	65.056	71.8333	281	99.8953
	282	282	65.2138	72	282	99.8951
	283	283	65.3833	72.1667	283	99.8948
	284	284	65.5421	72.3333	284	99.8939
	285	285	65.7011	72.5	285	99.8932
	286	286	65.8555	72.6667	286	99.8928
	287	287	66.0212	72.8333	287	99.8928
	288	288	66.1741	73	288	99.8921
	289	289	66.3514	73.1667	289	99.8916
	290	290	66.5062	73.3333	290	99.8914
	291	291	66.674	73.5	291	99.8914
	292	292	66.8337	73.6667	292	99.8909
	293	293	66.9906	73.8333	293	99.8905
	294	294	67.1584	74	294	99.8904
	295	295	67.3206	74.1667	295	99.8904
	296	296	67.4784	74.3333	296	99.89
	297	297	67.6411	74.5	297	99.8896
	298	298	67.808	74.6667	298	99.8892
	299	299	67.9674	74.8333	299	99.889
	300	300	68.1317	75	300	99.8887
	301	301	68.2939	75.1667	301	99.8883
	302	302	68.4485	75.3333	302	99.8877
	303	303	68.6075	75.5	303	99.8868
	304	304	68.7703	75.6667	304	99.8864
	305	305	68.94	75.8333	305	99.8861
	306	306	69.0966	76	306	99.8858
	307	307	69.2486	76.1667	307	99.8852
	308	308	69.4368	76.3333	308	99.8846
	309	309	69.5865	76.5	309	99.8843
	310	310	69.758	76.6667	310	99.8841
	311	311	69.9121	76.8333	311	99.884
	312	312	70.0766	77	312	99.8833
	313	313	70.2505	77.1667	313	99.8827
	314	314	70.3996	77.3333	314	99.8825
	315	315	70.5636	77.5	315	99.8827
	316	316	70.7365	77.6667	316	99.8827
	317	317	70.8949	77.8333	317	99.8825
	318	318	71.059	78	318	99.8823
	319	319	71.2187	78.1667	319	99.8824
	320	320	71.3926	78.3333	320	99.8821
	321	321	71.5523	78.5	321	99.8815
	322	322	71.7107	78.6667	322	99.8807
	323	323	71.871	78.8333	323	99.8793
	324	324	72.0241	79	324	99.8786
	325	325	72.1895	79.1667	325	99.878
	326	326	72.3634	79.3333	326	99.8775
	327	327	72.5119	79.5	327	99.877
	328	328	72.6814	79.6667	328	99.8771
	329	329	72.8435	79.8333	329	99.8775
	330	330	73.0056	80	330	99.8775
	331	331	73.1805	80.1667	331	99.8775
	332	332	73.3468	80.3333	332	99.8776
	333	333	73.5083	80.5	333	99.8772
	334	334	73.6695	80.6667	334	99.8767
	335	335	73.8384	80.8333	335	99.8765
	336	336	73.9941	81	336	99.876
	337	337	74.1653	81.1667	337	99.8752
	338	338	74.321	81.3333	338	99.8744
	339	339	74.4889	81.5	339	99.8737
	340	340	74.6562	81.6667	340	99.8736
	341	341	74.8211	81.8333	341	99.8731
	342	342	74.99	82	342	99.8724
	343	343	75.154	82.1667	343	99.8713
	344	344	75.3167	82.3333	344	99.8696
	345	345	75.4818	82.5	345	99.8683
	346	346	75.6458	82.6667	346	99.8673
	347	347	75.8155	82.8333	347	99.8666
	348	348	75.9691	83	348	99.866
	349	349	76.1431	83.1667	349	99.8653
	350	350	76.3057	83.3333	350	99.8646
	351	351	76.467	83.5	351	99.864
	352	352	76.6346	83.6667	352	99.8646
	353	353	76.809	83.8333	353	99.8643
	354	354	76.9742	84	354	99.8636
	355	355	77.1326	84.1667	355	99.8629
	356	356	77.3013	84.3333	356	99.8619
	357	357	77.4572	84.5	357	99.8612
	358	358	77.6272	84.6667	358	99.8605
	359	359	77.796	84.8333	359	99.8598
	360	360	77.9592	85	360	99.8596
	361	361	78.1271	85.1667	361	99.859
	362	362	78.291	85.3333	362	99.8582
	363	363	78.454	85.5	363	99.8571
	364	364	78.6213	85.6667	364	99.8564
	365	365	78.7818	85.8333	365	99.8559
	366	366	78.9526	86	366	99.8553
	367	367	79.1251	86.1667	367	99.8546
	368	368	79.2802	86.3333	368	99.8537
	369	369	79.4505	86.5	369	99.8532
	370	370	79.611	86.6667	370	99.8525
	371	371	79.7869	86.8333	371	99.8518
	372	372	79.9523	87	372	99.8511
	373	373	80.1181	87.1667	373	99.8501
	374	374	80.2864	87.3333	374	99.8494
	375	375	80.4501	87.5	375	99.8485
	376	376	80.6097	87.6667	376	99.8473
	377	377	80.78	87.8333	377	99.8461
	378	378	80.9482	88	378	99.8454
	379	379	81.1214	88.1667	379	99.8449
	380	380	81.2799	88.3333	380	99.844
	381	381	81.4345	88.5	381	99.8431
	382	382	81.611	88.6667	382	99.8425
	383	383	81.7817	88.8333	383	99.8423
	384	384	81.9487	89	384	99.842
	385	385	82.1232	89.1667	385	99.8416
	386	386	82.2741	89.3333	386	99.8412
	387	387	82.4486	89.5	387	99.8412
	388	388	82.6274	89.6667	388	99.8411
	389	389	82.7898	89.8333	389	99.8409
	390	390	82.9567	90	390	99.8407
	391	391	83.1243	90.1667	391	99.8407
	392	392	83.2958	90.3333	392	99.841
	393	393	83.4623	90.5	393	99.8412
	394	394	83.6391	90.6667	394	99.8411
	395	395	83.8083	90.8333	395	99.8413
	396	396	83.9744	91	396	99.8418
	397	397	84.1425	91.1667	397	99.8423
	398	398	84.3006	91.3333	398	99.8423
	399	399	84.4863	91.5	399	99.8422
	400	400	84.6507	91.6667	400	99.8424
	401	401	84.838	91.8333	401	99.8429
	402	402	85.0114	92	402	99.8428
	403	403	85.1791	92.1667	403	99.8426
	404	404	85.3583	92.3333	404	99.8423
	405	405	85.5297	92.5	405	99.8425
	406	406	85.6994	92.6667	406	99.8425
	407	407	85.8783	92.8333	407	99.8423
	408	408	86.0424	93	408	99.8419
	409	409	86.2193	93.1667	409	99.8416
	410	410	86.401	93.3333	410	99.8417
	411	411	86.5678	93.5	411	99.8418
	412	412	86.7468	93.6667	412	99.8415
	413	413	86.9265	93.8333	413	99.8414
	414	414	87.0904	94	414	99.8412
	415	415	87.2699	94.1667	415	99.8409
	416	416	87.4412	94.3333	416	99.8404
	417	417	87.6243	94.5	417	99.8398
	418	418	87.7929	94.6667	418	99.839
	419	419	87.967	94.8333	419	99.8382
	420	420	88.1443	95	420	99.837
	421	421	88.3141	95.1667	421	99.8357
	422	422	88.4966	95.3333	422	99.8346
	423	423	88.6773	95.5	423	99.8331
	424	424	88.8478	95.6667	424	99.8315
	425	425	89.0273	95.8333	425	99.8304
	426	426	89.2074	96	426	99.829
	427	427	89.3824	96.1667	427	99.8277
	428	428	89.5664	96.3333	428	99.8263
	429	429	89.7383	96.5	429	99.8251
	430	430	89.913	96.6667	430	99.8244
	431	431	90.0871	96.8333	431	99.8235
	432	432	90.264	97	432	99.8226
	433	433	90.4463	97.1667	433	99.8218
	434	434	90.6214	97.3333	434	99.8202
	435	435	90.7936	97.5	435	99.8193
	436	436	90.9668	97.6667	436	99.8187
	437	437	91.1444	97.8333	437	99.8176
	438	438	91.3134	98	438	99.8169
	439	439	91.5	98.1667	439	99.8159
	440	440	91.676	98.3333	440	99.8149
	441	441	91.8641	98.5	441	99.8137
	442	442	92.0317	98.6667	442	99.8118
	443	443	92.2091	98.8333	443	99.81
	444	444	92.3817	99	444	99.8083
	445	445	92.5606	99.1667	445	99.8068
	446	446	92.7368	99.3333	446	99.8047
	447	447	92.9094	99.5	447	99.8026
	448	448	93.0951	99.6667	448	99.8008
	449	449	93.2681	99.8333	449	99.7997
	450	450	93.4465	100	450	99.799
	451	451	93.6307	100.167	451	99.7982
	452	452	93.8001	100.333	452	99.7973
	453	453	93.9817	100.5	453	99.7965
	454	454	94.155	100.667	454	99.7962
	455	455	94.3294	100.833	455	99.7954
	456	456	94.5153	101	456	99.7944
	457	457	94.6921	101.167	457	99.7929
	458	458	94.8678	101.333	458	99.7908
	459	459	95.0394	101.5	459	99.789
	460	460	95.2196	101.667	460	99.7873
	461	461	95.3872	101.833	461	99.785
	462	462	95.5728	102	462	99.7827
	463	463	95.7495	102.167	463	99.7807
	464	464	95.9302	102.333	464	99.7788
	465	465	96.1086	102.5	465	99.7766
	466	466	96.2855	102.667	466	99.7744
	467	467	96.4703	102.833	467	99.7723
	468	468	96.6404	103	468	99.7703
	469	469	96.8097	103.167	469	99.7684
	470	470	97.0014	103.333	470	99.7663
	471	471	97.1732	103.5	471	99.7641
	472	472	97.3451	103.667	472	99.762
	473	473	97.5266	103.833	473	99.7601
	474	474	97.7023	104	474	99.758
	475	475	97.878	104.167	475	99.7557
	476	476	98.0516	104.333	476	99.7535
	477	477	98.2275	104.5	477	99.7516
	478	478	98.4007	104.667	478	99.7498
	479	479	98.581	104.833	479	99.7477
	480	480	98.7568	105	480	99.7455
	481	481	98.9365	105.167	481	99.7437
	482	482	99.1191	105.333	482	99.7419
	483	483	99.2917	105.5	483	99.7401
	484	484	99.4682	105.667	484	99.7383
	485	485	99.6468	105.833	485	99.7362
	486	486	99.8215	106	486	99.7341
	487	487	100.004	106.167	487	99.7316
	488	488	100.172	106.333	488	99.7292
	489	489	100.346	106.5	489	99.7271
	490	490	100.529	106.667	490	99.7248
	491	491	100.705	106.833	491	99.7224
	492	492	100.882	107	492	99.7202
	493	493	101.062	107.167	493	99.718
	494	494	101.235	107.333	494	99.7155
	495	495	101.415	107.5	495	99.7139
	496	496	101.594	107.667	496	99.7122
	497	497	101.768	107.833	497	99.7104
	498	498	101.943	108	498	99.7087
	499	499	102.12	108.167	499	99.7066
	500	500	102.296	108.333	500	99.7048
	501	501	102.473	108.5	501	99.7032
	502	502	102.652	108.667	502	99.7014
	503	503	102.823	108.833	503	99.6992
	504	504	103.001	109	504	99.6971
	505	505	103.179	109.167	505	99.695
	506	506	103.345	109.333	506	99.6928
	507	507	103.518	109.5	507	99.6898
	508	508	103.703	109.667	508	99.6866
	509	509	103.882	109.833	509	99.6834
	510	510	104.058	110	510	99.6807
	511	511	104.239	110.167	511	99.6773
	512	512	104.411	110.333	512	99.6744
	513	513	104.582	110.5	513	99.6715
	514	514	104.756	110.667	514	99.6689
	515	515	104.936	110.833	515	99.6671
	516	516	105.105	111	516	99.6649
	517	517	105.286	111.167	517	99.6622
	518	518	105.45	111.333	518	99.659
	519	519	105.635	111.5	519	99.6556
	520	520	105.805	111.667	520	99.6526
	521	521	105.982	111.833	521	99.6497
	522	522	106.163	112	522	99.6466
	523	523	106.332	112.167	523	99.6432
	524	524	106.504	112.333	524	99.6397
	525	525	106.689	112.5	525	99.6362
	526	526	106.858	112.667	526	99.6331
	527	527	107.039	112.833	527	99.6299
	528	528	107.207	113	528	99.6267
	529	529	107.382	113.167	529	99.6237
	530	530	107.56	113.333	530	99.6212
	531	531	107.738	113.5	531	99.6191
	532	532	107.922	113.667	532	99.6167
	533	533	108.102	113.833	533	99.6142
	534	534	108.257	114	534	99.6117
	535	535	108.442	114.167	535	99.6093
	536	536	108.615	114.333	536	99.6063
	537	537	108.798	114.5	537	99.6028
	538	538	108.969	114.667	538	99.5993
	539	539	109.147	114.833	539	99.5956
	540	540	109.313	115	540	99.5925
	541	541	109.497	115.167	541	99.5895
	542	542	109.671	115.333	542	99.5866
	543	543	109.842	115.5	543	99.5841
	544	544	110.014	115.667	544	99.5814
	545	545	110.189	115.833	545	99.5784
	546	546	110.37	116	546	99.5752
	547	547	110.547	116.167	547	99.5717
	548	548	110.711	116.333	548	99.5683
	549	549	110.899	116.5	549	99.5652
	550	550	111.063	116.667	550	99.5625
	551	551	111.239	116.833	551	99.5598
	552	552	111.42	117	552	99.557
	553	553	111.598	117.167	553	99.5544
	554	554	111.765	117.333	554	99.5521
	555	555	111.94	117.5	555	99.5493
	556	556	112.123	117.667	556	99.5465
	557	557	112.293	117.833	557	99.5436
	558	558	112.466	118	558	99.5405
	559	559	112.643	118.167	559	99.5371
	560	560	112.824	118.333	560	99.534
	561	561	112.994	118.5	561	99.531
	562	562	113.171	118.667	562	99.528
	563	563	113.345	118.833	563	99.525
	564	564	113.523	119	564	99.5214
	565	565	113.685	119.167	565	99.5176
	566	566	113.85	119.333	566	99.5139
	567	567	114.034	119.5	567	99.5096
	568	568	114.214	119.667	568	99.5046
	569	569	114.385	119.833	569	99.4999
	570	570	114.555	120	570	99.4955
	571	571	114.73	120.167	571	99.4913
	572	572	114.911	120.333	572	99.4872
	573	573	115.086	120.5	573	99.4831
	574	574	115.253	120.667	574	99.4789
	575	575	115.433	120.833	575	99.4755
	576	576	115.597	121	576	99.4722
	577	577	115.783	121.167	577	99.4685
	578	578	115.956	121.333	578	99.4644
	579	579	116.127	121.5	579	99.4604
	580	580	116.299	121.667	580	99.4566
	581	581	116.481	121.833	581	99.4529
	582	582	116.657	122	582	99.4491
	583	583	116.833	122.167	583	99.4449
	584	584	117.013	122.333	584	99.4407
	585	585	117.18	122.5	585	99.4367
	586	586	117.352	122.667	586	99.4328
	587	587	117.53	122.833	587	99.4282
	588	588	117.701	123	588	99.4236
	589	589	117.874	123.167	589	99.4194
	590	590	118.047	123.333	590	99.4152
	591	591	118.204	123.5	591	99.4106
	592	592	118.388	123.667	592	99.4056
	593	593	118.576	123.833	593	99.4012
	594	594	118.754	124	594	99.3968
	595	595	118.918	124.167	595	99.3926
	596	596	119.097	124.333	596	99.3884
	597	597	119.263	124.5	597	99.3844
	598	598	119.435	124.667	598	99.3803
	599	599	119.61	124.833	599	99.3767
	600	600	119.795	125	600	99.3727
	601	601	119.962	125.167	601	99.3685
	602	602	120.143	125.333	602	99.364
	603	603	120.309	125.5	603	99.3589
	604	604	120.486	125.667	604	99.3545
	605	605	120.662	125.833	605	99.3502
	606	606	120.839	126	606	99.3457
	607	607	121.013	126.167	607	99.3409
	608	608	121.184	126.333	608	99.3363
	609	609	121.366	126.5	609	99.3316
	610	610	121.522	126.667	610	99.3269
	611	611	121.7	126.833	611	99.3218
	612	612	121.871	127	612	99.3168
	613	613	122.049	127.167	613	99.3121
	614	614	122.225	127.333	614	99.3076
	615	615	122.4	127.5	615	99.3041
	616	616	122.563	127.667	616	99.3008
	617	617	122.739	127.833	617	99.2975
	618	618	122.912	128	618	99.2941
	619	619	123.086	128.167	619	99.2915
	620	620	123.27	128.333	620	99.2878
	621	621	123.441	128.5	621	99.2838
	622	622	123.607	128.667	622	99.2795
	623	623	123.781	128.833	623	99.2738
	624	624	123.952	129	624	99.2689
	625	625	124.121	129.167	625	99.2636
	626	626	124.301	129.333	626	99.2581
	627	627	124.471	129.5	627	99.2524
	628	628	124.652	129.667	628	99.2469
	629	629	124.822	129.833	629	99.2411
	630	630	124.999	130	630	99.2351
	631	631	125.176	130.167	631	99.2293
	632	632	125.35	130.333	632	99.2235
	633	633	125.515	130.5	633	99.2175
	634	634	125.687	130.667	634	99.2114
	635	635	125.866	130.833	635	99.2057
	636	636	126.046	131	636	99.1999
	637	637	126.221	131.167	637	99.1937
	638	638	126.382	131.333	638	99.1876
	639	639	126.554	131.5	639	99.182
	640	640	126.734	131.667	640	99.1764
	641	641	126.9	131.833	641	99.1704
	642	642	127.076	132	642	99.1644
	643	643	127.244	132.167	643	99.1587
	644	644	127.419	132.333	644	99.1531
	645	645	127.598	132.5	645	99.1474
	646	646	127.765	132.667	646	99.1417
	647	647	127.947	132.833	647	99.1359
	648	648	128.123	133	648	99.1301
	649	649	128.289	133.167	649	99.1245
	650	650	128.463	133.333	650	99.1189
	651	651	128.638	133.5	651	99.1133
	652	652	128.813	133.667	652	99.1075
	653	653	128.978	133.833	653	99.1013
	654	654	129.16	134	654	99.0954
	655	655	129.33	134.167	655	99.0896
	656	656	129.503	134.333	656	99.0834
	657	657	129.677	134.5	657	99.0772
	658	658	129.851	134.667	658	99.0709
	659	659	130.027	134.833	659	99.0648
	660	660	130.195	135	660	99.059
	661	661	130.37	135.167	661	99.0532
	662	662	130.538	135.333	662	99.0473
	663	663	130.711	135.5	663	99.0411
	664	664	130.875	135.667	664	99.0353
	665	665	131.047	135.833	665	99.0295
	666	666	131.227	136	666	99.0235
	667	667	131.395	136.167	667	99.0173
	668	668	131.576	136.333	668	99.0108
	669	669	131.747	136.5	669	99.0043
	670	670	131.921	136.667	670	98.9981
	671	671	132.092	136.833	671	98.992
	672	672	132.264	137	672	98.9856
	673	673	132.439	137.167	673	98.9791
	674	674	132.616	137.333	674	98.9726
	675	675	132.783	137.5	675	98.966
	676	676	132.954	137.667	676	98.9597
	677	677	133.139	137.833	677	98.9532
	678	678	133.31	138	678	98.9466
	679	679	133.479	138.167	679	98.9399
	680	680	133.662	138.333	680	98.9335
	681	681	133.831	138.5	681	98.9271
	682	682	134.002	138.667	682	98.9204
	683	683	134.164	138.833	683	98.9135
	684	684	134.333	139	684	98.9064
	685	685	134.514	139.167	685	98.8994
	686	686	134.682	139.333	686	98.8925
	687	687	134.858	139.5	687	98.8858
	688	688	135.028	139.667	688	98.8787
	689	689	135.199	139.833	689	98.8714
	690	690	135.38	140	690	98.8643
	691	691	135.553	140.167	691	98.8573
	692	692	135.727	140.333	692	98.8505
	693	693	135.899	140.5	693	98.8435
	694	694	136.074	140.667	694	98.8363
	695	695	136.24	140.833	695	98.8292
	696	696	136.418	141	696	98.8224
	697	697	136.596	141.167	697	98.8155
	698	698	136.757	141.333	698	98.8086
	699	699	136.939	141.5	699	98.8018
	700	700	137.112	141.667	700	98.795
	701	701	137.283	141.833	701	98.7878
	702	702	137.455	142	702	98.7806
	703	703	137.624	142.167	703	98.7734
	704	704	137.796	142.333	704	98.7662
	705	705	137.968	142.5	705	98.7592
	706	706	138.135	142.667	706	98.7519
	707	707	138.318	142.833	707	98.7444
	708	708	138.496	143	708	98.7364
	709	709	138.668	143.167	709	98.728
	710	710	138.847	143.333	710	98.7195
	711	711	139.016	143.5	711	98.7111
	712	712	139.189	143.667	712	98.7015
	713	713	139.363	143.833	713	98.6924
	714	714	139.528	144	714	98.6842
	715	715	139.712	144.167	715	98.6766
	716	716	139.875	144.333	716	98.6709
	717	717	140.047	144.5	717	98.6649
	718	718	140.221	144.667	718	98.6586
	719	719	140.385	144.833	719	98.652
	720	720	140.563	145	720	98.6454
	721	721	140.746	145.167	721	98.6387
	722	722	140.909	145.333	722	98.6312
	723	723	141.082	145.5	723	98.6234
	724	724	141.255	145.667	724	98.6152
	725	725	141.43	145.833	725	98.605
	726	726	141.599	146	726	98.596
	727	727	141.77	146.167	727	98.5873
	728	728	141.94	146.333	728	98.5786
	729	729	142.109	146.5	729	98.5702
	730	730	142.284	146.667	730	98.5618
	731	731	142.451	146.833	731	98.5532
	732	732	142.627	147	732	98.5444
	733	733	142.798	147.167	733	98.5363
	734	734	142.976	147.333	734	98.5278
	735	735	143.152	147.5	735	98.519
	736	736	143.315	147.667	736	98.5101
	737	737	143.482	147.833	737	98.5017
	738	738	143.662	148	738	98.4934
	739	739	143.835	148.167	739	98.4849
	740	740	144.011	148.333	740	98.4763
	741	741	144.182	148.5	741	98.4685
	742	742	144.364	148.667	742	98.4603
	743	743	144.528	148.833	743	98.4522
	744	744	144.696	149	744	98.444
	745	745	144.869	149.167	745	98.4359
	746	746	145.049	149.333	746	98.4274
	747	747	145.213	149.5	747	98.4187
	748	748	145.386	149.667	748	98.4099
	749	749	145.557	149.833	749	98.4004
	750	750	145.732	150	750	98.3906
	751	751	145.909	150.167	751	98.3805
	752	752	146.08	150.333	752	98.3702
	753	753	146.252	150.5	753	98.3588
	754	754	146.42	150.667	754	98.3475
	755	755	146.597	150.833	755	98.3363
	756	756	146.77	151	756	98.325
	757	757	146.935	151.167	757	98.314
	758	758	147.113	151.333	758	98.3028
	759	759	147.285	151.5	759	98.2918
	760	760	147.461	151.667	760	98.2808
	761	761	147.633	151.833	761	98.2707
	762	762	147.801	152	762	98.2604
	763	763	147.982	152.167	763	98.2503
	764	764	148.15	152.333	764	98.2401
	765	765	148.316	152.5	765	98.2299
	766	766	148.489	152.667	766	98.2197
	767	767	148.661	152.833	767	98.2095
	768	768	148.838	153	768	98.1994
	769	769	149.015	153.167	769	98.1891
	770	770	149.182	153.333	770	98.1785
	771	771	149.355	153.5	771	98.1679
	772	772	149.531	153.667	772	98.1572
	773	773	149.697	153.833	773	98.147
	774	774	149.868	154	774	98.1367
	775	775	150.048	154.167	775	98.1264
	776	776	150.222	154.333	776	98.1159
	777	777	150.393	154.5	777	98.1054
	778	778	150.559	154.667	778	98.0947
	779	779	150.735	154.833	779	98.084
	780	780	150.902	155	780	98.0732
	781	781	151.074	155.167	781	98.0618
	782	782	151.249	155.333	782	98.0504
	783	783	151.425	155.5	783	98.0392
	784	784	151.596	155.667	784	98.0282
	785	785	151.77	155.833	785	98.0172
	786	786	151.952	156	786	98.0061
	787	787	152.115	156.167	787	97.9949
	788	788	152.295	156.333	788	97.9835
	789	789	152.459	156.5	789	97.9723
	790	790	152.639	156.667	790	97.9613
	791	791	152.805	156.833	791	97.9497
	792	792	152.975	157	792	97.9379
	793	793	153.157	157.167	793	97.9261
	794	794	153.326	157.333	794	97.9144
	795	795	153.504	157.5	795	97.9027
	796	796	153.667	157.667	796	97.8912
	797	797	153.842	157.833	797	97.8796
	798	798	154.007	158	798	97.8678
	799	799	154.177	158.167	799	97.8557
	800	800	154.349	158.333	800	97.8437
	801	801	154.523	158.5	801	97.8319
	802	802	154.696	158.667	802	97.8198
	803	803	154.868	158.833	803	97.8076
	804	804	155.048	159	804	97.7952
	805	805	155.211	159.167	805	97.7828
	806	806	155.379	159.333	806	97.7708
	807	807	155.55	159.5	807	97.7586
	808	808	155.726	159.667	808	97.7465
	809	809	155.897	159.833	809	97.7343
	810	810	156.063	160	810	97.7219
	811	811	156.23	160.167	811	97.7094
	812	812	156.414	160.333	812	97.697
	813	813	156.585	160.5	813	97.6846
	814	814	156.762	160.667	814	97.6716
	815	815	156.934	160.833	815	97.6585
	816	816	157.112	161	816	97.6456
	817	817	157.277	161.167	817	97.6326
	818	818	157.452	161.333	818	97.62
	819	819	157.618	161.5	819	97.607
	820	820	157.795	161.667	820	97.5938
	821	821	157.967	161.833	821	97.5804
	822	822	158.147	162	822	97.5674
	823	823	158.308	162.167	823	97.5543
	824	824	158.488	162.333	824	97.5413
	825	825	158.658	162.5	825	97.5284
	826	826	158.833	162.667	826	97.5157
	827	827	159.001	162.833	827	97.5025
	828	828	159.174	163	828	97.4891
	829	829	159.334	163.167	829	97.4756
	830	830	159.507	163.333	830	97.4622
	831	831	159.685	163.5	831	97.4488
	832	832	159.86	163.667	832	97.4353
	833	833	160.027	163.833	833	97.4216
	834	834	160.196	164	834	97.4078
	835	835	160.377	164.167	835	97.3938
	836	836	160.561	164.333	836	97.38
	837	837	160.728	164.5	837	97.3661
	838	838	160.892	164.667	838	97.3517
	839	839	161.059	164.833	839	97.3369
	840	840	161.238	165	840	97.3224
	841	841	161.412	165.167	841	97.3081
	842	842	161.581	165.333	842	97.2939
	843	843	161.761	165.5	843	97.2799
	844	844	161.926	165.667	844	97.2658
	845	845	162.09	165.833	845	97.2515
	846	846	162.268	166	846	97.2374
	847	847	162.438	166.167	847	97.2228
	848	848	162.615	166.333	848	97.2082
	849	849	162.792	166.5	849	97.1936
	850	850	162.951	166.667	850	97.178
	851	851	163.127	166.833	851	97.1623
	852	852	163.296	167	852	97.1469
	853	853	163.475	167.167	853	97.1317
	854	854	163.641	167.333	854	97.1166
	855	855	163.814	167.5	855	97.1015
	856	856	163.989	167.667	856	97.0867
	857	857	164.159	167.833	857	97.072
	858	858	164.332	168	858	97.0581
	859	859	164.499	168.167	859	97.0436
	860	860	164.675	168.333	860	97.0286
	861	861	164.846	168.5	861	97.0134
	862	862	165.026	168.667	862	96.998
	863	863	165.194	168.833	863	96.9827
	864	864	165.364	169	864	96.9672
	865	865	165.537	169.167	865	96.9516
	866	866	165.699	169.333	866	96.9352
	867	867	165.871	169.5	867	96.9189
	868	868	166.055	169.667	868	96.9027
	869	869	166.231	169.833	869	96.8865
	870	870	166.39	170	870	96.8696
	871	871	166.57	170.167	871	96.8528
	872	872	166.747	170.333	872	96.8361
	873	873	166.915	170.5	873	96.8195
	874	874	167.078	170.667	874	96.8029
	875	875	167.257	170.833	875	96.7861
	876	876	167.434	171	876	96.7689
	877	877	167.593	171.167	877	96.7517
	878	878	167.773	171.333	878	96.735
	879	879	167.943	171.5	879	96.7182
	880	880	168.115	171.667	880	96.7011
	881	881	168.283	171.833	881	96.684
	882	882	168.461	172	882	96.6666
	883	883	168.635	172.167	883	96.6494
	884	884	168.81	172.333	884	96.6322
	885	885	168.983	172.5	885	96.615
	886	886	169.148	172.667	886	96.5975
	887	887	169.319	172.833	887	96.5795
	888	888	169.487	173	888	96.5616
	889	889	169.661	173.167	889	96.5438
	890	890	169.835	173.333	890	96.526
	891	891	170	173.5	891	96.5078
	892	892	170.183	173.667	892	96.4892
	893	893	170.353	173.833	893	96.4707
	894	894	170.518	174	894	96.4523
	895	895	170.687	174.167	895	96.4343
	896	896	170.86	174.333	896	96.4159
	897	897	171.03	174.5	897	96.3974
	898	898	171.209	174.667	898	96.3787
	899	899	171.379	174.833	899	96.3602
	900	900	171.553	175	900	96.3416
	901	901	171.722	175.167	901	96.323
	902	902	171.905	175.333	902	96.3046
	903	903	172.08	175.5	903	96.286
	904	904	172.242	175.667	904	96.2669
	905	905	172.411	175.833	905	96.2479
	906	906	172.577	176	906	96.2287
	907	907	172.76	176.167	907	96.2097
	908	908	172.928	176.333	908	96.1905
	909	909	173.094	176.5	909	96.1713
	910	910	173.277	176.667	910	96.1519
	911	911	173.447	176.833	911	96.1328
	912	912	173.624	177	912	96.1134
	913	913	173.79	177.167	913	96.0941
	914	914	173.965	177.333	914	96.0748
	915	915	174.137	177.5	915	96.0555
	916	916	174.315	177.667	916	96.0357
	917	917	174.471	177.833	917	96.0158
	918	918	174.646	178	918	95.9958
	919	919	174.824	178.167	919	95.976
	920	920	174.982	178.333	920	95.956
	921	921	175.157	178.5	921	95.9361
	922	922	175.333	178.667	922	95.9159
	923	923	175.503	178.833	923	95.8955
	924	924	175.684	179	924	95.8748
	925	925	175.851	179.167	925	95.8541
	926	926	176.022	179.333	926	95.8334
	927	927	176.196	179.5	927	95.8119
	928	928	176.372	179.667	928	95.7904
	929	929	176.535	179.833	929	95.7692
	930	930	176.708	180	930	95.7481
	931	931	176.877	180.167	931	95.727
	932	932	177.059	180.333	932	95.7059
	933	933	177.227	180.5	933	95.6846
	934	934	177.391	180.667	934	95.663
	935	935	177.561	180.833	935	95.6419
	936	936	177.738	181	936	95.6204
	937	937	177.923	181.167	937	95.599
	938	938	178.081	181.333	938	95.5774
	939	939	178.246	181.5	939	95.5553
	940	940	178.422	181.667	940	95.533
	941	941	178.587	181.833	941	95.5109
	942	942	178.766	182	942	95.4889
	943	943	178.949	182.167	943	95.4667
	944	944	179.112	182.333	944	95.4446
	945	945	179.289	182.5	945	95.4223
	946	946	179.456	182.667	946	95.3997
	947	947	179.632	182.833	947	95.3775
	948	948	179.796	183	948	95.3549
	949	949	179.967	183.167	949	95.3324
	950	950	180.145	183.333	950	95.3099
	951	951	180.322	183.5	951	95.2871
	952	952	180.497	183.667	952	95.2639
	953	953	180.657	183.833	953	95.2406
	954	954	180.828	184	954	95.2174
	955	955	181.001	184.167	955	95.1942
	956	956	181.167	184.333	956	95.171
	957	957	181.348	184.5	957	95.1475
	958	958	181.521	184.667	958	95.124
	959	959	181.687	184.833	959	95.1003
	960	960	181.859	185	960	95.077
	961	961	182.038	185.167	961	95.0534
	962	962	182.211	185.333	962	95.0299
	963	963	182.38	185.5	963	95.0059
	964	964	182.559	185.667	964	94.9814
	965	965	182.721	185.833	965	94.9566
	966	966	182.896	186	966	94.9319
	967	967	183.071	186.167	967	94.9072
	968	968	183.234	186.333	968	94.8824
	969	969	183.41	186.5	969	94.8571
	970	970	183.583	186.667	970	94.8319
	971	971	183.755	186.833	971	94.8068
	972	972	183.931	187	972	94.7822
	973	973	184.095	187.167	973	94.7572
	974	974	184.266	187.333	974	94.7322
	975	975	184.437	187.5	975	94.7071
	976	976	184.612	187.667	976	94.6816
	977	977	184.79	187.833	977	94.6558
	978	978	184.959	188	978	94.6302
	979	979	185.128	188.167	979	94.6046
	980	980	185.3	188.333	980	94.5788
	981	981	185.481	188.5	981	94.5533
	982	982	185.646	188.667	982	94.5274
	983	983	185.817	188.833	983	94.5012
	984	984	185.991	189	984	94.4753
	985	985	186.158	189.167	985	94.449
	986	986	186.337	189.333	986	94.4229
	987	987	186.504	189.5	987	94.3968
	988	988	186.672	189.667	988	94.3702
	989	989	186.851	189.833	989	94.3431
	990	990	187.012	190	990	94.3161
	991	991	187.19	190.167	991	94.2892
	992	992	187.365	190.333	992	94.2622
	993	993	187.534	190.5	993	94.2352
	994	994	187.707	190.667	994	94.2082
	995	995	187.873	190.833	995	94.1811
	996	996	188.049	191	996	94.1541
	997	997	188.216	191.167	997	94.1264
	998	998	188.38	191.333	998	94.0989
	999	999	188.558	191.5	999	94.0714
	1000	1000	188.734	191.667	1000	94.043
	1001	1001	188.903	191.833	1001	94.0146
	1002	1002	189.078	192	1002	93.9862
	1003	1003	189.243	192.167	1003	93.9577
	1004	1004	189.422	192.333	1004	93.9295
	1005	1005	189.589	192.5	1005	93.9009
	1006	1006	189.765	192.667	1006	93.8726
	1007	1007	189.934	192.833	1007	93.8444
	1008	1008	190.102	193	1008	93.8162
	1009	1009	190.276	193.167	1009	93.7873
	1010	1010	190.446	193.333	1010	93.7583
	1011	1011	190.622	193.5	1011	93.7293
	1012	1012	190.794	193.667	1012	93.7
	1013	1013	190.968	193.833	1013	93.6706
	1014	1014	191.135	194	1014	93.641
	1015	1015	191.3	194.167	1015	93.6111
	1016	1016	191.477	194.333	1016	93.5814
	1017	1017	191.648	194.5	1017	93.5512
	1018	1018	191.818	194.667	1018	93.5213
	1019	1019	191.993	194.833	1019	93.4915
	1020	1020	192.158	195	1020	93.4611
	1021	1021	192.334	195.167	1021	93.4307
	1022	1022	192.505	195.333	1022	93.4
	1023	1023	192.679	195.5	1023	93.3693
	1024	1024	192.85	195.667	1024	93.3386
	1025	1025	193.02	195.833	1025	93.308
	1026	1026	193.197	196	1026	93.2768
	1027	1027	193.362	196.167	1027	93.2457
	1028	1028	193.537	196.333	1028	93.2149
	1029	1029	193.698	196.5	1029	93.184
	1030	1030	193.875	196.667	1030	93.1528
	1031	1031	194.048	196.833	1031	93.1215
	1032	1032	194.221	197	1032	93.0901
	1033	1033	194.391	197.167	1033	93.0584
	1034	1034	194.564	197.333	1034	93.026
	1035	1035	194.735	197.5	1035	92.9939
	1036	1036	194.906	197.667	1036	92.9621
	1037	1037	195.076	197.833	1037	92.9302
	1038	1038	195.251	198	1038	92.8977
	1039	1039	195.421	198.167	1039	92.865
	1040	1040	195.595	198.333	1040	92.8321
	1041	1041	195.767	198.5	1041	92.7993
	1042	1042	195.943	198.667	1042	92.7661
	1043	1043	196.106	198.833	1043	92.7332
	1044	1044	196.273	199	1044	92.7004
	1045	1045	196.452	199.167	1045	92.6679
	1046	1046	196.625	199.333	1046	92.635
	1047	1047	196.802	199.5	1047	92.6023
	1048	1048	196.969	199.667	1048	92.5693
	1049	1049	197.143	199.833	1049	92.5361
	1050	1050	197.31	200	1050	92.5023
	1051	1051	197.488	200.167	1051	92.4686
	1052	1052	197.659	200.333	1052	92.4349
	1053	1053	197.834	200.5	1053	92.4001
	1054	1054	198.008	200.667	1054	92.3653
	1055	1055	198.17	200.833	1055	92.3303
	1056	1056	198.342	201	1056	92.2954
	1057	1057	198.517	201.167	1057	92.2606
	1058	1058	198.686	201.333	1058	92.2251
	1059	1059	198.862	201.5	1059	92.1896
	1060	1060	199.032	201.667	1060	92.154
	1061	1061	199.202	201.833	1061	92.1186
	1062	1062	199.37	202	1062	92.083
	1063	1063	199.544	202.167	1063	92.0475
	1064	1064	199.723	202.333	1064	92.012
	1065	1065	199.894	202.5	1065	91.9766
	1066	1066	200.065	202.667	1066	91.9406
	1067	1067	200.24	202.833	1067	91.9044
	1068	1068	200.406	203	1068	91.8681
	1069	1069	200.583	203.167	1069	91.832
	1070	1070	200.748	203.333	1070	91.7955
	1071	1071	200.919	203.5	1071	91.7593
	1072	1072	201.092	203.667	1072	91.7231
	1073	1073	201.255	203.833	1073	91.6865
	1074	1074	201.439	204	1074	91.6492
	1075	1075	201.606	204.167	1075	91.612
	1076	1076	201.778	204.333	1076	91.5746
	1077	1077	201.942	204.5	1077	91.537
	1078	1078	202.118	204.667	1078	91.499
	1079	1079	202.286	204.833	1079	91.4609
	1080	1080	202.451	205	1080	91.4225
	1081	1081	202.638	205.167	1081	91.3845
	1082	1082	202.809	205.333	1082	91.3461
	1083	1083	202.977	205.5	1083	91.3079
	1084	1084	203.146	205.667	1084	91.2696
	1085	1085	203.321	205.833	1085	91.2314
	1086	1086	203.487	206	1086	91.1925
	1087	1087	203.66	206.167	1087	91.1534
	1088	1088	203.829	206.333	1088	91.1142
	1089	1089	204.003	206.5	1089	91.0751
	1090	1090	204.176	206.667	1090	91.0356
	1091	1091	204.349	206.833	1091	90.9962
	1092	1092	204.523	207	1092	90.9566
	1093	1093	204.688	207.167	1093	90.9169
	1094	1094	204.857	207.333	1094	90.8766
	1095	1095	205.025	207.5	1095	90.8364
	1096	1096	205.2	207.667	1096	90.7963
	1097	1097	205.377	207.833	1097	90.7559
	1098	1098	205.549	208	1098	90.7151
	1099	1099	205.709	208.167	1099	90.674
	1100	1100	205.886	208.333	1100	90.6328
	1101	1101	206.055	208.5	1101	90.5919
	1102	1102	206.242	208.667	1102	90.5505
	1103	1103	206.412	208.833	1103	90.5091
	1104	1104	206.579	209	1104	90.4676
	1105	1105	206.746	209.167	1105	90.4259
	1106	1106	206.92	209.333	1106	90.3837
	1107	1107	207.09	209.5	1107	90.3418
	1108	1108	207.263	209.667	1108	90.2999
	1109	1109	207.433	209.833	1109	90.2579
	1110	1110	207.604	210	1110	90.2158
	1111	1111	207.78	210.167	1111	90.174
	1112	1112	207.954	210.333	1112	90.1322
	1113	1113	208.124	210.5	1113	90.0902
	1114	1114	208.293	210.667	1114	90.0482
	1115	1115	208.464	210.833	1115	90.0052
	1116	1116	208.641	211	1116	89.9623
	1117	1117	208.807	211.167	1117	89.9192
	1118	1118	208.984	211.333	1118	89.8754
	1119	1119	209.151	211.5	1119	89.8315
	1120	1120	209.33	211.667	1120	89.7878
	1121	1121	209.502	211.833	1121	89.744
	1122	1122	209.666	212	1122	89.7002
	1123	1123	209.838	212.167	1123	89.6553
	1124	1124	210.005	212.333	1124	89.6103
	1125	1125	210.184	212.5	1125	89.5654
	1126	1126	210.355	212.667	1126	89.52
	1127	1127	210.527	212.833	1127	89.4742
	1128	1128	210.702	213	1128	89.4287
	1129	1129	210.871	213.167	1129	89.3833
	1130	1130	211.039	213.333	1130	89.3387
	1131	1131	211.208	213.5	1131	89.2931
	1132	1132	211.381	213.667	1132	89.2473
	1133	1133	211.556	213.833	1133	89.2012
	1134	1134	211.734	214	1134	89.155
	1135	1135	211.899	214.167	1135	89.1085
	1136	1136	212.063	214.333	1136	89.0621
	1137	1137	212.242	214.5	1137	89.0156
	1138	1138	212.415	214.667	1138	88.969
	1139	1139	212.589	214.833	1139	88.922
	1140	1140	212.763	215	1140	88.8748
	1141	1141	212.937	215.167	1141	88.8274
	1142	1142	213.106	215.333	1142	88.7802
	1143	1143	213.271	215.5	1143	88.7325
	1144	1144	213.45	215.667	1144	88.6849
	1145	1145	213.616	215.833	1145	88.6373
	1146	1146	213.79	216	1146	88.5894
	1147	1147	213.967	216.167	1147	88.5407
	1148	1148	214.135	216.333	1148	88.4921
	1149	1149	214.315	216.5	1149	88.4433
	1150	1150	214.474	216.667	1150	88.3945
	1151	1151	214.637	216.833	1151	88.3453
	1152	1152	214.814	217	1152	88.2964
	1153	1153	214.984	217.167	1153	88.2472
	1154	1154	215.159	217.333	1154	88.1979
	1155	1155	215.331	217.5	1155	88.1479
	1156	1156	215.507	217.667	1156	88.098
	1157	1157	215.681	217.833	1157	88.048
	1158	1158	215.849	218	1158	87.9971
	1159	1159	216.022	218.167	1159	87.9459
	1160	1160	216.187	218.333	1160	87.8949
	1161	1161	216.352	218.5	1161	87.8439
	1162	1162	216.538	218.667	1162	87.7929
	1163	1163	216.695	218.833	1163	87.7417
	1164	1164	216.875	219	1164	87.6907
	1165	1165	217.041	219.167	1165	87.6395
	1166	1166	217.214	219.333	1166	87.5883
	1167	1167	217.39	219.5	1167	87.5362
	1168	1168	217.568	219.667	1168	87.4843
	1169	1169	217.73	219.833	1169	87.4324
	1170	1170	217.905	220	1170	87.3801
	1171	1171	218.071	220.167	1171	87.3277
	1172	1172	218.249	220.333	1172	87.2755
	1173	1173	218.42	220.5	1173	87.2229
	1174	1174	218.588	220.667	1174	87.1705
	1175	1175	218.769	220.833	1175	87.1173
	1176	1176	218.936	221	1176	87.0642
	1177	1177	219.109	221.167	1177	87.011
	1178	1178	219.275	221.333	1178	86.9574
	1179	1179	219.44	221.5	1179	86.9031
	1180	1180	219.619	221.667	1180	86.8488
	1181	1181	219.794	221.833	1181	86.7944
	1182	1182	219.952	222	1182	86.7399
	1183	1183	220.127	222.167	1183	86.6854
	1184	1184	220.298	222.333	1184	86.6305
	1185	1185	220.475	222.5	1185	86.5758
	1186	1186	220.638	222.667	1186	86.521
	1187	1187	220.812	222.833	1187	86.466
	1188	1188	220.987	223	1188	86.4102
	1189	1189	221.154	223.167	1189	86.3544
	1190	1190	221.323	223.333	1190	86.2985
	1191	1191	221.501	223.5	1191	86.2421
	1192	1192	221.675	223.667	1192	86.1853
	1193	1193	221.85	223.833	1193	86.1284
	1194	1194	222.023	224	1194	86.0714
	1195	1195	222.189	224.167	1195	86.0146
	1196	1196	222.358	224.333	1196	85.9573
	1197	1197	222.523	224.5	1197	85.9002
	1198	1198	222.707	224.667	1198	85.8431
	1199	1199	222.87	224.833	1199	85.7859
	1200	1200	223.044	225	1200	85.7277
	1201	1201	223.21	225.167	1201	85.6696
	1202	1202	223.379	225.333	1202	85.6115
	1203	1203	223.552	225.5	1203	85.5532
	1204	1204	223.729	225.667	1204	85.4946
	1205	1205	223.891	225.833	1205	85.4362
	1206	1206	224.066	226	1206	85.3776
	1207	1207	224.242	226.167	1207	85.319
	1208	1208	224.415	226.333	1208	85.2592
	1209	1209	224.58	226.5	1209	85.1995
	1210	1210	224.754	226.667	1210	85.1398
	1211	1211	224.927	226.833	1211	85.0797
	1212	1212	225.1	227	1212	85.0195
	1213	1213	225.278	227.167	1213	84.9593
	1214	1214	225.444	227.333	1214	84.8989
	1215	1215	225.612	227.5	1215	84.8385
	1216	1216	225.782	227.667	1216	84.7772
	1217	1217	225.95	227.833	1217	84.716
	1218	1218	226.126	228	1218	84.6549
	1219	1219	226.291	228.167	1219	84.5933
	1220	1220	226.467	228.333	1220	84.5319
	1221	1221	226.64	228.5	1221	84.4704
	1222	1222	226.81	228.667	1222	84.4087
	1223	1223	226.99	228.833	1223	84.347
	1224	1224	227.151	229	1224	84.2846
	1225	1225	227.319	229.167	1225	84.2222
	1226	1226	227.484	229.333	1226	84.1597
	1227	1227	227.658	229.5	1227	84.0968
	1228	1228	227.827	229.667	1228	84.0333
	1229	1229	228.006	229.833	1229	83.9698
	1230	1230	228.174	230	1230	83.9059
	1231	1231	228.352	230.167	1231	83.8423
	1232	1232	228.521	230.333	1232	83.7779
	1233	1233	228.692	230.5	1233	83.7136
	1234	1234	228.855	230.667	1234	83.6491
	1235	1235	229.027	230.833	1235	83.5846
	1236	1236	229.202	231	1236	83.5199
	1237	1237	229.38	231.167	1237	83.4558
	1238	1238	229.547	231.333	1238	83.3919
	1239	1239	229.712	231.5	1239	83.3289
	1240	1240	229.881	231.667	1240	83.2642
	1241	1241	230.062	231.833	1241	83.199
	1242	1242	230.231	232	1242	83.1332
	1243	1243	230.407	232.167	1243	83.0669
	1244	1244	230.574	232.333	1244	82.9996
	1245	1245	230.735	232.5	1245	82.9322
	1246	1246	230.911	232.667	1246	82.8643
	1247	1247	231.083	232.833	1247	82.7953
	1248	1248	231.256	233	1248	82.7267
	1249	1249	231.423	233.167	1249	82.6581
	1250	1250	231.598	233.333	1250	82.5893
	1251	1251	231.769	233.5	1251	82.5201
	1252	1252	231.944	233.667	1252	82.451
	1253	1253	232.11	233.833	1253	82.3813
	1254	1254	232.287	234	1254	82.3116
	1255	1255	232.449	234.167	1255	82.2413
	1256	1256	232.619	234.333	1256	82.1711
	1257	1257	232.791	234.5	1257	82.1002
	1258	1258	232.967	234.667	1258	82.0296
	1259	1259	233.138	234.833	1259	81.959
	1260	1260	233.313	235	1260	81.8882
	1261	1261	233.476	235.167	1261	81.8167
	1262	1262	233.648	235.333	1262	81.7452
	1263	1263	233.815	235.5	1263	81.6741
	1264	1264	233.992	235.667	1264	81.6028
	1265	1265	234.166	235.833	1265	81.5309
	1266	1266	234.333	236	1266	81.459
	1267	1267	234.504	236.167	1267	81.3868
	1268	1268	234.671	236.333	1268	81.3144
	1269	1269	234.849	236.5	1269	81.2414
	1270	1270	235.02	236.667	1270	81.1685
	1271	1271	235.183	236.833	1271	81.0955
	1272	1272	235.355	237	1272	81.0226
	1273	1273	235.531	237.167	1273	80.9493
	1274	1274	235.704	237.333	1274	80.8763
	1275	1275	235.874	237.5	1275	80.8031
	1276	1276	236.044	237.667	1276	80.7297
	1277	1277	236.217	237.833	1277	80.655
	1278	1278	236.391	238	1278	80.5803
	1279	1279	236.553	238.167	1279	80.5054
	1280	1280	236.724	238.333	1280	80.4296
	1281	1281	236.898	238.5	1281	80.3534
	1282	1282	237.067	238.667	1282	80.2772
	1283	1283	237.241	238.833	1283	80.201
	1284	1284	237.417	239	1284	80.1249
	1285	1285	237.586	239.167	1285	80.0481
	1286	1286	237.755	239.333	1286	79.9715
	1287	1287	237.927	239.5	1287	79.8946
	1288	1288	238.098	239.667	1288	79.8175
	1289	1289	238.272	239.833	1289	79.7396
	1290	1290	238.439	240	1290	79.6621
	1291	1291	238.606	240.167	1291	79.5845
	1292	1292	238.777	240.333	1292	79.5067
	1293	1293	238.951	240.5	1293	79.4286
	1294	1294	239.119	240.667	1294	79.3504
	1295	1295	239.288	240.833	1295	79.2717
	1296	1296	239.454	241	1296	79.193
	1297	1297	239.628	241.167	1297	79.1134
	1298	1298	239.802	241.333	1298	79.034
	1299	1299	239.97	241.5	1299	78.9545
	1300	1300	240.143	241.667	1300	78.8747
	1301	1301	240.313	241.833	1301	78.7948
	1302	1302	240.492	242	1302	78.7156
	1303	1303	240.661	242.167	1303	78.6367
	1304	1304	240.837	242.333	1304	78.5583
	1305	1305	240.999	242.5	1305	78.4782
	1306	1306	241.183	242.667	1306	78.3976
	1307	1307	241.348	242.833	1307	78.3165
	1308	1308	241.522	243	1308	78.2343
	1309	1309	241.688	243.167	1309	78.1516
	1310	1310	241.859	243.333	1310	78.0685
	1311	1311	242.023	243.5	1311	77.9851
	1312	1312	242.199	243.667	1312	77.9008
	1313	1313	242.361	243.833	1313	77.8163
	1314	1314	242.536	244	1314	77.7323
	1315	1315	242.709	244.167	1315	77.6484
	1316	1316	242.88	244.333	1316	77.5651
	1317	1317	243.047	244.5	1317	77.4807
	1318	1318	243.212	244.667	1318	77.396
	1319	1319	243.386	244.833	1319	77.311
	1320	1320	243.564	245	1320	77.226
	1321	1321	243.729	245.167	1321	77.1402
	1322	1322	243.902	245.333	1322	77.0545
	1323	1323	244.076	245.5	1323	76.9687
	1324	1324	244.243	245.667	1324	76.883
	1325	1325	244.419	245.833	1325	76.7964
	1326	1326	244.594	246	1326	76.7098
	1327	1327	244.76	246.167	1327	76.6228
	1328	1328	244.928	246.333	1328	76.5359
	1329	1329	245.098	246.5	1329	76.4482
	1330	1330	245.274	246.667	1330	76.3607
	1331	1331	245.433	246.833	1331	76.2731
	1332	1332	245.603	247	1332	76.1848
	1333	1333	245.78	247.167	1333	76.0956
	1334	1334	245.954	247.333	1334	76.0065
	1335	1335	246.127	247.5	1335	75.9175
	1336	1336	246.297	247.667	1336	75.8287
	1337	1337	246.469	247.833	1337	75.7391
	1338	1338	246.638	248	1338	75.6498
	1339	1339	246.814	248.167	1339	75.5605
	1340	1340	246.982	248.333	1340	75.4716
	1341	1341	247.149	248.5	1341	75.3816
	1342	1342	247.318	248.667	1342	75.2912
	1343	1343	247.497	248.833	1343	75.2003
	1344	1344	247.663	249	1344	75.1093
	1345	1345	247.836	249.167	1345	75.0176
	1346	1346	248.003	249.333	1346	74.9251
	1347	1347	248.173	249.5	1347	74.8323
	1348	1348	248.348	249.667	1348	74.7392
	1349	1349	248.513	249.833	1349	74.6457
	1350	1350	248.685	250	1350	74.5521
	1351	1351	248.857	250.167	1351	74.4589
	1352	1352	249.022	250.333	1352	74.3655
	1353	1353	249.203	250.5	1353	74.2726
	1354	1354	249.364	250.667	1354	74.1782
	1355	1355	249.531	250.833	1355	74.0837
	1356	1356	249.704	251	1356	73.9891
	1357	1357	249.883	251.167	1357	73.8943
	1358	1358	250.052	251.333	1358	73.7987
	1359	1359	250.216	251.5	1359	73.7034
	1360	1360	250.393	251.667	1360	73.6078
	1361	1361	250.569	251.833	1361	73.5119
	1362	1362	250.737	252	1362	73.4149
	1363	1363	250.903	252.167	1363	73.318
	1364	1364	251.077	252.333	1364	73.2211
	1365	1365	251.237	252.5	1365	73.1236
	1366	1366	251.412	252.667	1366	73.0257
	1367	1367	251.584	252.833	1367	72.9281
	1368	1368	251.749	253	1368	72.8302
	1369	1369	251.927	253.167	1369	72.7324
	1370	1370	252.099	253.333	1370	72.6334
	1371	1371	252.27	253.5	1371	72.5346
	1372	1372	252.439	253.667	1372	72.4356
	1373	1373	252.607	253.833	1373	72.3363
	1374	1374	252.783	254	1374	72.2366
	1375	1375	252.953	254.167	1375	72.1372
	1376	1376	253.115	254.333	1376	72.0377
	1377	1377	253.29	254.5	1377	71.9382
	1378	1378	253.458	254.667	1378	71.8373
	1379	1379	253.632	254.833	1379	71.7365
	1380	1380	253.804	255	1380	71.6355
	1381	1381	253.976	255.167	1381	71.5338
	1382	1382	254.141	255.333	1382	71.4316
	1383	1383	254.313	255.5	1383	71.3299
	1384	1384	254.481	255.667	1384	71.2281
	1385	1385	254.657	255.833	1385	71.1262
	1386	1386	254.83	256	1386	71.0229
	1387	1387	254.995	256.167	1387	70.9195
	1388	1388	255.172	256.333	1388	70.816
	1389	1389	255.342	256.5	1389	70.7118
	1390	1390	255.518	256.667	1390	70.6071
	1391	1391	255.682	256.833	1391	70.5027
	1392	1392	255.85	257	1392	70.3983
	1393	1393	256.022	257.167	1393	70.2937
	1394	1394	256.194	257.333	1394	70.1877
	1395	1395	256.363	257.5	1395	70.0818
	1396	1396	256.536	257.667	1396	69.9759
	1397	1397	256.706	257.833	1397	69.8696
	1398	1398	256.875	258	1398	69.7628
	1399	1399	257.05	258.167	1399	69.6563
	1400	1400	257.223	258.333	1400	69.5496
	1401	1401	257.39	258.5	1401	69.4427
	1402	1402	257.572	258.667	1402	69.3346
	1403	1403	257.736	258.833	1403	69.2267
	1404	1404	257.905	259	1404	69.1186
	1405	1405	258.075	259.167	1405	69.01
	1406	1406	258.246	259.333	1406	68.9009
	1407	1407	258.417	259.5	1407	68.7923
	1408	1408	258.591	259.667	1408	68.6836
	1409	1409	258.758	259.833	1409	68.5751
	1410	1410	258.934	260	1410	68.465
	1411	1411	259.109	260.167	1411	68.3547
	1412	1412	259.271	260.333	1412	68.2442
	1413	1413	259.435	260.5	1413	68.1329
	1414	1414	259.614	260.667	1414	68.0218
	1415	1415	259.784	260.833	1415	67.9099
	1416	1416	259.947	261	1416	67.7983
	1417	1417	260.121	261.167	1417	67.6862
	1418	1418	260.284	261.333	1418	67.5737
	1419	1419	260.455	261.5	1419	67.4603
	1420	1420	260.624	261.667	1420	67.3471
	1421	1421	260.801	261.833	1421	67.2335
	1422	1422	260.967	262	1422	67.1202
	1423	1423	261.136	262.167	1423	67.0061
	1424	1424	261.312	262.333	1424	66.8923
	1425	1425	261.485	262.5	1425	66.7791
	1426	1426	261.661	262.667	1426	66.6652
	1427	1427	261.824	262.833	1427	66.5502
	1428	1428	261.995	263	1428	66.4351
	1429	1429	262.159	263.167	1429	66.3197
	1430	1430	262.329	263.333	1430	66.2043
	1431	1431	262.497	263.5	1431	66.0879
	1432	1432	262.676	263.667	1432	65.9715
	1433	1433	262.85	263.833	1433	65.8542
	1434	1434	263.018	264	1434	65.7369
	1435	1435	263.187	264.167	1435	65.6189
	1436	1436	263.352	264.333	1436	65.5011
	1437	1437	263.522	264.5	1437	65.3831
	1438	1438	263.699	264.667	1438	65.2653
	1439	1439	263.859	264.833	1439	65.1466
	1440	1440	264.03	265	1440	65.0278
	1441	1441	264.206	265.167	1441	64.9086
	1442	1442	264.378	265.333	1442	64.7895
	1443	1443	264.549	265.5	1443	64.6696
	1444	1444	264.719	265.667	1444	64.5499
	1445	1445	264.89	265.833	1445	64.4301
	1446	1446	265.052	266	1446	64.3102
	1447	1447	265.226	266.167	1447	64.1892
	1448	1448	265.395	266.333	1448	64.0679
	1449	1449	265.573	266.5	1449	63.9464
	1450	1450	265.74	266.667	1450	63.8249
	1451	1451	265.914	266.833	1451	63.7023
	1452	1452	266.082	267	1452	63.5801
	1453	1453	266.254	267.167	1453	63.4577
	1454	1454	266.422	267.333	1454	63.3354
	1455	1455	266.599	267.5	1455	63.2123
	1456	1456	266.771	267.667	1456	63.0889
	1457	1457	266.929	267.833	1457	62.9652
	1458	1458	267.104	268	1458	62.8413
	1459	1459	267.275	268.167	1459	62.7167
	1460	1460	267.449	268.333	1460	62.5922
	1461	1461	267.615	268.5	1461	62.4677
	1462	1462	267.787	268.667	1462	62.3432
	1463	1463			1442	64.6585
					1443	64.5372
					1444	64.4157
					1445	64.2942
					1446	64.1717
					1447	64.0494
					1448	63.9267
					1449	63.8039
					1450	63.6805
					1451	63.5572
					1452	63.4339
					1453	63.3105
					1454	63.1865
					1455	63.0624
					1456	62.9378
					1457	62.8129
					1458	62.6871
					1459	62.5615
					1460	62.4358
					1461	62.3101
					1462	62.1834
					1463	62.0567
					1464	61.9296
					1465	61.8024
					1466	61.6743
					1467	61.5465
					1468	61.4186
					1469	61.2907
					1470	61.162
					1471	61.0332
					1472	60.904
					1473	60.7747
					1474	60.6446
					1475	60.5148
					1476	60.3849
					1477	60.2548
					1478	60.1238
					1479	59.9928
					1480	59.8618
					1481	59.7308
					1482	59.5991
					1483	59.4677
					1484	59.3362
					1485	59.2046
					1486	59.0728
					1487	58.9403
					1488	58.8073
					1489	58.6739
					1490	58.5393
					1491	58.4051
					1492	58.2708
					1493	58.1363
					1494	58.001
					1495	57.8656
					1496	57.73
					1497	57.5941
					1498	57.4574
					1499	57.321
					1500	57.1847
					1501	57.0484
					1502	56.9116
					1503	56.7745
					1504	56.6371
					1505	56.4996
					1506	56.3616
					1507	56.2231
					1508	56.0848
					1509	55.9466
					1510	55.8073
					1511	55.6688
					1512	55.5297
					1513	55.3901
					1514	55.2494
					1515	55.1089
					1516	54.9685
					1517	54.828
					1518	54.6875
					1519	54.5468
					1520	54.4057
					1521	54.2642
					1522	54.1222
					1523	53.9797
					1524	53.8372
					1525	53.6947
					1526	53.5521
					1527	53.4082
					1528	53.2644
					1529	53.1206
					1530	52.9766
					1531	52.8318
					1532	52.6875
					1533	52.5432
					1534	52.3989
					1535	52.2542
					1536	52.109
					1537	51.9635
					1538	51.8177
					1539	51.671
					1540	51.5248
					1541	51.3787
					1542	51.2325
					1543	51.086
					1544	50.9395
					1545	50.793
					1546	50.6464
					1547	50.4987
					1548	50.3509
					1549	50.2029
					1550	50.0548
					1551	49.9058
					1552	49.7575
					1553	49.6091
					1554	49.4605
					1555	49.3114
					1556	49.1617
					1557	49.0118
					1558	48.8617
					1559	48.7103
					1560	48.5596
					1561	48.4086
					1562	48.2574
					1563	48.1061
					1564	47.9546
					1565	47.803
					1566	47.6513
					1567	47.4992
					1568	47.3475
					1569	47.1957
					1570	47.0437
					1571	46.891
					1572	46.738
					1573	46.5848
					1574	46.4316
					1575	46.2777
					1576	46.1237
					1577	45.9698
					1578	45.8157
					1579	45.661
					1580	45.5065
					1581	45.3519
					1582	45.1976
					1583	45.0432
					1584	44.8891
					1585	44.7348
					1586	44.5802
					1587	44.4256
					1588	44.2709
					1589	44.1157
					1590	43.9598
					1591	43.8035
					1592	43.646
					1593	43.489
					1594	43.3321
					1595	43.1752
					1596	43.0174
					1597	42.8596
					1598	42.7017
					1599	42.5437
					1600	42.3854
					1601	42.2274
					1602	42.0695
					1603	41.9118
					1604	41.7541
					1605	41.5957
					1606	41.437
					1607	41.2782
					1608	41.1188
					1609	40.9598
					1610	40.8009
					1611	40.6421
					1612	40.4833
					1613	40.3239
					1614	40.1642
					1615	40.0045
					1616	39.8442
					1617	39.6842
					1618	39.5243
					1619	39.3644
					1620	39.204
					1621	39.0432
					1622	38.8824
					1623	38.7216
					1624	38.5601
					1625	38.399
					1626	38.2381
					1627	38.0773
					1628	37.9168
					1629	37.756
					1630	37.5952
					1631	37.4341
					1632	37.2724
					1633	37.1109
					1634	36.9493
					1635	36.7877
					1636	36.6254
					1637	36.4636
					1638	36.3018
					1639	36.1399
					1640	35.9777
					1641	35.8152
					1642	35.6526
					1643	35.49
					1644	35.3268
					1645	35.1641
					1646	35.0015
					1647	34.839
					1648	34.6769
					1649	34.5141
					1650	34.3511
					1651	34.1879
					1652	34.0242
					1653	33.8606
					1654	33.6971
					1655	33.5336
					1656	33.3694
					1657	33.2054
					1658	33.0416
					1659	32.8778
					1660	32.7139
					1661	32.5504
					1662	32.387
					1663	32.2237
					1664	32.061
					1665	31.8978
					1666	31.7343
					1667	31.5705
					1668	31.4067
					1669	31.2425
					1670	31.0786
					1671	30.9148
					1672	30.7513
					1673	30.5881
					1674	30.4245
					1675	30.2606
					1676	30.0965
					1677	29.9325
					1678	29.7686
					1679	29.6047
					1680	29.441
					1681	29.2775
					1682	29.1142
					1683	28.9508
					1684	28.7873
					1685	28.6238
					1686	28.4601
					1687	28.2964
					1688	28.1327
					1689	27.9687
					1690	27.805
					1691	27.6417
					1692	27.4785
					1693	27.3159
					1694	27.1526
					1695	26.9889
					1696	26.8253
					1697	26.6616
					1698	26.4981
					1699	26.3349
					1700	26.1717
					1701	26.0089
					1702	25.8461
					1703	25.683
					1704	25.5197
					1705	25.3566
					1706	25.1934
					1707	25.0306
					1708	24.8678
					1709	24.7053
					1710	24.5432
					1711	24.3809
					1712	24.2184
					1713	24.0566
					1714	23.8945
					1715	23.7326
					1716	23.571
					1717	23.4093
					1718	23.2479
					1719	23.0867
					1720	22.9255
					1721	22.7647
					1722	22.6037
					1723	22.4428
					1724	22.2821
					1725	22.1216
					1726	21.9614
					1727	21.8013
					1728	21.6413
					1729	21.4823
					1730	21.3227
					1731	21.1629
					1732	21.0032
					1733	20.8438
					1734	20.6847
					1735	20.5259
					1736	20.3674
					1737	20.2098
					1738	20.0525
					1739	19.8951
					1740	19.7376
					1741	19.5804
					1742	19.4229
					1743	19.2656
					1744	19.1085
					1745	18.9521
					1746	18.7957
					1747	18.6397
					1748	18.4837
					1749	18.3276
					1750	18.1725
					1751	18.0172
					1752	17.862
					1753	17.707
					1754	17.5527
					1755	17.3988
					1756	17.2454
					1757	17.0921
					1758	16.9404
					1759	16.7878
					1760	16.6352
					1761	16.4827
					1762	16.3306
					1763	16.1789
					1764	16.0274
					1765	15.876
					1766	15.7253
					1767	15.5747
					1768	15.4243
					1769	15.2742
					1770	15.1253
					1771	14.9766
					1772	14.8284
					1773	14.6804
					1774	14.5346
					1775	14.3882
					1776	14.2418
					1777	14.0954
					1778	13.9502
					1779	13.8049
					1780	13.66
					1781	13.5153
					1782	13.3721
					1783	13.2291
					1784	13.0864
					1785	12.9438
					1786	12.8026
					1787	12.661
					1788	12.5198
					1789	12.3788
					1790	12.239
					1791	12.0996
					1792	11.9608
					1793	11.8223
					1794	11.6858
					1795	11.5484
					1796	11.411
					1797	11.274
					1798	11.1382
					1799	11.0027
					1800	10.8681
					1801	10.734
					1802	10.6023
					1803	10.4701
					1804	10.338
					1805	10.2061
					1806	10.0764
					1807	9.9464
					1808	9.81684
					1809	9.68779
					1810	9.56107
					1811	9.43408
					1812	9.30731
					1813	9.18063
					1814	9.0562
					1815	8.93151
					1816	8.80731
					1817	8.68381
					1818	8.56067
					1819	8.44053
					1820	8.32024
					1821	8.20049
					1822	8.08125
					1823	7.96408
					1824	7.84649
					1825	7.72952
					1826	7.6126
					1827	7.49865
					1828	7.38466
					1829	7.27149
					1830	7.15899
					1831	7.05006
					1832	6.94009
					1833	6.83032
					1834	6.721
					1835	6.61443
					1836	6.50765
					1837	6.40155
					1838	6.29607
					1839	6.19368
					1840	6.09103
					1841	5.98914
					1842	5.88794
					1843	5.79005
					1844	5.6913
					1845	5.59311
					1846	5.49566
					1847	5.40101
					1848	5.30605
					1849	5.21185
					1850	5.11841
					1851	5.02809
					1852	4.93728
					1853	4.84738
					1854	4.7583
					1855	4.67287
					1856	4.58722
					1857	4.50251
					1858	4.41863
					1859	4.33932
					1860	4.25927
					1861	4.17986
					1862	4.10102
					1863	4.0257
					1864	3.94987
					1865	3.87502
					1866	3.80102
					1867	3.7306
					1868	3.66031
					1869	3.59111
					1870	3.52273
					1871	3.4588
					1872	3.39393
					1873	3.33001
					1874	3.26697
					1875	3.20793
					1876	3.14885
					1877	3.09088
					1878	3.03382
					1879	2.98202
					1880	2.92937
					1881	2.87733
					1882	2.82576
					1883	2.7783
					1884	2.73011
					1885	2.68269
					1886	2.63606
					1887	2.5932
					1888	2.55029
					1889	2.50826
					1890	2.46685
					1891	2.42944
					1892	2.39107
					1893	2.35343
					1894	2.31656
					1895	2.2828
					1896	2.24892
					1897	2.21586
					1898	2.18346
					1899	2.15408
					1900	2.12436
					1901	2.09482
					1902	2.06578
					1903	2.03954
					1904	2.01241
					1905	1.98637
					1906	1.96102
					1907	1.93828
					1908	1.91523
					1909	1.89212
					1910	1.86963
					1911	1.84769
					1912	1.82755
					1913	1.80744
					1914	1.78798
					1915	1.769
					1916	1.75248
					1917	1.73541
					1918	1.7185
					1919	1.70168
					1920	1.68624
					1921	1.67052
					1922	1.65512
					1923	1.6401
					1924	1.62644
					1925	1.61306
					1926	1.60019
					1927	1.58766
					1928	1.57674
					1929	1.56488
					1930	1.55316
					1931	1.54164
					1932	1.53059
					1933	1.51999
					1934	1.50985
					1935	1.49997
					1936	1.49139
					1937	1.48202
					1938	1.47255
					1939	1.46324
					1940	1.45454
					1941	1.44608
					1942	1.43801
					1943	1.4302
					1944	1.4236
					1945	1.41681
					1946	1.41022
					1947	1.40376
					1948	1.39759
					1949	1.39106
					1950	1.38462
					1951	1.37829
					1952	1.37203
					1953	1.36621
					1954	1.36082
					1955	1.3556
					1956	1.35167
					1957	1.3474
					1958	1.34293
					1959	1.33834
					1960	1.33384
					1961	1.32916
					1962	1.32471
					1963	1.32041
					1964	1.31583
					1965	1.31179
					1966	1.30806
					1967	1.30444
					1968	1.30111
					1969	1.29816
[truncated: 1,481 more rows]

## Sheet: B10
Title	20.08.2018	12:33:00
________________________________________________________________________________
Title
Evaluation	Categories:
Curve	Name:
	!10%-25..600C	10K	N2	50ML	AL100	BLANK	20.08.2018	12:33:38
Curve	Values:
	Index	t	Ts	Tr	x	value	y	value
	[s]	[°C]	[°C]	[s]	[%]
	0	0	25.1199	25	0	99.9978
	1	1	25.1174	25.1667	1	99.996
	2	2	25.1514	25.3333	2	99.9934
	3	3	25.2087	25.5	3	99.9899
	4	4	25.2836	25.6667	4	99.9841
	5	5	25.3826	25.8333	5	99.9725
	6	6	25.4717	26	6	99.9593
	7	7	25.5582	26.1667	7	99.9461
	8	8	25.67	26.3333	8	99.9395
	9	9	25.7751	26.5	9	99.9349
	10	10	25.8917	26.6667	10	99.9309
	11	11	26.0191	26.8333	11	99.9278
	12	12	26.1586	27	12	99.9257
	13	13	26.2699	27.1667	13	99.9213
	14	14	26.4093	27.3333	14	99.9171
	15	15	26.5336	27.5	15	99.9226
	16	16	26.6739	27.6667	16	99.9222
	17	17	26.8045	27.8333	17	99.9221
	18	18	26.9382	28	18	99.9225
	19	19	27.0741	28.1667	19	99.9233
	20	20	27.2115	28.3333	20	99.9239
	21	21	27.3557	28.5	21	99.9245
	22	22	27.5043	28.6667	22	99.925
	23	23	27.6479	28.8333	23	99.9255
	24	24	27.7827	29	24	99.926
	25	25	27.9282	29.1667	25	99.9265
	26	26	28.0531	29.3333	26	99.9269
	27	27	28.2006	29.5	27	99.9274
	28	28	28.3352	29.6667	28	99.9279
	29	29	28.476	29.8333	29	99.9284
	30	30	28.6284	30	30	99.9287
	31	31	28.774	30.1667	31	99.929
	32	32	28.9035	30.3333	32	99.9292
	33	33	29.0553	30.5	33	99.9294
	34	34	29.1948	30.6667	34	99.93
	35	35	29.3307	30.8333	35	99.9307
	36	36	29.4717	31	36	99.9311
	37	37	29.6185	31.1667	37	99.9315
	38	38	29.7316	31.3333	38	99.9315
	39	39	29.8782	31.5	39	99.9316
	40	40	30.0268	31.6667	40	99.932
	41	41	30.1569	31.8333	41	99.9323
	42	42	30.2931	32	42	99.9326
	43	43	30.4255	32.1667	43	99.9329
	44	44	30.5658	32.3333	44	99.9334
	45	45	30.7046	32.5	45	99.9338
	46	46	30.8395	32.6667	46	99.934
	47	47	30.9778	32.8333	47	99.934
	48	48	31.1124	33	48	99.9338
	49	49	31.2472	33.1667	49	99.9337
	50	50	31.3853	33.3333	50	99.9334
	51	51	31.5179	33.5	51	99.9329
	52	52	31.6514	33.6667	52	99.9321
	53	53	31.7956	33.8333	53	99.9314
	54	54	31.9173	34	54	99.9306
	55	55	32.0539	34.1667	55	99.9298
	56	56	32.1912	34.3333	56	99.9288
	57	57	32.3254	34.5	57	99.9277
	58	58	32.4621	34.6667	58	99.9268
	59	59	32.5917	34.8333	59	99.9259
	60	60	32.7292	35	60	99.9246
	61	61	32.8537	35.1667	61	99.9235
	62	62	33.0113	35.3333	62	99.9224
	63	63	33.138	35.5	63	99.9213
	64	64	33.2878	35.6667	64	99.9201
	65	65	33.4083	35.8333	65	99.9191
	66	66	33.5367	36	66	99.9179
	67	67	33.6777	36.1667	67	99.9167
	68	68	33.8086	36.3333	68	99.9159
	69	69	33.9423	36.5	69	99.9149
	70	70	34.0699	36.6667	70	99.914
	71	71	34.2044	36.8333	71	99.913
	72	72	34.3545	37	72	99.9121
	73	73	34.4843	37.1667	73	99.9111
	74	74	34.6202	37.3333	74	99.9101
	75	75	34.7543	37.5	75	99.9092
	76	76	34.8902	37.6667	76	99.9082
	77	77	35.021	37.8333	77	99.9073
	78	78	35.1559	38	78	99.9065
	79	79	35.2981	38.1667	79	99.9056
	80	80	35.4368	38.3333	80	99.9044
	81	81	35.5711	38.5	81	99.9034
	82	82	35.7064	38.6667	82	99.9023
	83	83	35.8252	38.8333	83	99.9012
	84	84	35.9669	39	84	99.9002
	85	85	36.1132	39.1667	85	99.8989
	86	86	36.2487	39.3333	86	99.8978
	87	87	36.3867	39.5	87	99.8967
	88	88	36.5371	39.6667	88	99.8957
	89	89	36.6689	39.8333	89	99.8948
	90	90	36.8054	40	90	99.8939
	91	91	36.9454	40.1667	91	99.8931
	92	92	37.0873	40.3333	92	99.8926
	93	93	37.2169	40.5	93	99.8921
	94	94	37.3518	40.6667	94	99.8917
	95	95	37.4859	40.8333	95	99.8913
	96	96	37.6251	41	96	99.8909
	97	97	37.7573	41.1667	97	99.8907
	98	98	37.9014	41.3333	98	99.8904
	99	99	38.0349	41.5	99	99.89
	100	100	38.18	41.6667	100	99.8896
	101	101	38.3119	41.8333	101	99.8892
	102	102	38.4482	42	102	99.8887
	103	103	38.5985	42.1667	103	99.8883
	104	104	38.722	42.3333	104	99.8879
	105	105	38.8646	42.5	105	99.8878
	106	106	39.0189	42.6667	106	99.8875
	107	107	39.1535	42.8333	107	99.887
	108	108	39.2968	43	108	99.8865
	109	109	39.4429	43.1667	109	99.8861
	110	110	39.5682	43.3333	110	99.8857
	111	111	39.717	43.5	111	99.8854
	112	112	39.8494	43.6667	112	99.8851
	113	113	39.9806	43.8333	113	99.8848
	114	114	40.1333	44	114	99.8845
	115	115	40.2747	44.1667	115	99.8841
	116	116	40.413	44.3333	116	99.8838
	117	117	40.5537	44.5	117	99.8835
	118	118	40.7012	44.6667	118	99.8832
	119	119	40.8373	44.8333	119	99.883
	120	120	40.973	45	120	99.8828
	121	121	41.1257	45.1667	121	99.8828
	122	122	41.2659	45.3333	122	99.8827
	123	123	41.3989	45.5	123	99.8825
	124	124	41.5485	45.6667	124	99.8824
	125	125	41.6668	45.8333	125	99.8826
	126	126	41.8246	46	126	99.8827
	127	127	41.97	46.1667	127	99.8829
	128	128	42.1234	46.3333	128	99.883
	129	129	42.2626	46.5	129	99.8832
	130	130	42.4014	46.6667	130	99.8834
	131	131	42.5463	46.8333	131	99.8834
	132	132	42.6824	47	132	99.8834
	133	133	42.8384	47.1667	133	99.8832
	134	134	42.9802	47.3333	134	99.883
	135	135	43.1202	47.5	135	99.8828
	136	136	43.26	47.6667	136	99.8827
	137	137	43.4175	47.8333	137	99.8825
	138	138	43.5418	48	138	99.8825
	139	139	43.698	48.1667	139	99.8827
	140	140	43.8354	48.3333	140	99.8826
	141	141	43.9799	48.5	141	99.883
	142	142	44.1379	48.6667	142	99.8831
	143	143	44.2807	48.8333	143	99.8831
	144	144	44.4318	49	144	99.8832
	145	145	44.5723	49.1667	145	99.8835
	146	146	44.7257	49.3333	146	99.8836
	147	147	44.8587	49.5	147	99.8839
	148	148	45.0024	49.6667	148	99.8844
	149	149	45.1603	49.8333	149	99.8848
	150	150	45.2989	50	150	99.8851
	151	151	45.4404	50.1667	151	99.8854
	152	152	45.5884	50.3333	152	99.8856
	153	153	45.7385	50.5	153	99.8856
	154	154	45.8825	50.6667	154	99.8856
	155	155	46.0317	50.8333	155	99.8856
	156	156	46.1854	51	156	99.8856
	157	157	46.3225	51.1667	157	99.8853
	158	158	46.4783	51.3333	158	99.885
	159	159	46.6265	51.5	159	99.8848
	160	160	46.7843	51.6667	160	99.8848
	161	161	46.925	51.8333	161	99.8845
	162	162	47.0652	52	162	99.8845
	163	163	47.2191	52.1667	163	99.8844
	164	164	47.369	52.3333	164	99.8843
	165	165	47.5178	52.5	165	99.8843
	166	166	47.6734	52.6667	166	99.8846
	167	167	47.8211	52.8333	167	99.8846
	168	168	47.97	53	168	99.8845
	169	169	48.1209	53.1667	169	99.8847
	170	170	48.2676	53.3333	170	99.8844
	171	171	48.4236	53.5	171	99.8842
	172	172	48.5708	53.6667	172	99.8841
	173	173	48.727	53.8333	173	99.8839
	174	174	48.8667	54	174	99.8834
	175	175	49.0212	54.1667	175	99.8834
	176	176	49.1654	54.3333	176	99.8834
	177	177	49.3092	54.5	177	99.8832
	178	178	49.4652	54.6667	178	99.8836
	179	179	49.6075	54.8333	179	99.8838
	180	180	49.7734	55	180	99.8837
	181	181	49.9225	55.1667	181	99.8836
	182	182	50.0718	55.3333	182	99.8839
	183	183	50.2202	55.5	183	99.884
	184	184	50.3801	55.6667	184	99.884
	185	185	50.5273	55.8333	185	99.8843
	186	186	50.6746	56	186	99.8844
	187	187	50.8344	56.1667	187	99.8843
	188	188	50.9774	56.3333	188	99.8843
	189	189	51.1281	56.5	189	99.8846
	190	190	51.2876	56.6667	190	99.8841
	191	191	51.4439	56.8333	191	99.8839
	192	192	51.602	57	192	99.8839
	193	193	51.7401	57.1667	193	99.8839
	194	194	51.9062	57.3333	194	99.8836
	195	195	52.0504	57.5	195	99.8836
	196	196	52.2081	57.6667	196	99.8835
	197	197	52.36	57.8333	197	99.8832
	198	198	52.5038	58	198	99.8831
	199	199	52.6684	58.1667	199	99.8832
	200	200	52.8257	58.3333	200	99.8832
	201	201	52.9789	58.5	201	99.8831
	202	202	53.1216	58.6667	202	99.8836
	203	203	53.2807	58.8333	203	99.8839
	204	204	53.428	59	204	99.8838
	205	205	53.5808	59.1667	205	99.8838
	206	206	53.7351	59.3333	206	99.8842
	207	207	53.8882	59.5	207	99.8843
	208	208	54.0455	59.6667	208	99.8842
	209	209	54.1881	59.8333	209	99.8841
	210	210	54.3449	60	210	99.8845
	211	211	54.506	60.1667	211	99.8845
	212	212	54.6571	60.3333	212	99.8844
	213	213	54.8149	60.5	213	99.8845
	214	214	54.9702	60.6667	214	99.8844
	215	215	55.1213	60.8333	215	99.884
	216	216	55.2792	61	216	99.8839
	217	217	55.4364	61.1667	217	99.8839
	218	218	55.5906	61.3333	218	99.8834
	219	219	55.7369	61.5	219	99.8829
	220	220	55.898	61.6667	220	99.8828
	221	221	56.0421	61.8333	221	99.8831
	222	222	56.1903	62	222	99.883
	223	223	56.3549	62.1667	223	99.8829
	224	224	56.5092	62.3333	224	99.8831
	225	225	56.675	62.5	225	99.8832
	226	226	56.8228	62.6667	226	99.8828
	227	227	56.9824	62.8333	227	99.8826
	228	228	57.1363	63	228	99.8826
	229	229	57.2961	63.1667	229	99.8825
	230	230	57.4476	63.3333	230	99.8818
	231	231	57.612	63.5	231	99.8817
	232	232	57.7741	63.6667	232	99.8818
	233	233	57.9211	63.8333	233	99.8817
	234	234	58.0853	64	234	99.8815
	235	235	58.2489	64.1667	235	99.8816
	236	236	58.403	64.3333	236	99.8816
	237	237	58.5687	64.5	237	99.8813
	238	238	58.7205	64.6667	238	99.8811
	239	239	58.8741	64.8333	239	99.8809
	240	240	59.0372	65	240	99.8807
	241	241	59.2025	65.1667	241	99.8804
	242	242	59.346	65.3333	242	99.8803
	243	243	59.4983	65.5	243	99.8801
	244	244	59.6601	65.6667	244	99.8799
	245	245	59.8138	65.8333	245	99.8796
	246	246	59.9754	66	246	99.8795
	247	247	60.1289	66.1667	247	99.8792
	248	248	60.2932	66.3333	248	99.8791
	249	249	60.4579	66.5	249	99.8791
	250	250	60.6121	66.6667	250	99.8793
	251	251	60.766	66.8333	251	99.8798
	252	252	60.933	67	252	99.88
	253	253	61.0869	67.1667	253	99.8803
	254	254	61.2555	67.3333	254	99.8807
	255	255	61.4085	67.5	255	99.8811
	256	256	61.5651	67.6667	256	99.8816
	257	257	61.7253	67.8333	257	99.8821
	258	258	61.8877	68	258	99.8826
	259	259	62.0497	68.1667	259	99.883
	260	260	62.2066	68.3333	260	99.8837
	261	261	62.3716	68.5	261	99.8845
	262	262	62.5467	68.6667	262	99.8852
	263	263	62.7025	68.8333	263	99.8861
	264	264	62.8689	69	264	99.887
	265	265	63.0268	69.1667	265	99.888
	266	266	63.1878	69.3333	266	99.8887
	267	267	63.3615	69.5	267	99.8896
	268	268	63.5247	69.6667	268	99.8907
	269	269	63.6781	69.8333	269	99.8914
	270	270	63.8464	70	270	99.8919
	271	271	64.0081	70.1667	271	99.8928
	272	272	64.1807	70.3333	272	99.8935
	273	273	64.3449	70.5	273	99.8941
	274	274	64.5026	70.6667	274	99.8946
	275	275	64.6788	70.8333	275	99.8952
	276	276	64.8447	71	276	99.8958
	277	277	65.0029	71.1667	277	99.8963
	278	278	65.1608	71.3333	278	99.8967
	279	279	65.3456	71.5	279	99.897
	280	280	65.5166	71.6667	280	99.8972
	281	281	65.6747	71.8333	281	99.8973
	282	282	65.8421	72	282	99.8973
	283	283	66.0069	72.1667	283	99.8972
	284	284	66.1869	72.3333	284	99.8973
	285	285	66.3549	72.5	285	99.8974
	286	286	66.5309	72.6667	286	99.8974
	287	287	66.6923	72.8333	287	99.898
	288	288	66.8458	73	288	99.8983
	289	289	67.0237	73.1667	289	99.8984
	290	290	67.1884	73.3333	290	99.8985
	291	291	67.3588	73.5	291	99.8988
	292	292	67.5236	73.6667	292	99.8989
	293	293	67.6909	73.8333	293	99.8988
	294	294	67.8694	74	294	99.8987
	295	295	68.0398	74.1667	295	99.8987
	296	296	68.2038	74.3333	296	99.8988
	297	297	68.3856	74.5	297	99.8987
	298	298	68.558	74.6667	298	99.8986
	299	299	68.7251	74.8333	299	99.8985
	300	300	68.8832	75	300	99.8983
	301	301	69.0606	75.1667	301	99.8981
	302	302	69.2354	75.3333	302	99.8978
	303	303	69.4028	75.5	303	99.8969
	304	304	69.5605	75.6667	304	99.8965
	305	305	69.732	75.8333	305	99.8964
	306	306	69.9172	76	306	99.8962
	307	307	70.0779	76.1667	307	99.8958
	308	308	70.2503	76.3333	308	99.8951
	309	309	70.4245	76.5	309	99.8947
	310	310	70.6045	76.6667	310	99.8945
	311	311	70.7709	76.8333	311	99.8945
	312	312	70.9362	77	312	99.8936
	313	313	71.1002	77.1667	313	99.8929
	314	314	71.2714	77.3333	314	99.8925
	315	315	71.4448	77.5	315	99.8925
	316	316	71.6138	77.6667	316	99.8926
	317	317	71.7817	77.8333	317	99.8925
	318	318	71.9554	78	318	99.8922
	319	319	72.1245	78.1667	319	99.892
	320	320	72.3042	78.3333	320	99.8913
	321	321	72.4779	78.5	321	99.8906
	322	322	72.6419	78.6667	322	99.89
	323	323	72.8202	78.8333	323	99.8886
	324	324	72.9947	79	324	99.8872
	325	325	73.165	79.1667	325	99.8858
	326	326	73.3325	79.3333	326	99.8846
	327	327	73.499	79.5	327	99.8838
	328	328	73.6749	79.6667	328	99.8835
	329	329	73.8423	79.8333	329	99.8831
	330	330	74.0168	80	330	99.8825
	331	331	74.1867	80.1667	331	99.8819
	332	332	74.3673	80.3333	332	99.882
	333	333	74.5363	80.5	333	99.8815
	334	334	74.7048	80.6667	334	99.8811
	335	335	74.8785	80.8333	335	99.8807
	336	336	75.044	81	336	99.8797
	337	337	75.2188	81.1667	337	99.8788
	338	338	75.3834	81.3333	338	99.8779
	339	339	75.5543	81.5	339	99.877
	340	340	75.7287	81.6667	340	99.8768
	341	341	75.9101	81.8333	341	99.8762
	342	342	76.0698	82	342	99.8753
	343	343	76.2412	82.1667	343	99.8741
	344	344	76.4139	82.3333	344	99.8726
	345	345	76.5914	82.5	345	99.8709
	346	346	76.761	82.6667	346	99.8695
	347	347	76.9262	82.8333	347	99.8684
	348	348	77.1045	83	348	99.8671
	349	349	77.2798	83.1667	349	99.8663
	350	350	77.4447	83.3333	350	99.8654
	351	351	77.6278	83.5	351	99.8645
	352	352	77.8028	83.6667	352	99.8645
	353	353	77.974	83.8333	353	99.8635
	354	354	78.1498	84	354	99.8622
	355	355	78.3073	84.1667	355	99.8609
	356	356	78.4717	84.3333	356	99.8596
	357	357	78.6449	84.5	357	99.8586
	358	358	78.8251	84.6667	358	99.8576
	359	359	78.9913	84.8333	359	99.8564
	360	360	79.1657	85	360	99.856
	361	361	79.332	85.1667	361	99.8552
	362	362	79.5141	85.3333	362	99.8539
	363	363	79.6874	85.5	363	99.8523
	364	364	79.8518	85.6667	364	99.8504
	365	365	80.0143	85.8333	365	99.8492
	366	366	80.1785	86	366	99.8483
	367	367	80.3551	86.1667	367	99.8472
	368	368	80.5319	86.3333	368	99.8464
	369	369	80.7109	86.5	369	99.8455
	370	370	80.8899	86.6667	370	99.8444
	371	371	81.0517	86.8333	371	99.8431
	372	372	81.2267	87	372	99.8413
	373	373	81.3964	87.1667	373	99.8397
	374	374	81.5636	87.3333	374	99.8382
	375	375	81.7394	87.5	375	99.8366
	376	376	81.9164	87.6667	376	99.8349
	377	377	82.0762	87.8333	377	99.8337
	378	378	82.2475	88	378	99.8327
	379	379	82.4201	88.1667	379	99.8316
	380	380	82.5855	88.3333	380	99.8307
	381	381	82.7687	88.5	381	99.8294
	382	382	82.9393	88.6667	382	99.8282
	383	383	83.0953	88.8333	383	99.8269
	384	384	83.2703	89	384	99.8248
	385	385	83.4383	89.1667	385	99.8231
	386	386	83.6045	89.3333	386	99.822
	387	387	83.7802	89.5	387	99.8212
	388	388	83.9571	89.6667	388	99.8204
	389	389	84.1287	89.8333	389	99.8194
	390	390	84.291	90	390	99.8184
	391	391	84.4694	90.1667	391	99.8174
	392	392	84.6435	90.3333	392	99.8164
	393	393	84.8121	90.5	393	99.8151
	394	394	84.9867	90.6667	394	99.8135
	395	395	85.1551	90.8333	395	99.8119
	396	396	85.3258	91	396	99.8105
	397	397	85.5012	91.1667	397	99.8085
	398	398	85.6757	91.3333	398	99.8071
	399	399	85.8375	91.5	399	99.806
	400	400	86.0085	91.6667	400	99.805
	401	401	86.184	91.8333	401	99.8047
	402	402	86.3552	92	402	99.8037
	403	403	86.5256	92.1667	403	99.8025
	404	404	86.7069	92.3333	404	99.8013
	405	405	86.8791	92.5	405	99.7999
	406	406	87.0521	92.6667	406	99.7984
	407	407	87.2197	92.8333	407	99.7967
	408	408	87.3881	93	408	99.7949
	409	409	87.5673	93.1667	409	99.7931
	410	410	87.7371	93.3333	410	99.7914
	411	411	87.906	93.5	411	99.7898
	412	412	88.0742	93.6667	412	99.7884
	413	413	88.2426	93.8333	413	99.7875
	414	414	88.4097	94	414	99.7867
	415	415	88.5936	94.1667	415	99.7859
	416	416	88.7605	94.3333	416	99.785
	417	417	88.9308	94.5	417	99.7841
	418	418	89.1044	94.6667	418	99.7829
	419	419	89.2684	94.8333	419	99.7813
	420	420	89.443	95	420	99.7794
	421	421	89.6163	95.1667	421	99.7766
	422	422	89.8001	95.3333	422	99.7744
	423	423	89.9676	95.5	423	99.7721
	424	424	90.1333	95.6667	424	99.7696
	425	425	90.3068	95.8333	425	99.7672
	426	426	90.4776	96	426	99.7648
	427	427	90.6472	96.1667	427	99.7623
	428	428	90.8186	96.3333	428	99.7597
	429	429	90.9806	96.5	429	99.7574
	430	430	91.1628	96.6667	430	99.7558
	431	431	91.3446	96.8333	431	99.7547
	432	432	91.5166	97	432	99.754
	433	433	91.6847	97.1667	433	99.7539
	434	434	91.8559	97.3333	434	99.7531
	435	435	92.0181	97.5	435	99.7523
	436	436	92.1847	97.6667	436	99.7515
	437	437	92.3583	97.8333	437	99.7501
	438	438	92.5442	98	438	99.7485
	439	439	92.7014	98.1667	439	99.7469
	440	440	92.8686	98.3333	440	99.7454
	441	441	93.0474	98.5	441	99.7432
	442	442	93.2244	98.6667	442	99.7411
	443	443	93.3965	98.8333	443	99.739
	444	444	93.5679	99	444	99.737
	445	445	93.7311	99.1667	445	99.7352
	446	446	93.9037	99.3333	446	99.7332
	447	447	94.0854	99.5	447	99.7311
	448	448	94.2582	99.6667	448	99.729
	449	449	94.4178	99.8333	449	99.7272
	450	450	94.5916	100	450	99.7255
	451	451	94.7597	100.167	451	99.7237
	452	452	94.9298	100.333	452	99.7216
	453	453	95.1023	100.5	453	99.7198
	454	454	95.2626	100.667	454	99.7181
	455	455	95.431	100.833	455	99.7164
	456	456	95.5995	101	456	99.7147
	457	457	95.7785	101.167	457	99.7126
	458	458	95.9581	101.333	458	99.7105
	459	459	96.1249	101.5	459	99.7086
	460	460	96.3011	101.667	460	99.7068
	461	461	96.4707	101.833	461	99.7044
	462	462	96.6441	102	462	99.7021
	463	463	96.8288	102.167	463	99.7001
	464	464	96.9819	102.333	464	99.6982
	465	465	97.1513	102.5	465	99.6961
	466	466	97.3256	102.667	466	99.6939
	467	467	97.488	102.833	467	99.6918
	468	468	97.6661	103	468	99.6898
	469	469	97.8392	103.167	469	99.688
	470	470	98.0144	103.333	470	99.6859
	471	471	98.1835	103.5	471	99.6837
	472	472	98.3557	103.667	472	99.6816
	473	473	98.522	103.833	473	99.6798
	474	474	98.697	104	474	99.6777
	475	475	98.8656	104.167	475	99.6755
	476	476	99.0365	104.333	476	99.6733
	477	477	99.2044	104.5	477	99.6714
	478	478	99.3744	104.667	478	99.6696
	479	479	99.5462	104.833	479	99.6676
	480	480	99.7236	105	480	99.6654
	481	481	99.8903	105.167	481	99.6636
	482	482	100.06	105.333	482	99.6618
	483	483	100.238	105.5	483	99.6601
	484	484	100.408	105.667	484	99.6583
	485	485	100.575	105.833	485	99.6563
	486	486	100.748	106	486	99.6543
	487	487	100.914	106.167	487	99.6525
	488	488	101.09	106.333	488	99.6507
	489	489	101.266	106.5	489	99.6489
	490	490	101.43	106.667	490	99.6467
	491	491	101.605	106.833	491	99.6443
	492	492	101.773	107	492	99.6414
	493	493	101.95	107.167	493	99.6381
	494	494	102.126	107.333	494	99.6341
	495	495	102.294	107.5	495	99.6308
	496	496	102.466	107.667	496	99.6277
	497	497	102.635	107.833	497	99.6248
	498	498	102.807	108	498	99.622
	499	499	102.971	108.167	499	99.6193
	500	500	103.147	108.333	500	99.617
	501	501	103.328	108.5	501	99.6148
	502	502	103.483	108.667	502	99.613
	503	503	103.658	108.833	503	99.6108
	504	504	103.834	109	504	99.6086
	505	505	104.009	109.167	505	99.6065
	506	506	104.18	109.333	506	99.6046
	507	507	104.353	109.5	507	99.6024
	508	508	104.516	109.667	508	99.5997
	509	509	104.692	109.833	509	99.5967
	510	510	104.861	110	510	99.5937
	511	511	105.038	110.167	511	99.5909
	512	512	105.199	110.333	512	99.588
	513	513	105.364	110.5	513	99.585
	514	514	105.551	110.667	514	99.5822
	515	515	105.711	110.833	515	99.5797
	516	516	105.881	111	516	99.5774
	517	517	106.051	111.167	517	99.5752
	518	518	106.237	111.333	518	99.5732
	519	519	106.399	111.5	519	99.5709
	520	520	106.56	111.667	520	99.5685
	521	521	106.745	111.833	521	99.5659
	522	522	106.902	112	522	99.5626
	523	523	107.078	112.167	523	99.5594
	524	524	107.267	112.333	524	99.5564
	525	525	107.431	112.5	525	99.5535
	526	526	107.604	112.667	526	99.5507
	527	527	107.772	112.833	527	99.5481
	528	528	107.934	113	528	99.5455
	529	529	108.111	113.167	529	99.543
	530	530	108.289	113.333	530	99.5414
	531	531	108.45	113.5	531	99.5389
	532	532	108.633	113.667	532	99.5358
	533	533	108.796	113.833	533	99.5325
	534	534	108.965	114	534	99.5288
	535	535	109.132	114.167	535	99.5256
	536	536	109.312	114.333	536	99.5224
	537	537	109.487	114.5	537	99.5191
	538	538	109.659	114.667	538	99.516
	539	539	109.829	114.833	539	99.513
	540	540	110	115	540	99.5099
	541	541	110.185	115.167	541	99.5066
	542	542	110.343	115.333	542	99.5034
	543	543	110.525	115.5	543	99.5004
	544	544	110.688	115.667	544	99.4976
	545	545	110.86	115.833	545	99.495
	546	546	111.03	116	546	99.4923
	547	547	111.197	116.167	547	99.4891
	548	548	111.372	116.333	548	99.4857
	549	549	111.528	116.5	549	99.4824
	550	550	111.703	116.667	550	99.4794
	551	551	111.889	116.833	551	99.4767
	552	552	112.072	117	552	99.4743
	553	553	112.234	117.167	553	99.472
	554	554	112.395	117.333	554	99.4697
	555	555	112.57	117.5	555	99.4667
	556	556	112.734	117.667	556	99.4638
	557	557	112.913	117.833	557	99.461
	558	558	113.083	118	558	99.4584
	559	559	113.248	118.167	559	99.455
	560	560	113.427	118.333	560	99.4516
	561	561	113.588	118.5	561	99.4482
	562	562	113.766	118.667	562	99.4449
	563	563	113.939	118.833	563	99.4417
	564	564	114.104	119	564	99.438
	565	565	114.28	119.167	565	99.4339
	566	566	114.453	119.333	566	99.4299
	567	567	114.622	119.5	567	99.4254
	568	568	114.801	119.667	568	99.4212
	569	569	114.971	119.833	569	99.4171
	570	570	115.137	120	570	99.4132
	571	571	115.299	120.167	571	99.4091
	572	572	115.478	120.333	572	99.4051
	573	573	115.653	120.5	573	99.4012
	574	574	115.827	120.667	574	99.3975
	575	575	115.995	120.833	575	99.3941
	576	576	116.163	121	576	99.3903
	577	577	116.339	121.167	577	99.3864
	578	578	116.503	121.333	578	99.3824
	579	579	116.685	121.5	579	99.3789
	580	580	116.855	121.667	580	99.3751
	581	581	117.02	121.833	581	99.3713
	582	582	117.191	122	582	99.3674
	583	583	117.366	122.167	583	99.3636
	584	584	117.544	122.333	584	99.3597
	585	585	117.713	122.5	585	99.3557
	586	586	117.882	122.667	586	99.3517
	587	587	118.046	122.833	587	99.3474
	588	588	118.217	123	588	99.3434
	589	589	118.397	123.167	589	99.3394
	590	590	118.573	123.333	590	99.3351
	591	591	118.742	123.5	591	99.3307
	592	592	118.908	123.667	592	99.3265
	593	593	119.085	123.833	593	99.3223
	594	594	119.251	124	594	99.318
	595	595	119.429	124.167	595	99.314
	596	596	119.596	124.333	596	99.3105
	597	597	119.759	124.5	597	99.3068
	598	598	119.936	124.667	598	99.3028
	599	599	120.102	124.833	599	99.2994
	600	600	120.274	125	600	99.2957
	601	601	120.444	125.167	601	99.2916
	602	602	120.617	125.333	602	99.2872
	603	603	120.785	125.5	603	99.2823
	604	604	120.953	125.667	604	99.2779
	605	605	121.133	125.833	605	99.2735
	606	606	121.309	126	606	99.269
	607	607	121.473	126.167	607	99.2645
	608	608	121.647	126.333	608	99.2598
	609	609	121.817	126.5	609	99.2553
	610	610	121.98	126.667	610	99.2508
	611	611	122.158	126.833	611	99.2459
	612	612	122.321	127	612	99.241
	613	613	122.501	127.167	613	99.2362
	614	614	122.675	127.333	614	99.2319
	615	615	122.845	127.5	615	99.2283
	616	616	123.015	127.667	616	99.225
	617	617	123.19	127.833	617	99.222
	618	618	123.363	128	618	99.2189
	619	619	123.531	128.167	619	99.2165
	620	620	123.702	128.333	620	99.2133
	621	621	123.864	128.5	621	99.2096
	622	622	124.033	128.667	622	99.2055
	623	623	124.214	128.833	623	99.2
	624	624	124.386	129	624	99.1952
	625	625	124.56	129.167	625	99.1901
	626	626	124.728	129.333	626	99.1849
	627	627	124.904	129.5	627	99.1794
	628	628	125.074	129.667	628	99.174
	629	629	125.248	129.833	629	99.1685
	630	630	125.418	130	630	99.1628
	631	631	125.586	130.167	631	99.1571
	632	632	125.757	130.333	632	99.1514
	633	633	125.923	130.5	633	99.1457
	634	634	126.097	130.667	634	99.1399
	635	635	126.272	130.833	635	99.1345
	636	636	126.449	131	636	99.129
	637	637	126.619	131.167	637	99.1232
	638	638	126.778	131.333	638	99.1174
	639	639	126.954	131.5	639	99.1119
	640	640	127.128	131.667	640	99.1062
	641	641	127.293	131.833	641	99.1004
	642	642	127.472	132	642	99.0944
	643	643	127.643	132.167	643	99.089
	644	644	127.809	132.333	644	99.0835
	645	645	127.983	132.5	645	99.0781
	646	646	128.16	132.667	646	99.0727
	647	647	128.323	132.833	647	99.0672
	648	648	128.504	133	648	99.0619
	649	649	128.668	133.167	649	99.0568
	650	650	128.833	133.333	650	99.0517
	651	651	129.012	133.5	651	99.0467
	652	652	129.176	133.667	652	99.0413
	653	653	129.35	133.833	653	99.0357
	654	654	129.527	134	654	99.0302
	655	655	129.704	134.167	655	99.0247
	656	656	129.876	134.333	656	99.0187
	657	657	130.043	134.5	657	99.0128
	658	658	130.213	134.667	658	99.0068
	659	659	130.381	134.833	659	99.001
	660	660	130.561	135	660	98.9955
	661	661	130.725	135.167	661	98.99
	662	662	130.898	135.333	662	98.9843
	663	663	131.063	135.5	663	98.9785
	664	664	131.241	135.667	664	98.9729
	665	665	131.416	135.833	665	98.9673
	666	666	131.582	136	666	98.9616
	667	667	131.747	136.167	667	98.9557
	668	668	131.934	136.333	668	98.9494
	669	669	132.106	136.5	669	98.9434
	670	670	132.263	136.667	670	98.9375
	671	671	132.436	136.833	671	98.9318
	672	672	132.611	137	672	98.9256
	673	673	132.781	137.167	673	98.9194
	674	674	132.951	137.333	674	98.9132
	675	675	133.131	137.5	675	98.907
	676	676	133.297	137.667	676	98.901
	677	677	133.47	137.833	677	98.895
	678	678	133.647	138	678	98.8887
	679	679	133.812	138.167	679	98.8823
	680	680	133.979	138.333	680	98.8762
	681	681	134.153	138.5	681	98.87
	682	682	134.317	138.667	682	98.8636
	683	683	134.495	138.833	683	98.857
	684	684	134.66	139	684	98.8502
	685	685	134.837	139.167	685	98.8437
	686	686	135.005	139.333	686	98.8372
	687	687	135.179	139.5	687	98.8309
	688	688	135.344	139.667	688	98.8241
	689	689	135.523	139.833	689	98.8172
	690	690	135.689	140	690	98.8104
	691	691	135.863	140.167	691	98.8036
	692	692	136.041	140.333	692	98.7968
	693	693	136.218	140.5	693	98.7902
	694	694	136.382	140.667	694	98.7833
	695	695	136.561	140.833	695	98.7764
	696	696	136.726	141	696	98.77
	697	697	136.899	141.167	697	98.7635
	698	698	137.064	141.333	698	98.7571
	699	699	137.243	141.5	699	98.7508
	700	700	137.409	141.667	700	98.7444
	701	701	137.58	141.833	701	98.7375
	702	702	137.76	142	702	98.7306
	703	703	137.928	142.167	703	98.7238
	704	704	138.105	142.333	704	98.7168
	705	705	138.276	142.5	705	98.71
	706	706	138.453	142.667	706	98.7029
	707	707	138.623	142.833	707	98.6956
	708	708	138.786	143	708	98.6879
	709	709	138.957	143.167	709	98.6798
	710	710	139.13	143.333	710	98.6718
	711	711	139.296	143.5	711	98.6639
	712	712	139.461	143.667	712	98.6548
	713	713	139.639	143.833	713	98.6464
	714	714	139.82	144	714	98.6387
	715	715	139.981	144.167	715	98.6318
	716	716	140.149	144.333	716	98.6267
	717	717	140.329	144.5	717	98.6212
	718	718	140.499	144.667	718	98.6154
	719	719	140.671	144.833	719	98.6095
	720	720	140.832	145	720	98.6034
	721	721	141.012	145.167	721	98.5973
	722	722	141.18	145.333	722	98.5904
	723	723	141.354	145.5	723	98.583
	724	724	141.532	145.667	724	98.5753
	725	725	141.697	145.833	725	98.5657
	726	726	141.875	146	726	98.5571
	727	727	142.039	146.167	727	98.5488
	728	728	142.212	146.333	728	98.5407
	729	729	142.393	146.5	729	98.5327
	730	730	142.551	146.667	730	98.5247
	731	731	142.733	146.833	731	98.5164
	732	732	142.904	147	732	98.5081
	733	733	143.08	147.167	733	98.5
	734	734	143.251	147.333	734	98.4917
	735	735	143.418	147.5	735	98.4833
	736	736	143.592	147.667	736	98.4748
	737	737	143.762	147.833	737	98.4667
	738	738	143.919	148	738	98.4588
	739	739	144.099	148.167	739	98.4508
	740	740	144.27	148.333	740	98.4426
	741	741	144.448	148.5	741	98.4354
	742	742	144.616	148.667	742	98.4278
	743	743	144.78	148.833	743	98.4203
	744	744	144.955	149	744	98.4127
	745	745	145.129	149.167	745	98.4052
	746	746	145.296	149.333	746	98.3975
	747	747	145.465	149.5	747	98.3895
	748	748	145.638	149.667	748	98.3812
	749	749	145.815	149.833	749	98.3721
	750	750	145.994	150	750	98.3628
	751	751	146.16	150.167	751	98.3533
	752	752	146.327	150.333	752	98.3436
	753	753	146.502	150.5	753	98.3324
	754	754	146.672	150.667	754	98.3217
	755	755	146.842	150.833	755	98.311
	756	756	147.009	151	756	98.3004
	757	757	147.195	151.167	757	98.2899
	758	758	147.352	151.333	758	98.2796
	759	759	147.525	151.5	759	98.2693
	760	760	147.703	151.667	760	98.2589
	761	761	147.874	151.833	761	98.2494
	762	762	148.05	152	762	98.2397
	763	763	148.212	152.167	763	98.2301
	764	764	148.384	152.333	764	98.2204
	765	765	148.555	152.5	765	98.2106
	766	766	148.73	152.667	766	98.2008
	767	767	148.895	152.833	767	98.1913
	768	768	149.067	153	768	98.1818
	769	769	149.246	153.167	769	98.1722
	770	770	149.419	153.333	770	98.1623
	771	771	149.594	153.5	771	98.1523
	772	772	149.764	153.667	772	98.1423
	773	773	149.931	153.833	773	98.1325
	774	774	150.103	154	774	98.1227
	775	775	150.282	154.167	775	98.1129
	776	776	150.445	154.333	776	98.103
	777	777	150.629	154.5	777	98.0929
	778	778	150.79	154.667	778	98.0828
	779	779	150.959	154.833	779	98.0729
	780	780	151.13	155	780	98.063
	781	781	151.304	155.167	781	98.0523
	782	782	151.463	155.333	782	98.0418
	783	783	151.642	155.5	783	98.0314
	784	784	151.812	155.667	784	98.0211
	785	785	151.984	155.833	785	98.0108
	786	786	152.169	156	786	98.0006
	787	787	152.331	156.167	787	97.9901
	788	788	152.5	156.333	788	97.9795
	789	789	152.673	156.5	789	97.969
	790	790	152.85	156.667	790	97.9585
	791	791	153.022	156.833	791	97.9477
	792	792	153.196	157	792	97.9367
	793	793	153.371	157.167	793	97.9256
	794	794	153.534	157.333	794	97.9144
	795	795	153.706	157.5	795	97.9036
	796	796	153.87	157.667	796	97.8929
	797	797	154.047	157.833	797	97.8822
	798	798	154.23	158	798	97.8713
	799	799	154.406	158.167	799	97.8602
	800	800	154.578	158.333	800	97.8492
	801	801	154.745	158.5	801	97.8383
	802	802	154.915	158.667	802	97.8269
	803	803	155.093	158.833	803	97.8156
	804	804	155.261	159	804	97.8041
	805	805	155.435	159.167	805	97.7926
	806	806	155.605	159.333	806	97.7813
	807	807	155.769	159.5	807	97.7701
	808	808	155.945	159.667	808	97.7589
	809	809	156.119	159.833	809	97.7475
	810	810	156.292	160	810	97.7358
	811	811	156.46	160.167	811	97.7241
	812	812	156.626	160.333	812	97.7124
	813	813	156.796	160.5	813	97.7009
	814	814	156.975	160.667	814	97.6886
	815	815	157.142	160.833	815	97.6765
	816	816	157.317	161	816	97.6643
	817	817	157.491	161.167	817	97.6521
	818	818	157.664	161.333	818	97.64
	819	819	157.834	161.5	819	97.6279
	820	820	158.008	161.667	820	97.6157
	821	821	158.173	161.833	821	97.6033
	822	822	158.344	162	822	97.591
	823	823	158.512	162.167	823	97.5788
	824	824	158.693	162.333	824	97.5667
	825	825	158.862	162.5	825	97.5547
	826	826	159.036	162.667	826	97.5429
	827	827	159.21	162.833	827	97.5307
	828	828	159.386	163	828	97.5182
	829	829	159.555	163.167	829	97.5056
	830	830	159.731	163.333	830	97.4931
	831	831	159.899	163.5	831	97.4806
	832	832	160.065	163.667	832	97.468
	833	833	160.244	163.833	833	97.4552
	834	834	160.42	164	834	97.4422
	835	835	160.58	164.167	835	97.4294
	836	836	160.757	164.333	836	97.4165
	837	837	160.937	164.5	837	97.4036
	838	838	161.106	164.667	838	97.3901
	839	839	161.281	164.833	839	97.3765
	840	840	161.451	165	840	97.3631
	841	841	161.613	165.167	841	97.3497
	842	842	161.784	165.333	842	97.3363
	843	843	161.962	165.5	843	97.3232
	844	844	162.133	165.667	844	97.31
	845	845	162.3	165.833	845	97.2967
	846	846	162.475	166	846	97.2835
	847	847	162.643	166.167	847	97.27
	848	848	162.827	166.333	848	97.2564
	849	849	162.99	166.5	849	97.2428
	850	850	163.154	166.667	850	97.228
	851	851	163.322	166.833	851	97.2136
	852	852	163.5	167	852	97.1994
	853	853	163.676	167.167	853	97.1853
	854	854	163.84	167.333	854	97.1712
	855	855	164.023	167.5	855	97.1574
	856	856	164.197	167.667	856	97.1438
	857	857	164.366	167.833	857	97.1303
	858	858	164.533	168	858	97.1177
	859	859	164.703	168.167	859	97.1043
	860	860	164.877	168.333	860	97.0906
	861	861	165.052	168.5	861	97.0765
	862	862	165.223	168.667	862	97.0624
	863	863	165.4	168.833	863	97.0479
	864	864	165.564	169	864	97.0336
	865	865	165.742	169.167	865	97.0191
	866	866	165.908	169.333	866	97.0038
	867	867	166.072	169.5	867	96.9887
	868	868	166.25	169.667	868	96.9736
	869	869	166.419	169.833	869	96.9584
	870	870	166.594	170	870	96.9425
	871	871	166.774	170.167	871	96.9265
	872	872	166.936	170.333	872	96.9108
	873	873	167.109	170.5	873	96.8953
	874	874	167.284	170.667	874	96.8798
	875	875	167.455	170.833	875	96.864
	876	876	167.628	171	876	96.8481
	877	877	167.792	171.167	877	96.8323
	878	878	167.965	171.333	878	96.817
	879	879	168.141	171.5	879	96.8014
	880	880	168.298	171.667	880	96.7859
	881	881	168.483	171.833	881	96.77
	882	882	168.657	172	882	96.754
	883	883	168.821	172.167	883	96.738
	884	884	169.002	172.333	884	96.7221
	885	885	169.17	172.5	885	96.706
	886	886	169.348	172.667	886	96.6898
	887	887	169.512	172.833	887	96.6731
	888	888	169.685	173	888	96.6565
	889	889	169.849	173.167	889	96.64
	890	890	170.031	173.333	890	96.6236
	891	891	170.203	173.5	891	96.6066
	892	892	170.369	173.667	892	96.5896
	893	893	170.544	173.833	893	96.5726
	894	894	170.719	174	894	96.5556
	895	895	170.893	174.167	895	96.5388
	896	896	171.062	174.333	896	96.522
	897	897	171.23	174.5	897	96.505
	898	898	171.404	174.667	898	96.4877
	899	899	171.576	174.833	899	96.4706
	900	900	171.743	175	900	96.4534
	901	901	171.914	175.167	901	96.4363
	902	902	172.091	175.333	902	96.4193
	903	903	172.265	175.5	903	96.4018
	904	904	172.43	175.667	904	96.3842
	905	905	172.612	175.833	905	96.3665
	906	906	172.784	176	906	96.3488
	907	907	172.95	176.167	907	96.331
	908	908	173.129	176.333	908	96.3134
	909	909	173.29	176.5	909	96.2956
	910	910	173.465	176.667	910	96.2775
	911	911	173.636	176.833	911	96.2596
	912	912	173.806	177	912	96.2416
	913	913	173.989	177.167	913	96.2236
	914	914	174.148	177.333	914	96.2057
	915	915	174.326	177.5	915	96.1877
	916	916	174.489	177.667	916	96.1695
	917	917	174.665	177.833	917	96.151
	918	918	174.833	178	918	96.1325
	919	919	175.01	178.167	919	96.114
	920	920	175.178	178.333	920	96.0956
	921	921	175.348	178.5	921	96.0771
	922	922	175.528	178.667	922	96.0585
	923	923	175.705	178.833	923	96.0393
	924	924	175.866	179	924	96.0202
	925	925	176.04	179.167	925	96.0012
	926	926	176.211	179.333	926	95.9821
	927	927	176.386	179.5	927	95.9622
	928	928	176.549	179.667	928	95.9426
	929	929	176.716	179.833	929	95.9231
	930	930	176.895	180	930	95.9036
	931	931	177.072	180.167	931	95.8842
	932	932	177.247	180.333	932	95.8647
	933	933	177.418	180.5	933	95.845
	934	934	177.582	180.667	934	95.825
	935	935	177.76	180.833	935	95.8053
	936	936	177.929	181	936	95.7854
	937	937	178.093	181.167	937	95.7656
	938	938	178.269	181.333	938	95.7458
	939	939	178.435	181.5	939	95.7253
	940	940	178.615	181.667	940	95.7048
	941	941	178.784	181.833	941	95.6843
	942	942	178.951	182	942	95.6638
	943	943	179.126	182.167	943	95.6431
	944	944	179.296	182.333	944	95.6227
	945	945	179.472	182.5	945	95.6021
	946	946	179.644	182.667	946	95.5812
	947	947	179.815	182.833	947	95.5606
	948	948	179.977	183	948	95.5399
	949	949	180.15	183.167	949	95.5192
	950	950	180.331	183.333	950	95.4984
	951	951	180.5	183.5	951	95.4775
	952	952	180.676	183.667	952	95.4559
	953	953	180.853	183.833	953	95.4344
	954	954	181.022	184	954	95.413
	955	955	181.189	184.167	955	95.3916
	956	956	181.361	184.333	956	95.3699
	957	957	181.533	184.5	957	95.3484
	958	958	181.7	184.667	958	95.3266
	959	959	181.876	184.833	959	95.3047
	960	960	182.056	185	960	95.283
	961	961	182.22	185.167	961	95.2611
	962	962	182.395	185.333	962	95.239
	963	963	182.565	185.5	963	95.2167
	964	964	182.735	185.667	964	95.1937
	965	965	182.91	185.833	965	95.1711
	966	966	183.076	186	966	95.1487
	967	967	183.251	186.167	967	95.1262
	968	968	183.417	186.333	968	95.1035
	969	969	183.592	186.5	969	95.0808
	970	970	183.774	186.667	970	95.0579
	971	971	183.947	186.833	971	95.0349
	972	972	184.112	187	972	95.0119
	973	973	184.286	187.167	973	94.989
	974	974	184.457	187.333	974	94.966
	975	975	184.625	187.5	975	94.943
	976	976	184.796	187.667	976	94.9193
	977	977	184.973	187.833	977	94.8956
	978	978	185.142	188	978	94.8721
	979	979	185.308	188.167	979	94.8486
	980	980	185.487	188.333	980	94.8247
	981	981	185.655	188.5	981	94.801
	982	982	185.826	188.667	982	94.7771
	983	983	185.995	188.833	983	94.7531
	984	984	186.166	189	984	94.7292
	985	985	186.337	189.167	985	94.7052
	986	986	186.514	189.333	986	94.6811
	987	987	186.674	189.5	987	94.6571
	988	988	186.846	189.667	988	94.6323
	989	989	187.018	189.833	989	94.6076
	990	990	187.198	190	990	94.5829
	991	991	187.368	190.167	991	94.5583
	992	992	187.542	190.333	992	94.5333
	993	993	187.712	190.5	993	94.5086
	994	994	187.881	190.667	994	94.4841
	995	995	188.055	190.833	995	94.4594
	996	996	188.223	191	996	94.4341
	997	997	188.397	191.167	997	94.4087
	998	998	188.57	191.333	998	94.3833
	999	999	188.745	191.5	999	94.358
	1000	1000	188.92	191.667	1000	94.3316
	1001	1001	189.095	191.833	1001	94.3054
	1002	1002	189.261	192	1002	94.2793
	1003	1003	189.435	192.167	1003	94.2532
	1004	1004	189.609	192.333	1004	94.2272
	1005	1005	189.779	192.5	1005	94.2013
	1006	1006	189.939	192.667	1006	94.1755
	1007	1007	190.115	192.833	1007	94.1498
	1008	1008	190.291	193	1008	94.1239
	1009	1009	190.461	193.167	1009	94.0974
	1010	1010	190.639	193.333	1010	94.0709
	1011	1011	190.807	193.5	1011	94.0443
	1012	1012	190.977	193.667	1012	94.017
	1013	1013	191.148	193.833	1013	93.9901
	1014	1014	191.314	194	1014	93.963
	1015	1015	191.485	194.167	1015	93.9356
	1016	1016	191.658	194.333	1016	93.9082
	1017	1017	191.836	194.5	1017	93.8807
	1018	1018	192.013	194.667	1018	93.8533
	1019	1019	192.181	194.833	1019	93.8259
	1020	1020	192.351	195	1020	93.7979
	1021	1021	192.52	195.167	1021	93.7696
	1022	1022	192.681	195.333	1022	93.7413
	1023	1023	192.858	195.5	1023	93.7131
	1024	1024	193.03	195.667	1024	93.6849
	1025	1025	193.206	195.833	1025	93.6567
	1026	1026	193.375	196	1026	93.6283
	1027	1027	193.552	196.167	1027	93.5998
	1028	1028	193.718	196.333	1028	93.5715
	1029	1029	193.893	196.5	1029	93.5429
	1030	1030	194.063	196.667	1030	93.5145
	1031	1031	194.232	196.833	1031	93.4862
	1032	1032	194.4	197	1032	93.4576
	1033	1033	194.571	197.167	1033	93.4286
	1034	1034	194.745	197.333	1034	93.3994
	1035	1035	194.913	197.5	1035	93.3701
	1036	1036	195.087	197.667	1036	93.3411
	1037	1037	195.267	197.833	1037	93.3114
	1038	1038	195.444	198	1038	93.2817
	1039	1039	195.611	198.167	1039	93.2517
	1040	1040	195.782	198.333	1040	93.2217
	1041	1041	195.952	198.5	1041	93.1914
	1042	1042	196.118	198.667	1042	93.1613
	1043	1043	196.29	198.833	1043	93.1314
	1044	1044	196.465	199	1044	93.1015
	1045	1045	196.632	199.167	1045	93.0719
	1046	1046	196.812	199.333	1046	93.0423
	1047	1047	196.983	199.5	1047	93.0127
	1048	1048	197.155	199.667	1048	92.9828
	1049	1049	197.322	199.833	1049	92.9525
	1050	1050	197.485	200	1050	92.922
	1051	1051	197.666	200.167	1051	92.8913
	1052	1052	197.838	200.333	1052	92.8605
	1053	1053	198.008	200.5	1053	92.8283
	1054	1054	198.175	200.667	1054	92.7965
	1055	1055	198.349	200.833	1055	92.7647
	1056	1056	198.527	201	1056	92.7329
	1057	1057	198.692	201.167	1057	92.7009
	1058	1058	198.872	201.333	1058	92.669
	1059	1059	199.038	201.5	1059	92.6369
	1060	1060	199.211	201.667	1060	92.6045
	1061	1061	199.378	201.833	1061	92.572
	1062	1062	199.55	202	1062	92.5396
	1063	1063	199.722	202.167	1063	92.5072
	1064	1064	199.894	202.333	1064	92.4748
	1065	1065	200.063	202.5	1065	92.4424
	1066	1066	200.233	202.667	1066	92.4098
	1067	1067	200.399	202.833	1067	92.3768
	1068	1068	200.573	203	1068	92.3437
	1069	1069	200.745	203.167	1069	92.3104
	1070	1070	200.916	203.333	1070	92.2773
	1071	1071	201.094	203.5	1071	92.2443
	1072	1072	201.268	203.667	1072	92.2113
	1073	1073	201.43	203.833	1073	92.1777
	1074	1074	201.603	204	1074	92.1438
	1075	1075	201.785	204.167	1075	92.11
	1076	1076	201.954	204.333	1076	92.0763
	1077	1077	202.125	204.5	1077	92.0421
	1078	1078	202.296	204.667	1078	92.0081
	1079	1079	202.458	204.833	1079	91.9739
	1080	1080	202.638	205	1080	91.9393
	1081	1081	202.808	205.167	1081	91.9049
	1082	1082	202.974	205.333	1082	91.8703
	1083	1083	203.148	205.5	1083	91.8357
	1084	1084	203.319	205.667	1084	91.8011
	1085	1085	203.502	205.833	1085	91.7661
	1086	1086	203.664	206	1086	91.7309
	1087	1087	203.842	206.167	1087	91.6954
	1088	1088	204.014	206.333	1088	91.6599
	1089	1089	204.182	206.5	1089	91.6245
	1090	1090	204.348	206.667	1090	91.5887
	1091	1091	204.525	206.833	1091	91.5531
	1092	1092	204.7	207	1092	91.5175
	1093	1093	204.871	207.167	1093	91.4816
	1094	1094	205.043	207.333	1094	91.445
	1095	1095	205.206	207.5	1095	91.4086
	1096	1096	205.379	207.667	1096	91.3721
	1097	1097	205.557	207.833	1097	91.3353
	1098	1098	205.723	208	1098	91.2979
	1099	1099	205.894	208.167	1099	91.2605
	1100	1100	206.072	208.333	1100	91.223
	1101	1101	206.242	208.5	1101	91.1857
	1102	1102	206.411	208.667	1102	91.148
	1103	1103	206.583	208.833	1103	91.1102
	1104	1104	206.76	209	1104	91.0721
	1105	1105	206.924	209.167	1105	91.034
	1106	1106	207.103	209.333	1106	90.9951
	1107	1107	207.277	209.5	1107	90.9566
	1108	1108	207.446	209.667	1108	90.9181
	1109	1109	207.615	209.833	1109	90.8796
	1110	1110	207.782	210	1110	90.8409
	1111	1111	207.955	210.167	1111	90.8026
	1112	1112	208.124	210.333	1112	90.7643
	1113	1113	208.296	210.5	1113	90.7258
	1114	1114	208.474	210.667	1114	90.6869
	1115	1115	208.646	210.833	1115	90.6477
	1116	1116	208.82	211	1116	90.6085
	1117	1117	208.992	211.167	1117	90.5693
	1118	1118	209.159	211.333	1118	90.5289
	1119	1119	209.332	211.5	1119	90.4891
	1120	1120	209.507	211.667	1120	90.4494
	1121	1121	209.671	211.833	1121	90.4094
	1122	1122	209.846	212	1122	90.369
	1123	1123	210.021	212.167	1123	90.3281
	1124	1124	210.191	212.333	1124	90.2871
	1125	1125	210.36	212.5	1125	90.2462
	1126	1126	210.527	212.667	1126	90.2045
	1127	1127	210.706	212.833	1127	90.163
	1128	1128	210.877	213	1128	90.1215
	1129	1129	211.051	213.167	1129	90.08
	1130	1130	211.224	213.333	1130	90.0389
	1131	1131	211.394	213.5	1131	89.9976
	1132	1132	211.561	213.667	1132	89.9558
	1133	1133	211.736	213.833	1133	89.9137
	1134	1134	211.905	214	1134	89.8712
	1135	1135	212.077	214.167	1135	89.8288
	1136	1136	212.256	214.333	1136	89.7862
	1137	1137	212.419	214.5	1137	89.7437
	1138	1138	212.586	214.667	1138	89.7008
	1139	1139	212.759	214.833	1139	89.6579
	1140	1140	212.943	215	1140	89.6147
	1141	1141	213.107	215.167	1141	89.5714
	1142	1142	213.27	215.333	1142	89.5279
	1143	1143	213.447	215.5	1143	89.4844
	1144	1144	213.623	215.667	1144	89.4408
	1145	1145	213.798	215.833	1145	89.3972
	1146	1146	213.964	216	1146	89.353
	1147	1147	214.137	216.167	1147	89.3087
	1148	1148	214.311	216.333	1148	89.2642
	1149	1149	214.48	216.5	1149	89.2196
	1150	1150	214.649	216.667	1150	89.1745
	1151	1151	214.813	216.833	1151	89.1298
	1152	1152	214.994	217	1152	89.0851
	1153	1153	215.16	217.167	1153	89.0403
	1154	1154	215.338	217.333	1154	88.9951
	1155	1155	215.511	217.5	1155	88.9499
	1156	1156	215.682	217.667	1156	88.9046
	1157	1157	215.849	217.833	1157	88.859
	1158	1158	216.021	218	1158	88.812
	1159	1159	216.193	218.167	1159	88.7652
	1160	1160	216.365	218.333	1160	88.7185
	1161	1161	216.534	218.5	1161	88.6719
	1162	1162	216.71	218.667	1162	88.6245
	1163	1163	216.882	218.833	1163	88.5777
	1164	1164	217.053	219	1164	88.531
	1165	1165	217.228	219.167	1165	88.4842
	1166	1166	217.397	219.333	1166	88.4374
	1167	1167	217.564	219.5	1167	88.3903
	1168	1168	217.738	219.667	1168	88.343
	1169	1169	217.912	219.833	1169	88.2955
	1170	1170	218.077	220	1170	88.2475
	1171	1171	218.249	220.167	1171	88.1999
	1172	1172	218.418	220.333	1172	88.1522
	1173	1173	218.596	220.5	1173	88.1043
	1174	1174	218.767	220.667	1174	88.056
	1175	1175	218.933	220.833	1175	88.0075
	1176	1176	219.105	221	1176	87.9589
	1177	1177	219.278	221.167	1177	87.9104
	1178	1178	219.457	221.333	1178	87.8609
	1179	1179	219.634	221.5	1179	87.8115
	1180	1180	219.801	221.667	1180	87.7619
	1181	1181	219.96	221.833	1181	87.7121
	1182	1182	220.14	222	1182	87.6622
	1183	1183	220.315	222.167	1183	87.6118
	1184	1184	220.481	222.333	1184	87.5617
	1185	1185	220.655	222.5	1185	87.5117
	1186	1186	220.825	222.667	1186	87.4618
	1187	1187	220.992	222.833	1187	87.4112
	1188	1188	221.16	223	1188	87.3604
	1189	1189	221.329	223.167	1189	87.3095
	1190	1190	221.506	223.333	1190	87.2585
	1191	1191	221.682	223.5	1191	87.2066
	1192	1192	221.853	223.667	1192	87.1549
	1193	1193	222.023	223.833	1193	87.1028
	1194	1194	222.189	224	1194	87.0507
	1195	1195	222.362	224.167	1195	86.9982
	1196	1196	222.535	224.333	1196	86.9459
	1197	1197	222.704	224.5	1197	86.8936
	1198	1198	222.878	224.667	1198	86.8414
	1199	1199	223.056	224.833	1199	86.7886
	1200	1200	223.227	225	1200	86.7355
	1201	1201	223.399	225.167	1201	86.6823
	1202	1202	223.565	225.333	1202	86.6289
	1203	1203	223.735	225.5	1203	86.5749
	1204	1204	223.916	225.667	1204	86.5213
	1205	1205	224.085	225.833	1205	86.4676
	1206	1206	224.255	226	1206	86.4138
	1207	1207	224.422	226.167	1207	86.3595
	1208	1208	224.591	226.333	1208	86.305
	1209	1209	224.765	226.5	1209	86.2504
	1210	1210	224.941	226.667	1210	86.1957
	1211	1211	225.111	226.833	1211	86.1402
	1212	1212	225.28	227	1212	86.0852
	1213	1213	225.449	227.167	1213	86.0302
	1214	1214	225.627	227.333	1214	85.9751
	1215	1215	225.797	227.5	1215	85.9193
	1216	1216	225.962	227.667	1216	85.8634
	1217	1217	226.126	227.833	1217	85.8074
	1218	1218	226.3	228	1218	85.7513
	1219	1219	226.472	228.167	1219	85.6944
	1220	1220	226.644	228.333	1220	85.6381
	1221	1221	226.82	228.5	1221	85.5816
	1222	1222	226.995	228.667	1222	85.5249
	1223	1223	227.159	228.833	1223	85.4678
	1224	1224	227.327	229	1224	85.4105
	1225	1225	227.51	229.167	1225	85.3531
	1226	1226	227.673	229.333	1226	85.2956
	1227	1227	227.845	229.5	1227	85.2373
	1228	1228	228.011	229.667	1228	85.1794
	1229	1229	228.188	229.833	1229	85.1213
	1230	1230	228.358	230	1230	85.0628
	1231	1231	228.534	230.167	1231	85.0041
	1232	1232	228.706	230.333	1232	84.9452
	1233	1233	228.868	230.5	1233	84.8863
	1234	1234	229.043	230.667	1234	84.8274
	1235	1235	229.215	230.833	1235	84.7678
	1236	1236	229.383	231	1236	84.709
	1237	1237	229.551	231.167	1237	84.6506
	1238	1238	229.726	231.333	1238	84.5925
	1239	1239	229.899	231.5	1239	84.535
	1240	1240	230.062	231.667	1240	84.4769
	1241	1241	230.236	231.833	1241	84.4181
	1242	1242	230.414	232	1242	84.3587
	1243	1243	230.586	232.167	1243	84.2984
	1244	1244	230.751	232.333	1244	84.2379
	1245	1245	230.932	232.5	1245	84.1768
	1246	1246	231.095	232.667	1246	84.1152
	1247	1247	231.269	232.833	1247	84.0519
	1248	1248	231.438	233	1248	83.9894
	1249	1249	231.601	233.167	1249	83.9269
	1250	1250	231.77	233.333	1250	83.864
	1251	1251	231.944	233.5	1251	83.8009
	1252	1252	232.122	233.667	1252	83.7374
	1253	1253	232.287	233.833	1253	83.6742
	1254	1254	232.46	234	1254	83.6108
	1255	1255	232.624	234.167	1255	83.5468
	1256	1256	232.797	234.333	1256	83.4822
	1257	1257	232.975	234.5	1257	83.4179
	1258	1258	233.146	234.667	1258	83.3535
	1259	1259	233.308	234.833	1259	83.289
	1260	1260	233.488	235	1260	83.2238
	1261	1261	233.651	235.167	1261	83.1586
	1262	1262	233.831	235.333	1262	83.0935
	1263	1263	234.001	235.5	1263	83.0287
	1264	1264	234.166	235.667	1264	82.9632
	1265	1265	234.335	235.833	1265	82.8978
	1266	1266	234.507	236	1266	82.8322
	1267	1267	234.67	236.167	1267	82.7663
	1268	1268	234.843	236.333	1268	82.6998
	1269	1269	235.012	236.5	1269	82.6335
	1270	1270	235.189	236.667	1270	82.5671
	1271	1271	235.371	236.833	1271	82.5007
	1272	1272	235.537	237	1272	82.4342
	1273	1273	235.703	237.167	1273	82.3679
	1274	1274	235.872	237.333	1274	82.3016
	1275	1275	236.039	237.5	1275	82.2353
	1276	1276	236.216	237.667	1276	82.1686
	1277	1277	236.386	237.833	1277	82.1012
	1278	1278	236.558	238	1278	82.0336
	1279	1279	236.724	238.167	1279	81.9657
	1280	1280	236.9	238.333	1280	81.8966
	1281	1281	237.075	238.5	1281	81.8278
	1282	1282	237.247	238.667	1282	81.7588
	1283	1283	237.417	238.833	1283	81.6897
	1284	1284	237.586	239	1284	81.6203
	1285	1285	237.756	239.167	1285	81.5511
	1286	1286	237.919	239.333	1286	81.4817
	1287	1287	238.091	239.5	1287	81.412
	1288	1288	238.262	239.667	1288	81.3418
	1289	1289	238.432	239.833	1289	81.2716
	1290	1290	238.599	240	1290	81.2015
	1291	1291	238.773	240.167	1291	81.1312
	1292	1292	238.944	240.333	1292	81.0605
	1293	1293	239.121	240.5	1293	80.9899
	1294	1294	239.29	240.667	1294	80.919
	1295	1295	239.46	240.833	1295	80.8477
	1296	1296	239.627	241	1296	80.776
	1297	1297	239.802	241.167	1297	80.7042
	1298	1298	239.978	241.333	1298	80.6323
	1299	1299	240.142	241.5	1299	80.5604
	1300	1300	240.315	241.667	1300	80.4877
	1301	1301	240.49	241.833	1301	80.4157
	1302	1302	240.662	242	1302	80.3443
	1303	1303	240.833	242.167	1303	80.2733
	1304	1304	241.006	242.333	1304	80.2023
	1305	1305	241.172	242.5	1305	80.1303
	1306	1306	241.337	242.667	1306	80.0575
	1307	1307	241.513	242.833	1307	79.9841
	1308	1308	241.681	243	1308	79.9093
	1309	1309	241.849	243.167	1309	79.8346
	1310	1310	242.023	243.333	1310	79.7596
	1311	1311	242.193	243.5	1311	79.6842
	1312	1312	242.363	243.667	1312	79.6076
	1313	1313	242.533	243.833	1313	79.5317
	1314	1314	242.704	244	1314	79.456
	1315	1315	242.876	244.167	1315	79.3803
	1316	1316	243.049	244.333	1316	79.3046
	1317	1317	243.22	244.5	1317	79.2286
	1318	1318	243.385	244.667	1318	79.1521
	1319	1319	243.552	244.833	1319	79.0755
	1320	1320	243.727	245	1320	78.9983
	1321	1321	243.897	245.167	1321	78.9214
	1322	1322	244.07	245.333	1322	78.8445
	1323	1323	244.239	245.5	1323	78.7676
	1324	1324	244.408	245.667	1324	78.6903
	1325	1325	244.58	245.833	1325	78.6131
	1326	1326	244.756	246	1326	78.5357
	1327	1327	244.92	246.167	1327	78.458
	1328	1328	245.086	246.333	1328	78.3797
	1329	1329	245.263	246.5	1329	78.3013
	1330	1330	245.444	246.667	1330	78.2229
	1331	1331	245.61	246.833	1331	78.1443
	1332	1332	245.779	247	1332	78.0644
	1333	1333	245.951	247.167	1333	77.9846
	1334	1334	246.121	247.333	1334	77.9047
	1335	1335	246.288	247.5	1335	77.8247
	1336	1336	246.465	247.667	1336	77.7439
	1337	1337	246.635	247.833	1337	77.6636
	1338	1338	246.803	248	1338	77.5833
	1339	1339	246.97	248.167	1339	77.5031
	1340	1340	247.145	248.333	1340	77.4229
	1341	1341	247.308	248.5	1341	77.3425
	1342	1342	247.484	248.667	1342	77.2615
	1343	1343	247.656	248.833	1343	77.1799
	1344	1344	247.824	249	1344	77.0982
	1345	1345	247.99	249.167	1345	77.0152
	1346	1346	248.166	249.333	1346	76.9323
	1347	1347	248.339	249.5	1347	76.849
	1348	1348	248.501	249.667	1348	76.7657
	1349	1349	248.673	249.833	1349	76.6815
	1350	1350	248.841	250	1350	76.5979
	1351	1351	249.018	250.167	1351	76.5144
	1352	1352	249.181	250.333	1352	76.4309
	1353	1353	249.349	250.5	1353	76.3473
	1354	1354	249.526	250.667	1354	76.2633
	1355	1355	249.693	250.833	1355	76.1788
	1356	1356	249.86	251	1356	76.0943
	1357	1357	250.035	251.167	1357	76.0089
	1358	1358	250.204	251.333	1358	75.9239
	1359	1359	250.368	251.5	1359	75.8388
	1360	1360	250.537	251.667	1360	75.7535
	1361	1361	250.717	251.833	1361	75.6673
	1362	1362	250.878	252	1362	75.581
	1363	1363	251.055	252.167	1363	75.4943
	1364	1364	251.227	252.333	1364	75.4075
	1365	1365	251.397	252.5	1365	75.3199
	1366	1366	251.571	252.667	1366	75.2328
	1367	1367	251.738	252.833	1367	75.1455
	1368	1368	251.901	253	1368	75.0578
	1369	1369	252.077	253.167	1369	74.9699
	1370	1370	252.247	253.333	1370	74.8821
	1371	1371	252.417	253.5	1371	74.7941
	1372	1372	252.593	253.667	1372	74.7061
	1373	1373	252.771	253.833	1373	74.6172
	1374	1374	252.931	254	1374	74.5286
	1375	1375	253.102	254.167	1375	74.44
	1376	1376	253.272	254.333	1376	74.3513
	1377	1377	253.449	254.5	1377	74.2618
	1378	1378	253.605	254.667	1378	74.1722
	1379	1379	253.785	254.833	1379	74.0824
	1380	1380	253.952	255	1380	73.9922
	1381	1381	254.13	255.167	1381	73.9006
	1382	1382	254.297	255.333	1382	73.8096
	1383	1383	254.467	255.5	1383	73.7188
	1384	1384	254.634	255.667	1384	73.628
	1385	1385	254.802	255.833	1385	73.5359
	1386	1386	254.979	256	1386	73.4437
	1387	1387	255.144	256.167	1387	73.3515
	1388	1388	255.313	256.333	1388	73.2592
	1389	1389	255.48	256.5	1389	73.1658
	1390	1390	255.658	256.667	1390	73.0729
	1391	1391	255.831	256.833	1391	72.9801
	1392	1392	256	257	1392	72.8873
	1393	1393	256.17	257.167	1393	72.7938
	1394	1394	256.336	257.333	1394	72.6999
	1395	1395	256.509	257.5	1395	72.6057
	1396	1396	256.677	257.667	1396	72.5114
	1397	1397	256.85	257.833	1397	72.4159
	1398	1398	257.021	258	1398	72.3211
	1399	1399	257.19	258.167	1399	72.2264
	1400	1400	257.356	258.333	1400	72.1316
	1401	1401	257.533	258.5	1401	72.0362
	1402	1402	257.705	258.667	1402	71.9405
	1403	1403	257.873	258.833	1403	71.8445
	1404	1404	258.046	259	1404	71.7485
	1405	1405	258.215	259.167	1405	71.6513
	1406	1406	258.388	259.333	1406	71.5547
	1407	1407	258.557	259.5	1407	71.4581
	1408	1408	258.723	259.667	1408	71.3615
	1409	1409	258.898	259.833	1409	71.2646
	1410	1410	259.067	260	1410	71.1671
	1411	1411	259.237	260.167	1411	71.0691
	1412	1412	259.403	260.333	1412	70.9707
	1413	1413	259.586	260.5	1413	70.8718
	1414	1414	259.747	260.667	1414	70.7725
	1415	1415	259.917	260.833	1415	70.6735
	1416	1416	260.085	261	1416	70.5742
	1417	1417	260.257	261.167	1417	70.4747
	1418	1418	260.425	261.333	1418	70.3742
	1419	1419	260.588	261.5	1419	70.2739
	1420	1420	260.773	261.667	1420	70.1733
	1421	1421	260.938	261.833	1421	70.0724
	1422	1422	261.105	262	1422	69.9713
	1423	1423	261.279	262.167	1423	69.8705
	1424	1424	261.446	262.333	1424	69.7697
	1425	1425	261.62	262.5	1425	69.6694
	1426	1426	261.805	262.667	1426	69.5679
	1427	1427	261.971	262.833	1427	69.466
	1428	1428	262.137	263	1428	69.3638
	1429	1429	262.308	263.167	1429	69.2614
	1430	1430	262.479	263.333	1430	69.1581
	1431	1431	262.646	263.5	1431	69.0548
	1432	1432	262.814	263.667	1432	68.9509
	1433	1433	262.987	263.833	1433	68.8463
	1434	1434	263.158	264	1434	68.7411
	1435	1435	263.329	264.167	1435	68.6362
	1436	1436	263.496	264.333	1436	68.5314
	1437	1437	263.664	264.5	1437	68.4265
	1438	1438	263.837	264.667	1438	68.3211
	1439	1439	264.007	264.833	1439	68.2157
	1440	1440	264.181	265	1440	68.1099
	1441	1441	264.344	265.167	1441	68.0039
	1442	1442	264.518	265.333	1442	67.8975
	1443	1443	264.686	265.5	1443	67.791
	1444	1444	264.859	265.667	1444	67.6846
	1445	1445	265.027	265.833	1445	67.5781
	1446	1446	265.191	266	1446	67.4709
	1447	1447	265.365	266.167	1447	67.3637
	1448	1448	265.535	266.333	1448	67.2561
	1449	1449	265.702	266.5	1449	67.1482
	1450	1450	265.868	266.667	1450	67.0396
	1451	1451	266.037	266.833	1451	66.9312
	1452	1452	266.21	267	1452	66.8226
	1453	1453	266.387	267.167	1453	66.7139
	1454	1454	266.56	267.333	1454	66.6045
	1455	1455	266.726	267.5	1455	66.4951
	1456	1456	266.898	267.667	1456	66.385
	1457	1457	267.067	267.833	1457	66.2746
	1458	1458	267.236	268	1458	66.1635
	1459	1459	267.4	268.167	1459	66.0525
	1460	1460	267.569	268.333	1460	65.9414
	1461	1461	267.744	268.5	1461	65.8302
	1462	1462	267.908	268.667	1462	65.7182
	1463	1463
							1442	64.6585
							1443	64.5372
							1444	64.4157
							1445	64.2942
							1446	64.1717
							1447	64.0494
							1448	63.9267
							1449	63.8039
							1450	63.6805
							1451	63.5572
							1452	63.4339
							1453	63.3105
							1454	63.1865
							1455	63.0624
							1456	62.9378
							1457	62.8129
							1458	62.6871
							1459	62.5615
							1460	62.4358
							1461	62.3101
							1462	62.1834
							1463	62.0567
							1464	61.9296
							1465	61.8024
							1466	61.6743
							1467	61.5465
							1468	61.4186
							1469	61.2907
							1470	61.162
							1471	61.0332
							1472	60.904
							1473	60.7747
							1474	60.6446
							1475	60.5148
							1476	60.3849
							1477	60.2548
							1478	60.1238
							1479	59.9928
							1480	59.8618
							1481	59.7308
							1482	59.5991
							1483	59.4677
							1484	59.3362
							1485	59.2046
							1486	59.0728
							1487	58.9403
							1488	58.8073
							1489	58.6739
							1490	58.5393
							1491	58.4051
							1492	58.2708
							1493	58.1363
							1494	58.001
							1495	57.8656
							1496	57.73
							1497	57.5941
							1498	57.4574
							1499	57.321
							1500	57.1847
							1501	57.0484
							1502	56.9116
							1503	56.7745
							1504	56.6371
							1505	56.4996
							1506	56.3616
							1507	56.2231
							1508	56.0848
							1509	55.9466
							1510	55.8073
							1511	55.6688
							1512	55.5297
							1513	55.3901
							1514	55.2494
							1515	55.1089
							1516	54.9685
							1517	54.828
							1518	54.6875
							1519	54.5468
							1520	54.4057
							1521	54.2642
							1522	54.1222
							1523	53.9797
							1524	53.8372
							1525	53.6947
							1526	53.5521
							1527	53.4082
							1528	53.2644
							1529	53.1206
							1530	52.9766
							1531	52.8318
							1532	52.6875
							1533	52.5432
							1534	52.3989
							1535	52.2542
							1536	52.109
							1537	51.9635
							1538	51.8177
							1539	51.671
							1540	51.5248
							1541	51.3787
							1542	51.2325
							1543	51.086
							1544	50.9395
							1545	50.793
							1546	50.6464
							1547	50.4987
							1548	50.3509
							1549	50.2029
							1550	50.0548
							1551	49.9058
							1552	49.7575
							1553	49.6091
							1554	49.4605
							1555	49.3114
							1556	49.1617
							1557	49.0118
							1558	48.8617
							1559	48.7103
							1560	48.5596
							1561	48.4086
							1562	48.2574
							1563	48.1061
							1564	47.9546
							1565	47.803
							1566	47.6513
							1567	47.4992
							1568	47.3475
							1569	47.1957
							1570	47.0437
							1571	46.891
							1572	46.738
							1573	46.5848
							1574	46.4316
							1575	46.2777
							1576	46.1237
							1577	45.9698
							1578	45.8157
							1579	45.661
							1580	45.5065
							1581	45.3519
							1582	45.1976
							1583	45.0432
							1584	44.8891
							1585	44.7348
							1586	44.5802
							1587	44.4256
							1588	44.2709
							1589	44.1157
							1590	43.9598
							1591	43.8035
							1592	43.646
							1593	43.489
							1594	43.3321
							1595	43.1752
							1596	43.0174
							1597	42.8596
							1598	42.7017
							1599	42.5437
							1600	42.3854
							1601	42.2274
							1602	42.0695
							1603	41.9118
							1604	41.7541
							1605	41.5957
							1606	41.437
							1607	41.2782
							1608	41.1188
							1609	40.9598
							1610	40.8009
							1611	40.6421
							1612	40.4833
							1613	40.3239
							1614	40.1642
							1615	40.0045
							1616	39.8442
							1617	39.6842
							1618	39.5243
							1619	39.3644
							1620	39.204
							1621	39.0432
							1622	38.8824
							1623	38.7216
							1624	38.5601
							1625	38.399
							1626	38.2381
							1627	38.0773
							1628	37.9168
							1629	37.756
							1630	37.5952
							1631	37.4341
							1632	37.2724
							1633	37.1109
							1634	36.9493
							1635	36.7877
							1636	36.6254
							1637	36.4636
							1638	36.3018
							1639	36.1399
							1640	35.9777
							1641	35.8152
							1642	35.6526
							1643	35.49
							1644	35.3268
							1645	35.1641
							1646	35.0015
							1647	34.839
							1648	34.6769
							1649	34.5141
							1650	34.3511
							1651	34.1879
							1652	34.0242
							1653	33.8606
							1654	33.6971
							1655	33.5336
							1656	33.3694
							1657	33.2054
							1658	33.0416
							1659	32.8778
							1660	32.7139
							1661	32.5504
							1662	32.387
							1663	32.2237
							1664	32.061
							1665	31.8978
							1666	31.7343
							1667	31.5705
							1668	31.4067
							1669	31.2425
							1670	31.0786
							1671	30.9148
							1672	30.7513
							1673	30.5881
							1674	30.4245
							1675	30.2606
							1676	30.0965
							1677	29.9325
							1678	29.7686
							1679	29.6047
							1680	29.441
							1681	29.2775
							1682	29.1142
							1683	28.9508
							1684	28.7873
							1685	28.6238
							1686	28.4601
							1687	28.2964
							1688	28.1327
							1689	27.9687
							1690	27.805
							1691	27.6417
							1692	27.4785
							1693	27.3159
							1694	27.1526
							1695	26.9889
							1696	26.8253
							1697	26.6616
							1698	26.4981
							1699	26.3349
							1700	26.1717
							1701	26.0089
							1702	25.8461
							1703	25.683
							1704	25.5197
							1705	25.3566
							1706	25.1934
							1707	25.0306
							1708	24.8678
							1709	24.7053
							1710	24.5432
							1711	24.3809
							1712	24.2184
							1713	24.0566
							1714	23.8945
							1715	23.7326
							1716	23.571
							1717	23.4093
							1718	23.2479
							1719	23.0867
							1720	22.9255
							1721	22.7647
							1722	22.6037
							1723	22.4428
							1724	22.2821
							1725	22.1216
							1726	21.9614
							1727	21.8013
							1728	21.6413
							1729	21.4823
							1730	21.3227
							1731	21.1629
							1732	21.0032
							1733	20.8438
							1734	20.6847
							1735	20.5259
							1736	20.3674
							1737	20.2098
							1738	20.0525
							1739	19.8951
							1740	19.7376
							1741	19.5804
							1742	19.4229
							1743	19.2656
							1744	19.1085
							1745	18.9521
							1746	18.7957
							1747	18.6397
							1748	18.4837
							1749	18.3276
							1750	18.1725
							1751	18.0172
							1752	17.862
							1753	17.707
							1754	17.5527
							1755	17.3988
							1756	17.2454
							1757	17.0921
							1758	16.9404
							1759	16.7878
							1760	16.6352
							1761	16.4827
							1762	16.3306
							1763	16.1789
							1764	16.0274
							1765	15.876
							1766	15.7253
							1767	15.5747
							1768	15.4243
							1769	15.2742
							1770	15.1253
							1771	14.9766
							1772	14.8284
							1773	14.6804
							1774	14.5346
							1775	14.3882
							1776	14.2418
							1777	14.0954
							1778	13.9502
							1779	13.8049
							1780	13.66
							1781	13.5153
							1782	13.3721
							1783	13.2291
							1784	13.0864
							1785	12.9438
							1786	12.8026
							1787	12.661
							1788	12.5198
							1789	12.3788
							1790	12.239
							1791	12.0996
							1792	11.9608
							1793	11.8223
							1794	11.6858
							1795	11.5484
							1796	11.411
							1797	11.274
							1798	11.1382
							1799	11.0027
							1800	10.8681
							1801	10.734
							1802	10.6023
							1803	10.4701
							1804	10.338
							1805	10.2061
							1806	10.0764
							1807	9.9464
							1808	9.81684
							1809	9.68779
							1810	9.56107
							1811	9.43408
							1812	9.30731
							1813	9.18063
							1814	9.0562
							1815	8.93151
							1816	8.80731
							1817	8.68381
							1818	8.56067
							1819	8.44053
							1820	8.32024
							1821	8.20049
							1822	8.08125
							1823	7.96408
							1824	7.84649
							1825	7.72952
							1826	7.6126
							1827	7.49865
							1828	7.38466
							1829	7.27149
							1830	7.15899
							1831	7.05006
							1832	6.94009
							1833	6.83032
							1834	6.721
							1835	6.61443
							1836	6.50765
							1837	6.40155
							1838	6.29607
							1839	6.19368
							1840	6.09103
							1841	5.98914
							1842	5.88794
							1843	5.79005
							1844	5.6913
							1845	5.59311
							1846	5.49566
							1847	5.40101
							1848	5.30605
							1849	5.21185
							1850	5.11841
							1851	5.02809
							1852	4.93728
							1853	4.84738
							1854	4.7583
							1855	4.67287
							1856	4.58722
							1857	4.50251
							1858	4.41863
							1859	4.33932
							1860	4.25927
							1861	4.17986
							1862	4.10102
							1863	4.0257
							1864	3.94987
							1865	3.87502
							1866	3.80102
							1867	3.7306
							1868	3.66031
							1869	3.59111
							1870	3.52273
							1871	3.4588
							1872	3.39393
							1873	3.33001
							1874	3.26697
							1875	3.20793
							1876	3.14885
							1877	3.09088
							1878	3.03382
							1879	2.98202
							1880	2.92937
							1881	2.87733
							1882	2.82576
							1883	2.7783
							1884	2.73011
							1885	2.68269
							1886	2.63606
							1887	2.5932
							1888	2.55029
							1889	2.50826
							1890	2.46685
							1891	2.42944
							1892	2.39107
							1893	2.35343
							1894	2.31656
							1895	2.2828
							1896	2.24892
							1897	2.21586
							1898	2.18346
							1899	2.15408
							1900	2.12436
							1901	2.09482
							1902	2.06578
							1903	2.03954
							1904	2.01241
							1905	1.98637
							1906	1.96102
							1907	1.93828
							1908	1.91523
							1909	1.89212
							1910	1.86963
							1911	1.84769
							1912	1.82755
							1913	1.80744
							1914	1.78798
							1915	1.769
							1916	1.75248
							1917	1.73541
							1918	1.7185
							1919	1.70168
							1920	1.68624
							1921	1.67052
							1922	1.65512
							1923	1.6401
							1924	1.62644
							1925	1.61306
							1926	1.60019
							1927	1.58766
							1928	1.57674
							1929	1.56488
							1930	1.55316
							1931	1.54164
							1932	1.53059
							1933	1.51999
							1934	1.50985
							1935	1.49997
							1936	1.49139
							1937	1.48202
							1938	1.47255
							1939	1.46324
							1940	1.45454
							1941	1.44608
							1942	1.43801
							1943	1.4302
							1944	1.4236
							1945	1.41681
							1946	1.41022
							1947	1.40376
							1948	1.39759
							1949	1.39106
							1950	1.38462
							1951	1.37829
							1952	1.37203
							1953	1.36621
							1954	1.36082
							1955	1.3556
							1956	1.35167
							1957	1.3474
							1958	1.34293
							1959	1.33834
							1960	1.33384
							1961	1.32916
							1962	1.32471
							1963	1.32041
							1964	1.31583
							1965	1.31179
							1966	1.30806
							1967	1.30444
							1968	1.30111
[truncated: 1,482 more rows]

## Sheet: B20
Title	20.08.2018	12:44:00
________________________________________________________________________________
Title
Evaluation	Categories:
Curve	Name:
	!20%-25..600C	10K	N2	50ML	AL100	BLANK	20.08.2018	12:43:57
Curve	Values:
	Index	t	Ts	Tr	x	value	y	value
	[s]	[°C]	[°C]	[s]	[%]
	0	0	25.0581	25	0	100
	1	1	25.0425	25.1667	1	100.001
	2	2	25.0703	25.3333	2	100.001
	3	3	25.1338	25.5	3	100.002
	4	4	25.2228	25.6667	4	100.001
	5	5	25.3089	25.8333	5	99.9918
	6	6	25.4018	26	6	99.9792
	7	7	25.4855	26.1667	7	99.9656
	8	8	25.5906	26.3333	8	99.9584
	9	9	25.698	26.5	9	99.9491
	10	10	25.8109	26.6667	10	99.9398
	11	11	25.9334	26.8333	11	99.9452
	12	12	26.0459	27	12	99.9416
	13	13	26.1714	27.1667	13	99.9372
	14	14	26.3039	27.3333	14	99.9337
	15	15	26.4372	27.5	15	99.9402
	16	16	26.5915	27.6667	16	99.9396
	17	17	26.7181	27.8333	17	99.9393
	18	18	26.8471	28	18	99.9395
	19	19	26.9798	28.1667	19	99.9399
	20	20	27.1079	28.3333	20	99.9394
	21	21	27.2477	28.5	21	99.9394
	22	22	27.4032	28.6667	22	99.9394
	23	23	27.5297	28.8333	23	99.9392
	24	24	27.6555	29	24	99.9393
	25	25	27.7904	29.1667	25	99.9395
	26	26	27.926	29.3333	26	99.9397
	27	27	28.0744	29.5	27	99.9399
	28	28	28.2178	29.6667	28	99.9405
	29	29	28.3557	29.8333	29	99.9411
	30	30	28.5053	30	30	99.9417
	31	31	28.6275	30.1667	31	99.9423
	32	32	28.7664	30.3333	32	99.9431
	33	33	28.8989	30.5	33	99.9438
	34	34	29.0438	30.6667	34	99.9445
	35	35	29.1807	30.8333	35	99.9452
	36	36	29.3144	31	36	99.9455
	37	37	29.4478	31.1667	37	99.946
	38	38	29.5883	31.3333	38	99.9465
	39	39	29.7356	31.5	39	99.9468
	40	40	29.8608	31.6667	40	99.9473
	41	41	30.0021	31.8333	41	99.948
	42	42	30.1364	32	42	99.9484
	43	43	30.2701	32.1667	43	99.9489
	44	44	30.4055	32.3333	44	99.9496
	45	45	30.5423	32.5	45	99.9499
	46	46	30.6741	32.6667	46	99.95
	47	47	30.8156	32.8333	47	99.9504
	48	48	30.9459	33	48	99.95
	49	49	31.0674	33.1667	49	99.9499
	50	50	31.2085	33.3333	50	99.9498
	51	51	31.3401	33.5	51	99.9494
	52	52	31.4806	33.6667	52	99.9489
	53	53	31.6144	33.8333	53	99.9485
	54	54	31.7583	34	54	99.948
	55	55	31.8972	34.1667	55	99.9474
	56	56	32.0139	34.3333	56	99.9467
	57	57	32.1495	34.5	57	99.9459
	58	58	32.2834	34.6667	58	99.9451
	59	59	32.4171	34.8333	59	99.9443
	60	60	32.5569	35	60	99.9431
	61	61	32.686	35.1667	61	99.942
	62	62	32.8165	35.3333	62	99.9409
	63	63	32.955	35.5	63	99.9398
	64	64	33.0732	35.6667	64	99.9387
	65	65	33.2293	35.8333	65	99.9378
	66	66	33.36	36	66	99.9369
	67	67	33.4819	36.1667	67	99.936
	68	68	33.6062	36.3333	68	99.9355
	69	69	33.7471	36.5	69	99.9346
	70	70	33.8914	36.6667	70	99.9338
	71	71	34.0247	36.8333	71	99.9331
	72	72	34.1554	37	72	99.9321
	73	73	34.2931	37.1667	73	99.9313
	74	74	34.4334	37.3333	74	99.9303
	75	75	34.5635	37.5	75	99.9293
	76	76	34.6892	37.6667	76	99.9282
	77	77	34.8225	37.8333	77	99.9271
	78	78	34.9685	38	78	99.9261
	79	79	35.093	38.1667	79	99.9252
	80	80	35.2305	38.3333	80	99.9239
	81	81	35.3756	38.5	81	99.9228
	82	82	35.5119	38.6667	82	99.9218
	83	83	35.6484	38.8333	83	99.9206
	84	84	35.7764	39	84	99.9194
	85	85	35.911	39.1667	85	99.9183
	86	86	36.0497	39.3333	86	99.9172
	87	87	36.1819	39.5	87	99.9162
	88	88	36.316	39.6667	88	99.9154
	89	89	36.4555	39.8333	89	99.9147
	90	90	36.5903	40	90	99.914
	91	91	36.7162	40.1667	91	99.9133
	92	92	36.8616	40.3333	92	99.9129
	93	93	37.0031	40.5	93	99.9123
	94	94	37.1333	40.6667	94	99.9119
	95	95	37.2772	40.8333	95	99.9115
	96	96	37.4057	41	96	99.911
	97	97	37.5428	41.1667	97	99.9106
	98	98	37.697	41.3333	98	99.9103
	99	99	37.8305	41.5	99	99.91
	100	100	37.9703	41.6667	100	99.9096
	101	101	38.1064	41.8333	101	99.9094
	102	102	38.2492	42	102	99.9092
	103	103	38.3895	42.1667	103	99.909
	104	104	38.5315	42.3333	104	99.9087
	105	105	38.6702	42.5	105	99.9086
	106	106	38.8015	42.6667	106	99.9084
	107	107	38.9446	42.8333	107	99.9079
	108	108	39.0817	43	108	99.9074
	109	109	39.22	43.1667	109	99.9069
	110	110	39.3641	43.3333	110	99.9064
	111	111	39.4995	43.5	111	99.9061
	112	112	39.6368	43.6667	112	99.9057
	113	113	39.773	43.8333	113	99.9055
	114	114	39.931	44	114	99.9053
	115	115	40.0715	44.1667	115	99.9049
	116	116	40.2066	44.3333	116	99.9047
	117	117	40.3475	44.5	117	99.9045
	118	118	40.4945	44.6667	118	99.9043
	119	119	40.632	44.8333	119	99.9041
	120	120	40.7648	45	120	99.9038
	121	121	40.9111	45.1667	121	99.9036
	122	122	41.0608	45.3333	122	99.9033
	123	123	41.1927	45.5	123	99.903
	124	124	41.3462	45.6667	124	99.9027
	125	125	41.485	45.8333	125	99.9027
	126	126	41.618	46	126	99.9024
	127	127	41.7664	46.1667	127	99.9022
	128	128	41.9008	46.3333	128	99.9021
	129	129	42.0454	46.5	129	99.9021
	130	130	42.1919	46.6667	130	99.9022
	131	131	42.3264	46.8333	131	99.9022
	132	132	42.474	47	132	99.9021
	133	133	42.6129	47.1667	133	99.9023
	134	134	42.7568	47.3333	134	99.9023
	135	135	42.8957	47.5	135	99.9022
	136	136	43.05	47.6667	136	99.9022
	137	137	43.1973	47.8333	137	99.9019
	138	138	43.3418	48	138	99.9019
	139	139	43.4741	48.1667	139	99.9021
	140	140	43.6212	48.3333	140	99.902
	141	141	43.7625	48.5	141	99.902
	142	142	43.9114	48.6667	142	99.902
	143	143	44.0704	48.8333	143	99.9019
	144	144	44.2053	49	144	99.9019
	145	145	44.3581	49.1667	145	99.9022
	146	146	44.4965	49.3333	146	99.9022
	147	147	44.641	49.5	147	99.9023
	148	148	44.7828	49.6667	148	99.9026
	149	149	44.9428	49.8333	149	99.9029
	150	150	45.0783	50	150	99.903
	151	151	45.224	50.1667	151	99.903
	152	152	45.3719	50.3333	152	99.9031
	153	153	45.5099	50.5	153	99.9027
	154	154	45.6668	50.6667	154	99.9026
	155	155	45.8224	50.8333	155	99.9024
	156	156	45.9686	51	156	99.9021
	157	157	46.1012	51.1667	157	99.9019
	158	158	46.2536	51.3333	158	99.9017
	159	159	46.3983	51.5	159	99.9014
	160	160	46.5502	51.6667	160	99.9013
	161	161	46.6939	51.8333	161	99.9012
	162	162	46.85	52	162	99.9009
	163	163	46.992	52.1667	163	99.9009
	164	164	47.1345	52.3333	164	99.9008
	165	165	47.2892	52.5	165	99.9006
	166	166	47.4441	52.6667	166	99.9006
	167	167	47.5996	52.8333	167	99.9007
	168	168	47.7538	53	168	99.9006
	169	169	47.8894	53.1667	169	99.9005
	170	170	48.0272	53.3333	170	99.9006
	171	171	48.1711	53.5	171	99.9005
	172	172	48.3434	53.6667	172	99.9004
	173	173	48.4925	53.8333	173	99.9003
	174	174	48.6483	54	174	99.8998
	175	175	48.7765	54.1667	175	99.8996
	176	176	48.9305	54.3333	176	99.8994
	177	177	49.0826	54.5	177	99.8993
	178	178	49.2383	54.6667	178	99.8991
	179	179	49.3839	54.8333	179	99.899
	180	180	49.5488	55	180	99.8989
	181	181	49.6936	55.1667	181	99.8989
	182	182	49.8406	55.3333	182	99.899
	183	183	49.991	55.5	183	99.8992
	184	184	50.1482	55.6667	184	99.8992
	185	185	50.3083	55.8333	185	99.8992
	186	186	50.454	56	186	99.8995
	187	187	50.5944	56.1667	187	99.8996
	188	188	50.7439	56.3333	188	99.8996
	189	189	50.9016	56.5	189	99.8997
	190	190	51.0598	56.6667	190	99.8996
	191	191	51.2066	56.8333	191	99.8996
	192	192	51.3627	57	192	99.8995
	193	193	51.5112	57.1667	193	99.8994
	194	194	51.6653	57.3333	194	99.8993
	195	195	51.8203	57.5	195	99.8992
	196	196	51.9737	57.6667	196	99.899
	197	197	52.1262	57.8333	197	99.8987
	198	198	52.2831	58	198	99.8987
	199	199	52.4273	58.1667	199	99.8986
	200	200	52.5796	58.3333	200	99.8986
	201	201	52.7336	58.5	201	99.8986
	202	202	52.8889	58.6667	202	99.8987
	203	203	53.0444	58.8333	203	99.8986
	204	204	53.2048	59	204	99.8986
	205	205	53.348	59.1667	205	99.8986
	206	206	53.4984	59.3333	206	99.8985
	207	207	53.659	59.5	207	99.8984
	208	208	53.8121	59.6667	208	99.8984
	209	209	53.953	59.8333	209	99.8984
	210	210	54.121	60	210	99.8984
	211	211	54.2727	60.1667	211	99.8984
	212	212	54.4248	60.3333	212	99.8983
	213	213	54.5698	60.5	213	99.8984
	214	214	54.7304	60.6667	214	99.8981
	215	215	54.8894	60.8333	215	99.8979
	216	216	55.0467	61	216	99.8978
	217	217	55.2029	61.1667	217	99.8977
	218	218	55.3507	61.3333	218	99.8975
	219	219	55.5105	61.5	219	99.8975
	220	220	55.6529	61.6667	220	99.8976
	221	221	55.8246	61.8333	221	99.8978
	222	222	55.9677	62	222	99.8979
	223	223	56.1312	62.1667	223	99.8979
	224	224	56.2832	62.3333	224	99.8979
	225	225	56.4456	62.5	225	99.8976
	226	226	56.5942	62.6667	226	99.8969
	227	227	56.7502	62.8333	227	99.8966
	228	228	56.9094	63	228	99.8965
	229	229	57.0624	63.1667	229	99.8961
	230	230	57.2137	63.3333	230	99.8958
	231	231	57.3692	63.5	231	99.8957
	232	232	57.5274	63.6667	232	99.8956
	233	233	57.6924	63.8333	233	99.8954
	234	234	57.8499	64	234	99.8953
	235	235	58.0043	64.1667	235	99.8956
	236	236	58.1611	64.3333	236	99.8956
	237	237	58.3089	64.5	237	99.8953
	238	238	58.4748	64.6667	238	99.8953
	239	239	58.6312	64.8333	239	99.8956
	240	240	58.7932	65	240	99.8954
	241	241	58.9391	65.1667	241	99.8951
	242	242	59.1137	65.3333	242	99.8952
	243	243	59.2739	65.5	243	99.8953
	244	244	59.4256	65.6667	244	99.8951
	245	245	59.5798	65.8333	245	99.8947
	246	246	59.7366	66	246	99.8947
	247	247	59.8983	66.1667	247	99.8947
	248	248	60.0494	66.3333	248	99.8943
	249	249	60.2021	66.5	249	99.894
	250	250	60.3705	66.6667	250	99.8941
	251	251	60.5357	66.8333	251	99.8941
	252	252	60.6856	67	252	99.8937
	253	253	60.8431	67.1667	253	99.8935
	254	254	60.9967	67.3333	254	99.8932
	255	255	61.1505	67.5	255	99.8929
	256	256	61.3191	67.6667	256	99.8925
	257	257	61.4825	67.8333	257	99.8919
	258	258	61.641	68	258	99.8913
	259	259	61.7983	68.1667	259	99.8906
	260	260	61.9567	68.3333	260	99.8901
	261	261	62.1139	68.5	261	99.8897
	262	262	62.2643	68.6667	262	99.8893
	263	263	62.439	68.8333	263	99.8893
	264	264	62.5938	69	264	99.8892
	265	265	62.7435	69.1667	265	99.8889
	266	266	62.9157	69.3333	266	99.8885
	267	267	63.0747	69.5	267	99.8885
	268	268	63.2355	69.6667	268	99.8884
	269	269	63.3941	69.8333	269	99.888
	270	270	63.5528	70	270	99.8872
	271	271	63.7023	70.1667	271	99.8869
	272	272	63.8679	70.3333	272	99.8867
	273	273	64.0314	70.5	273	99.8863
	274	274	64.1757	70.6667	274	99.8856
	275	275	64.3481	70.8333	275	99.8854
	276	276	64.5119	71	276	99.8852
	277	277	64.6623	71.1667	277	99.8849
	278	278	64.8223	71.3333	278	99.8844
	279	279	64.9913	71.5	279	99.884
	280	280	65.1439	71.6667	280	99.8834
	281	281	65.2989	71.8333	281	99.8829
	282	282	65.4697	72	282	99.8823
	283	283	65.6343	72.1667	283	99.8814
	284	284	65.7942	72.3333	284	99.8804
	285	285	65.9609	72.5	285	99.8797
	286	286	66.1101	72.6667	286	99.8793
	287	287	66.2737	72.8333	287	99.8788
	288	288	66.4589	73	288	99.8782
	289	289	66.5978	73.1667	289	99.8775
	290	290	66.7629	73.3333	290	99.8772
	291	291	66.9256	73.5	291	99.877
	292	292	67.0809	73.6667	292	99.8764
	293	293	67.2372	73.8333	293	99.8758
	294	294	67.4085	74	294	99.8754
	295	295	67.5643	74.1667	295	99.8753
	296	296	67.7186	74.3333	296	99.8749
	297	297	67.8851	74.5	297	99.8745
	298	298	68.047	74.6667	298	99.874
	299	299	68.2201	74.8333	299	99.8737
	300	300	68.3803	75	300	99.8732
	301	301	68.5413	75.1667	301	99.8727
	302	302	68.6971	75.3333	302	99.8721
	303	303	68.8563	75.5	303	99.8709
	304	304	69.0163	75.6667	304	99.8701
	305	305	69.1934	75.8333	305	99.8698
	306	306	69.3548	76	306	99.8696
	307	307	69.5205	76.1667	307	99.8692
	308	308	69.6772	76.3333	308	99.8688
	309	309	69.8433	76.5	309	99.8687
	310	310	70.0068	76.6667	310	99.8688
	311	311	70.1551	76.8333	311	99.8687
	312	312	70.3232	77	312	99.8682
	313	313	70.4742	77.1667	313	99.8677
	314	314	70.6442	77.3333	314	99.8673
	315	315	70.8144	77.5	315	99.8672
	316	316	70.9755	77.6667	316	99.8673
	317	317	71.1457	77.8333	317	99.8672
	318	318	71.2998	78	318	99.8668
	319	319	71.4699	78.1667	319	99.8674
	320	320	71.6325	78.3333	320	99.8673
	321	321	71.797	78.5	321	99.8669
	322	322	71.9492	78.6667	322	99.8664
	323	323	72.1047	78.8333	323	99.8651
	324	324	72.2834	79	324	99.8641
	325	325	72.446	79.1667	325	99.8634
	326	326	72.6025	79.3333	326	99.8629
	327	327	72.7734	79.5	327	99.8624
	328	328	72.9334	79.6667	328	99.8622
	329	329	73.0995	79.8333	329	99.8618
	330	330	73.2662	80	330	99.8615
	331	331	73.4192	80.1667	331	99.8614
	332	332	73.5868	80.3333	332	99.8612
	333	333	73.7466	80.5	333	99.8606
	334	334	73.9128	80.6667	334	99.8601
	335	335	74.0817	80.8333	335	99.8599
	336	336	74.2543	81	336	99.8597
	337	337	74.4164	81.1667	337	99.8597
	338	338	74.5828	81.3333	338	99.8597
	339	339	74.7419	81.5	339	99.8599
	340	340	74.9127	81.6667	340	99.8607
	341	341	75.0792	81.8333	341	99.8609
	342	342	75.2485	82	342	99.861
	343	343	75.415	82.1667	343	99.861
	344	344	75.5722	82.3333	344	99.8603
	345	345	75.7337	82.5	345	99.8599
	346	346	75.8992	82.6667	346	99.86
	347	347	76.0754	82.8333	347	99.8601
	348	348	76.2397	83	348	99.8603
	349	349	76.4107	83.1667	349	99.8608
	350	350	76.571	83.3333	350	99.8613
	351	351	76.7338	83.5	351	99.8617
	352	352	76.9175	83.6667	352	99.8631
	353	353	77.0782	83.8333	353	99.864
	354	354	77.2573	84	354	99.8643
	355	355	77.4217	84.1667	355	99.8647
	356	356	77.5939	84.3333	356	99.8652
	357	357	77.7563	84.5	357	99.8657
	358	358	77.9346	84.6667	358	99.8659
	359	359	78.1	84.8333	359	99.866
	360	360	78.2698	85	360	99.8667
	361	361	78.454	85.1667	361	99.8673
	362	362	78.6243	85.3333	362	99.8676
	363	363	78.7959	85.5	363	99.8678
	364	364	78.9583	85.6667	364	99.8685
	365	365	79.1395	85.8333	365	99.869
	366	366	79.3082	86	366	99.8693
	367	367	79.4743	86.1667	367	99.8694
	368	368	79.6501	86.3333	368	99.8697
	369	369	79.8279	86.5	369	99.8698
	370	370	79.9949	86.6667	370	99.8698
	371	371	80.1703	86.8333	371	99.8695
	372	372	80.3471	87	372	99.8691
	373	373	80.5226	87.1667	373	99.8692
	374	374	80.6969	87.3333	374	99.8693
	375	375	80.8675	87.5	375	99.8691
	376	376	81.0479	87.6667	376	99.8686
	377	377	81.2142	87.8333	377	99.8684
	378	378	81.3897	88	378	99.8684
	379	379	81.5785	88.1667	379	99.8684
	380	380	81.7458	88.3333	380	99.8675
	381	381	81.9202	88.5	381	99.8669
	382	382	82.0842	88.6667	382	99.8667
	383	383	82.2649	88.8333	383	99.8669
	384	384	82.4367	89	384	99.8665
	385	385	82.6012	89.1667	385	99.866
	386	386	82.7863	89.3333	386	99.8654
	387	387	82.9722	89.5	387	99.8649
	388	388	83.1381	89.6667	388	99.8642
	389	389	83.3174	89.8333	389	99.8637
	390	390	83.4884	90	390	99.8633
	391	391	83.6547	90.1667	391	99.8629
	392	392	83.8396	90.3333	392	99.8625
	393	393	84.0119	90.5	393	99.8618
	394	394	84.1873	90.6667	394	99.8613
	395	395	84.3702	90.8333	395	99.861
	396	396	84.534	91	396	99.8609
	397	397	84.7178	91.1667	397	99.8604
	398	398	84.8939	91.3333	398	99.8597
	399	399	85.0657	91.5	399	99.8588
	400	400	85.2296	91.6667	400	99.8579
	401	401	85.4152	91.8333	401	99.8568
	402	402	85.5963	92	402	99.8557
	403	403	85.7688	92.1667	403	99.8547
	404	404	85.942	92.3333	404	99.854
	405	405	86.1145	92.5	405	99.8533
	406	406	86.2984	92.6667	406	99.8526
	407	407	86.461	92.8333	407	99.8516
	408	408	86.6428	93	408	99.8504
	409	409	86.8174	93.1667	409	99.8496
	410	410	86.9952	93.3333	410	99.8488
	411	411	87.1608	93.5	411	99.8481
	412	412	87.3456	93.6667	412	99.8473
	413	413	87.5226	93.8333	413	99.8466
	414	414	87.7019	94	414	99.8459
	415	415	87.8843	94.1667	415	99.8452
	416	416	88.0485	94.3333	416	99.8444
	417	417	88.2212	94.5	417	99.843
	418	418	88.4099	94.6667	418	99.8416
	419	419	88.5795	94.8333	419	99.84
	420	420	88.744	95	420	99.8381
	421	421	88.9214	95.1667	421	99.8361
	422	422	89.0975	95.3333	422	99.8348
	423	423	89.2625	95.5	423	99.8334
	424	424	89.446	95.6667	424	99.832
	425	425	89.6181	95.8333	425	99.8313
	426	426	89.793	96	426	99.83
	427	427	89.9799	96.1667	427	99.8284
	428	428	90.1629	96.3333	428	99.8266
	429	429	90.3332	96.5	429	99.8244
	430	430	90.5089	96.6667	430	99.8227
	431	431	90.683	96.8333	431	99.8211
	432	432	90.8544	97	432	99.8197
	433	433	91.021	97.1667	433	99.8188
	434	434	91.2001	97.3333	434	99.8178
	435	435	91.3814	97.5	435	99.8171
	436	436	91.5565	97.6667	436	99.8165
	437	437	91.743	97.8333	437	99.8159
	438	438	91.9011	98	438	99.8148
	439	439	92.0864	98.1667	439	99.8136
	440	440	92.2589	98.3333	440	99.8125
	441	441	92.4329	98.5	441	99.8106
	442	442	92.6094	98.6667	442	99.8088
	443	443	92.7745	98.8333	443	99.807
	444	444	92.9534	99	444	99.8052
	445	445	93.1339	99.1667	445	99.804
	446	446	93.3087	99.3333	446	99.803
	447	447	93.4875	99.5	447	99.802
	448	448	93.6655	99.6667	448	99.801
	449	449	93.8388	99.8333	449	99.8009
	450	450	94.015	100	450	99.8003
	451	451	94.1849	100.167	451	99.7994
	452	452	94.3511	100.333	452	99.7982
	453	453	94.5344	100.5	453	99.7966
	454	454	94.7163	100.667	454	99.7952
	455	455	94.878	100.833	455	99.7938
	456	456	95.0531	101	456	99.7923
	457	457	95.2257	101.167	457	99.7902
	458	458	95.4022	101.333	458	99.7883
	459	459	95.5843	101.5	459	99.7865
	460	460	95.7545	101.667	460	99.7847
	461	461	95.9366	101.833	461	99.7824
	462	462	96.1123	102	462	99.7806
	463	463	96.2923	102.167	463	99.7794
	464	464	96.4616	102.333	464	99.7785
	465	465	96.6343	102.5	465	99.7777
	466	466	96.8062	102.667	466	99.7767
	467	467	96.9873	102.833	467	99.7756
	468	468	97.1507	103	468	99.7746
	469	469	97.3261	103.167	469	99.7735
	470	470	97.4961	103.333	470	99.7721
	471	471	97.6754	103.5	471	99.7704
	472	472	97.8553	103.667	472	99.7688
	473	473	98.027	103.833	473	99.7669
	474	474	98.2036	104	474	99.765
	475	475	98.38	104.167	475	99.7629
	476	476	98.5529	104.333	476	99.7609
	477	477	98.7271	104.5	477	99.759
	478	478	98.8967	104.667	478	99.7572
	479	479	99.0705	104.833	479	99.7553
	480	480	99.2542	105	480	99.7532
	481	481	99.4239	105.167	481	99.7514
	482	482	99.6028	105.333	482	99.7496
	483	483	99.7778	105.5	483	99.7479
	484	484	99.9467	105.667	484	99.7461
	485	485	100.123	105.833	485	99.7441
	486	486	100.298	106	486	99.7422
	487	487	100.466	106.167	487	99.7404
	488	488	100.645	106.333	488	99.7389
	489	489	100.827	106.5	489	99.7374
	490	490	101	106.667	490	99.7364
	491	491	101.18	106.833	491	99.7355
	492	492	101.348	107	492	99.7344
	493	493	101.526	107.167	493	99.7331
	494	494	101.695	107.333	494	99.732
	495	495	101.862	107.5	495	99.7308
	496	496	102.045	107.667	496	99.7295
	497	497	102.218	107.833	497	99.7283
	498	498	102.395	108	498	99.7263
	499	499	102.57	108.167	499	99.7245
	500	500	102.743	108.333	500	99.7228
	501	501	102.919	108.5	501	99.7213
	502	502	103.075	108.667	502	99.7195
	503	503	103.262	108.833	503	99.7175
	504	504	103.434	109	504	99.7155
	505	505	103.605	109.167	505	99.7135
	506	506	103.788	109.333	506	99.7116
	507	507	103.958	109.5	507	99.7097
	508	508	104.13	109.667	508	99.7077
	509	509	104.306	109.833	509	99.7056
	510	510	104.48	110	510	99.7039
	511	511	104.656	110.167	511	99.7018
	512	512	104.827	110.333	512	99.6992
	513	513	104.991	110.5	513	99.6963
	514	514	105.168	110.667	514	99.6936
	515	515	105.347	110.833	515	99.6916
	516	516	105.52	111	516	99.6899
	517	517	105.69	111.167	517	99.6879
	518	518	105.869	111.333	518	99.6857
	519	519	106.051	111.5	519	99.6832
	520	520	106.225	111.667	520	99.6807
	521	521	106.399	111.833	521	99.6783
	522	522	106.559	112	522	99.675
	523	523	106.735	112.167	523	99.6722
	524	524	106.911	112.333	524	99.6696
	525	525	107.085	112.5	525	99.6672
	526	526	107.255	112.667	526	99.6657
	527	527	107.43	112.833	527	99.6639
	528	528	107.599	113	528	99.6619
	529	529	107.783	113.167	529	99.6599
	530	530	107.951	113.333	530	99.6584
	531	531	108.117	113.5	531	99.6568
	532	532	108.304	113.667	532	99.6549
	533	533	108.471	113.833	533	99.6528
	534	534	108.646	114	534	99.6508
	535	535	108.819	114.167	535	99.6488
	536	536	109	114.333	536	99.6467
	537	537	109.174	114.5	537	99.6444
	538	538	109.35	114.667	538	99.6421
	539	539	109.514	114.833	539	99.64
	540	540	109.685	115	540	99.6381
	541	541	109.864	115.167	541	99.6362
	542	542	110.044	115.333	542	99.6342
	543	543	110.211	115.5	543	99.6322
	544	544	110.385	115.667	544	99.6302
	545	545	110.559	115.833	545	99.6281
	546	546	110.733	116	546	99.6252
	547	547	110.907	116.167	547	99.6222
	548	548	111.087	116.333	548	99.6193
	549	549	111.258	116.5	549	99.6164
	550	550	111.424	116.667	550	99.6133
	551	551	111.602	116.833	551	99.611
	552	552	111.778	117	552	99.609
	553	553	111.945	117.167	553	99.6073
	554	554	112.121	117.333	554	99.6065
	555	555	112.297	117.5	555	99.6049
	556	556	112.474	117.667	556	99.6033
	557	557	112.639	117.833	557	99.6017
	558	558	112.799	118	558	99.6
	559	559	112.994	118.167	559	99.5975
	560	560	113.156	118.333	560	99.5949
	561	561	113.326	118.5	561	99.5922
	562	562	113.503	118.667	562	99.5896
	563	563	113.681	118.833	563	99.5865
	564	564	113.851	119	564	99.5835
	565	565	114.03	119.167	565	99.5807
	566	566	114.2	119.333	566	99.5779
	567	567	114.366	119.5	567	99.5751
	568	568	114.546	119.667	568	99.572
	569	569	114.712	119.833	569	99.5686
	570	570	114.887	120	570	99.5652
	571	571	115.056	120.167	571	99.5617
	572	572	115.233	120.333	572	99.5583
	573	573	115.409	120.5	573	99.555
	574	574	115.579	120.667	574	99.5519
	575	575	115.762	120.833	575	99.5495
	576	576	115.937	121	576	99.547
	577	577	116.106	121.167	577	99.5443
	578	578	116.276	121.333	578	99.5415
	579	579	116.439	121.5	579	99.5388
	580	580	116.618	121.667	580	99.5359
	581	581	116.788	121.833	581	99.533
	582	582	116.954	122	582	99.53
	583	583	117.124	122.167	583	99.5264
	584	584	117.306	122.333	584	99.5234
	585	585	117.476	122.5	585	99.5206
	586	586	117.655	122.667	586	99.5177
	587	587	117.83	122.833	587	99.5144
	588	588	118.004	123	588	99.5111
	589	589	118.184	123.167	589	99.5079
	590	590	118.353	123.333	590	99.5048
	591	591	118.522	123.5	591	99.5009
	592	592	118.695	123.667	592	99.4976
	593	593	118.864	123.833	593	99.4946
	594	594	119.034	124	594	99.4916
	595	595	119.21	124.167	595	99.4889
	596	596	119.38	124.333	596	99.4861
	597	597	119.551	124.5	597	99.4833
	598	598	119.717	124.667	598	99.4803
	599	599	119.895	124.833	599	99.4777
	600	600	120.073	125	600	99.475
	601	601	120.247	125.167	601	99.4718
	602	602	120.425	125.333	602	99.4683
	603	603	120.592	125.5	603	99.4649
	604	604	120.769	125.667	604	99.4618
	605	605	120.939	125.833	605	99.4588
	606	606	121.114	126	606	99.4557
	607	607	121.292	126.167	607	99.4518
	608	608	121.454	126.333	608	99.448
	609	609	121.634	126.5	609	99.4445
	610	610	121.802	126.667	610	99.4411
	611	611	121.98	126.833	611	99.437
	612	612	122.143	127	612	99.433
	613	613	122.313	127.167	613	99.4291
	614	614	122.491	127.333	614	99.4257
	615	615	122.66	127.5	615	99.4235
	616	616	122.826	127.667	616	99.4216
	617	617	123.003	127.833	617	99.4197
	618	618	123.176	128	618	99.4175
	619	619	123.348	128.167	619	99.4164
	620	620	123.52	128.333	620	99.4144
	621	621	123.702	128.5	621	99.4119
	622	622	123.875	128.667	622	99.409
	623	623	124.051	128.833	623	99.4042
	624	624	124.222	129	624	99.4003
	625	625	124.393	129.167	625	99.3963
	626	626	124.563	129.333	626	99.3921
	627	627	124.735	129.5	627	99.3876
	628	628	124.9	129.667	628	99.3832
	629	629	125.08	129.833	629	99.3789
	630	630	125.253	130	630	99.3744
	631	631	125.431	130.167	631	99.37
	632	632	125.599	130.333	632	99.3652
	633	633	125.772	130.5	633	99.3606
	634	634	125.943	130.667	634	99.3561
	635	635	126.111	130.833	635	99.352
	636	636	126.28	131	636	99.3472
	637	637	126.449	131.167	637	99.3424
	638	638	126.63	131.333	638	99.3378
	639	639	126.8	131.5	639	99.3338
	640	640	126.967	131.667	640	99.3294
	641	641	127.144	131.833	641	99.3249
	642	642	127.32	132	642	99.3205
	643	643	127.485	132.167	643	99.3166
	644	644	127.669	132.333	644	99.3127
	645	645	127.835	132.5	645	99.3086
	646	646	128.017	132.667	646	99.3046
	647	647	128.185	132.833	647	99.3007
	648	648	128.359	133	648	99.2964
	649	649	128.531	133.167	649	99.2923
	650	650	128.702	133.333	650	99.2885
	651	651	128.875	133.5	651	99.2848
	652	652	129.045	133.667	652	99.2805
	653	653	129.208	133.833	653	99.2762
	654	654	129.384	134	654	99.2721
	655	655	129.557	134.167	655	99.2682
	656	656	129.733	134.333	656	99.2636
	657	657	129.909	134.5	657	99.2591
	658	658	130.071	134.667	658	99.2547
	659	659	130.242	134.833	659	99.2504
	660	660	130.419	135	660	99.2461
	661	661	130.597	135.167	661	99.2421
	662	662	130.77	135.333	662	99.2379
	663	663	130.931	135.5	663	99.2334
	664	664	131.104	135.667	664	99.2291
	665	665	131.287	135.833	665	99.225
	666	666	131.455	136	666	99.2207
	667	667	131.638	136.167	667	99.2161
	668	668	131.797	136.333	668	99.2114
	669	669	131.969	136.5	669	99.2069
	670	670	132.147	136.667	670	99.2025
	671	671	132.323	136.833	671	99.1981
	672	672	132.491	137	672	99.194
	673	673	132.663	137.167	673	99.1894
	674	674	132.843	137.333	674	99.1848
	675	675	133.007	137.5	675	99.1804
	676	676	133.185	137.667	676	99.1759
	677	677	133.35	137.833	677	99.1714
	678	678	133.522	138	678	99.1667
	679	679	133.697	138.167	679	99.1618
	680	680	133.868	138.333	680	99.1569
	681	681	134.042	138.5	681	99.1523
	682	682	134.208	138.667	682	99.1474
	683	683	134.397	138.833	683	99.1422
	684	684	134.56	139	684	99.1372
	685	685	134.735	139.167	685	99.1323
	686	686	134.906	139.333	686	99.1275
	687	687	135.079	139.5	687	99.123
	688	688	135.247	139.667	688	99.1182
	689	689	135.418	139.833	689	99.1133
	690	690	135.6	140	690	99.1085
	691	691	135.764	140.167	691	99.1039
	692	692	135.936	140.333	692	99.0991
	693	693	136.112	140.5	693	99.0944
	694	694	136.293	140.667	694	99.0895
	695	695	136.459	140.833	695	99.0845
	696	696	136.626	141	696	99.0798
	697	697	136.797	141.167	697	99.075
	698	698	136.97	141.333	698	99.0705
	699	699	137.137	141.5	699	99.0661
	700	700	137.315	141.667	700	99.0615
	701	701	137.482	141.833	701	99.0567
	702	702	137.648	142	702	99.0518
	703	703	137.832	142.167	703	99.0469
	704	704	138.004	142.333	704	99.0421
	705	705	138.176	142.5	705	99.0374
	706	706	138.349	142.667	706	99.0324
	707	707	138.52	142.833	707	99.0273
	708	708	138.694	143	708	99.0217
	709	709	138.859	143.167	709	99.016
	710	710	139.043	143.333	710	99.0104
	711	711	139.215	143.5	711	99.0048
	712	712	139.381	143.667	712	98.9982
	713	713	139.561	143.833	713	98.9922
	714	714	139.726	144	714	98.9869
	715	715	139.906	144.167	715	98.9826
	716	716	140.073	144.333	716	98.98
	717	717	140.233	144.5	717	98.9771
	718	718	140.414	144.667	718	98.974
	719	719	140.585	144.833	719	98.9706
	720	720	140.756	145	720	98.9672
	721	721	140.93	145.167	721	98.9636
	722	722	141.103	145.333	722	98.9593
	723	723	141.267	145.5	723	98.9546
	724	724	141.446	145.667	724	98.9495
	725	725	141.627	145.833	725	98.9425
	726	726	141.798	146	726	98.9367
	727	727	141.962	146.167	727	98.9311
	728	728	142.142	146.333	728	98.9257
	729	729	142.307	146.5	729	98.9206
	730	730	142.485	146.667	730	98.9155
	731	731	142.663	146.833	731	98.9103
	732	732	142.834	147	732	98.9051
	733	733	142.996	147.167	733	98.9004
	734	734	143.17	147.333	734	98.8954
	735	735	143.34	147.5	735	98.8902
	736	736	143.515	147.667	736	98.8849
	737	737	143.682	147.833	737	98.88
	738	738	143.86	148	738	98.8751
	739	739	144.032	148.167	739	98.8703
	740	740	144.196	148.333	740	98.8654
	741	741	144.379	148.5	741	98.8611
	742	742	144.547	148.667	742	98.8567
	743	743	144.717	148.833	743	98.8522
	744	744	144.889	149	744	98.8478
	745	745	145.058	149.167	745	98.8433
	746	746	145.234	149.333	746	98.8388
	747	747	145.409	149.5	747	98.8338
	748	748	145.588	149.667	748	98.8287
	749	749	145.759	149.833	749	98.8229
	750	750	145.926	150	750	98.817
	751	751	146.099	150.167	751	98.8108
	752	752	146.261	150.333	752	98.8045
	753	753	146.435	150.5	753	98.797
	754	754	146.616	150.667	754	98.7899
	755	755	146.786	150.833	755	98.7828
	756	756	146.96	151	756	98.7759
	757	757	147.121	151.167	757	98.7693
	758	758	147.289	151.333	758	98.7627
	759	759	147.47	151.5	759	98.7561
	760	760	147.645	151.667	760	98.7494
	761	761	147.811	151.833	761	98.7437
	762	762	147.989	152	762	98.7378
	763	763	148.157	152.167	763	98.7321
	764	764	148.333	152.333	764	98.7263
	765	765	148.505	152.5	765	98.7206
	766	766	148.675	152.667	766	98.7147
	767	767	148.845	152.833	767	98.7089
	768	768	149.022	153	768	98.7032
	769	769	149.191	153.167	769	98.6972
	770	770	149.367	153.333	770	98.6913
	771	771	149.539	153.5	771	98.6854
	772	772	149.703	153.667	772	98.6796
	773	773	149.883	153.833	773	98.6742
	774	774	150.05	154	774	98.6687
	775	775	150.223	154.167	775	98.6632
	776	776	150.395	154.333	776	98.6575
	777	777	150.557	154.5	777	98.6519
	778	778	150.733	154.667	778	98.6462
	779	779	150.91	154.833	779	98.6406
	780	780	151.082	155	780	98.6349
	781	781	151.252	155.167	781	98.6285
	782	782	151.435	155.333	782	98.6222
	783	783	151.609	155.5	783	98.616
	784	784	151.772	155.667	784	98.6099
	785	785	151.949	155.833	785	98.6037
	786	786	152.123	156	786	98.5977
	787	787	152.291	156.167	787	98.5916
	788	788	152.457	156.333	788	98.5854
	789	789	152.634	156.5	789	98.5793
	790	790	152.799	156.667	790	98.5736
	791	791	152.984	156.833	791	98.5675
	792	792	153.153	157	792	98.5612
	793	793	153.322	157.167	793	98.5549
	794	794	153.494	157.333	794	98.5486
	795	795	153.667	157.5	795	98.5426
	796	796	153.835	157.667	796	98.5366
	797	797	154.007	157.833	797	98.5305
	798	798	154.176	158	798	98.5243
	799	799	154.351	158.167	799	98.5179
	800	800	154.526	158.333	800	98.5115
	801	801	154.69	158.5	801	98.5052
	802	802	154.864	158.667	802	98.4986
	803	803	155.048	158.833	803	98.492
	804	804	155.223	159	804	98.4853
	805	805	155.386	159.167	805	98.4786
	806	806	155.568	159.333	806	98.4723
	807	807	155.732	159.5	807	98.466
	808	808	155.904	159.667	808	98.4596
	809	809	156.067	159.833	809	98.4532
	810	810	156.239	160	810	98.4464
	811	811	156.409	160.167	811	98.4398
	812	812	156.595	160.333	812	98.4332
	813	813	156.76	160.5	813	98.4268
	814	814	156.928	160.667	814	98.4197
	815	815	157.1	160.833	815	98.4126
	816	816	157.275	161	816	98.4057
	817	817	157.443	161.167	817	98.3987
	818	818	157.618	161.333	818	98.3919
	819	819	157.784	161.5	819	98.3851
	820	820	157.961	161.667	820	98.3782
	821	821	158.131	161.833	821	98.3711
	822	822	158.303	162	822	98.3644
	823	823	158.484	162.167	823	98.3576
	824	824	158.656	162.333	824	98.3509
	825	825	158.825	162.5	825	98.3444
	826	826	159.003	162.667	826	98.3379
	827	827	159.17	162.833	827	98.3312
	828	828	159.346	163	828	98.3241
	829	829	159.525	163.167	829	98.317
	830	830	159.686	163.333	830	98.31
	831	831	159.859	163.5	831	98.3031
	832	832	160.037	163.667	832	98.2961
	833	833	160.205	163.833	833	98.2889
	834	834	160.369	164	834	98.2816
	835	835	160.54	164.167	835	98.2743
	836	836	160.725	164.333	836	98.267
	837	837	160.891	164.5	837	98.2598
	838	838	161.058	164.667	838	98.2519
	839	839	161.236	164.833	839	98.2441
	840	840	161.404	165	840	98.2364
	841	841	161.575	165.167	841	98.2289
	842	842	161.751	165.333	842	98.2214
	843	843	161.929	165.5	843	98.2142
	844	844	162.095	165.667	844	98.2071
	845	845	162.271	165.833	845	98.1998
	846	846	162.442	166	846	98.1925
	847	847	162.612	166.167	847	98.185
	848	848	162.782	166.333	848	98.1774
	849	849	162.951	166.5	849	98.1698
	850	850	163.137	166.667	850	98.1614
	851	851	163.296	166.833	851	98.1532
	852	852	163.482	167	852	98.1451
	853	853	163.651	167.167	853	98.137
	854	854	163.818	167.333	854	98.1293
	855	855	163.983	167.5	855	98.1217
	856	856	164.164	167.667	856	98.1143
	857	857	164.332	167.833	857	98.1072
	858	858	164.503	168	858	98.1008
	859	859	164.68	168.167	859	98.0939
	860	860	164.844	168.333	860	98.0867
	861	861	165.014	168.5	861	98.0792
	862	862	165.195	168.667	862	98.0714
	863	863	165.366	168.833	863	98.0638
	864	864	165.544	169	864	98.0561
	865	865	165.715	169.167	865	98.0483
	866	866	165.89	169.333	866	98.0394
	867	867	166.053	169.5	867	98.0307
	868	868	166.219	169.667	868	98.0222
	869	869	166.401	169.833	869	98.0135
	870	870	166.565	170	870	98.0039
	871	871	166.738	170.167	871	97.9946
	872	872	166.912	170.333	872	97.9856
	873	873	167.089	170.5	873	97.9768
	874	874	167.256	170.667	874	97.9681
	875	875	167.428	170.833	875	97.9592
	876	876	167.588	171	876	97.9502
	877	877	167.768	171.167	877	97.9412
	878	878	167.941	171.333	878	97.9327
	879	879	168.107	171.5	879	97.924
	880	880	168.285	171.667	880	97.9154
	881	881	168.464	171.833	881	97.9065
	882	882	168.623	172	882	97.8975
	883	883	168.801	172.167	883	97.8885
	884	884	168.971	172.333	884	97.8795
	885	885	169.149	172.5	885	97.8704
	886	886	169.313	172.667	886	97.861
	887	887	169.497	172.833	887	97.8511
	888	888	169.66	173	888	97.8415
	889	889	169.829	173.167	889	97.8322
	890	890	170.004	173.333	890	97.8229
	891	891	170.175	173.5	891	97.8134
	892	892	170.342	173.667	892	97.8039
	893	893	170.513	173.833	893	97.7943
	894	894	170.693	174	894	97.7848
	895	895	170.863	174.167	895	97.7756
	896	896	171.036	174.333	896	97.7663
	897	897	171.205	174.5	897	97.7567
	898	898	171.375	174.667	898	97.7471
	899	899	171.55	174.833	899	97.7374
	900	900	171.722	175	900	97.7277
	901	901	171.89	175.167	901	97.7182
	902	902	172.055	175.333	902	97.7088
	903	903	172.237	175.5	903	97.6991
	904	904	172.415	175.667	904	97.6891
	905	905	172.576	175.833	905	97.6792
	906	906	172.756	176	906	97.6693
	907	907	172.922	176.167	907	97.6594
	908	908	173.093	176.333	908	97.6496
	909	909	173.267	176.5	909	97.6396
	910	910	173.442	176.667	910	97.6295
	911	911	173.611	176.833	911	97.6193
	912	912	173.783	177	912	97.6091
	913	913	173.953	177.167	913	97.599
	914	914	174.123	177.333	914	97.589
	915	915	174.295	177.5	915	97.5789
	916	916	174.475	177.667	916	97.5686
	917	917	174.644	177.833	917	97.5581
	918	918	174.816	178	918	97.5477
	919	919	174.998	178.167	919	97.5374
	920	920	175.161	178.333	920	97.5273
	921	921	175.341	178.5	921	97.5171
	922	922	175.52	178.667	922	97.5068
	923	923	175.675	178.833	923	97.4963
	924	924	175.846	179	924	97.4856
	925	925	176.02	179.167	925	97.475
	926	926	176.191	179.333	926	97.4642
	927	927	176.368	179.5	927	97.4526
	928	928	176.538	179.667	928	97.4412
	929	929	176.717	179.833	929	97.43
	930	930	176.893	180	930	97.4189
	931	931	177.068	180.167	931	97.4077
	932	932	177.234	180.333	932	97.3966
	933	933	177.397	180.5	933	97.3853
	934	934	177.577	180.667	934	97.3739
	935	935	177.749	180.833	935	97.3628
	936	936	177.922	181	936	97.3516
	937	937	178.091	181.167	937	97.3404
	938	938	178.26	181.333	938	97.3293
	939	939	178.436	181.5	939	97.3176
	940	940	178.61	181.667	940	97.3058
	941	941	178.774	181.833	941	97.2942
	942	942	178.943	182	942	97.2826
	943	943	179.12	182.167	943	97.2709
	944	944	179.292	182.333	944	97.2595
	945	945	179.467	182.5	945	97.2479
	946	946	179.633	182.667	946	97.2362
	947	947	179.802	182.833	947	97.2248
	948	948	179.974	183	948	97.2133
	949	949	180.151	183.167	949	97.2017
	950	950	180.32	183.333	950	97.1901
	951	951	180.493	183.5	951	97.1783
	952	952	180.671	183.667	952	97.1658
	953	953	180.84	183.833	953	97.1535
	954	954	181.011	184	954	97.1414
	955	955	181.181	184.167	955	97.1293
	956	956	181.356	184.333	956	97.117
	957	957	181.521	184.5	957	97.1048
	958	958	181.699	184.667	958	97.0925
	959	959	181.869	184.833	959	97.0801
	960	960	182.041	185	960	97.0681
	961	961	182.212	185.167	961	97.0559
	962	962	182.391	185.333	962	97.0437
	963	963	182.56	185.5	963	97.0314
	964	964	182.726	185.667	964	97.0185
	965	965	182.902	185.833	965	97.0058
	966	966	183.072	186	966	96.9931
	967	967	183.234	186.167	967	96.9804
	968	968	183.413	186.333	968	96.9675
	969	969	183.594	186.5	969	96.9547
	970	970	183.762	186.667	970	96.9417
	971	971	183.941	186.833	971	96.9286
	972	972	184.113	187	972	96.916
	973	973	184.281	187.167	973	96.9034
	974	974	184.453	187.333	974	96.8907
	975	975	184.619	187.5	975	96.878
	976	976	184.788	187.667	976	96.8649
	977	977	184.963	187.833	977	96.8517
	978	978	185.136	188	978	96.8386
	979	979	185.306	188.167	979	96.8254
	980	980	185.48	188.333	980	96.8119
	981	981	185.657	188.5	981	96.7985
	982	982	185.828	188.667	982	96.7851
	983	983	185.99	188.833	983	96.7714
	984	984	186.169	189	984	96.758
	985	985	186.335	189.167	985	96.7445
	986	986	186.517	189.333	986	96.731
	987	987	186.688	189.5	987	96.7176
	988	988	186.854	189.667	988	96.7036
	989	989	187.028	189.833	989	96.6896
	990	990	187.217	190	990	96.6755
	991	991	187.371	190.167	991	96.6617
	992	992	187.536	190.333	992	96.6477
	993	993	187.713	190.5	993	96.634
	994	994	187.89	190.667	994	96.6204
	995	995	188.055	190.833	995	96.6066
	996	996	188.234	191	996	96.5928
	997	997	188.409	191.167	997	96.5787
	998	998	188.582	191.333	998	96.5646
	999	999	188.75	191.5	999	96.5506
	1000	1000	188.919	191.667	1000	96.5356
	1001	1001	189.092	191.833	1001	96.5209
	1002	1002	189.261	192	1002	96.5061
	1003	1003	189.433	192.167	1003	96.4913
	1004	1004	189.609	192.333	1004	96.4765
	1005	1005	189.779	192.5	1005	96.462
	1006	1006	189.953	192.667	1006	96.4477
	1007	1007	190.121	192.833	1007	96.4334
	1008	1008	190.295	193	1008	96.4191
	1009	1009	190.474	193.167	1009	96.4044
	1010	1010	190.637	193.333	1010	96.3896
	1011	1011	190.807	193.5	1011	96.3747
	1012	1012	190.979	193.667	1012	96.3597
	1013	1013	191.148	193.833	1013	96.3449
	1014	1014	191.316	194	1014	96.3298
	1015	1015	191.49	194.167	1015	96.3145
	1016	1016	191.66	194.333	1016	96.2993
	1017	1017	191.832	194.5	1017	96.2842
	1018	1018	192.011	194.667	1018	96.269
	1019	1019	192.181	194.833	1019	96.2539
	1020	1020	192.355	195	1020	96.2382
	1021	1021	192.523	195.167	1021	96.2223
	1022	1022	192.699	195.333	1022	96.2065
	1023	1023	192.878	195.5	1023	96.1907
	1024	1024	193.041	195.667	1024	96.1749
	1025	1025	193.212	195.833	1025	96.159
	1026	1026	193.387	196	1026	96.1431
	1027	1027	193.555	196.167	1027	96.127
	1028	1028	193.731	196.333	1028	96.1112
	1029	1029	193.901	196.5	1029	96.0951
	1030	1030	194.07	196.667	1030	96.0791
	1031	1031	194.233	196.833	1031	96.0631
	1032	1032	194.415	197	1032	96.047
	1033	1033	194.586	197.167	1033	96.0306
	1034	1034	194.76	197.333	1034	96.0142
	1035	1035	194.928	197.5	1035	95.9978
	1036	1036	195.102	197.667	1036	95.9816
	1037	1037	195.264	197.833	1037	95.9653
	1038	1038	195.442	198	1038	95.9488
	1039	1039	195.615	198.167	1039	95.932
	1040	1040	195.79	198.333	1040	95.9152
	1041	1041	195.966	198.5	1041	95.8983
	1042	1042	196.135	198.667	1042	95.8816
	1043	1043	196.301	198.833	1043	95.865
	1044	1044	196.473	199	1044	95.8485
	1045	1045	196.649	199.167	1045	95.8323
	1046	1046	196.812	199.333	1046	95.8162
	1047	1047	196.986	199.5	1047	95.7999
	1048	1048	197.156	199.667	1048	95.7835
	1049	1049	197.332	199.833	1049	95.7667
	1050	1050	197.501	200	1050	95.7498
	1051	1051	197.675	200.167	1051	95.7328
	1052	1052	197.843	200.333	1052	95.7158
	1053	1053	198.013	200.5	1053	95.6978
	1054	1054	198.193	200.667	1054	95.68
	1055	1055	198.355	200.833	1055	95.6621
	1056	1056	198.532	201	1056	95.6443
	1057	1057	198.705	201.167	1057	95.6264
	1058	1058	198.876	201.333	1058	95.6085
	1059	1059	199.059	201.5	1059	95.5903
	1060	1060	199.225	201.667	1060	95.5719
	1061	1061	199.395	201.833	1061	95.5536
	1062	1062	199.569	202	1062	95.5354
	1063	1063	199.737	202.167	1063	95.5175
	1064	1064	199.912	202.333	1064	95.4997
	1065	1065	200.087	202.5	1065	95.4821
	1066	1066	200.253	202.667	1066	95.4643
	1067	1067	200.414	202.833	1067	95.4461
	1068	1068	200.6	203	1068	95.4279
	1069	1069	200.774	203.167	1069	95.4097
	1070	1070	200.944	203.333	1070	95.3916
	1071	1071	201.109	203.5	1071	95.3734
	1072	1072	201.29	203.667	1072	95.3553
	1073	1073	201.457	203.833	1073	95.3365
	1074	1074	201.622	204	1074	95.3177
	1075	1075	201.788	204.167	1075	95.2988
	1076	1076	201.97	204.333	1076	95.28
	1077	1077	202.137	204.5	1077	95.261
	1078	1078	202.312	204.667	1078	95.2422
	1079	1079	202.492	204.833	1079	95.2231
	1080	1080	202.665	205	1080	95.2039
	1081	1081	202.83	205.167	1081	95.185
	1082	1082	202.998	205.333	1082	95.1661
	1083	1083	203.173	205.5	1083	95.1471
	1084	1084	203.335	205.667	1084	95.1281
	1085	1085	203.51	205.833	1085	95.1088
	1086	1086	203.683	206	1086	95.0893
	1087	1087	203.856	206.167	1087	95.0695
	1088	1088	204.025	206.333	1088	95.0497
	1089	1089	204.2	206.5	1089	95.0296
	1090	1090	204.366	206.667	1090	95.0098
	1091	1091	204.545	206.833	1091	94.9901
	1092	1092	204.719	207	1092	94.9705
	1093	1093	204.884	207.167	1093	94.9506
	1094	1094	205.057	207.333	1094	94.9306
	1095	1095	205.225	207.5	1095	94.9105
	1096	1096	205.393	207.667	1096	94.8904
	1097	1097	205.57	207.833	1097	94.8699
	1098	1098	205.742	208	1098	94.8493
	1099	1099	205.919	208.167	1099	94.8285
	1100	1100	206.085	208.333	1100	94.8076
	1101	1101	206.262	208.5	1101	94.7868
	1102	1102	206.432	208.667	1102	94.7663
	1103	1103	206.599	208.833	1103	94.7456
	1104	1104	206.769	209	1104	94.7247
	1105	1105	206.944	209.167	1105	94.7036
	1106	1106	207.116	209.333	1106	94.6824
	1107	1107	207.287	209.5	1107	94.6613
	1108	1108	207.465	209.667	1108	94.6403
	1109	1109	207.631	209.833	1109	94.6188
	1110	1110	207.81	210	1110	94.5978
	1111	1111	207.97	210.167	1111	94.5771
	1112	1112	208.144	210.333	1112	94.5564
	1113	1113	208.313	210.5	1113	94.5356
	1114	1114	208.478	210.667	1114	94.5149
	1115	1115	208.656	210.833	1115	94.4938
	1116	1116	208.83	211	1116	94.4727
	1117	1117	208.996	211.167	1117	94.4515
	1118	1118	209.17	211.333	1118	94.4299
	1119	1119	209.341	211.5	1119	94.4087
	1120	1120	209.519	211.667	1120	94.3874
	1121	1121	209.687	211.833	1121	94.3658
	1122	1122	209.857	212	1122	94.344
	1123	1123	210.032	212.167	1123	94.3218
	1124	1124	210.198	212.333	1124	94.2992
	1125	1125	210.367	212.5	1125	94.2767
	1126	1126	210.541	212.667	1126	94.2534
	1127	1127	210.713	212.833	1127	94.2306
	1128	1128	210.883	213	1128	94.2078
	1129	1129	211.052	213.167	1129	94.1851
	1130	1130	211.225	213.333	1130	94.1629
	1131	1131	211.4	213.5	1131	94.1404
	1132	1132	211.573	213.667	1132	94.1174
	1133	1133	211.748	213.833	1133	94.0941
	1134	1134	211.923	214	1134	94.0703
	1135	1135	212.095	214.167	1135	94.0466
	1136	1136	212.261	214.333	1136	94.0231
	1137	1137	212.426	214.5	1137	93.9997
	1138	1138	212.603	214.667	1138	93.9759
	1139	1139	212.779	214.833	1139	93.9522
	1140	1140	212.954	215	1140	93.9283
	1141	1141	213.118	215.167	1141	93.9043
	1142	1142	213.291	215.333	1142	93.8803
	1143	1143	213.46	215.5	1143	93.8563
	1144	1144	213.629	215.667	1144	93.8326
	1145	1145	213.804	215.833	1145	93.8089
	1146	1146	213.978	216	1146	93.7848
	1147	1147	214.145	216.167	1147	93.7603
	1148	1148	214.315	216.333	1148	93.7358
	1149	1149	214.483	216.5	1149	93.7112
	1150	1150	214.66	216.667	1150	93.6863
	1151	1151	214.832	216.833	1151	93.6617
	1152	1152	215.002	217	1152	93.637
	1153	1153	215.18	217.167	1153	93.6121
	1154	1154	215.341	217.333	1154	93.5869
	1155	1155	215.522	217.5	1155	93.5617
	1156	1156	215.692	217.667	1156	93.5364
	1157	1157	215.868	217.833	1157	93.511
	1158	1158	216.034	218	1158	93.4846
	1159	1159	216.204	218.167	1159	93.4585
	1160	1160	216.375	218.333	1160	93.4325
	1161	1161	216.556	218.5	1161	93.4066
	1162	1162	216.72	218.667	1162	93.3806
	1163	1163	216.901	218.833	1163	93.3549
	1164	1164	217.069	219	1164	93.3293
	1165	1165	217.234	219.167	1165	93.3034
	1166	1166	217.407	219.333	1166	93.2776
	1167	1167	217.581	219.5	1167	93.2514
	1168	1168	217.749	219.667	1168	93.2251
	1169	1169	217.917	219.833	1169	93.1988
	1170	1170	218.093	220	1170	93.172
	1171	1171	218.266	220.167	1171	93.1457
	1172	1172	218.437	220.333	1172	93.1194
	1173	1173	218.606	220.5	1173	93.0928
	1174	1174	218.78	220.667	1174	93.0663
	1175	1175	218.946	220.833	1175	93.0396
	1176	1176	219.123	221	1176	93.013
	1177	1177	219.295	221.167	1177	92.9863
	1178	1178	219.463	221.333	1178	92.9589
	1179	1179	219.636	221.5	1179	92.9315
	1180	1180	219.811	221.667	1180	92.9036
	1181	1181	219.985	221.833	1181	92.8757
	1182	1182	220.153	222	1182	92.8477
	1183	1183	220.321	222.167	1183	92.8193
	1184	1184	220.489	222.333	1184	92.7913
	1185	1185	220.662	222.5	1185	92.7635
	1186	1186	220.835	222.667	1186	92.7357
	1187	1187	221.007	222.833	1187	92.7079
	1188	1188	221.171	223	1188	92.6797
	1189	1189	221.353	223.167	1189	92.6513
	1190	1190	221.523	223.333	1190	92.6229
	1191	1191	221.701	223.5	1191	92.5938
	1192	1192	221.865	223.667	1192	92.5648
	1193	1193	222.04	223.833	1193	92.5356
	1194	1194	222.215	224	1194	92.5064
	1195	1195	222.384	224.167	1195	92.477
	1196	1196	222.556	224.333	1196	92.4478
	1197	1197	222.729	224.5	1197	92.4187
	1198	1198	222.886	224.667	1198	92.3897
	1199	1199	223.066	224.833	1199	92.3603
	1200	1200	223.232	225	1200	92.3305
	1201	1201	223.407	225.167	1201	92.3006
	1202	1202	223.582	225.333	1202	92.2707
	1203	1203	223.756	225.5	1203	92.2402
	1204	1204	223.926	225.667	1204	92.2101
	1205	1205	224.096	225.833	1205	92.1802
	1206	1206	224.265	226	1206	92.1502
	1207	1207	224.438	226.167	1207	92.1199
	1208	1208	224.602	226.333	1208	92.0894
	1209	1209	224.773	226.5	1209	92.0589
	1210	1210	224.95	226.667	1210	92.0284
	1211	1211	225.119	226.833	1211	91.9976
	1212	1212	225.294	227	1212	91.9671
	1213	1213	225.468	227.167	1213	91.9367
	1214	1214	225.634	227.333	1214	91.9061
	1215	1215	225.8	227.5	1215	91.8754
	1216	1216	225.98	227.667	1216	91.8443
	1217	1217	226.147	227.833	1217	91.8131
	1218	1218	226.311	228	1218	91.7818
	1219	1219	226.485	228.167	1219	91.7497
	1220	1220	226.663	228.333	1220	91.7181
	1221	1221	226.83	228.5	1221	91.6864
	1222	1222	227.005	228.667	1222	91.6545
	1223	1223	227.169	228.833	1223	91.6227
	1224	1224	227.339	229	1224	91.5907
	1225	1225	227.516	229.167	1225	91.5588
	1226	1226	227.688	229.333	1226	91.5269
	1227	1227	227.862	229.5	1227	91.4946
	1228	1228	228.028	229.667	1228	91.4624
	1229	1229	228.196	229.833	1229	91.4299
	1230	1230	228.364	230	1230	91.397
	1231	1231	228.532	230.167	1231	91.364
	1232	1232	228.705	230.333	1232	91.3309
	1233	1233	228.889	230.5	1233	91.2978
	1234	1234	229.06	230.667	1234	91.2647
	1235	1235	229.224	230.833	1235	91.2313
	1236	1236	229.392	231	1236	91.1986
	1237	1237	229.564	231.167	1237	91.1664
	1238	1238	229.734	231.333	1238	91.1346
	1239	1239	229.9	231.5	1239	91.1034
	1240	1240	230.075	231.667	1240	91.0716
	1241	1241	230.245	231.833	1241	91.0391
	1242	1242	230.419	232	1242	91.0062
	1243	1243	230.585	232.167	1243	90.9725
	1244	1244	230.764	232.333	1244	90.9387
	1245	1245	230.931	232.5	1245	90.9043
	1246	1246	231.105	232.667	1246	90.8694
	1247	1247	231.282	232.833	1247	90.8331
	1248	1248	231.447	233	1248	90.7977
	1249	1249	231.617	233.167	1249	90.7622
	1250	1250	231.781	233.333	1250	90.7265
	1251	1251	231.952	233.5	1251	90.6903
	1252	1252	232.134	233.667	1252	90.6543
	1253	1253	232.301	233.833	1253	90.6183
	1254	1254	232.478	234	1254	90.5823
	1255	1255	232.637	234.167	1255	90.5452
	1256	1256	232.814	234.333	1256	90.5084
	1257	1257	232.979	234.5	1257	90.4717
	1258	1258	233.149	234.667	1258	90.435
	1259	1259	233.322	234.833	1259	90.398
	1260	1260	233.489	235	1260	90.3609
	1261	1261	233.662	235.167	1261	90.3237
	1262	1262	233.835	235.333	1262	90.2864
	1263	1263	234.008	235.5	1263	90.2494
	1264	1264	234.186	235.667	1264	90.2125
	1265	1265	234.356	235.833	1265	90.1755
	1266	1266	234.527	236	1266	90.1383
	1267	1267	234.698	236.167	1267	90.1006
	1268	1268	234.869	236.333	1268	90.063
	1269	1269	235.033	236.5	1269	90.0255
	1270	1270	235.206	236.667	1270	89.9879
	1271	1271	235.384	236.833	1271	89.9499
	1272	1272	235.549	237	1272	89.9124
	1273	1273	235.721	237.167	1273	89.875
	1274	1274	235.894	237.333	1274	89.8376
	1275	1275	236.061	237.5	1275	89.8001
	1276	1276	236.239	237.667	1276	89.7625
	1277	1277	236.405	237.833	1277	89.7242
	1278	1278	236.574	238	1278	89.6858
	1279	1279	236.751	238.167	1279	89.6473
	1280	1280	236.915	238.333	1280	89.6077
	1281	1281	237.082	238.5	1281	89.5683
	1282	1282	237.261	238.667	1282	89.5288
	1283	1283	237.435	238.833	1283	89.4892
	1284	1284	237.603	239	1284	89.4495
	1285	1285	237.784	239.167	1285	89.41
	1286	1286	237.951	239.333	1286	89.3703
	1287	1287	238.117	239.5	1287	89.3304
	1288	1288	238.286	239.667	1288	89.29
	1289	1289	238.458	239.833	1289	89.2497
	1290	1290	238.63	240	1290	89.2093
	1291	1291	238.802	240.167	1291	89.169
	1292	1292	238.977	240.333	1292	89.1282
	1293	1293	239.145	240.5	1293	89.0877
	1294	1294	239.308	240.667	1294	89.0471
	1295	1295	239.488	240.833	1295	89.0062
	1296	1296	239.657	241	1296	88.9652
	1297	1297	239.828	241.167	1297	88.9241
	1298	1298	240.003	241.333	1298	88.883
	1299	1299	240.172	241.5	1299	88.842
	1300	1300	240.337	241.667	1300	88.8007
	1301	1301	240.511	241.833	1301	88.7599
	1302	1302	240.678	242	1302	88.7196
	1303	1303	240.853	242.167	1303	88.6796
	1304	1304	241.016	242.333	1304	88.6399
	1305	1305	241.193	242.5	1305	88.5991
	1306	1306	241.365	242.667	1306	88.5575
	1307	1307	241.533	242.833	1307	88.5154
	1308	1308	241.711	243	1308	88.4717
	1309	1309	241.875	243.167	1309	88.4283
	1310	1310	242.048	243.333	1310	88.3847
	1311	1311	242.219	243.5	1311	88.3408
	1312	1312	242.386	243.667	1312	88.2961
	1313	1313	242.56	243.833	1313	88.2521
	1314	1314	242.731	244	1314	88.2082
	1315	1315	242.903	244.167	1315	88.1644
	1316	1316	243.07	244.333	1316	88.1212
	1317	1317	243.248	244.5	1317	88.0775
	1318	1318	243.414	244.667	1318	88.0333
	1319	1319	243.587	244.833	1319	87.989
	1320	1320	243.761	245	1320	87.9444
	1321	1321	243.926	245.167	1321	87.8998
	1322	1322	244.09	245.333	1322	87.8553
	1323	1323	244.259	245.5	1323	87.8108
	1324	1324	244.446	245.667	1324	87.7663
	1325	1325	244.611	245.833	1325	87.722
	1326	1326	244.782	246	1326	87.6772
	1327	1327	244.942	246.167	1327	87.632
	1328	1328	245.113	246.333	1328	87.5866
	1329	1329	245.29	246.5	1329	87.5411
	1330	1330	245.463	246.667	1330	87.4955
	1331	1331	245.631	246.833	1331	87.4498
	1332	1332	245.803	247	1332	87.4029
	1333	1333	245.973	247.167	1333	87.3562
	1334	1334	246.142	247.333	1334	87.3093
	1335	1335	246.314	247.5	1335	87.2626
	1336	1336	246.487	247.667	1336	87.2156
	1337	1337	246.656	247.833	1337	87.1688
	1338	1338	246.822	248	1338	87.1221
	1339	1339	246.996	248.167	1339	87.0755
	1340	1340	247.171	248.333	1340	87.0292
	1341	1341	247.338	248.5	1341	86.9827
	1342	1342	247.506	248.667	1342	86.9356
	1343	1343	247.676	248.833	1343	86.8881
	1344	1344	247.849	249	1344	86.8405
	1345	1345	248.016	249.167	1345	86.7919
	1346	1346	248.188	249.333	1346	86.7431
	1347	1347	248.357	249.5	1347	86.6941
	1348	1348	248.525	249.667	1348	86.645
	1349	1349	248.699	249.833	1349	86.5952
	1350	1350	248.862	250	1350	86.546
	1351	1351	249.044	250.167	1351	86.4971
	1352	1352	249.221	250.333	1352	86.4482
	1353	1353	249.38	250.5	1353	86.3996
	1354	1354	249.552	250.667	1354	86.3505
	1355	1355	249.726	250.833	1355	86.301
	1356	1356	249.901	251	1356	86.2515
	1357	1357	250.071	251.167	1357	86.2015
	1358	1358	250.244	251.333	1358	86.1518
	1359	1359	250.408	251.5	1359	86.102
	1360	1360	250.583	251.667	1360	86.0522
	1361	1361	250.748	251.833	1361	86.0015
	1362	1362	250.913	252	1362	85.9508
	1363	1363	251.092	252.167	1363	85.9
	1364	1364	251.255	252.333	1364	85.8491
	1365	1365	251.427	252.5	1365	85.7974
	1366	1366	251.605	252.667	1366	85.7462
	1367	1367	251.774	252.833	1367	85.695
	1368	1368	251.95	253	1368	85.6436
	1369	1369	252.116	253.167	1369	85.5916
	1370	1370	252.283	253.333	1370	85.5395
	1371	1371	252.457	253.5	1371	85.4873
	1372	1372	252.623	253.667	1372	85.4352
	1373	1373	252.791	253.833	1373	85.3822
	1374	1374	252.962	254	1374	85.3296
	1375	1375	253.131	254.167	1375	85.2772
	1376	1376	253.298	254.333	1376	85.2247
	1377	1377	253.473	254.5	1377	85.172
	1378	1378	253.647	254.667	1378	85.1189
	1379	1379	253.819	254.833	1379	85.0657
	1380	1380	253.979	255	1380	85.0123
	1381	1381	254.157	255.167	1381	84.9583
	1382	1382	254.326	255.333	1382	84.9047
	1383	1383	254.504	255.5	1383	84.8512
	1384	1384	254.666	255.667	1384	84.7977
	1385	1385	254.837	255.833	1385	84.7438
	1386	1386	255.009	256	1386	84.6894
	1387	1387	255.177	256.167	1387	84.6347
	1388	1388	255.353	256.333	1388	84.5799
	1389	1389	255.522	256.5	1389	84.5241
	1390	1390	255.686	256.667	1390	84.4689
	1391	1391	255.863	256.833	1391	84.4137
	1392	1392	256.028	257	1392	84.3586
	1393	1393	256.206	257.167	1393	84.3029
	1394	1394	256.373	257.333	1394	84.2468
	1395	1395	256.541	257.5	1395	84.1905
	1396	1396	256.71	257.667	1396	84.1342
	1397	1397	256.885	257.833	1397	84.0769
	1398	1398	257.054	258	1398	84.0202
	1399	1399	257.23	258.167	1399	83.9634
	1400	1400	257.398	258.333	1400	83.9066
	1401	1401	257.564	258.5	1401	83.8493
	1402	1402	257.726	258.667	1402	83.7918
	1403	1403	257.911	258.833	1403	83.7341
	1404	1404	258.075	259	1404	83.6764
	1405	1405	258.244	259.167	1405	83.6179
	1406	1406	258.414	259.333	1406	83.5599
	1407	1407	258.58	259.5	1407	83.502
	1408	1408	258.756	259.667	1408	83.444
	1409	1409	258.928	259.833	1409	83.3858
	1410	1410	259.097	260	1410	83.3269
	1411	1411	259.266	260.167	1411	83.2678
	1412	1412	259.438	260.333	1412	83.2084
	1413	1413	259.608	260.5	1413	83.1484
	1414	1414	259.775	260.667	1414	83.0882
	1415	1415	259.95	260.833	1415	83.0283
	1416	1416	260.117	261	1416	82.9684
	1417	1417	260.289	261.167	1417	82.9081
	1418	1418	260.458	261.333	1418	82.8469
	1419	1419	260.635	261.5	1419	82.7859
	1420	1420	260.807	261.667	1420	82.725
	1421	1421	260.978	261.833	1421	82.6637
	1422	1422	261.138	262	1422	82.6023
	1423	1423	261.299	262.167	1423	82.5412
	1424	1424	261.481	262.333	1424	82.48
	1425	1425	261.654	262.5	1425	82.4194
	1426	1426	261.821	262.667	1426	82.3578
	1427	1427	261.99	262.833	1427	82.296
	1428	1428	262.165	263	1428	82.2339
	1429	1429	262.332	263.167	1429	82.1716
	1430	1430	262.508	263.333	1430	82.1089
	1431	1431	262.677	263.5	1431	82.0461
	1432	1432	262.847	263.667	1432	81.9828
	1433	1433	263.01	263.833	1433	81.9187
	1434	1434	263.184	264	1434	81.8541
	1435	1435	263.348	264.167	1435	81.7898
	1436	1436	263.523	264.333	1436	81.7254
	1437	1437	263.695	264.5	1437	81.661
	1438	1438	263.871	264.667	1438	81.5962
	1439	1439	264.038	264.833	1439	81.5317
	1440	1440	264.205	265	1440	81.4668
	1441	1441	264.388	265.167	1441	81.4016
	1442	1442	264.555	265.333	1442	81.3362
	1443	1443	264.721	265.5	1443	81.2706
	1444	1444	264.887	265.667	1444	81.2048
	1445	1445	265.066	265.833	1445	81.139
	1446	1446	265.225	266	1446	81.0724
	1447	1447	265.402	266.167	1447	81.006
	1448	1448	265.568	266.333	1448	80.9393
	1449	1449	265.734	266.5	1449	80.8724
	1450	1450	265.907	266.667	1450	80.8052
	1451	1451	266.075	266.833	1451	80.7382
	1452	1452	266.254	267	1452	80.6711
	1453	1453	266.424	267.167	1453	80.604
	1454	1454	266.59	267.333	1454	80.5365
	1455	1455	266.765	267.5	1455	80.4688
	1456	1456	266.928	267.667	1456	80.4007
	1457	1457	267.107	267.833	1457	80.3324
	1458	1458	267.276	268	1458	80.2635
	1459	1459	267.439	268.167	1459	80.1949
	1460	1460	267.614	268.333	1460	80.1262
	1461	1461	267.783	268.5	1461	80.0575
	1462	1462	267.953	268.667	1462	79.9882
	1463	1463

## Sheet: B100
Title	20.08.2018	12:53:00
________________________________________________________________________________
Title
Evaluation	Categories:
Curve	Name:
	!BD_100%-25..600C	10K	N2	50ML	AL100	B	20.08.2018	12:51:03
Curve	Values:
	Index	t	Ts	Tr	x	value	y	value
	[s]	[°C]	[°C]	[s]	[%]
	0	0	24.6557	25	0	99.9997	24.6557	99.9997
	1	1	24.6843	25.1667	1	99.9995	24.6843	99.9995
	2	2	24.6757	25.3333	2	99.9985	24.6757	99.9985
	3	3	24.7576	25.5	3	99.9958	24.7576	99.9958
	4	4	24.8542	25.6667	4	99.9869	24.8542	99.9869
	5	5	24.904	25.8333	5	99.9712	24.904	99.9712
	6	6	25.0012	26	6	99.9529	25.0012	99.9529
	7	7	25.1058	26.1667	7	99.935	25.1058	99.935
	8	8	25.2129	26.3333	8	99.9258	25.2129	99.9258
	9	9	25.3365	26.5	9	99.9187	25.3365	99.9187
	10	10	25.4708	26.6667	10	99.9122	25.4708	99.9122
	11	11	25.588	26.8333	11	99.9067	25.588	99.9067
	12	12	25.7127	27	12	99.8998	25.7127	99.8998
	13	13	25.8522	27.1667	13	99.8904	25.8522	99.8904
	14	14	25.9761	27.3333	14	99.8894	25.9761	99.8894
	15	15	26.1296	27.5	15	99.8948	26.1296	99.8948
	16	16	26.2608	27.6667	16	99.8927	26.2608	99.8927
	17	17	26.3919	27.8333	17	99.8918	26.3919	99.8918
	18	18	26.51	28	18	99.8919	26.51	99.8919
	19	19	26.6712	28.1667	19	99.8923	26.6712	99.8923
	20	20	26.8023	28.3333	20	99.8925	26.8023	99.8925
	21	21	26.9556	28.5	21	99.8929	26.9556	99.8929
	22	22	27.0877	28.6667	22	99.8935	27.0877	99.8935
	23	23	27.2286	28.8333	23	99.894	27.2286	99.894
	24	24	27.3897	29	24	99.8947	27.3897	99.8947
	25	25	27.5025	29.1667	25	99.8952	27.5025	99.8952
	26	26	27.642	29.3333	26	99.8957	27.642	99.8957
	27	27	27.8181	29.5	27	99.8962	27.8181	99.8962
	28	28	27.9393	29.6667	28	99.8966	27.9393	99.8966
	29	29	28.0676	29.8333	29	99.8971	28.0676	99.8971
	30	30	28.2196	30	30	99.8978	28.2196	99.8978
	31	31	28.3348	30.1667	31	99.8985	28.3348	99.8985
	32	32	28.5081	30.3333	32	99.8993	28.5081	99.8993
	33	33	28.6475	30.5	33	99.9001	28.6475	99.9001
	34	34	28.7892	30.6667	34	99.9009	28.7892	99.9009
	35	35	28.9362	30.8333	35	99.9016	28.9362	99.9016
	36	36	29.0462	31	36	99.902	29.0462	99.902
	37	37	29.1871	31.1667	37	99.9026	29.1871	99.9026
	38	38	29.3176	31.3333	38	99.9028	29.3176	99.9028
	39	39	29.4913	31.5	39	99.9029	29.4913	99.9029
	40	40	29.6162	31.6667	40	99.9031	29.6162	99.9031
	41	41	29.7645	31.8333	41	99.9034	29.7645	99.9034
	42	42	29.888	32	42	99.9035	29.888	99.9035
	43	43	30.0358	32.1667	43	99.9037	30.0358	99.9037
	44	44	30.1975	32.3333	44	99.9042	30.1975	99.9042
	45	45	30.3589	32.5	45	99.9042	30.3589	99.9042
	46	46	30.4771	32.6667	46	99.9041	30.4771	99.9041
	47	47	30.6192	32.8333	47	99.904	30.6192	99.904
	48	48	30.7612	33	48	99.9036	30.7612	99.9036
	49	49	30.8929	33.1667	49	99.903	30.8929	99.903
	50	50	31.0152	33.3333	50	99.9026	31.0152	99.9026
	51	51	31.1694	33.5	51	99.9021	31.1694	99.9021
	52	52	31.2934	33.6667	52	99.9012	31.2934	99.9012
	53	53	31.3952	33.8333	53	99.9004	31.3952	99.9004
	54	54	31.5448	34	54	99.8996	31.5448	99.8996
	55	55	31.6851	34.1667	55	99.8987	31.6851	99.8987
	56	56	31.838	34.3333	56	99.8976	31.838	99.8976
	57	57	31.9709	34.5	57	99.8966	31.9709	99.8966
	58	58	32.1233	34.6667	58	99.8955	32.1233	99.8955
	59	59	32.2437	34.8333	59	99.8944	32.2437	99.8944
	60	60	32.3629	35	60	99.8929	32.3629	99.8929
	61	61	32.4929	35.1667	61	99.8918	32.4929	99.8918
	62	62	32.6945	35.3333	62	99.8904	32.6945	99.8904
	63	63	32.8102	35.5	63	99.8891	32.8102	99.8891
	64	64	32.9242	35.6667	64	99.8878	32.9242	99.8878
	65	65	33.057	35.8333	65	99.8865	33.057	99.8865
	66	66	33.2155	36	66	99.8853	33.2155	99.8853
	67	67	33.3147	36.1667	67	99.884	33.3147	99.884
	68	68	33.4739	36.3333	68	99.8829	33.4739	99.8829
	69	69	33.6068	36.5	69	99.8817	33.6068	99.8817
	70	70	33.7644	36.6667	70	99.8805	33.7644	99.8805
	71	71	33.8714	36.8333	71	99.8794	33.8714	99.8794
	72	72	34.0123	37	72	99.8783	34.0123	99.8783
	73	73	34.177	37.1667	73	99.8773	34.177	99.8773
	74	74	34.2986	37.3333	74	99.8761	34.2986	99.8761
	75	75	34.4288	37.5	75	99.875	34.4288	99.875
	76	76	34.5848	37.6667	76	99.8739	34.5848	99.8739
	77	77	34.7209	37.8333	77	99.8728	34.7209	99.8728
	78	78	34.8231	38	78	99.8718	34.8231	99.8718
	79	79	34.9827	38.1667	79	99.8707	34.9827	99.8707
	80	80	35.1087	38.3333	80	99.8693	35.1087	99.8693
	81	81	35.2558	38.5	81	99.8681	35.2558	99.8681
	82	82	35.4121	38.6667	82	99.8668	35.4121	99.8668
	83	83	35.541	38.8333	83	99.8655	35.541	99.8655
	84	84	35.6649	39	84	99.8642	35.6649	99.8642
	85	85	35.8118	39.1667	85	99.8629	35.8118	99.8629
	86	86	35.9674	39.3333	86	99.8616	35.9674	99.8616
	87	87	36.0818	39.5	87	99.8605	36.0818	99.8605
	88	88	36.2102	39.6667	88	99.8594	36.2102	99.8594
	89	89	36.3694	39.8333	89	99.8583	36.3694	99.8583
	90	90	36.5028	40	90	99.8572	36.5028	99.8572
	91	91	36.6417	40.1667	91	99.8562	36.6417	99.8562
	92	92	36.812	40.3333	92	99.8553	36.812	99.8553
	93	93	36.9315	40.5	93	99.8543	36.9315	99.8543
	94	94	37.0732	40.6667	94	99.8535	37.0732	99.8535
	95	95	37.2119	40.8333	95	99.8526	37.2119	99.8526
	96	96	37.357	41	96	99.8519	37.357	99.8519
	97	97	37.4852	41.1667	97	99.8515	37.4852	99.8515
	98	98	37.608	41.3333	98	99.8508	37.608	99.8508
	99	99	37.771	41.5	99	99.8502	37.771	99.8502
	100	100	37.8908	41.6667	100	99.8495	37.8908	99.8495
	101	101	38.0623	41.8333	101	99.8486	38.0623	99.8486
	102	102	38.2045	42	102	99.8478	38.2045	99.8478
	103	103	38.3226	42.1667	103	99.8471	38.3226	99.8471
	104	104	38.4726	42.3333	104	99.8465	38.4726	99.8465
	105	105	38.6107	42.5	105	99.8459	38.6107	99.8459
	106	106	38.7473	42.6667	106	99.8454	38.7473	99.8454
	107	107	38.8863	42.8333	107	99.8447	38.8863	99.8447
	108	108	39.0194	43	108	99.8441	39.0194	99.8441
	109	109	39.1639	43.1667	109	99.8436	39.1639	99.8436
	110	110	39.3413	43.3333	110	99.8429	39.3413	99.8429
	111	111	39.4741	43.5	111	99.8424	39.4741	99.8424
	112	112	39.5943	43.6667	112	99.8418	39.5943	99.8418
	113	113	39.736	43.8333	113	99.8412	39.736	99.8412
	114	114	39.8837	44	114	99.8407	39.8837	99.8407
	115	115	40.0264	44.1667	115	99.8401	40.0264	99.8401
	116	116	40.154	44.3333	116	99.8396	40.154	99.8396
	117	117	40.3135	44.5	117	99.8394	40.3135	99.8394
	118	118	40.4705	44.6667	118	99.8388	40.4705	99.8388
	119	119	40.5729	44.8333	119	99.8383	40.5729	99.8383
	120	120	40.7366	45	120	99.8379	40.7366	99.8379
	121	121	40.8993	45.1667	121	99.8374	40.8993	99.8374
	122	122	41.0408	45.3333	122	99.8369	41.0408	99.8369
	123	123	41.1992	45.5	123	99.8364	41.1992	99.8364
	124	124	41.3226	45.6667	124	99.836	41.3226	99.836
	125	125	41.4506	45.8333	125	99.8356	41.4506	99.8356
	126	126	41.604	46	126	99.8353	41.604	99.8353
	127	127	41.7482	46.1667	127	99.835	41.7482	99.835
	128	128	41.8909	46.3333	128	99.8348	41.8909	99.8348
	129	129	42.0146	46.5	129	99.8348	42.0146	99.8348
	130	130	42.156	46.6667	130	99.8347	42.156	99.8347
	131	131	42.3325	46.8333	131	99.8345	42.3325	99.8345
	132	132	42.4617	47	132	99.8344	42.4617	99.8344
	133	133	42.6279	47.1667	133	99.8341	42.6279	99.8341
	134	134	42.7678	47.3333	134	99.8337	42.7678	99.8337
	135	135	42.9112	47.5	135	99.8334	42.9112	99.8334
	136	136	43.0475	47.6667	136	99.8331	43.0475	99.8331
	137	137	43.2142	47.8333	137	99.8321	43.2142	99.8321
	138	138	43.3421	48	138	99.8316	43.3421	99.8316
	139	139	43.5111	48.1667	139	99.8311	43.5111	99.8311
	140	140	43.6577	48.3333	140	99.8306	43.6577	99.8306
	141	141	43.7908	48.5	141	99.8302	43.7908	99.8302
	142	142	43.9215	48.6667	142	99.83	43.9215	99.83
	143	143	44.0716	48.8333	143	99.8297	44.0716	99.8297
	144	144	44.2088	49	144	99.8297	44.2088	99.8297
	145	145	44.3652	49.1667	145	99.8299	44.3652	99.8299
	146	146	44.519	49.3333	146	99.83	44.519	99.83
	147	147	44.6988	49.5	147	99.8301	44.6988	99.8301
	148	148	44.8087	49.6667	148	99.8303	44.8087	99.8303
	149	149	44.9657	49.8333	149	99.8305	44.9657	99.8305
	150	150	45.0976	50	150	99.8301	45.0976	99.8301
	151	151	45.2419	50.1667	151	99.83	45.2419	99.83
	152	152	45.4213	50.3333	152	99.8298	45.4213	99.8298
	153	153	45.5594	50.5	153	99.8293	45.5594	99.8293
	154	154	45.6763	50.6667	154	99.829	45.6763	99.829
	155	155	45.8815	50.8333	155	99.8286	45.8815	99.8286
	156	156	45.9588	51	156	99.8281	45.9588	99.8281
	157	157	46.1934	51.1667	157	99.8275	46.1934	99.8275
	158	158	46.335	51.3333	158	99.8271	46.335	99.8271
	159	159	46.4356	51.5	159	99.8268	46.4356	99.8268
	160	160	46.5952	51.6667	160	99.8264	46.5952	99.8264
	161	161	46.7429	51.8333	161	99.8259	46.7429	99.8259
	162	162	46.9159	52	162	99.8257	46.9159	99.8257
	163	163	47.0153	52.1667	163	99.8252	47.0153	99.8252
	164	164	47.1632	52.3333	164	99.8248	47.1632	99.8248
	165	165	47.3391	52.5	165	99.8245	47.3391	99.8245
	166	166	47.498	52.6667	166	99.8244	47.498	99.8244
	167	167	47.6626	52.8333	167	99.8241	47.6626	99.8241
	168	168	47.7955	53	168	99.8238	47.7955	99.8238
	169	169	47.9517	53.1667	169	99.8237	47.9517	99.8237
	170	170	48.0885	53.3333	170	99.8233	48.0885	99.8233
	171	171	48.2461	53.5	171	99.823	48.2461	99.823
	172	172	48.3991	53.6667	172	99.8229	48.3991	99.8229
	173	173	48.534	53.8333	173	99.8226	48.534	99.8226
	174	174	48.6868	54	174	99.8222	48.6868	99.8222
	175	175	48.842	54.1667	175	99.8222	48.842	99.8222
	176	176	49.0056	54.3333	176	99.822	49.0056	99.822
	177	177	49.1403	54.5	177	99.8216	49.1403	99.8216
	178	178	49.299	54.6667	178	99.8218	49.299	99.8218
	179	179	49.4685	54.8333	179	99.8218	49.4685	99.8218
	180	180	49.6085	55	180	99.8215	49.6085	99.8215
	181	181	49.7294	55.1667	181	99.8212	49.7294	99.8212
	182	182	49.9179	55.3333	182	99.8212	49.9179	99.8212
	183	183	50.0707	55.5	183	99.821	50.0707	99.821
	184	184	50.2354	55.6667	184	99.8207	50.2354	99.8207
	185	185	50.3772	55.8333	185	99.8205	50.3772	99.8205
	186	186	50.5314	56	186	99.8207	50.5314	99.8207
	187	187	50.6836	56.1667	187	99.8204	50.6836	99.8204
	188	188	50.8308	56.3333	188	99.8202	50.8308	99.8202
	189	189	50.9906	56.5	189	99.8201	50.9906	99.8201
	190	190	51.1457	56.6667	190	99.8199	51.1457	99.8199
	191	191	51.2908	56.8333	191	99.8196	51.2908	99.8196
	192	192	51.4318	57	192	99.8195	51.4318	99.8195
	193	193	51.5797	57.1667	193	99.8193	51.5797	99.8193
	194	194	51.7645	57.3333	194	99.8188	51.7645	99.8188
	195	195	51.8854	57.5	195	99.8184	51.8854	99.8184
	196	196	52.0495	57.6667	196	99.818	52.0495	99.818
	197	197	52.2147	57.8333	197	99.8177	52.2147	99.8177
	198	198	52.3538	58	198	99.8172	52.3538	99.8172
	199	199	52.5168	58.1667	199	99.8172	52.5168	99.8172
	200	200	52.6647	58.3333	200	99.8172	52.6647	99.8172
	201	201	52.8318	58.5	201	99.8171	52.8318	99.8171
	202	202	52.9685	58.6667	202	99.8174	52.9685	99.8174
	203	203	53.1363	58.8333	203	99.8174	53.1363	99.8174
	204	204	53.2804	59	204	99.8174	53.2804	99.8174
	205	205	53.4518	59.1667	205	99.8174	53.4518	99.8174
	206	206	53.6324	59.3333	206	99.8173	53.6324	99.8173
	207	207	53.7677	59.5	207	99.8174	53.7677	99.8174
	208	208	53.9015	59.6667	208	99.8174	53.9015	99.8174
	209	209	54.0533	59.8333	209	99.8173	54.0533	99.8173
	210	210	54.224	60	210	99.8174	54.224	99.8174
	211	211	54.3702	60.1667	211	99.8177	54.3702	99.8177
	212	212	54.5266	60.3333	212	99.8177	54.5266	99.8177
	213	213	54.6926	60.5	213	99.8176	54.6926	99.8176
	214	214	54.853	60.6667	214	99.8172	54.853	99.8172
	215	215	55.0096	60.8333	215	99.817	55.0096	99.817
	216	216	55.158	61	216	99.8168	55.158	99.8168
	217	217	55.3166	61.1667	217	99.8165	55.3166	99.8165
	218	218	55.4958	61.3333	218	99.8158	55.4958	99.8158
	219	219	55.6293	61.5	219	99.8156	55.6293	99.8156
	220	220	55.7749	61.6667	220	99.8155	55.7749	99.8155
	221	221	55.9287	61.8333	221	99.8154	55.9287	99.8154
	222	222	56.1107	62	222	99.815	56.1107	99.815
	223	223	56.2555	62.1667	223	99.8148	56.2555	99.8148
	224	224	56.4061	62.3333	224	99.8147	56.4061	99.8147
	225	225	56.5428	62.5	225	99.8144	56.5428	99.8144
	226	226	56.7223	62.6667	226	99.8139	56.7223	99.8139
	227	227	56.8795	62.8333	227	99.8139	56.8795	99.8139
	228	228	57.0305	63	228	99.8138	57.0305	99.8138
	229	229	57.196	63.1667	229	99.8134	57.196	99.8134
	230	230	57.3408	63.3333	230	99.8127	57.3408	99.8127
	231	231	57.5343	63.5	231	99.8125	57.5343	99.8125
	232	232	57.658	63.6667	232	99.8124	57.658	99.8124
	233	233	57.8077	63.8333	233	99.8121	57.8077	99.8121
	234	234	57.9795	64	234	99.8118	57.9795	99.8118
	235	235	58.1236	64.1667	235	99.8118	58.1236	99.8118
	236	236	58.2733	64.3333	236	99.8117	58.2733	99.8117
	237	237	58.4534	64.5	237	99.8113	58.4534	99.8113
	238	238	58.6053	64.6667	238	99.8108	58.6053	99.8108
	239	239	58.7647	64.8333	239	99.8109	58.7647	99.8109
	240	240	58.9441	65	240	99.8108	58.9441	99.8108
	241	241	59.0911	65.1667	241	99.8103	59.0911	99.8103
	242	242	59.2242	65.3333	242	99.8101	59.2242	99.8101
	243	243	59.4167	65.5	243	99.8102	59.4167	99.8102
	244	244	59.5751	65.6667	244	99.8101	59.5751	99.8101
	245	245	59.7452	65.8333	245	99.8097	59.7452	99.8097
	246	246	59.8907	66	246	99.8095	59.8907	99.8095
	247	247	60.06	66.1667	247	99.8096	60.06	99.8096
	248	248	60.1881	66.3333	248	99.8095	60.1881	99.8095
	249	249	60.3537	66.5	249	99.8092	60.3537	99.8092
	250	250	60.4815	66.6667	250	99.809	60.4815	99.809
	251	251	60.6695	66.8333	251	99.8087	60.6695	99.8087
	252	252	60.8576	67	252	99.8084	60.8576	99.8084
	253	253	61.0046	67.1667	253	99.8081	61.0046	99.8081
	254	254	61.1527	67.3333	254	99.8075	61.1527	99.8075
	255	255	61.2799	67.5	255	99.8066	61.2799	99.8066
	256	256	61.4434	67.6667	256	99.806	61.4434	99.806
	257	257	61.6048	67.8333	257	99.8055	61.6048	99.8055
	258	258	61.7987	68	258	99.8047	61.7987	99.8047
	259	259	61.9459	68.1667	259	99.8034	61.9459	99.8034
	260	260	62.1044	68.3333	260	99.8027	62.1044	99.8027
	261	261	62.2649	68.5	261	99.8023	62.2649	99.8023
	262	262	62.4135	68.6667	262	99.8018	62.4135	99.8018
	263	263	62.5855	68.8333	263	99.8014	62.5855	99.8014
	264	264	62.7352	69	264	99.8012	62.7352	99.8012
	265	265	62.8922	69.1667	265	99.8012	62.8922	99.8012
	266	266	63.0617	69.3333	266	99.8011	63.0617	99.8011
	267	267	63.2347	69.5	267	99.8009	63.2347	99.8009
	268	268	63.3962	69.6667	268	99.8006	63.3962	99.8006
	269	269	63.5343	69.8333	269	99.8003	63.5343	99.8003
	270	270	63.7109	70	270	99.7999	63.7109	99.7999
	271	271	63.8682	70.1667	271	99.7993	63.8682	99.7993
	272	272	64.0192	70.3333	272	99.7987	64.0192	99.7987
	273	273	64.1869	70.5	273	99.7981	64.1869	99.7981
	274	274	64.3557	70.6667	274	99.7974	64.3557	99.7974
	275	275	64.4905	70.8333	275	99.7972	64.4905	99.7972
	276	276	64.6665	71	276	99.7969	64.6665	99.7969
	277	277	64.8201	71.1667	277	99.7963	64.8201	99.7963
	278	278	64.9822	71.3333	278	99.7957	64.9822	99.7957
	279	279	65.1368	71.5	279	99.7958	65.1368	99.7958
	280	280	65.2999	71.6667	280	99.7954	65.2999	99.7954
	281	281	65.4658	71.8333	281	99.7947	65.4658	99.7947
	282	282	65.6325	72	282	99.7941	65.6325	99.7941
	283	283	65.7918	72.1667	283	99.7937	65.7918	99.7937
	284	284	65.949	72.3333	284	99.7933	65.949	99.7933
	285	285	66.1047	72.5	285	99.7927	66.1047	99.7927
	286	286	66.2741	72.6667	286	99.7921	66.2741	99.7921
	287	287	66.4312	72.8333	287	99.7921	66.4312	99.7921
	288	288	66.5884	73	288	99.7919	66.5884	99.7919
	289	289	66.7693	73.1667	289	99.7915	66.7693	99.7915
	290	290	66.9374	73.3333	290	99.7911	66.9374	99.7911
	291	291	67.0916	73.5	291	99.7908	67.0916	99.7908
	292	292	67.2142	73.6667	292	99.7904	67.2142	99.7904
	293	293	67.3713	73.8333	293	99.79	67.3713	99.79
	294	294	67.5605	74	294	99.7897	67.5605	99.7897
	295	295	67.7073	74.1667	295	99.7896	67.7073	99.7896
	296	296	67.8711	74.3333	296	99.7895	67.8711	99.7895
	297	297	68.0592	74.5	297	99.7894	68.0592	99.7894
	298	298	68.2281	74.6667	298	99.7893	68.2281	99.7893
	299	299	68.3898	74.8333	299	99.7895	68.3898	99.7895
	300	300	68.5404	75	300	99.7893	68.5404	99.7893
	301	301	68.7208	75.1667	301	99.7891	68.7208	99.7891
	302	302	68.8573	75.3333	302	99.7889	68.8573	99.7889
	303	303	69.0512	75.5	303	99.7884	69.0512	99.7884
	304	304	69.1944	75.6667	304	99.7881	69.1944	99.7881
	305	305	69.3621	75.8333	305	99.788	69.3621	99.788
	306	306	69.524	76	306	99.7881	69.524	99.7881
	307	307	69.6788	76.1667	307	99.7882	69.6788	99.7882
	308	308	69.8385	76.3333	308	99.7887	69.8385	99.7887
	309	309	70.0202	76.5	309	99.7891	70.0202	99.7891
	310	310	70.1765	76.6667	310	99.7897	70.1765	99.7897
	311	311	70.3383	76.8333	311	99.7905	70.3383	99.7905
	312	312	70.5066	77	312	99.7913	70.5066	99.7913
	313	313	70.6671	77.1667	313	99.7921	70.6671	99.7921
	314	314	70.8441	77.3333	314	99.793	70.8441	99.793
	315	315	71.0136	77.5	315	99.7942	71.0136	99.7942
	316	316	71.1735	77.6667	316	99.7958	71.1735	99.7958
	317	317	71.3596	77.8333	317	99.7971	71.3596	99.7971
	318	318	71.5315	78	318	99.7982	71.5315	99.7982
	319	319	71.6846	78.1667	319	99.7996	71.6846	99.7996
	320	320	71.8651	78.3333	320	99.8005	71.8651	99.8005
	321	321	72.0231	78.5	321	99.801	72.0231	99.801
	322	322	72.1902	78.6667	322	99.8016	72.1902	99.8016
	323	323	72.3535	78.8333	323	99.8017	72.3535	99.8017
	324	324	72.5053	79	324	99.8018	72.5053	99.8018
	325	325	72.6904	79.1667	325	99.8022	72.6904	99.8022
	326	326	72.8541	79.3333	326	99.8028	72.8541	99.8028
	327	327	73.0032	79.5	327	99.8034	73.0032	99.8034
	328	328	73.1826	79.6667	328	99.8047	73.1826	99.8047
	329	329	73.3703	79.8333	329	99.8059	73.3703	99.8059
	330	330	73.5437	80	330	99.8068	73.5437	99.8068
	331	331	73.7236	80.1667	331	99.8077	73.7236	99.8077
	332	332	73.8791	80.3333	332	99.8091	73.8791	99.8091
	333	333	74.0587	80.5	333	99.8098	74.0587	99.8098
	334	334	74.2118	80.6667	334	99.8104	74.2118	99.8104
	335	335	74.3954	80.8333	335	99.8111	74.3954	99.8111
	336	336	74.5693	81	336	99.8116	74.5693	99.8116
	337	337	74.7337	81.1667	337	99.812	74.7337	99.812
	338	338	74.8984	81.3333	338	99.8124	74.8984	99.8124
	339	339	75.0681	81.5	339	99.8129	75.0681	99.8129
	340	340	75.2656	81.6667	340	99.8136	75.2656	99.8136
	341	341	75.4382	81.8333	341	99.8138	75.4382	99.8138
	342	342	75.5989	82	342	99.8139	75.5989	99.8139
	343	343	75.7726	82.1667	343	99.814	75.7726	99.814
	344	344	75.9439	82.3333	344	99.8133	75.9439	99.8133
	345	345	76.1197	82.5	345	99.8128	76.1197	99.8128
	346	346	76.2751	82.6667	346	99.8127	76.2751	99.8127
	347	347	76.4548	82.8333	347	99.8129	76.4548	99.8129
	348	348	76.6364	83	348	99.8128	76.6364	99.8128
	349	349	76.8192	83.1667	349	99.8129	76.8192	99.8129
	350	350	76.9751	83.3333	350	99.8132	76.9751	99.8132
	351	351	77.1654	83.5	351	99.8135	77.1654	99.8135
	352	352	77.3495	83.6667	352	99.8144	77.3495	99.8144
	353	353	77.5142	83.8333	353	99.8145	77.5142	99.8145
	354	354	77.6684	84	354	99.8146	77.6684	99.8146
	355	355	77.8428	84.1667	355	99.8148	77.8428	99.8148
	356	356	78.0148	84.3333	356	99.8147	78.0148	99.8147
	357	357	78.2052	84.5	357	99.8146	78.2052	99.8146
	358	358	78.3629	84.6667	358	99.8143	78.3629	99.8143
	359	359	78.5382	84.8333	359	99.814	78.5382	99.814
	360	360	78.7182	85	360	99.8143	78.7182	99.8143
	361	361	78.8996	85.1667	361	99.8144	78.8996	99.8144
	362	362	79.0767	85.3333	362	99.8143	79.0767	99.8143
	363	363	79.2411	85.5	363	99.8141	79.2411	99.8141
	364	364	79.4255	85.6667	364	99.8144	79.4255	99.8144
	365	365	79.57	85.8333	365	99.8146	79.57	99.8146
	366	366	79.7676	86	366	99.8146	79.7676	99.8146
	367	367	79.9463	86.1667	367	99.8144	79.9463	99.8144
	368	368	80.1178	86.3333	368	99.8145	80.1178	99.8145
	369	369	80.2922	86.5	369	99.8145	80.2922	99.8145
	370	370	80.4581	86.6667	370	99.8144	80.4581	99.8144
	371	371	80.6427	86.8333	371	99.8139	80.6427	99.8139
	372	372	80.8285	87	372	99.8132	80.8285	99.8132
	373	373	80.9949	87.1667	373	99.8125	80.9949	99.8125
	374	374	81.1615	87.3333	374	99.8123	81.1615	99.8123
	375	375	81.3441	87.5	375	99.8121	81.3441	99.8121
	376	376	81.5272	87.6667	376	99.8115	81.5272	99.8115
	377	377	81.7201	87.8333	377	99.8111	81.7201	99.8111
	378	378	81.8743	88	378	99.8109	81.8743	99.8109
	379	379	82.0564	88.1667	379	99.811	82.0564	99.811
	380	380	82.2094	88.3333	380	99.8106	82.2094	99.8106
	381	381	82.3993	88.5	381	99.8101	82.3993	99.8101
	382	382	82.5746	88.6667	382	99.8098	82.5746	99.8098
	383	383	82.7517	88.8333	383	99.8099	82.7517	99.8099
	384	384	82.907	89	384	99.8097	82.907	99.8097
	385	385	83.0908	89.1667	385	99.8091	83.0908	99.8091
	386	386	83.2653	89.3333	386	99.8087	83.2653	99.8087
	387	387	83.4388	89.5	387	99.8084	83.4388	99.8084
	388	388	83.6161	89.6667	388	99.808	83.6161	99.808
	389	389	83.7686	89.8333	389	99.8078	83.7686	99.8078
	390	390	83.9458	90	390	99.8076	83.9458	99.8076
	391	391	84.1257	90.1667	391	99.8074	84.1257	99.8074
	392	392	84.3289	90.3333	392	99.8072	84.3289	99.8072
	393	393	84.4804	90.5	393	99.8069	84.4804	99.8069
	394	394	84.6705	90.6667	394	99.8065	84.6705	99.8065
	395	395	84.8306	90.8333	395	99.8064	84.8306	99.8064
	396	396	84.9937	91	396	99.8064	84.9937	99.8064
	397	397	85.1817	91.1667	397	99.8058	85.1817	99.8058
	398	398	85.3476	91.3333	398	99.8051	85.3476	99.8051
	399	399	85.5221	91.5	399	99.8047	85.5221	99.8047
	400	400	85.709	91.6667	400	99.8045	85.709	99.8045
	401	401	85.8883	91.8333	401	99.8045	85.8883	99.8045
	402	402	86.0684	92	402	99.8041	86.0684	99.8041
	403	403	86.2415	92.1667	403	99.8034	86.2415	99.8034
	404	404	86.3732	92.3333	404	99.8027	86.3732	99.8027
	405	405	86.5729	92.5	405	99.8025	86.5729	99.8025
	406	406	86.7491	92.6667	406	99.8023	86.7491	99.8023
	407	407	86.9153	92.8333	407	99.8019	86.9153	99.8019
	408	408	87.1191	93	408	99.8014	87.1191	99.8014
	409	409	87.2857	93.1667	409	99.8012	87.2857	99.8012
	410	410	87.4743	93.3333	410	99.801	87.4743	99.801
	411	411	87.6408	93.5	411	99.8007	87.6408	99.8007
	412	412	87.8021	93.6667	412	99.8004	87.8021	99.8004
	413	413	87.9943	93.8333	413	99.7999	87.9943	99.7999
	414	414	88.1544	94	414	99.7996	88.1544	99.7996
	415	415	88.334	94.1667	415	99.7992	88.334	99.7992
	416	416	88.5047	94.3333	416	99.7988	88.5047	99.7988
	417	417	88.6767	94.5	417	99.7984	88.6767	99.7984
	418	418	88.8352	94.6667	418	99.7981	88.8352	99.7981
	419	419	89.0133	94.8333	419	99.7975	89.0133	99.7975
	420	420	89.1946	95	420	99.7966	89.1946	99.7966
	421	421	89.3851	95.1667	421	99.7959	89.3851	99.7959
	422	422	89.5614	95.3333	422	99.7956	89.5614	99.7956
	423	423	89.7289	95.5	423	99.795	89.7289	99.795
	424	424	89.8958	95.6667	424	99.7942	89.8958	99.7942
	425	425	90.0574	95.8333	425	99.7935	90.0574	99.7935
	426	426	90.2385	96	426	99.7927	90.2385	99.7927
	427	427	90.416	96.1667	427	99.7919	90.416	99.7919
	428	428	90.5951	96.3333	428	99.7913	90.5951	99.7913
	429	429	90.7653	96.5	429	99.7905	90.7653	99.7905
	430	430	90.9382	96.6667	430	99.79	90.9382	99.79
	431	431	91.1256	96.8333	431	99.7896	91.1256	99.7896
	432	432	91.2947	97	432	99.7892	91.2947	99.7892
	433	433	91.4694	97.1667	433	99.7892	91.4694	99.7892
	434	434	91.6441	97.3333	434	99.7891	91.6441	99.7891
	435	435	91.8168	97.5	435	99.7889	91.8168	99.7889
	436	436	91.9948	97.6667	436	99.7888	91.9948	99.7888
	437	437	92.1535	97.8333	437	99.7882	92.1535	99.7882
	438	438	92.343	98	438	99.7876	92.343	99.7876
	439	439	92.5016	98.1667	439	99.7874	92.5016	99.7874
	440	440	92.6901	98.3333	440	99.7873	92.6901	99.7873
	441	441	92.859	98.5	441	99.7869	92.859	99.7869
	442	442	93.0137	98.6667	442	99.7864	93.0137	99.7864
	443	443	93.1874	98.8333	443	99.7859	93.1874	99.7859
	444	444	93.3765	99	444	99.7858	93.3765	99.7858
	445	445	93.5467	99.1667	445	99.7859	93.5467	99.7859
	446	446	93.7449	99.3333	446	99.7856	93.7449	99.7856
	447	447	93.9081	99.5	447	99.785	93.9081	99.785
	448	448	94.0633	99.6667	448	99.7843	94.0633	99.7843
	449	449	94.24	99.8333	449	99.7838	94.24	99.7838
	450	450	94.4212	100	450	99.7835	94.4212	99.7835
	451	451	94.5923	100.167	451	99.7832	94.5923	99.7832
	452	452	94.7597	100.333	452	99.7829	94.7597	99.7829
	453	453	94.9328	100.5	453	99.7826	94.9328	99.7826
	454	454	95.1046	100.667	454	99.7824	95.1046	99.7824
	455	455	95.2854	100.833	455	99.7821	95.2854	99.7821
	456	456	95.4501	101	456	99.7818	95.4501	99.7818
	457	457	95.622	101.167	457	99.7812	95.622	99.7812
	458	458	95.8016	101.333	458	99.7804	95.8016	99.7804
	459	459	95.9786	101.5	459	99.7799	95.9786	99.7799
	460	460	96.1606	101.667	460	99.7793	96.1606	99.7793
	461	461	96.3353	101.833	461	99.7781	96.3353	99.7781
	462	462	96.4997	102	462	99.7777	96.4997	99.7777
	463	463	96.663	102.167	463	99.7776	96.663	99.7776
	464	464	96.8461	102.333	464	99.7775	96.8461	99.7775
	465	465	97.0203	102.5	465	99.7771	97.0203	99.7771
	466	466	97.2029	102.667	466	99.7767	97.2029	99.7767
	467	467	97.381	102.833	467	99.7762	97.381	99.7762
	468	468	97.5361	103	468	99.7761	97.5361	99.7761
	469	469	97.7144	103.167	469	99.7761	97.7144	99.7761
	470	470	97.8725	103.333	470	99.7754	97.8725	99.7754
	471	471	98.0675	103.5	471	99.7748	98.0675	99.7748
	472	472	98.2383	103.667	472	99.7741	98.2383	99.7741
	473	473	98.4081	103.833	473	99.7737	98.4081	99.7737
	474	474	98.5853	104	474	99.7734	98.5853	99.7734
	475	475	98.754	104.167	475	99.7728	98.754	99.7728
	476	476	98.9247	104.333	476	99.7723	98.9247	99.7723
	477	477	99.0987	104.5	477	99.7719	99.0987	99.7719
	478	478	99.2678	104.667	478	99.7716	99.2678	99.7716
	479	479	99.449	104.833	479	99.7713	99.449	99.7713
	480	480	99.6121	105	480	99.771	99.6121	99.771
	481	481	99.7851	105.167	481	99.771	99.7851	99.771
	482	482	99.9721	105.333	482	99.7708	99.9721	99.7708
	483	483	100.128	105.5	483	99.7706	100.128	99.7706
	484	484	100.293	105.667	484	99.7703	100.293	99.7703
	485	485	100.488	105.833	485	99.7698	100.488	99.7698
	486	486	100.662	106	486	99.7695	100.662	99.7695
	487	487	100.832	106.167	487	99.7695	100.832	99.7695
	488	488	101.013	106.333	488	99.7693	101.013	99.7693
	489	489	101.178	106.5	489	99.769	101.178	99.769
	490	490	101.355	106.667	490	99.7685	101.355	99.7685
	491	491	101.525	106.833	491	99.7681	101.525	99.7681
	492	492	101.718	107	492	99.7677	101.718	99.7677
	493	493	101.878	107.167	493	99.7671	101.878	99.7671
	494	494	102.04	107.333	494	99.7658	102.04	99.7658
	495	495	102.224	107.5	495	99.7649	102.224	99.7649
	496	496	102.389	107.667	496	99.7642	102.389	99.7642
	497	497	102.548	107.833	497	99.7636	102.548	99.7636
	498	498	102.732	108	498	99.7634	102.732	99.7634
	499	499	102.917	108.167	499	99.763	102.917	99.763
	500	500	103.093	108.333	500	99.7628	103.093	99.7628
	501	501	103.262	108.5	501	99.7626	103.262	99.7626
	502	502	103.424	108.667	502	99.7624	103.424	99.7624
	503	503	103.61	108.833	503	99.7621	103.61	99.7621
	504	504	103.781	109	504	99.7618	103.781	99.7618
	505	505	103.946	109.167	505	99.7616	103.946	99.7616
	506	506	104.111	109.333	506	99.7611	104.111	99.7611
	507	507	104.308	109.5	507	99.7605	104.308	99.7605
	508	508	104.472	109.667	508	99.7598	104.472	99.7598
	509	509	104.649	109.833	509	99.7591	104.649	99.7591
	510	510	104.812	110	510	99.759	104.812	99.759
	511	511	104.987	110.167	511	99.7589	104.987	99.7589
	512	512	105.156	110.333	512	99.7586	105.156	99.7586
	513	513	105.331	110.5	513	99.758	105.331	99.758
	514	514	105.504	110.667	514	99.7577	105.504	99.7577
	515	515	105.678	110.833	515	99.7572	105.678	99.7572
	516	516	105.841	111	516	99.7568	105.841	99.7568
	517	517	106.018	111.167	517	99.7565	106.018	99.7565
	518	518	106.201	111.333	518	99.7556	106.201	99.7556
	519	519	106.367	111.5	519	99.7549	106.367	99.7549
	520	520	106.537	111.667	520	99.7543	106.537	99.7543
	521	521	106.71	111.833	521	99.7538	106.71	99.7538
	522	522	106.895	112	522	99.7538	106.895	99.7538
	523	523	107.071	112.167	523	99.7536	107.071	99.7536
	524	524	107.244	112.333	524	99.7534	107.244	99.7534
	525	525	107.42	112.5	525	99.7531	107.42	99.7531
	526	526	107.585	112.667	526	99.7533	107.585	99.7533
	527	527	107.761	112.833	527	99.7531	107.761	99.7531
	528	528	107.928	113	528	99.753	107.928	99.753
	529	529	108.095	113.167	529	99.7529	108.095	99.7529
	530	530	108.283	113.333	530	99.7528	108.283	99.7528
	531	531	108.448	113.5	531	99.7526	108.448	99.7526
	532	532	108.618	113.667	532	99.7521	108.618	99.7521
	533	533	108.786	113.833	533	99.7512	108.786	99.7512
	534	534	108.974	114	534	99.7506	108.974	99.7506
	535	535	109.128	114.167	535	99.7502	109.128	99.7502
	536	536	109.305	114.333	536	99.7497	109.305	99.7497
	537	537	109.473	114.5	537	99.7489	109.473	99.7489
	538	538	109.671	114.667	538	99.748	109.671	99.748
	539	539	109.824	114.833	539	99.7477	109.824	99.7477
	540	540	110.013	115	540	99.7475	110.013	99.7475
	541	541	110.176	115.167	541	99.7473	110.176	99.7473
	542	542	110.357	115.333	542	99.7471	110.357	99.7471
	543	543	110.528	115.5	543	99.7465	110.528	99.7465
	544	544	110.689	115.667	544	99.7461	110.689	99.7461
	545	545	110.871	115.833	545	99.7459	110.871	99.7459
	546	546	111.04	116	546	99.7457	111.04	99.7457
	547	547	111.21	116.167	547	99.7453	111.21	99.7453
	548	548	111.396	116.333	548	99.745	111.396	99.745
	549	549	111.568	116.5	549	99.7446	111.568	99.7446
	550	550	111.736	116.667	550	99.7444	111.736	99.7444
	551	551	111.905	116.833	551	99.7443	111.905	99.7443
	552	552	112.073	117	552	99.7444	112.073	99.7444
	553	553	112.25	117.167	553	99.7448	112.25	99.7448
	554	554	112.425	117.333	554	99.7455	112.425	99.7455
	555	555	112.587	117.5	555	99.7452	112.587	99.7452
	556	556	112.753	117.667	556	99.745	112.753	99.745
	557	557	112.935	117.833	557	99.7447	112.935	99.7447
	558	558	113.108	118	558	99.7444	113.108	99.7444
	559	559	113.281	118.167	559	99.7441	113.281	99.7441
	560	560	113.461	118.333	560	99.7442	113.461	99.7442
	561	561	113.633	118.5	561	99.7442	113.633	99.7442
	562	562	113.805	118.667	562	99.7442	113.805	99.7442
	563	563	113.971	118.833	563	99.7444	113.971	99.7444
	564	564	114.143	119	564	99.7439	114.143	99.7439
	565	565	114.32	119.167	565	99.743	114.32	99.743
	566	566	114.497	119.333	566	99.7422	114.497	99.7422
	567	567	114.674	119.5	567	99.7406	114.674	99.7406
	568	568	114.845	119.667	568	99.7393	114.845	99.7393
	569	569	115.007	119.833	569	99.7381	115.007	99.7381
	570	570	115.168	120	570	99.7371	115.168	99.7371
	571	571	115.345	120.167	571	99.7366	115.345	99.7366
	572	572	115.519	120.333	572	99.7362	115.519	99.7362
	573	573	115.695	120.5	573	99.7357	115.695	99.7357
	574	574	115.872	120.667	574	99.7353	115.872	99.7353
	575	575	116.031	120.833	575	99.7354	116.031	99.7354
	576	576	116.205	121	576	99.735	116.205	99.735
	577	577	116.388	121.167	577	99.7343	116.388	99.7343
	578	578	116.558	121.333	578	99.7336	116.558	99.7336
	579	579	116.74	121.5	579	99.7331	116.74	99.7331
	580	580	116.901	121.667	580	99.7329	116.901	99.7329
	581	581	117.081	121.833	581	99.7326	117.081	99.7326
	582	582	117.255	122	582	99.7321	117.255	99.7321
	583	583	117.436	122.167	583	99.7316	117.436	99.7316
	584	584	117.6	122.333	584	99.7307	117.6	99.7307
	585	585	117.775	122.5	585	99.7298	117.775	99.7298
	586	586	117.943	122.667	586	99.7288	117.943	99.7288
	587	587	118.11	122.833	587	99.7271	118.11	99.7271
	588	588	118.283	123	588	99.7262	118.283	99.7262
	589	589	118.452	123.167	589	99.7255	118.452	99.7255
	590	590	118.627	123.333	590	99.7247	118.627	99.7247
	591	591	118.811	123.5	591	99.7241	118.811	99.7241
	592	592	118.977	123.667	592	99.7233	118.977	99.7233
	593	593	119.141	123.833	593	99.7228	119.141	99.7228
	594	594	119.332	124	594	99.7226	119.332	99.7226
	595	595	119.496	124.167	595	99.7222	119.496	99.7222
	596	596	119.674	124.333	596	99.722	119.674	99.722
	597	597	119.824	124.5	597	99.7217	119.824	99.7217
	598	598	120.003	124.667	598	99.7211	120.003	99.7211
	599	599	120.184	124.833	599	99.7213	120.184	99.7213
	600	600	120.356	125	600	99.7214	120.356	99.7214
	601	601	120.516	125.167	601	99.7212	120.516	99.7212
	602	602	120.703	125.333	602	99.7208	120.703	99.7208
	603	603	120.868	125.5	603	99.7199	120.868	99.7199
	604	604	121.051	125.667	604	99.7196	121.051	99.7196
	605	605	121.222	125.833	605	99.7191	121.222	99.7191
	606	606	121.384	126	606	99.7187	121.384	99.7187
	607	607	121.557	126.167	607	99.7183	121.557	99.7183
	608	608	121.729	126.333	608	99.7175	121.729	99.7175
	609	609	121.899	126.5	609	99.7169	121.899	99.7169
	610	610	122.08	126.667	610	99.7163	122.08	99.7163
	611	611	122.249	126.833	611	99.7151	122.249	99.7151
	612	612	122.419	127	612	99.7142	122.419	99.7142
	613	613	122.593	127.167	613	99.7138	122.593	99.7138
	614	614	122.768	127.333	614	99.7138	122.768	99.7138
	615	615	122.933	127.5	615	99.7146	122.933	99.7146
	616	616	123.101	127.667	616	99.7157	123.101	99.7157
	617	617	123.295	127.833	617	99.7167	123.295	99.7167
	618	618	123.456	128	618	99.7175	123.456	99.7175
	619	619	123.621	128.167	619	99.719	123.621	99.719
	620	620	123.796	128.333	620	99.7192	123.796	99.7192
	621	621	123.98	128.5	621	99.7195	123.98	99.7195
	622	622	124.142	128.667	622	99.7197	124.142	99.7197
	623	623	124.313	128.833	623	99.7184	124.313	99.7184
	624	624	124.483	129	624	99.718	124.483	99.718
	625	625	124.65	129.167	625	99.7171	124.65	99.7171
	626	626	124.82	129.333	626	99.716	124.82	99.716
	627	627	124.995	129.5	627	99.7148	124.995	99.7148
	628	628	125.175	129.667	628	99.714	125.175	99.714
	629	629	125.343	129.833	629	99.7131	125.343	99.7131
	630	630	125.518	130	630	99.712	125.518	99.712
	631	631	125.695	130.167	631	99.7109	125.695	99.7109
	632	632	125.863	130.333	632	99.71	125.863	99.71
	633	633	126.036	130.5	633	99.7085	126.036	99.7085
	634	634	126.201	130.667	634	99.707	126.201	99.707
	635	635	126.369	130.833	635	99.706	126.369	99.706
	636	636	126.546	131	636	99.7046	126.546	99.7046
	637	637	126.717	131.167	637	99.7034	126.717	99.7034
	638	638	126.894	131.333	638	99.7021	126.894	99.7021
	639	639	127.056	131.5	639	99.7012	127.056	99.7012
	640	640	127.236	131.667	640	99.7006	127.236	99.7006
	641	641	127.4	131.833	641	99.6994	127.4	99.6994
	642	642	127.573	132	642	99.6983	127.573	99.6983
	643	643	127.755	132.167	643	99.6978	127.755	99.6978
	644	644	127.913	132.333	644	99.697	127.913	99.697
	645	645	128.095	132.5	645	99.6964	128.095	99.6964
	646	646	128.263	132.667	646	99.6957	128.263	99.6957
	647	647	128.436	132.833	647	99.6949	128.436	99.6949
	648	648	128.599	133	648	99.6943	128.599	99.6943
	649	649	128.783	133.167	649	99.6939	128.783	99.6939
	650	650	128.951	133.333	650	99.694	128.951	99.694
	651	651	129.12	133.5	651	99.6939	129.12	99.6939
	652	652	129.294	133.667	652	99.6935	129.294	99.6935
	653	653	129.462	133.833	653	99.6929	129.462	99.6929
	654	654	129.635	134	654	99.6923	129.635	99.6923
	655	655	129.807	134.167	655	99.6916	129.807	99.6916
	656	656	129.985	134.333	656	99.6906	129.985	99.6906
	657	657	130.153	134.5	657	99.6899	130.153	99.6899
	658	658	130.317	134.667	658	99.6893	130.317	99.6893
	659	659	130.499	134.833	659	99.6888	130.499	99.6888
	660	660	130.672	135	660	99.6887	130.672	99.6887
	661	661	130.834	135.167	661	99.6883	130.834	99.6883
	662	662	131.006	135.333	662	99.6876	131.006	99.6876
	663	663	131.183	135.5	663	99.6867	131.183	99.6867
	664	664	131.356	135.667	664	99.6863	131.356	99.6863
	665	665	131.519	135.833	665	99.686	131.519	99.686
	666	666	131.699	136	666	99.6856	131.699	99.6856
	667	667	131.869	136.167	667	99.685	131.869	99.685
	668	668	132.034	136.333	668	99.6844	132.034	99.6844
	669	669	132.217	136.5	669	99.6835	132.217	99.6835
	670	670	132.387	136.667	670	99.6827	132.387	99.6827
	671	671	132.554	136.833	671	99.6818	132.554	99.6818
	672	672	132.735	137	672	99.6807	132.735	99.6807
	673	673	132.913	137.167	673	99.6801	132.913	99.6801
	674	674	133.075	137.333	674	99.6796	133.075	99.6796
	675	675	133.245	137.5	675	99.6791	133.245	99.6791
	676	676	133.416	137.667	676	99.6794	133.416	99.6794
	677	677	133.588	137.833	677	99.6791	133.588	99.6791
	678	678	133.761	138	678	99.6784	133.761	99.6784
	679	679	133.922	138.167	679	99.6777	133.922	99.6777
	680	680	134.102	138.333	680	99.6773	134.102	99.6773
	681	681	134.289	138.5	681	99.6771	134.289	99.6771
	682	682	134.455	138.667	682	99.6767	134.455	99.6767
	683	683	134.631	138.833	683	99.676	134.631	99.676
	684	684	134.8	139	684	99.6755	134.8	99.6755
	685	685	134.973	139.167	685	99.6747	134.973	99.6747
	686	686	135.145	139.333	686	99.6739	135.145	99.6739
	687	687	135.303	139.5	687	99.673	135.303	99.673
	688	688	135.473	139.667	688	99.6713	135.473	99.6713
	689	689	135.654	139.833	689	99.6702	135.654	99.6702
	690	690	135.826	140	690	99.6695	135.826	99.6695
	691	691	136.004	140.167	691	99.669	136.004	99.669
	692	692	136.182	140.333	692	99.6688	136.182	99.6688
	693	693	136.348	140.5	693	99.6683	136.348	99.6683
	694	694	136.521	140.667	694	99.6675	136.521	99.6675
	695	695	136.687	140.833	695	99.6665	136.687	99.6665
	696	696	136.851	141	696	99.6659	136.851	99.6659
	697	697	137.038	141.167	697	99.6651	137.038	99.6651
	698	698	137.214	141.333	698	99.6648	137.214	99.6648
	699	699	137.389	141.5	699	99.6649	137.389	99.6649
	700	700	137.553	141.667	700	99.665	137.553	99.665
	701	701	137.721	141.833	701	99.665	137.721	99.665
	702	702	137.886	142	702	99.6646	137.886	99.6646
	703	703	138.067	142.167	703	99.664	138.067	99.664
	704	704	138.246	142.333	704	99.6634	138.246	99.6634
	705	705	138.404	142.5	705	99.6626	138.404	99.6626
	706	706	138.585	142.667	706	99.662	138.585	99.662
	707	707	138.755	142.833	707	99.6616	138.755	99.6616
	708	708	138.923	143	708	99.6606	138.923	99.6606
	709	709	139.089	143.167	709	99.6596	139.089	99.6596
	710	710	139.272	143.333	710	99.6584	139.272	99.6584
	711	711	139.445	143.5	711	99.6571	139.445	99.6571
	712	712	139.612	143.667	712	99.6547	139.612	99.6547
	713	713	139.789	143.833	713	99.6526	139.789	99.6526
	714	714	139.963	144	714	99.6514	139.963	99.6514
	715	715	140.124	144.167	715	99.6512	140.124	99.6512
	716	716	140.294	144.333	716	99.6531	140.294	99.6531
	717	717	140.471	144.5	717	99.6546	140.471	99.6546
	718	718	140.643	144.667	718	99.656	140.643	99.656
	719	719	140.814	144.833	719	99.657	140.814	99.657
	720	720	140.986	145	720	99.658	140.986	99.658
	721	721	141.164	145.167	721	99.659	141.164	99.659
	722	722	141.332	145.333	722	99.6589	141.332	99.6589
	723	723	141.497	145.5	723	99.6583	141.497	99.6583
	724	724	141.67	145.667	724	99.6572	141.67	99.6572
	725	725	141.854	145.833	725	99.654	141.854	99.654
	726	726	142.029	146	726	99.6525	142.029	99.6525
	727	727	142.187	146.167	727	99.6515	142.187	99.6515
	728	728	142.369	146.333	728	99.6507	142.369	99.6507
	729	729	142.534	146.5	729	99.6506	142.534	99.6506
	730	730	142.706	146.667	730	99.6501	142.706	99.6501
	731	731	142.885	146.833	731	99.6493	142.885	99.6493
	732	732	143.061	147	732	99.6483	143.061	99.6483
	733	733	143.232	147.167	733	99.6474	143.232	99.6474
	734	734	143.401	147.333	734	99.6464	143.401	99.6464
	735	735	143.566	147.5	735	99.6452	143.566	99.6452
	736	736	143.74	147.667	736	99.6442	143.74	99.6442
	737	737	143.919	147.833	737	99.6439	143.919	99.6439
	738	738	144.09	148	738	99.6437	144.09	99.6437
	739	739	144.259	148.167	739	99.6434	144.259	99.6434
	740	740	144.431	148.333	740	99.6431	144.431	99.6431
	741	741	144.607	148.5	741	99.6439	144.607	99.6439
	742	742	144.774	148.667	742	99.6439	144.774	99.6439
	743	743	144.943	148.833	743	99.6438	144.943	99.6438
	744	744	145.12	149	744	99.6437	145.12	99.6437
	745	745	145.293	149.167	745	99.643	145.293	99.643
	746	746	145.46	149.333	746	99.6424	145.46	99.6424
	747	747	145.632	149.5	747	99.6419	145.632	99.6419
	748	748	145.807	149.667	748	99.6415	145.807	99.6415
	749	749	145.97	149.833	749	99.6407	145.97	99.6407
	750	750	146.139	150	750	99.6396	146.139	99.6396
	751	751	146.314	150.167	751	99.6383	146.314	99.6383
	752	752	146.483	150.333	752	99.6367	146.483	99.6367
	753	753	146.659	150.5	753	99.6342	146.659	99.6342
	754	754	146.835	150.667	754	99.6316	146.835	99.6316
	755	755	147.011	150.833	755	99.629	147.011	99.629
	756	756	147.174	151	756	99.6263	147.174	99.6263
	757	757	147.347	151.167	757	99.6234	147.347	99.6234
	758	758	147.514	151.333	758	99.6211	147.514	99.6211
	759	759	147.694	151.5	759	99.6193	147.694	99.6193
	760	760	147.86	151.667	760	99.6176	147.86	99.6176
	761	761	148.03	151.833	761	99.6171	148.03	99.6171
	762	762	148.208	152	762	99.6163	148.208	99.6163
	763	763	148.385	152.167	763	99.6155	148.385	99.6155
	764	764	148.546	152.333	764	99.6145	148.546	99.6145
	765	765	148.721	152.5	765	99.6136	148.721	99.6136
	766	766	148.899	152.667	766	99.6122	148.899	99.6122
	767	767	149.063	152.833	767	99.611	149.063	99.611
	768	768	149.237	153	768	99.6099	149.237	99.6099
	769	769	149.408	153.167	769	99.6085	149.408	99.6085
	770	770	149.581	153.333	770	99.6066	149.581	99.6066
	771	771	149.753	153.5	771	99.6052	149.753	99.6052
	772	772	149.934	153.667	772	99.6042	149.934	99.6042
	773	773	150.106	153.833	773	99.6037	150.106	99.6037
	774	774	150.278	154	774	99.6036	150.278	99.6036
	775	775	150.445	154.167	775	99.6033	150.445	99.6033
	776	776	150.625	154.333	776	99.6027	150.625	99.6027
	777	777	150.795	154.5	777	99.6021	150.795	99.6021
	778	778	150.964	154.667	778	99.6014	150.964	99.6014
	779	779	151.135	154.833	779	99.6006	151.135	99.6006
	780	780	151.295	155	780	99.5996	151.295	99.5996
	781	781	151.478	155.167	781	99.5979	151.478	99.5979
	782	782	151.647	155.333	782	99.5958	151.647	99.5958
	783	783	151.822	155.5	783	99.5941	151.822	99.5941
	784	784	151.994	155.667	784	99.5925	151.994	99.5925
	785	785	152.162	155.833	785	99.5909	152.162	99.5909
	786	786	152.336	156	786	99.5893	152.336	99.5893
	787	787	152.512	156.167	787	99.5876	152.512	99.5876
	788	788	152.683	156.333	788	99.586	152.683	99.586
	789	789	152.84	156.5	789	99.5846	152.84	99.5846
	790	790	153.021	156.667	790	99.5842	153.021	99.5842
	791	791	153.184	156.833	791	99.5836	153.184	99.5836
	792	792	153.363	157	792	99.5826	153.363	99.5826
	793	793	153.522	157.167	793	99.5815	153.522	99.5815
	794	794	153.712	157.333	794	99.5808	153.712	99.5808
	795	795	153.885	157.5	795	99.58	153.885	99.58
	796	796	154.049	157.667	796	99.5794	154.049	99.5794
	797	797	154.227	157.833	797	99.5787	154.227	99.5787
	798	798	154.406	158	798	99.5776	154.406	99.5776
	799	799	154.562	158.167	799	99.5767	154.562	99.5767
	800	800	154.733	158.333	800	99.5761	154.733	99.5761
	801	801	154.908	158.5	801	99.5757	154.908	99.5757
	802	802	155.081	158.667	802	99.5756	155.081	99.5756
	803	803	155.259	158.833	803	99.5746	155.259	99.5746
	804	804	155.427	159	804	99.5729	155.427	99.5729
	805	805	155.6	159.167	805	99.5711	155.6	99.5711
	806	806	155.767	159.333	806	99.5691	155.767	99.5691
	807	807	155.943	159.5	807	99.5678	155.943	99.5678
	808	808	156.114	159.667	808	99.5669	156.114	99.5669
	809	809	156.285	159.833	809	99.5659	156.285	99.5659
	810	810	156.46	160	810	99.5651	156.46	99.5651
	811	811	156.636	160.167	811	99.5641	156.636	99.5641
	812	812	156.804	160.333	812	99.5632	156.804	99.5632
	813	813	156.979	160.5	813	99.5623	156.979	99.5623
	814	814	157.149	160.667	814	99.5609	157.149	99.5609
	815	815	157.319	160.833	815	99.5594	157.319	99.5594
	816	816	157.5	161	816	99.5579	157.5	99.5579
	817	817	157.654	161.167	817	99.5564	157.654	99.5564
	818	818	157.838	161.333	818	99.5549	157.838	99.5549
	819	819	158.01	161.5	819	99.5535	158.01	99.5535
	820	820	158.18	161.667	820	99.5518	158.18	99.5518
	821	821	158.355	161.833	821	99.55	158.355	99.55
	822	822	158.523	162	822	99.5484	158.523	99.5484
	823	823	158.697	162.167	823	99.547	158.697	99.547
	824	824	158.871	162.333	824	99.5456	158.871	99.5456
	825	825	159.046	162.5	825	99.5444	159.046	99.5444
	826	826	159.217	162.667	826	99.5433	159.217	99.5433
	827	827	159.391	162.833	827	99.542	159.391	99.542
	828	828	159.563	163	828	99.5404	159.563	99.5404
	829	829	159.74	163.167	829	99.5388	159.74	99.5388
	830	830	159.898	163.333	830	99.5374	159.898	99.5374
	831	831	160.07	163.5	831	99.5361	160.07	99.5361
	832	832	160.244	163.667	832	99.5346	160.244	99.5346
	833	833	160.421	163.833	833	99.533	160.421	99.533
	834	834	160.588	164	834	99.5313	160.588	99.5313
	835	835	160.764	164.167	835	99.5297	160.764	99.5297
	836	836	160.938	164.333	836	99.5282	160.938	99.5282
	837	837	161.111	164.5	837	99.5268	161.111	99.5268
	838	838	161.282	164.667	838	99.5248	161.282	99.5248
	839	839	161.451	164.833	839	99.5229	161.451	99.5229
	840	840	161.628	165	840	99.5211	161.628	99.5211
	841	841	161.802	165.167	841	99.5195	161.802	99.5195
	842	842	161.964	165.333	842	99.5179	161.964	99.5179
	843	843	162.132	165.5	843	99.5167	162.132	99.5167
	844	844	162.312	165.667	844	99.5155	162.312	99.5155
	845	845	162.492	165.833	845	99.5141	162.492	99.5141
	846	846	162.663	166	846	99.513	162.663	99.513
	847	847	162.832	166.167	847	99.5116	162.832	99.5116
	848	848	162.995	166.333	848	99.5102	162.995	99.5102
	849	849	163.171	166.5	849	99.5088	163.171	99.5088
	850	850	163.345	166.667	850	99.5065	163.345	99.5065
	851	851	163.513	166.833	851	99.5045	163.513	99.5045
	852	852	163.688	167	852	99.5027	163.688	99.5027
	853	853	163.861	167.167	853	99.501	163.861	99.501
	854	854	164.035	167.333	854	99.4995	164.035	99.4995
	855	855	164.209	167.5	855	99.4982	164.209	99.4982
	856	856	164.371	167.667	856	99.4972	164.371	99.4972
	857	857	164.546	167.833	857	99.4963	164.546	99.4963
	858	858	164.721	168	858	99.4963	164.721	99.4963
	859	859	164.892	168.167	859	99.4958	164.892	99.4958
	860	860	165.063	168.333	860	99.495	165.063	99.495
	861	861	165.241	168.5	861	99.4939	165.241	99.4939
	862	862	165.407	168.667	862	99.4927	165.407	99.4927
	863	863	165.578	168.833	863	99.4916	165.578	99.4916
	864	864	165.747	169	864	99.4904	165.747	99.4904
	865	865	165.92	169.167	865	99.4891	165.92	99.4891
	866	866	166.089	169.333	866	99.487	166.089	99.487
	867	867	166.261	169.5	867	99.4852	166.261	99.4852
	868	868	166.445	169.667	868	99.4834	166.445	99.4834
	869	869	166.612	169.833	869	99.4817	166.612	99.4817
	870	870	166.791	170	870	99.4794	166.791	99.4794
	871	871	166.946	170.167	871	99.4772	166.946	99.4772
	872	872	167.118	170.333	872	99.4753	167.118	99.4753
	873	873	167.292	170.5	873	99.4735	167.292	99.4735
	874	874	167.476	170.667	874	99.4718	167.476	99.4718
	875	875	167.642	170.833	875	99.4701	167.642	99.4701
	876	876	167.81	171	876	99.4682	167.81	99.4682
	877	877	167.98	171.167	877	99.4663	167.98	99.4663
	878	878	168.157	171.333	878	99.4649	168.157	99.4649
	879	879	168.327	171.5	879	99.4634	168.327	99.4634
	880	880	168.495	171.667	880	99.462	168.495	99.462
	881	881	168.667	171.833	881	99.4604	168.667	99.4604
	882	882	168.844	172	882	99.4586	168.844	99.4586
	883	883	169.008	172.167	883	99.4571	169.008	99.4571
	884	884	169.188	172.333	884	99.4555	169.188	99.4555
	885	885	169.361	172.5	885	99.454	169.361	99.454
	886	886	169.52	172.667	886	99.4522	169.52	99.4522
	887	887	169.697	172.833	887	99.4501	169.697	99.4501
	888	888	169.868	173	888	99.4482	169.868	99.4482
	889	889	170.041	173.167	889	99.4465	170.041	99.4465
	890	890	170.219	173.333	890	99.4448	170.219	99.4448
	891	891	170.388	173.5	891	99.443	170.388	99.443
	892	892	170.56	173.667	892	99.4409	170.56	99.4409
	893	893	170.727	173.833	893	99.4384	170.727	99.4384
	894	894	170.904	174	894	99.4357	170.904	99.4357
	895	895	171.073	174.167	895	99.433	171.073	99.433
	896	896	171.242	174.333	896	99.4305	171.242	99.4305
	897	897	171.416	174.5	897	99.4279	171.416	99.4279
	898	898	171.581	174.667	898	99.4252	171.581	99.4252
	899	899	171.76	174.833	899	99.4227	171.76	99.4227
	900	900	171.941	175	900	99.4204	171.941	99.4204
	901	901	172.105	175.167	901	99.4184	172.105	99.4184
	902	902	172.279	175.333	902	99.4166	172.279	99.4166
	903	903	172.445	175.5	903	99.4153	172.445	99.4153
	904	904	172.628	175.667	904	99.4135	172.628	99.4135
	905	905	172.797	175.833	905	99.4117	172.797	99.4117
	906	906	172.969	176	906	99.4099	172.969	99.4099
	907	907	173.137	176.167	907	99.4083	173.137	99.4083
	908	908	173.313	176.333	908	99.4064	173.313	99.4064
	909	909	173.486	176.5	909	99.404	173.486	99.404
	910	910	173.653	176.667	910	99.4012	173.653	99.4012
	911	911	173.83	176.833	911	99.3983	173.83	99.3983
	912	912	173.996	177	912	99.3957	173.996	99.3957
	913	913	174.166	177.167	913	99.3934	174.166	99.3934
	914	914	174.336	177.333	914	99.3912	174.336	99.3912
	915	915	174.509	177.5	915	99.3893	174.509	99.3893
	916	916	174.691	177.667	916	99.3872	174.691	99.3872
	917	917	174.865	177.833	917	99.3851	174.865	99.3851
	918	918	175.033	178	918	99.3831	175.033	99.3831
	919	919	175.204	178.167	919	99.3818	175.204	99.3818
	920	920	175.38	178.333	920	99.3802	175.38	99.3802
	921	921	175.544	178.5	921	99.3782	175.544	99.3782
	922	922	175.71	178.667	922	99.3757	175.71	99.3757
	923	923	175.887	178.833	923	99.3729	175.887	99.3729
	924	924	176.056	179	924	99.3702	176.056	99.3702
	925	925	176.23	179.167	925	99.3676	176.23	99.3676
	926	926	176.411	179.333	926	99.3651	176.411	99.3651
	927	927	176.588	179.5	927	99.3619	176.588	99.3619
	928	928	176.753	179.667	928	99.3592	176.753	99.3592
	929	929	176.918	179.833	929	99.3568	176.918	99.3568
	930	930	177.086	180	930	99.3546	177.086	99.3546
	931	931	177.261	180.167	931	99.3526	177.261	99.3526
	932	932	177.435	180.333	932	99.3506	177.435	99.3506
	933	933	177.606	180.5	933	99.3479	177.606	99.3479
	934	934	177.784	180.667	934	99.345	177.784	99.345
	935	935	177.953	180.833	935	99.3426	177.953	99.3426
	936	936	178.124	181	936	99.3396	178.124	99.3396
	937	937	178.295	181.167	937	99.3371	178.295	99.3371
	938	938	178.468	181.333	938	99.3349	178.468	99.3349
	939	939	178.636	181.5	939	99.3324	178.636	99.3324
	940	940	178.807	181.667	940	99.3304	178.807	99.3304
	941	941	178.976	181.833	941	99.3282	178.976	99.3282
	942	942	179.16	182	942	99.3257	179.16	99.3257
	943	943	179.325	182.167	943	99.323	179.325	99.323
	944	944	179.502	182.333	944	99.3205	179.502	99.3205
	945	945	179.676	182.5	945	99.3179	179.676	99.3179
	946	946	179.845	182.667	946	99.3152	179.845	99.3152
	947	947	180.019	182.833	947	99.313	180.019	99.313
	948	948	180.19	183	948	99.3105	180.19	99.3105
	949	949	180.359	183.167	949	99.3079	180.359	99.3079
	950	950	180.528	183.333	950	99.3051	180.528	99.3051
	951	951	180.702	183.5	951	99.3022	180.702	99.3022
	952	952	180.877	183.667	952	99.2989	180.877	99.2989
	953	953	181.049	183.833	953	99.296	181.049	99.296
	954	954	181.218	184	954	99.2933	181.218	99.2933
	955	955	181.382	184.167	955	99.2909	181.382	99.2909
	956	956	181.565	184.333	956	99.2887	181.565	99.2887
	957	957	181.743	184.5	957	99.2861	181.743	99.2861
	958	958	181.902	184.667	958	99.2831	181.902	99.2831
	959	959	182.074	184.833	959	99.2801	182.074	99.2801
	960	960	182.251	185	960	99.2775	182.251	99.2775
	961	961	182.418	185.167	961	99.2751	182.418	99.2751
	962	962	182.596	185.333	962	99.2727	182.596	99.2727
	963	963	182.766	185.5	963	99.2703	182.766	99.2703
	964	964	182.937	185.667	964	99.2672	182.937	99.2672
	965	965	183.114	185.833	965	99.264	183.114	99.264
	966	966	183.281	186	966	99.2609	183.281	99.2609
	967	967	183.458	186.167	967	99.258	183.458	99.258
	968	968	183.627	186.333	968	99.2547	183.627	99.2547
	969	969	183.796	186.5	969	99.2518	183.796	99.2518
	970	970	183.97	186.667	970	99.2486	183.97	99.2486
	971	971	184.147	186.833	971	99.2453	184.147	99.2453
	972	972	184.316	187	972	99.2428	184.316	99.2428
	973	973	184.478	187.167	973	99.2401	184.478	99.2401
	974	974	184.664	187.333	974	99.2375	184.664	99.2375
	975	975	184.837	187.5	975	99.2349	184.837	99.2349
	976	976	185.003	187.667	976	99.2319	185.003	99.2319
	977	977	185.176	187.833	977	99.2286	185.176	99.2286
	978	978	185.351	188	978	99.2254	185.351	99.2254
	979	979	185.527	188.167	979	99.2224	185.527	99.2224
	980	980	185.691	188.333	980	99.2193	185.691	99.2193
	981	981	185.851	188.5	981	99.2164	185.851	99.2164
	982	982	186.025	188.667	982	99.2131	186.025	99.2131
	983	983	186.198	188.833	983	99.2095	186.198	99.2095
	984	984	186.382	189	984	99.2066	186.382	99.2066
	985	985	186.551	189.167	985	99.2036	186.551	99.2036
	986	986	186.724	189.333	986	99.2007	186.724	99.2007
	987	987	186.892	189.5	987	99.1978	186.892	99.1978
	988	988	187.07	189.667	988	99.1943	187.07	99.1943
	989	989	187.239	189.833	989	99.1908	187.239	99.1908
	990	990	187.409	190	990	99.1875	187.409	99.1875
	991	991	187.582	190.167	991	99.1844	187.582	99.1844
	992	992	187.747	190.333	992	99.181	187.747	99.181
	993	993	187.921	190.5	993	99.1778	187.921	99.1778
	994	994	188.092	190.667	994	99.1748	188.092	99.1748
	995	995	188.269	190.833	995	99.1717	188.269	99.1717
	996	996	188.441	191	996	99.1689	188.441	99.1689
	997	997	188.609	191.167	997	99.1657	188.609	99.1657
	998	998	188.784	191.333	998	99.1625	188.784	99.1625
	999	999	188.954	191.5	999	99.1594	188.954	99.1594
	1000	1000	189.124	191.667	1000	99.1557	189.124	99.1557
	1001	1001	189.299	191.833	1001	99.1526	189.299	99.1526
	1002	1002	189.472	192	1002	99.1493	189.472	99.1493
	1003	1003	189.642	192.167	1003	99.1458	189.642	99.1458
	1004	1004	189.814	192.333	1004	99.1424	189.814	99.1424
	1005	1005	189.982	192.5	1005	99.1395	189.982	99.1395
	1006	1006	190.16	192.667	1006	99.1367	190.16	99.1367
	1007	1007	190.341	192.833	1007	99.134	190.341	99.134
	1008	1008	190.509	193	1008	99.1312	190.509	99.1312
	1009	1009	190.669	193.167	1009	99.1279	190.669	99.1279
	1010	1010	190.839	193.333	1010	99.1246	190.839	99.1246
	1011	1011	191.015	193.5	1011	99.1215	191.015	99.1215
	1012	1012	191.19	193.667	1012	99.1182	191.19	99.1182
	1013	1013	191.358	193.833	1013	99.1147	191.358	99.1147
	1014	1014	191.529	194	1014	99.1111	191.529	99.1111
	1015	1015	191.707	194.167	1015	99.1076	191.707	99.1076
	1016	1016	191.879	194.333	1016	99.1043	191.879	99.1043
	1017	1017	192.052	194.5	1017	99.1005	192.052	99.1005
	1018	1018	192.226	194.667	1018	99.0969	192.226	99.0969
	1019	1019	192.395	194.833	1019	99.0937	192.395	99.0937
	1020	1020	192.569	195	1020	99.09	192.569	99.09
	1021	1021	192.735	195.167	1021	99.0859	192.735	99.0859
	1022	1022	192.909	195.333	1022	99.082	192.909	99.082
	1023	1023	193.088	195.5	1023	99.0783	193.088	99.0783
	1024	1024	193.253	195.667	1024	99.0747	193.253	99.0747
	1025	1025	193.43	195.833	1025	99.0711	193.43	99.0711
	1026	1026	193.605	196	1026	99.0674	193.605	99.0674
	1027	1027	193.776	196.167	1027	99.0635	193.776	99.0635
	1028	1028	193.939	196.333	1028	99.0602	193.939	99.0602
	1029	1029	194.112	196.5	1029	99.0566	194.112	99.0566
	1030	1030	194.28	196.667	1030	99.0529	194.28	99.0529
	1031	1031	194.455	196.833	1031	99.0495	194.455	99.0495
	1032	1032	194.629	197	1032	99.046	194.629	99.046
	1033	1033	194.798	197.167	1033	99.0422	194.798	99.0422
	1034	1034	194.969	197.333	1034	99.0382	194.969	99.0382
	1035	1035	195.147	197.5	1035	99.0343	195.147	99.0343
	1036	1036	195.323	197.667	1036	99.0309	195.323	99.0309
	1037	1037	195.498	197.833	1037	99.027	195.498	99.027
	1038	1038	195.661	198	1038	99.023	195.661	99.023
	1039	1039	195.827	198.167	1039	99.0189	195.827	99.0189
	1040	1040	195.996	198.333	1040	99.015	195.996	99.015
	1041	1041	196.175	198.5	1041	99.0109	196.175	99.0109
	1042	1042	196.348	198.667	1042	99.0069	196.348	99.0069
	1043	1043	196.525	198.833	1043	99.0032	196.525	99.0032
	1044	1044	196.694	199	1044	98.9998	196.694	98.9998
	1045	1045	196.86	199.167	1045	98.9966	196.86	98.9966
	1046	1046	197.032	199.333	1046	98.9934	197.032	98.9934
	1047	1047	197.21	199.5	1047	98.9903	197.21	98.9903
	1048	1048	197.382	199.667	1048	98.987	197.382	98.987
	1049	1049	197.554	199.833	1049	98.9832	197.554	98.9832
	1050	1050	197.722	200	1050	98.9795	197.722	98.9795
	1051	1051	197.898	200.167	1051	98.9759	197.898	98.9759
	1052	1052	198.065	200.333	1052	98.9722	198.065	98.9722
	1053	1053	198.24	200.5	1053	98.9676	198.24	98.9676
	1054	1054	198.412	200.667	1054	98.9633	198.412	98.9633
	1055	1055	198.579	200.833	1055	98.959	198.579	98.959
	1056	1056	198.742	201	1056	98.9547	198.742	98.9547
	1057	1057	198.922	201.167	1057	98.9507	198.922	98.9507
	1058	1058	199.089	201.333	1058	98.9466	199.089	98.9466
	1059	1059	199.265	201.5	1059	98.9422	199.265	98.9422
	1060	1060	199.441	201.667	1060	98.9375	199.441	98.9375
	1061	1061	199.604	201.833	1061	98.9333	199.604	98.9333
	1062	1062	199.777	202	1062	98.9292	199.777	98.9292
	1063	1063	199.946	202.167	1063	98.9251	199.946	98.9251
	1064	1064	200.134	202.333	1064	98.9212	200.134	98.9212
	1065	1065	200.295	202.5	1065	98.9179	200.295	98.9179
	1066	1066	200.465	202.667	1066	98.914	200.465	98.914
	1067	1067	200.634	202.833	1067	98.9099	200.634	98.9099
	1068	1068	200.81	203	1068	98.9058	200.81	98.9058
	1069	1069	200.979	203.167	1069	98.9019	200.979	98.9019
	1070	1070	201.152	203.333	1070	98.8979	201.152	98.8979
	1071	1071	201.322	203.5	1071	98.894	201.322	98.894
	1072	1072	201.502	203.667	1072	98.8901	201.502	98.8901
	1073	1073	201.669	203.833	1073	98.8857	201.669	98.8857
	1074	1074	201.837	204	1074	98.8812	201.837	98.8812
	1075	1075	202.002	204.167	1075	98.8767	202.002	98.8767
	1076	1076	202.181	204.333	1076	98.8722	202.181	98.8722
	1077	1077	202.348	204.5	1077	98.8676	202.348	98.8676
	1078	1078	202.518	204.667	1078	98.8633	202.518	98.8633
	1079	1079	202.694	204.833	1079	98.8588	202.694	98.8588
	1080	1080	202.862	205	1080	98.8541	202.862	98.8541
	1081	1081	203.034	205.167	1081	98.85	203.034	98.85
	1082	1082	203.215	205.333	1082	98.8457	203.215	98.8457
	1083	1083	203.373	205.5	1083	98.8415	203.373	98.8415
	1084	1084	203.56	205.667	1084	98.8374	203.56	98.8374
	1085	1085	203.723	205.833	1085	98.8333	203.723	98.8333
	1086	1086	203.889	206	1086	98.8289	203.889	98.8289
	1087	1087	204.061	206.167	1087	98.8243	204.061	98.8243
	1088	1088	204.231	206.333	1088	98.8196	204.231	98.8196
	1089	1089	204.402	206.5	1089	98.8152	204.402	98.8152
	1090	1090	204.581	206.667	1090	98.8107	204.581	98.8107
	1091	1091	204.743	206.833	1091	98.8063	204.743	98.8063
	1092	1092	204.926	207	1092	98.8019	204.926	98.8019
	1093	1093	205.102	207.167	1093	98.7973	205.102	98.7973
	1094	1094	205.26	207.333	1094	98.7923	205.26	98.7923
	1095	1095	205.433	207.5	1095	98.7874	205.433	98.7874
	1096	1096	205.611	207.667	1096	98.7826	205.611	98.7826
	1097	1097	205.778	207.833	1097	98.7775	205.778	98.7775
	1098	1098	205.949	208	1098	98.7723	205.949	98.7723
	1099	1099	206.115	208.167	1099	98.7669	206.115	98.7669
	1100	1100	206.283	208.333	1100	98.7616	206.283	98.7616
	1101	1101	206.461	208.5	1101	98.7565	206.461	98.7565
	1102	1102	206.632	208.667	1102	98.7515	206.632	98.7515
	1103	1103	206.806	208.833	1103	98.7466	206.806	98.7466
	1104	1104	206.98	209	1104	98.7415	206.98	98.7415
	1105	1105	207.152	209.167	1105	98.7364	207.152	98.7364
	1106	1106	207.317	209.333	1106	98.7313	207.317	98.7313
	1107	1107	207.501	209.5	1107	98.7263	207.501	98.7263
	1108	1108	207.669	209.667	1108	98.7213	207.669	98.7213
	1109	1109	207.837	209.833	1109	98.7164	207.837	98.7164
	1110	1110	208.004	210	1110	98.7117	208.004	98.7117
	1111	1111	208.183	210.167	1111	98.7073	208.183	98.7073
	1112	1112	208.347	210.333	1112	98.7029	208.347	98.7029
	1113	1113	208.527	210.5	1113	98.6984	208.527	98.6984
	1114	1114	208.697	210.667	1114	98.6941	208.697	98.6941
	1115	1115	208.866	210.833	1115	98.6893	208.866	98.6893
	1116	1116	209.036	211	1116	98.6845	209.036	98.6845
	1117	1117	209.214	211.167	1117	98.6797	209.214	98.6797
	1118	1118	209.385	211.333	1118	98.674	209.385	98.674
	1119	1119	209.556	211.5	1119	98.669	209.556	98.669
	1120	1120	209.726	211.667	1120	98.6641	209.726	98.6641
	1121	1121	209.894	211.833	1121	98.6589	209.894	98.6589
	1122	1122	210.075	212	1122	98.6537	210.075	98.6537
	1123	1123	210.235	212.167	1123	98.6479	210.235	98.6479
	1124	1124	210.415	212.333	1124	98.642	210.415	98.642
	1125	1125	210.586	212.5	1125	98.6362	210.586	98.6362
	1126	1126	210.754	212.667	1126	98.63	210.754	98.63
	1127	1127	210.927	212.833	1127	98.6243	210.927	98.6243
	1128	1128	211.096	213	1128	98.6188	211.096	98.6188
	1129	1129	211.266	213.167	1129	98.6132	211.266	98.6132
	1130	1130	211.435	213.333	1130	98.6086	211.435	98.6086
	1131	1131	211.61	213.5	1131	98.6035	211.61	98.6035
	1132	1132	211.789	213.667	1132	98.598	211.789	98.598
	1133	1133	211.955	213.833	1133	98.5922	211.955	98.5922
	1134	1134	212.136	214	1134	98.586	212.136	98.586
	1135	1135	212.305	214.167	1135	98.5801	212.305	98.5801
	1136	1136	212.468	214.333	1136	98.5744	212.468	98.5744
	1137	1137	212.647	214.5	1137	98.5687	212.647	98.5687
	1138	1138	212.816	214.667	1138	98.5631	212.816	98.5631
	1139	1139	212.98	214.833	1139	98.5576	212.98	98.5576
	1140	1140	213.149	215	1140	98.5518	213.149	98.5518
	1141	1141	213.327	215.167	1141	98.5459	213.327	98.5459
	1142	1142	213.498	215.333	1142	98.5403	213.498	98.5403
	1143	1143	213.67	215.5	1143	98.5345	213.67	98.5345
	1144	1144	213.839	215.667	1144	98.5287	213.839	98.5287
	1145	1145	214.009	215.833	1145	98.523	214.009	98.523
	1146	1146	214.189	216	1146	98.5167	214.189	98.5167
	1147	1147	214.351	216.167	1147	98.5104	214.351	98.5104
	1148	1148	214.526	216.333	1148	98.504	214.526	98.504
	1149	1149	214.696	216.5	1149	98.4977	214.696	98.4977
	1150	1150	214.866	216.667	1150	98.4913	214.866	98.4913
	1151	1151	215.034	216.833	1151	98.4852	215.034	98.4852
	1152	1152	215.21	217	1152	98.4791	215.21	98.4791
	1153	1153	215.38	217.167	1153	98.4729	215.38	98.4729
	1154	1154	215.557	217.333	1154	98.4666	215.557	98.4666
	1155	1155	215.725	217.5	1155	98.4603	215.725	98.4603
	1156	1156	215.908	217.667	1156	98.4538	215.908	98.4538
	1157	1157	216.067	217.833	1157	98.4473	216.067	98.4473
	1158	1158	216.235	218	1158	98.4399	216.235	98.4399
	1159	1159	216.411	218.167	1159	98.4325	216.411	98.4325
	1160	1160	216.581	218.333	1160	98.4255	216.581	98.4255
	1161	1161	216.753	218.5	1161	98.4185	216.753	98.4185
	1162	1162	216.924	218.667	1162	98.4117	216.924	98.4117
	1163	1163	217.101	218.833	1163	98.4049	217.101	98.4049
	1164	1164	217.262	219	1164	98.3982	217.262	98.3982
	1165	1165	217.444	219.167	1165	98.3914	217.444	98.3914
	1166	1166	217.61	219.333	1166	98.3848	217.61	98.3848
	1167	1167	217.777	219.5	1167	98.3779	217.777	98.3779
	1168	1168	217.956	219.667	1168	98.3712	217.956	98.3712
	1169	1169	218.122	219.833	1169	98.3645	218.122	98.3645
	1170	1170	218.297	220	1170	98.3575	218.297	98.3575
	1171	1171	218.471	220.167	1171	98.351	218.471	98.351
	1172	1172	218.641	220.333	1172	98.3445	218.641	98.3445
	1173	1173	218.805	220.5	1173	98.3378	218.805	98.3378
	1174	1174	218.975	220.667	1174	98.3312	218.975	98.3312
	1175	1175	219.154	220.833	1175	98.3241	219.154	98.3241
	1176	1176	219.328	221	1176	98.3172	219.328	98.3172
	1177	1177	219.492	221.167	1177	98.3102	219.492	98.3102
	1178	1178	219.668	221.333	1178	98.3027	219.668	98.3027
	1179	1179	219.83	221.5	1179	98.2954	219.83	98.2954
	1180	1180	220.004	221.667	1180	98.2879	220.004	98.2879
	1181	1181	220.174	221.833	1181	98.2804	220.174	98.2804
	1182	1182	220.342	222	1182	98.2729	220.342	98.2729
	1183	1183	220.524	222.167	1183	98.2654	220.524	98.2654
	1184	1184	220.697	222.333	1184	98.2582	220.697	98.2582
	1185	1185	220.865	222.5	1185	98.251	220.865	98.251
	1186	1186	221.03	222.667	1186	98.2438	221.03	98.2438
	1187	1187	221.204	222.833	1187	98.2365	221.204	98.2365
	1188	1188	221.382	223	1188	98.2289	221.382	98.2289
	1189	1189	221.55	223.167	1189	98.2211	221.55	98.2211
	1190	1190	221.716	223.333	1190	98.2133	221.716	98.2133
	1191	1191	221.895	223.5	1191	98.2051	221.895	98.2051
	1192	1192	222.069	223.667	1192	98.1969	222.069	98.1969
	1193	1193	222.233	223.833	1193	98.1886	222.233	98.1886
	1194	1194	222.407	224	1194	98.1804	222.407	98.1804
	1195	1195	222.583	224.167	1195	98.1724	222.583	98.1724
	1196	1196	222.75	224.333	1196	98.1644	222.75	98.1644
	1197	1197	222.925	224.5	1197	98.1564	222.925	98.1564
	1198	1198	223.094	224.667	1198	98.1486	223.094	98.1486
	1199	1199	223.258	224.833	1199	98.1404	223.258	98.1404
	1200	1200	223.441	225	1200	98.1316	223.441	98.1316
	1201	1201	223.611	225.167	1201	98.1228	223.611	98.1228
	1202	1202	223.781	225.333	1202	98.1139	223.781	98.1139
	1203	1203	223.95	225.5	1203	98.1048	223.95	98.1048
	1204	1204	224.118	225.667	1204	98.0963	224.118	98.0963
	1205	1205	224.294	225.833	1205	98.0881	224.294	98.0881
	1206	1206	224.472	226	1206	98.0798	224.472	98.0798
	1207	1207	224.643	226.167	1207	98.072	224.643	98.072
	1208	1208	224.807	226.333	1208	98.0635	224.807	98.0635
	1209	1209	224.978	226.5	1209	98.055	224.978	98.055
	1210	1210	225.153	226.667	1210	98.0465	225.153	98.0465
	1211	1211	225.316	226.833	1211	98.0374	225.316	98.0374
	1212	1212	225.487	227	1212	98.0288	225.487	98.0288
	1213	1213	225.662	227.167	1213	98.0204	225.662	98.0204
	1214	1214	225.829	227.333	1214	98.0119	225.829	98.0119
	1215	1215	226.007	227.5	1215	98.0033	226.007	98.0033
	1216	1216	226.177	227.667	1216	97.9944	226.177	97.9944
	1217	1217	226.354	227.833	1217	97.9855	226.354	97.9855
	1218	1218	226.514	228	1218	97.9765	226.514	97.9765
	1219	1219	226.686	228.167	1219	97.967	226.686	97.967
	1220	1220	226.857	228.333	1220	97.958	226.857	97.958
	1221	1221	227.029	228.5	1221	97.9489	227.029	97.9489
	1222	1222	227.197	228.667	1222	97.9396	227.197	97.9396
	1223	1223	227.368	228.833	1223	97.9304	227.368	97.9304
	1224	1224	227.544	229	1224	97.921	227.544	97.921
	1225	1225	227.715	229.167	1225	97.9117	227.715	97.9117
	1226	1226	227.888	229.333	1226	97.9023	227.888	97.9023
	1227	1227	228.064	229.5	1227	97.8929	228.064	97.8929
	1228	1228	228.232	229.667	1228	97.8834	228.232	97.8834
	1229	1229	228.4	229.833	1229	97.8736	228.4	97.8736
	1230	1230	228.566	230	1230	97.8635	228.566	97.8635
	1231	1231	228.737	230.167	1231	97.8537	228.737	97.8537
	1232	1232	228.902	230.333	1232	97.8436	228.902	97.8436
	1233	1233	229.078	230.5	1233	97.8337	229.078	97.8337
	1234	1234	229.253	230.667	1234	97.8239	229.253	97.8239
	1235	1235	229.422	230.833	1235	97.8142	229.422	97.8142
	1236	1236	229.591	231	1236	97.8052	229.591	97.8052
	1237	1237	229.768	231.167	1237	97.7966	229.768	97.7966
	1238	1238	229.935	231.333	1238	97.7882	229.935	97.7882
	1239	1239	230.108	231.5	1239	97.7809	230.108	97.7809
	1240	1240	230.278	231.667	1240	97.7726	230.278	97.7726
	1241	1241	230.441	231.833	1241	97.7638	230.441	97.7638
	1242	1242	230.616	232	1242	97.7545	230.616	97.7545
	1243	1243	230.787	232.167	1243	97.7448	230.787	97.7448
	1244	1244	230.961	232.333	1244	97.7344	230.961	97.7344
	1245	1245	231.131	232.5	1245	97.7237	231.131	97.7237
	1246	1246	231.297	232.667	1246	97.7127	231.297	97.7127
	1247	1247	231.471	232.833	1247	97.7007	231.471	97.7007
	1248	1248	231.642	233	1248	97.6892	231.642	97.6892
	1249	1249	231.813	233.167	1249	97.6778	231.813	97.6778
	1250	1250	231.984	233.333	1250	97.6662	231.984	97.6662
	1251	1251	232.154	233.5	1251	97.6545	232.154	97.6545
	1252	1252	232.324	233.667	1252	97.6429	232.324	97.6429
	1253	1253	232.497	233.833	1253	97.6314	232.497	97.6314
	1254	1254	232.667	234	1254	97.6198	232.667	97.6198
	1255	1255	232.843	234.167	1255	97.6077	232.843	97.6077
	1256	1256	233.009	234.333	1256	97.5956	233.009	97.5956
	1257	1257	233.19	234.5	1257	97.5836	233.19	97.5836
	1258	1258	233.363	234.667	1258	97.5717	233.363	97.5717
	1259	1259	233.527	234.833	1259	97.5596	233.527	97.5596
	1260	1260	233.695	235	1260	97.5474	233.695	97.5474
	1261	1261	233.866	235.167	1261	97.535	233.866	97.535
	1262	1262	234.04	235.333	1262	97.5226	234.04	97.5226
	1263	1263	234.214	235.5	1263	97.5107	234.214	97.5107
	1264	1264	234.382	235.667	1264	97.4985	234.382	97.4985
	1265	1265	234.555	235.833	1265	97.4864	234.555	97.4864
	1266	1266	234.727	236	1266	97.4742	234.727	97.4742
	1267	1267	234.9	236.167	1267	97.4619	234.9	97.4619
	1268	1268	235.069	236.333	1268	97.4494	235.069	97.4494
	1269	1269	235.242	236.5	1269	97.437	235.242	97.437
	1270	1270	235.412	236.667	1270	97.4246	235.412	97.4246
	1271	1271	235.578	236.833	1271	97.4123	235.578	97.4123
	1272	1272	235.751	237	1272	97.4	235.751	97.4
	1273	1273	235.917	237.167	1273	97.388	235.917	97.388
	1274	1274	236.089	237.333	1274	97.376	236.089	97.376
	1275	1275	236.254	237.5	1275	97.3641	236.254	97.3641
	1276	1276	236.42	237.667	1276	97.352	236.42	97.352
	1277	1277	236.593	237.833	1277	97.3393	236.593	97.3393
	1278	1278	236.768	238	1278	97.3265	236.768	97.3265
	1279	1279	236.943	238.167	1279	97.3138	236.943	97.3138
	1280	1280	237.11	238.333	1280	97.3001	237.11	97.3001
	1281	1281	237.288	238.5	1281	97.2868	237.288	97.2868
	1282	1282	237.46	238.667	1282	97.2734	237.46	97.2734
	1283	1283	237.624	238.833	1283	97.2598	237.624	97.2598
	1284	1284	237.788	239	1284	97.2464	237.788	97.2464
	1285	1285	237.964	239.167	1285	97.233	237.964	97.233
	1286	1286	238.126	239.333	1286	97.2197	238.126	97.2197
	1287	1287	238.306	239.5	1287	97.2061	238.306	97.2061
	1288	1288	238.472	239.667	1288	97.1922	238.472	97.1922
	1289	1289	238.654	239.833	1289	97.1783	238.654	97.1783
	1290	1290	238.819	240	1290	97.1645	238.819	97.1645
	1291	1291	238.995	240.167	1291	97.1506	238.995	97.1506
	1292	1292	239.158	240.333	1292	97.1366	239.158	97.1366
	1293	1293	239.33	240.5	1293	97.1229	239.33	97.1229
	1294	1294	239.511	240.667	1294	97.1089	239.511	97.1089
	1295	1295	239.679	240.833	1295	97.0947	239.679	97.0947
	1296	1296	239.845	241	1296	97.0804	239.845	97.0804
	1297	1297	240.018	241.167	1297	97.0659	240.018	97.0659
	1298	1298	240.188	241.333	1298	97.0515	240.188	97.0515
	1299	1299	240.355	241.5	1299	97.0371	240.355	97.0371
	1300	1300	240.534	241.667	1300	97.0224	240.534	97.0224
	1301	1301	240.695	241.833	1301	97.0083	240.695	97.0083
	1302	1302	240.871	242	1302	96.9949	240.871	96.9949
	1303	1303	241.041	242.167	1303	96.9817	241.041	96.9817
	1304	1304	241.211	242.333	1304	96.9692	241.211	96.9692
	1305	1305	241.384	242.5	1305	96.9557	241.384	96.9557
	1306	1306	241.55	242.667	1306	96.9416	241.55	96.9416
	1307	1307	241.724	242.833	1307	96.927	241.724	96.927
	1308	1308	241.89	243	1308	96.9112	241.89	96.9112
	1309	1309	242.06	243.167	1309	96.8955	242.06	96.8955
	1310	1310	242.229	243.333	1310	96.8795	242.229	96.8795
	1311	1311	242.404	243.5	1311	96.8633	242.404	96.8633
	1312	1312	242.576	243.667	1312	96.8461	242.576	96.8461
	1313	1313	242.745	243.833	1313	96.8297	242.745	96.8297
	1314	1314	242.909	244	1314	96.8136	242.909	96.8136
	1315	1315	243.083	244.167	1315	96.7977	243.083	96.7977
	1316	1316	243.258	244.333	1316	96.7823	243.258	96.7823
	1317	1317	243.425	244.5	1317	96.7665	243.425	96.7665
	1318	1318	243.6	244.667	1318	96.7503	243.6	96.7503
	1319	1319	243.77	244.833	1319	96.7339	243.77	96.7339
	1320	1320	243.938	245	1320	96.7178	243.938	96.7178
	1321	1321	244.115	245.167	1321	96.7014	244.115	96.7014
	1322	1322	244.282	245.333	1322	96.6851	244.282	96.6851
	1323	1323	244.455	245.5	1323	96.6689	244.455	96.6689
	1324	1324	244.625	245.667	1324	96.653	244.625	96.653
	1325	1325	244.796	245.833	1325	96.6369	244.796	96.6369
	1326	1326	244.964	246	1326	96.6205	244.964	96.6205
	1327	1327	245.132	246.167	1327	96.6039	245.132	96.6039
	1328	1328	245.301	246.333	1328	96.5874	245.301	96.5874
	1329	1329	245.472	246.5	1329	96.5705	245.472	96.5705
	1330	1330	245.646	246.667	1330	96.5535	245.646	96.5535
	1331	1331	245.814	246.833	1331	96.5366	245.814	96.5366
	1332	1332	245.984	247	1332	96.5191	245.984	96.5191
	1333	1333	246.16	247.167	1333	96.5012	246.16	96.5012
	1334	1334	246.336	247.333	1334	96.4834	246.336	96.4834
	1335	1335	246.509	247.5	1335	96.4657	246.509	96.4657
	1336	1336	246.663	247.667	1336	96.4479	246.663	96.4479
	1337	1337	246.837	247.833	1337	96.4301	246.837	96.4301
	1338	1338	247.011	248	1338	96.4125	247.011	96.4125
	1339	1339	247.188	248.167	1339	96.395	247.188	96.395
	1340	1340	247.357	248.333	1340	96.3781	247.357	96.3781
	1341	1341	247.524	248.5	1341	96.3605	247.524	96.3605
	1342	1342	247.698	248.667	1342	96.3426	247.698	96.3426
	1343	1343	247.86	248.833	1343	96.3243	247.86	96.3243
	1344	1344	248.029	249	1344	96.3059	248.029	96.3059
	1345	1345	248.205	249.167	1345	96.2867	248.205	96.2867
	1346	1346	248.375	249.333	1346	96.2675	248.375	96.2675
	1347	1347	248.543	249.5	1347	96.2482	248.543	96.2482
	1348	1348	248.712	249.667	1348	96.2288	248.712	96.2288
	1349	1349	248.884	249.833	1349	96.209	248.884	96.209
	1350	1350	249.058	250	1350	96.1896	249.058	96.1896
	1351	1351	249.227	250.167	1351	96.1704	249.227	96.1704
	1352	1352	249.39	250.333	1352	96.1513	249.39	96.1513
	1353	1353	249.566	250.5	1353	96.1326	249.566	96.1326
	1354	1354	249.737	250.667	1354	96.1133	249.737	96.1133
	1355	1355	249.909	250.833	1355	96.0937	249.909	96.0937
	1356	1356	250.08	251	1356	96.0741	250.08	96.0741
	1357	1357	250.249	251.167	1357	96.0543	250.249	96.0543
	1358	1358	250.421	251.333	1358	96.0346	250.421	96.0346
	1359	1359	250.597	251.5	1359	96.0149	250.597	96.0149
	1360	1360	250.764	251.667	1360	95.9951	250.764	95.9951
	1361	1361	250.931	251.833	1361	95.9747	250.931	95.9747
	1362	1362	251.105	252	1362	95.9543	251.105	95.9543
	1363	1363	251.275	252.167	1363	95.9338	251.275	95.9338
	1364	1364	251.446	252.333	1364	95.9133	251.446	95.9133
	1365	1365	251.622	252.5	1365	95.8922	251.622	95.8922
	1366	1366	251.786	252.667	1366	95.8716	251.786	95.8716
	1367	1367	251.952	252.833	1367	95.851	251.952	95.851
	1368	1368	252.116	253	1368	95.8302	252.116	95.8302
	1369	1369	252.295	253.167	1369	95.809	252.295	95.809
	1370	1370	252.459	253.333	1370	95.7878	252.459	95.7878
	1371	1371	252.639	253.5	1371	95.7666	252.639	95.7666
	1372	1372	252.811	253.667	1372	95.7454	252.811	95.7454
	1373	1373	252.978	253.833	1373	95.7236	252.978	95.7236
	1374	1374	253.147	254	1374	95.7024	253.147	95.7024
	1375	1375	253.319	254.167	1375	95.6813	253.319	95.6813
	1376	1376	253.484	254.333	1376	95.6601	253.484	95.6601
	1377	1377	253.665	254.5	1377	95.6389	253.665	95.6389
	1378	1378	253.832	254.667	1378	95.6171	253.832	95.6171
	1379	1379	254.001	254.833	1379	95.5951	254.001	95.5951
	1380	1380	254.169	255	1380	95.5731	254.169	95.5731
	1381	1381	254.329	255.167	1381	95.5501	254.329	95.5501
	1382	1382	254.511	255.333	1382	95.5276	254.511	95.5276
	1383	1383	254.68	255.5	1383	95.5053	254.68	95.5053
	1384	1384	254.849	255.667	1384	95.4829	254.849	95.4829
	1385	1385	255.02	255.833	1385	95.4603	255.02	95.4603
	1386	1386	255.189	256	1386	95.4373	255.189	95.4373
	1387	1387	255.365	256.167	1387	95.4141	255.365	95.4141
	1388	1388	255.531	256.333	1388	95.3909	255.531	95.3909
	1389	1389	255.701	256.5	1389	95.3672	255.701	95.3672
	1390	1390	255.876	256.667	1390	95.3436	255.876	95.3436
	1391	1391	256.044	256.833	1391	95.3202	256.044	95.3202
	1392	1392	256.22	257	1392	95.2968	256.22	95.2968
	1393	1393	256.388	257.167	1393	95.2733	256.388	95.2733
	1394	1394	256.55	257.333	1394	95.249	256.55	95.249
	1395	1395	256.727	257.5	1395	95.2249	256.727	95.2249
	1396	1396	256.904	257.667	1396	95.2008	256.904	95.2008
	1397	1397	257.071	257.833	1397	95.1762	257.071	95.1762
	1398	1398	257.236	258	1398	95.1518	257.236	95.1518
	1399	1399	257.403	258.167	1399	95.1274	257.403	95.1274
	1400	1400	257.573	258.333	1400	95.103	257.573	95.103
	1401	1401	257.741	258.5	1401	95.0786	257.741	95.0786
	1402	1402	257.912	258.667	1402	95.0533	257.912	95.0533
	1403	1403	258.08	258.833	1403	95.0281	258.08	95.0281
	1404	1404	258.254	259	1404	95.003	258.254	95.003
	1405	1405	258.424	259.167	1405	94.9775	258.424	94.9775
	1406	1406	258.594	259.333	1406	94.9521	258.594	94.9521
	1407	1407	258.763	259.5	1407	94.9269	258.763	94.9269
	1408	1408	258.936	259.667	1408	94.9017	258.936	94.9017
	1409	1409	259.111	259.833	1409	94.8769	259.111	94.8769
	1410	1410	259.284	260	1410	94.8511	259.284	94.8511
	1411	1411	259.46	260.167	1411	94.8251	259.46	94.8251
	1412	1412	259.622	260.333	1412	94.7989	259.622	94.7989
	1413	1413	259.791	260.5	1413	94.7722	259.791	94.7722
	1414	1414	259.966	260.667	1414	94.7455	259.966	94.7455
	1415	1415	260.133	260.833	1415	94.719	260.133	94.719
	1416	1416	260.297	261	1416	94.6925	260.297	94.6925
	1417	1417	260.471	261.167	1417	94.6658	260.471	94.6658
	1418	1418	260.641	261.333	1418	94.6383	260.641	94.6383
	1419	1419	260.808	261.5	1419	94.611	260.808	94.611
	1420	1420	260.981	261.667	1420	94.5837	260.981	94.5837
	1421	1421	261.154	261.833	1421	94.556	261.154	94.556
	1422	1422	261.324	262	1422	94.5284	261.324	94.5284
	1423	1423	261.486	262.167	1423	94.5009	261.486	94.5009
	1424	1424	261.661	262.333	1424	94.4734	261.661	94.4734
	1425	1425	261.831	262.5	1425	94.4465	261.831	94.4465
	1426	1426	261.999	262.667	1426	94.4184	261.999	94.4184
	1427	1427	262.163	262.833	1427	94.3902	262.163	94.3902
	1428	1428	262.342	263	1428	94.3617	262.342	94.3617
	1429	1429	262.512	263.167	1429	94.3332	262.512	94.3332
	1430	1430	262.681	263.333	1430	94.3044	262.681	94.3044
	1431	1431	262.851	263.5	1431	94.2756	262.851	94.2756
	1432	1432	263.023	263.667	1432	94.2463	263.023	94.2463
	1433	1433	263.193	263.833	1433	94.2165	263.193	94.2165
	1434	1434	263.356	264	1434	94.1865	263.356	94.1865
	1435	1435	263.53	264.167	1435	94.1566	263.53	94.1566
	1436	1436	263.697	264.333	1436	94.1269	263.697	94.1269
	1437	1437	263.87	264.5	1437	94.0972	263.87	94.0972
	1438	1438	264.039	264.667	1438	94.0673	264.039	94.0673
	1439	1439	264.21	264.833	1439	94.0375	264.21	94.0375
	1440	1440	264.384	265	1440	94.0073	264.384	94.0073
	1441	1441	264.548	265.167	1441	93.9769	264.548	93.9769
	1442	1442	264.729	265.333	1442	93.9463	264.729	93.9463
	1443	1443	264.899	265.5	1443	93.9156	264.899	93.9156
	1444	1444	265.062	265.667	1444	93.8848	265.062	93.8848
	1445	1445	265.229	265.833	1445	93.854	265.229	93.854
	1446	1446	265.396	266	1446	93.8225	265.396	93.8225
	1447	1447	265.577	266.167	1447	93.7911	265.577	93.7911
	1448	1448	265.749	266.333	1448	93.7594	265.749	93.7594
	1449	1449	265.908	266.5	1449	93.7275	265.908	93.7275
	1450	1450	266.076	266.667	1450	93.6954	266.076	93.6954
	1451	1451	266.249	266.833	1451	93.6633	266.249	93.6633
	1452	1452	266.423	267	1452	93.6312	266.423	93.6312
	1453	1453	266.6	267.167	1453	93.5991	266.6	93.5991
	1454	1454	266.765	267.333	1454	93.5666	266.765	93.5666
	1455	1455	266.932	267.5	1455	93.5341	266.932	93.5341
	1456	1456	267.101	267.667	1456	93.5012	267.101	93.5012
	1457	1457	267.264	267.833	1457	93.4681	267.264	93.4681
	1458	1458	267.446	268	1458	93.4346	267.446	93.4346
	1459	1459	267.611	268.167	1459	93.4013	267.611	93.4013
	1460	1460	267.78	268.333	1460	93.3679	267.78	93.3679
	1461	1461	267.958	268.5	1461	93.3345	267.958	93.3345
	1462	1462	268.126	268.667	1462	93.3006	268.126	93.3006
	1463	1463
